# Supplementary material
Source: MDPI journal article supplement (https://www.mdpi.com/2311-5637/7/3/134)
Supplement: s1 [file s1 › Supplementary tables.xlsx]

## Sheet: Table S1
Table S1. Abundance for bacterial OTUs							Date	01_Dec2019	03_Jun2020	03_Jun2020	03_Jun2020	01_Dec2019	02_Mar2020	03_Jun2020	03_Jun2020	01_Dec2019	01_Dec2019	01_Dec2019	03_Jun2020	02_Mar2020	03_Jun2020	02_Mar2020	03_Jun2020	02_Mar2020	03_Jun2020	01_Dec2019	03_Jun2020	01_Dec2019	03_Jun2020	02_Mar2020	02_Mar2020	01_Dec2019	02_Mar2020	03_Jun2020	01_Dec2019	03_Jun2020	01_Dec2019	03_Jun2020	01_Dec2019	01_Dec2019	02_Mar2020	02_Mar2020	03_Jun2020	01_Dec2019	02_Mar2020	01_Dec2019	03_Jun2020	03_Jun2020	03_Jun2020
							Position	D5	G3	E2	H4	F4	B5	C1	D2	G4	E5	H3	F3	A4	B1	C5	A1	B4	E3	F5	H5	D4	G2	C4	A5	E4	H1	F2	H2	D3	G5	B3	A5	C4	G5	H2	F1	H1	E4	B4	A2	C3	G1
otu_id	kingdom	phylum	class	order	family	genus	species	D5_Dec_2019_Winery	G3_Jun_2020_Winery	E2_Jun_2020_Winery	H4_Jun_2020_Winery	F4_Dec_2019_Winery	B5_Mar_2020_Winery	C1_Jun_2020_Winery	D2_Jun_2020_Winery	G4_Dec_2019_Winery	E5_Dec_2019_Winery	H3_Dec_2019_Winery	F3_Jun_2020_Winery	A4_Mar_2020_Winery	B1_Jun_2020_Winery	C5_Mar_2020_Winery	A1_Jun_2020_Winery	B4_Mar_2020_Winery	E3_Jun_2020_Winery	F5_Dec_2019_Winery	H5_Jun_2020_Winery	D4_Dec_2019_Winery	G2_Jun_2020_Winery	C4_Mar_2020_Winery	A5_Mar_2020_Winery	E4_Dec_2019_Winery	H1_Mar_2020_Winery	F2_Jun_2020_Winery	H2_Dec_2019_Winery	D3_Jun_2020_Winery	G5_Dec_2019_Winery	B3_Jun_2020_Winery	A5_Dec_2019_Winery	C4_Dec_2019_Winery	G5_Mar_2020_Winery	H2_Mar_2020_Winery	F1_Jun_2020_Winery	H1_Dec_2019_Winery	E4_Mar_2020_Winery	B4_Dec_2019_Winery	A2_Jun_2020_Winery	C3_Jun_2020_Winery	G1_Jun_2020_Winery
51b212e61d6db503455b5a8a3fbdb99b_rep;size=772517;	k__Bacteria	p__Actinobacteria	c__Actinobacteria	o__Micrococcales	f__Micrococcaceae	f__Micrococcaceae	f__Micrococcaceae	8143	186	5824	1356	1341	201	4893	14133	88	150	151	19663	16386	15985	44	9847	3171	21775	65	8	286	6696	9397	9756	1691	21810	20096	4119	6490	496	14553	127	2713	679	12667	9874	1904	4860	6215	7840	23833	20721
f359d6b12d6df77fce3684238719e6c2_rep;size=211412;	k__Bacteria	p__Proteobacteria	c__Alphaproteobacteria	o__Sphingomonadales	f__Sphingomonadaceae	g__Sphingomonas	g__Sphingomonas	1508	507	153	2588	555	1603	213	272	9374	205	4517	75	2	217	57	1485	652	418	11147	174	13380	100	1257	58	872	313	236	2906	904	587	450	31	4103	296	769	2607	1818	220	471	815	894	279
30e5008446c8d887928617836a2d7541_rep;size=170204;	k__Bacteria	p__Actinobacteria	c__Actinobacteria	o__Micrococcales	f__Beutenbergiaceae	g__metagenome	s__metagenome	1215	124	3321	908	608	154	1045	4030	35	28	71	9803	1467	2379	7	1402	486	5456	63	3	100	3373	1338	1292	346	1200	8226	1221	3020	114	2609	212	407	145	1740	3746	600	995	902	1478	3690	4192
7337431bc35b58de39893e6d6db1772b_rep;size=154374;	k__Bacteria	p__Actinobacteria	c__Actinobacteria	o__Micrococcales	f__Micrococcaceae	f__Micrococcaceae	f__Micrococcaceae	662	62	309	771	844	38	1662	1464	41	65	110	1065	109	2850	11	1450	76	1771	48	2	103	911	1610	182	412	7274	747	2715	880	273	279	2	1027	195	5495	1262	912	675	385	641	4047	1698
2cd30e9eda91687ba73dcae76f4f1880_rep;size=110211;	k__Bacteria	p__Proteobacteria	c__Alphaproteobacteria	o__Caulobacterales	f__Caulobacteraceae	g__Brevundimonas	g__Brevundimonas	862	637	35	1586	36	2432	106	132	489	4	192	19	4263	90	2744	258	3942	223	514	334	704	198	268	1303	121	118	59	377	3947	355	429	238	267	1005	271	1670	246	64	177	378	403	78
ef8f5021a8339a923b93540aaf64c270_rep;size=91596;	k__Bacteria	p__Proteobacteria	c__Alphaproteobacteria	o__Sphingomonadales	f__Sphingomonadaceae	g__Sphingomonas	Ambiguous_taxa	542	65	27	309	254	2910	100	162	236	555	5157	32	7	495	7255	1219	148	212	960	681	1403	10	671	142	201	69	124	977	388	103	220	89	572	181	143	894	505	81	81	2986	167	168
5fc8ebf8d49daeb9c8dfdbdcee7b5e75_rep;size=84033;	k__Bacteria	p__Firmicutes	c__Bacilli	o__Bacillales	f__Family XII	g__Exiguobacterium	g__Exiguobacterium	19	420	2255	206	3	28	40	1657	1	1	1	2288	156	114	1	12	163	384	1	164	7	1751	41	254	15	56	5599	160	85	277	358	77	19	61	117	296	14	188	112	36	716	2722
5d899896a54dd0d0747cf6260509bf39_rep;size=76718;	k__Bacteria	p__Proteobacteria	c__Alphaproteobacteria	o__Sphingomonadales	f__Sphingomonadaceae	g__Sphingomonas	Ambiguous_taxa	265	75	26	481	193	2158	76	93	75	94	1635	26	77	107	8677	295	202	215	1679	105	595	29	515	102	222	146	79	1443	651	245	230	61	420	912	408	1128	647	98	52	443	245	124
287724862e9c79428f81438435edb914_rep;size=72057;	k__Bacteria	p__Actinobacteria	c__Actinobacteria	o__Micrococcales	f__Beutenbergiaceae	g__metagenome	s__metagenome	606	37	948	446	278	50	423	1472	21	11	31	3706	544	1055	4	662	192	2122	15	0	40	1392	680	461	142	687	2410	499	1488	46	1071	88	186	103	911	1670	262	444	471	574	1442	1761
eb3345f763903853f3b167423fed5972_rep;size=65683;	k__Bacteria	p__Actinobacteria	c__Actinobacteria	o__Micrococcales	f__Micrococcaceae	f__Micrococcaceae	f__Micrococcaceae	210	32	188	67	277	2	772	674	13	19	31	946	3	1439	8	677	18	1222	23	0	17	812	508	30	189	1994	738	743	389	107	234	0	307	77	1635	416	438	675	66	455	1686	577
ad2281ce47473ddbb0457df697779754_rep;size=60049;	k__Bacteria	p__Proteobacteria	c__Alphaproteobacteria	o__Rhizobiales	f__Beijerinckiaceae	g__Methylobacterium	Ambiguous_taxa	27	5	17	366	52	2494	37	31	140	5244	2180	14	0	46	1022	47	12	63	1114	140	92	0	402	5	55	7	21	18	192	68	6	0	28	403	13	85	15	67	39	242	7	28
23ca4e9167969521c1b4e0449c136d90_rep;size=53792;	k__Bacteria	p__Actinobacteria	c__Actinobacteria	o__Micrococcales	f__Promicromonosporaceae	f__Promicromonosporaceae	f__Promicromonosporaceae	1245	5	1055	85	9	13	200	1317	2	4	9	1435	469	539	2	636	192	1293	3	1	22	1141	331	603	212	462	2844	470	653	9	1321	19	186	19	517	817	314	185	202	442	1197	1677
ffc36e27c82042664a16bcd4d380b286_rep;size=50300;	k__Bacteria	p__Proteobacteria	c__Gammaproteobacteria	o__Enterobacteriales	f__Enterobacteriaceae	g__Escherichia-Shigella	g__Escherichia-Shigella	0	0	0	0	1	2	1	3	0	0	0	0	0	0	0	0	1	1	0	0	0	2	0	0	0	0	0	0	0	1	1	0	0	2	9	0	0	0	1	0	2	0
b806e0462569e4b3467b396640400484_rep;size=49877;	k__Bacteria	p__Proteobacteria	c__Alphaproteobacteria	o__Sphingomonadales	f__Sphingomonadaceae	g__Sphingomonas	g__Sphingomonas	178	51	8	433	53	2558	45	17	715	3426	2790	11	1	24	287	239	48	41	2176	163	1437	9	383	48	88	26	7	235	245	63	35	24	257	161	48	544	187	8	53	249	49	24
08995258dcab3634cbbe385927d19c0b_rep;size=48617;	k__Bacteria	p__Proteobacteria	c__Alphaproteobacteria	o__Caulobacterales	f__Caulobacteraceae	g__Brevundimonas	g__Brevundimonas	51	957	77	578	8	765	165	44	137	2	21	32	657	18	69	19	1147	36	52	163	203	323	91	98	25	24	136	122	1083	890	198	147	46	97	28	915	59	11	344	34	284	42
630860d80a9dc35ed55113eeb8a3e761_rep;size=44260;	k__Bacteria	p__Proteobacteria	c__Alphaproteobacteria	o__Rhodobacterales	f__Rhodobacteraceae	g__Paracoccus	g__Paracoccus	100	21	826	110	87	5	294	944	16	0	2	221	181	521	2	1337	142	500	8	3	3	2113	282	128	52	57	3392	435	484	11	474	66	122	96	285	2521	170	57	148	3735	224	709
2fb909e0cda6c7dd824cb0ff8c4a22d8_rep;size=44000;	k__Bacteria	p__Actinobacteria	c__Actinobacteria	o__Micrococcales	f__Micrococcaceae	g__Kocuria	g__Kocuria	587	2	110	59	31	2	253	401	3	6	10	171	78	556	3	463	33	429	1	0	15	315	291	73	199	2055	353	665	162	16	163	0	362	17	1096	317	365	122	69	290	1113	611
c69a45985b7ce40a800b0104cfbfb185_rep;size=41818;	k__Bacteria	p__Actinobacteria	c__Actinobacteria	o__Micrococcales	f__Micrococcaceae	f__Micrococcaceae	f__Micrococcaceae	585	0	104	46	13	1	183	491	1	7	12	165	34	727	0	1441	25	383	1	0	13	238	280	79	209	1671	267	658	154	2	134	0	320	2	992	294	315	114	42	625	867	651
4715d00a2315b24a3fcc1b66ae839a94_rep;size=41676;	k__Bacteria	p__Proteobacteria	c__Alphaproteobacteria	o__Rhizobiales	f__Beijerinckiaceae	g__Methylobacterium	g__Methylobacterium	62	3	15	83	343	120	127	56	186	12322	44	32	0	38	455	53	7	27	448	29	21	7	261	3	31	8	34	118	427	33	6	0	26	236	2	53	10	136	16	90	21	40
e7b7a5a818b18e5d580c2610697665af_rep;size=38980;	k__Bacteria	p__Proteobacteria	c__Alphaproteobacteria	o__Rhodobacterales	f__Rhodobacteraceae	g__Paracoccus	g__Paracoccus	161	5	211	72	116	1	145	382	17	7	9	35	0	111	1	80	4	253	14	0	9	367	47	6	74	699	217	764	197	21	73	5	89	50	1790	571	1197	16	17	157	74	1206
45823aed0f507b73a601876d4a4f45e7_rep;size=38371;	k__Bacteria	p__Proteobacteria	c__Alphaproteobacteria	o__Sphingomonadales	f__Sphingomonadaceae	g__Sphingomonas	Ambiguous_taxa	100	0	1	2387	10	2208	4	0	14	21	344	7	1948	14	178	3	102	8	8	69	6	0	1226	2426	16	7	3	50	51	50	487	52	215	53	30	35	13	21	4	8	467	5
9ae75bd5a59471f4a7e594e3a5f056d3_rep;size=36141;	k__Bacteria	p__Proteobacteria	c__Alphaproteobacteria	o__Sphingomonadales	f__Sphingomonadaceae	g__Sphingomonas	g__Sphingomonas	74	1	9	1405	55	784	55	42	23	35	904	21	96	62	107	383	29	61	530	1	46	1	756	116	37	22	39	62	66	19	103	32	425	73	39	202	69	78	24	797	125	29
7446d062e4e06e4df1b0f225a370deb0_rep;size=35462;	k__Bacteria	p__Actinobacteria	c__Actinobacteria	o__Micrococcales	f__Micrococcaceae	g__Kocuria	g__Kocuria	702	3	879	41	18	4	100	959	0	2	2	1021	311	335	1	380	130	821	1	0	13	615	221	476	146	307	2141	320	464	6	846	19	111	5	302	565	242	131	102	284	749	1247
e2232ee1cf45b4c5d2847533efdd4202_rep;size=32683;	k__Bacteria	p__Actinobacteria	c__Actinobacteria	o__Micrococcales	f__Micrococcaceae	f__Micrococcaceae	f__Micrococcaceae	0	474	1064	8	5	9	69	575	0	0	0	2747	65	100	0	5	81	378	0	1	5	1918	19	173	3	12	4722	5	58	1137	144	2	0	252	7	188	1	32	43	91	151	617
f045a975242a08e61edb737161916121_rep;size=25887;	k__Bacteria	p__Proteobacteria	c__Alphaproteobacteria	o__Acetobacterales	f__Acetobacteraceae	g__Acetobacter	g__Acetobacter	0	0	1	0	0	1	1	0	0	0	0	0	0	0	0	0	2	1	0	0	0	2	0	0	0	0	0	0	0	0	0	0	0	3	4	0	0	18	0	0	0	0
69a74210e3311cb6069c57687b8b932e_rep;size=24675;	k__Bacteria	p__Actinobacteria	c__Actinobacteria	o__Micrococcales	f__Micrococcaceae	f__Micrococcaceae	f__Micrococcaceae	42	1	24	26	298	0	189	194	10	13	1	94	0	1826	1	4423	2	256	0	0	41	8	135	2	93	71	42	159	105	39	52	0	130	1	37	210	63	16	57	2345	124	204
e1c699168695912018fb8ae276fc6caf_rep;size=24012;	k__Bacteria	p__Deinococcus-Thermus	c__Deinococci	o__Deinococcales	f__Deinococcaceae	g__Deinococcus	g__Deinococcus	77	0	8	257	16	3	31	31	477	9	2	11	0	53	0	331	1	37	7159	0	1	0	26	5	12	6	19	257	24	8	11	2	32	78	31	518	42	2	8	664	43	41
eb22905b6f4f9e46d68e84d518d6dc05_rep;size=23350;	k__Bacteria	p__Proteobacteria	c__Alphaproteobacteria	o__Caulobacterales	f__Caulobacteraceae	g__Brevundimonas	g__Brevundimonas	62	270	22	423	9	2153	43	19	10	1	42	3	16	6	19	7	2240	35	12	97	169	111	28	39	20	18	25	51	535	31	33	23	53	59	62	123	38	11	79	25	8	39
b6733f0dd761763c6ec523a6bf2a2db6_rep;size=18284;	k__Bacteria	p__Actinobacteria	c__Actinobacteria	o__Micrococcales	f__Micrococcaceae	g__Paenarthrobacter	g__Paenarthrobacter	801	5	173	15	17	18	102	158	5	52	59	185	221	191	3	215	167	292	21	0	78	144	126	195	225	193	354	142	81	16	241	35	271	6	141	123	211	45	67	157	204	250
0d9fd09285674f6f7ea3c1a92dcc5f86_rep;size=18027;	k__Bacteria	p__Proteobacteria	c__Alphaproteobacteria	o__Rhodobacterales	f__Rhodobacteraceae	g__Paracoccus	g__Paracoccus	542	1	18	21	40	1	64	164	3	5	2	8	0	165	0	192	21	107	7	0	2	20	102	37	29	148	73	153	202	5	380	10	55	22	343	195	206	20	22	466	91	171
4b2e48c3518bbf3c95472d5a3db39f72_rep;size=17925;	k__Bacteria	p__Firmicutes	c__Bacilli	o__Lactobacillales	f__Leuconostocaceae	g__Oenococcus	g__Oenococcus	1	1	0	14	2	1	0	4	1	0	0	9	0	0	0	0	0	7	0	0	0	0	6	0	0	13	1	0	2	1	5	0	0	2	12	0	0	2	0	0	8	2
09c0453f143beda25c4038c91b59ca0f_rep;size=16614;	k__Bacteria	p__Proteobacteria	c__Alphaproteobacteria	o__Sphingomonadales	f__Sphingomonadaceae	g__Altererythrobacter	Ambiguous_taxa	36	1	18	7	76	4	39	76	11	7	31	11	0	27	3	186	0	81	24	0	136	19	36	3	63	31	37	443	138	13	22	1	129	6	137	1094	275	38	11	76	44	52
4d4e0b11914e5e63dec3cb95a321837a_rep;size=15522;	k__Bacteria	p__Actinobacteria	c__Actinobacteria	o__Micrococcales	f__Microbacteriaceae	f__Microbacteriaceae	f__Microbacteriaceae	100	9	6	263	178	13	15	31	29	7	68	28	0	63	0	80	23	169	18	10	61	13	211	6	33	101	8	196	108	56	26	9	98	39	107	290	70	68	85	117	90	31
2c2373750fc3a8ed30208e3eaf666bd4_rep;size=14812;	k__Bacteria	p__Actinobacteria	c__Actinobacteria	o__Micrococcales	f__Micrococcaceae	g__Kocuria	g__Kocuria	14	5	26	6	107	3	1269	126	17	8	7	101	1	754	0	1259	10	128	5	0	22	22	58	5	24	168	59	71	183	76	55	1	53	15	77	559	31	40	14	283	277	85
627983d781d087b4bd3ffefbfd79e17e_rep;size=14752;	k__Bacteria	p__Actinobacteria	c__Actinobacteria	o__Micrococcales	f__Micrococcaceae	g__Kocuria	g__Kocuria	349	1	239	18	4	2	48	358	0	1	4	420	118	184	1	187	42	339	1	0	4	212	98	193	53	185	602	127	215	0	329	6	58	1	151	268	106	63	46	95	348	454
9d97ac95fb66be233f85abd58309eb52_rep;size=14723;	k__Bacteria	p__Proteobacteria	c__Alphaproteobacteria	o__Rhizobiales	f__Beijerinckiaceae	g__Methylobacterium	Ambiguous_taxa	4	14	3	335	3	244	34	6	241	54	2339	5	0	10	295	15	7	1	416	179	126	1	28	1	58	2	3	6	30	53	0	2	4	103	1	54	1	121	36	52	3	12
0aa6767415c3c1d08d147c80b16ec596_rep;size=14591;	k__Bacteria	p__Proteobacteria	c__Gammaproteobacteria	o__Pseudomonadales	f__Moraxellaceae	g__Acinetobacter	s__uncultured bacterium	0	1	4	935	1	0	5	28	0	0	0	9	1	6	1500	3	2859	28	0	2	0	86	186	0	2	10	3	45	0	1	0	0	32	2594	18	1	2	3	0	2	0	17
3b45fe8b1cd37902e569f74166b2380c_rep;size=14475;	k__Bacteria	p__Proteobacteria	c__Alphaproteobacteria	o__Rhodobacterales	f__Rhodobacteraceae	g__Paracoccus	g__Paracoccus	20	93	40	355	19	5	55	73	3	2	2	20	0	31	3	171	2	345	1	43	3	81	32	7	15	36	152	208	656	9	10	4	12	42	137	2833	66	11	6	236	10	93
4174e90d9bd9be0973f694e1575a12c8_rep;size=14276;	k__Bacteria	p__Proteobacteria	c__Alphaproteobacteria	o__Acetobacterales	f__Acetobacteraceae	g__Roseomonas	g__Roseomonas	90	6	13	13	7	3	15	17	7	1	4	10	0	27	1	485	27	20	18	14	11	7	17	6	20	3	15	24	630	4	220	7	40	174	13	14	10	6	27	311	126	28
5bd0e74a0b38a4efbaea12ed95c14cd4_rep;size=13949;	Unassigned	Unassigned	Unassigned	Unassigned	Unassigned	Unassigned	Unassigned	65	1	0	72	28	1	1	0	16	3	7	2	0	3	0	10	5	7	7	1	18	1	1417	0	13	1	0	56	3	6	7	5	9226	22	5	5	15	24	3	4	10	2
567fe60b15c1a8335de70b0bc3fbe9f7_rep;size=13900;	k__Bacteria	p__Actinobacteria	c__Actinobacteria	o__Micrococcales	o__Micrococcales	o__Micrococcales	o__Micrococcales	175	1	83	52	6	2	83	220	0	0	8	92	1	149	0	412	8	128	2	0	16	170	71	14	72	177	164	303	115	3	42	0	86	1	223	134	171	42	9	144	291	211
cbea4edf7a452f0be4a5e0cfdc5929b5_rep;size=13868;	k__Bacteria	p__Proteobacteria	c__Alphaproteobacteria	o__Sphingomonadales	f__Sphingomonadaceae	g__Sphingomonas	g__Sphingomonas	103	10	2	62	6	194	0	5	307	32	1055	0	3	3	10	79	36	4	1023	8	1487	0	39	0	55	1	1	169	13	4	8	2	196	8	8	105	156	4	2	48	9	7
04b6142fbbf534ec82f07d42848a670b_rep;size=13265;	k__Bacteria	p__Proteobacteria	c__Alphaproteobacteria	o__Rhizobiales	f__Beijerinckiaceae	f__Beijerinckiaceae	f__Beijerinckiaceae	0	17	0	9	8	0	0	1	19	0	27	1	0	1	0	0	0	8	1	0	6	0	4	0	28	0	12	0	3386	0	5	0	95	10	5	30	5	0	0	0	121	1
36c55bd2d0539477743be798ad053972_rep;size=13204;	k__Bacteria	p__Proteobacteria	c__Alphaproteobacteria	o__Rhizobiales	f__Xanthobacteraceae	f__Xanthobacteraceae	f__Xanthobacteraceae	1	8370	0	10	0	1	0	9	2	0	0	3	0	0	0	0	1	0	2	35	0	7	15	0	2	1	5	0	484	0	0	21	32	41	0	0	0	1	5	2	0	1
17813d59fbe6e3242168934b16220c25_rep;size=13100;	k__Bacteria	p__Proteobacteria	c__Alphaproteobacteria	o__Sphingomonadales	f__Sphingomonadaceae	g__Novosphingobium	g__Novosphingobium	72	228	114	463	15	35	12	12	14	0	23	13	37	15	14	59	452	18	11	817	2452	17	184	139	97	9	4	55	104	4	33	83	64	3	21	89	28	5	43	15	13	28
44f1dc6802761224c2a2cd9047d09294_rep;size=12661;	k__Bacteria	p__Actinobacteria	c__Actinobacteria	o__Micrococcales	f__Microbacteriaceae	g__Microbacterium	g__Microbacterium	199	81	125	161	90	25	32	157	6	1	3	465	1092	90	0	3	58	393	15	1	4	338	77	154	30	70	394	169	62	70	181	31	22	67	137	76	54	54	205	38	145	329
1e2a1224aa82d7243e24da1c0a59daa3_rep;size=12174;	k__Bacteria	p__Proteobacteria	c__Alphaproteobacteria	o__Sphingomonadales	f__Sphingomonadaceae	g__Sphingomonas	g__Sphingomonas	5	13	0	36	8	52	10	13	4	0	50	1	0	8	13	175	13	7	34	8	1574	4	10	8	7	8	7	40	42	3	2	10	30	4	33	513	39	8	12	60	12	14
3fd17808cdba930b8e6d39290fc240d4_rep;size=12166;	k__Bacteria	p__Proteobacteria	c__Alphaproteobacteria	o__Sphingomonadales	f__Sphingomonadaceae	g__Sphingomonas	Ambiguous_taxa	7	0	0	75	1	307	4	2	47	847	60	1	0	5	4583	19	18	6	97	3	24	0	50	2	1	3	0	7	6	11	8	0	26	18	4	8	3	12	7	18	1	0
e9b4fce404e4dffd852691bfc8ab7092_rep;size=11576;	k__Bacteria	p__Proteobacteria	c__Gammaproteobacteria	o__Betaproteobacteriales	f__Burkholderiaceae	f__Burkholderiaceae	f__Burkholderiaceae	4	0	3	78	9	34	1	1	0	3	1469	3	1	10	1	327	1	6	3467	1	20	0	23	0	18	0	4	9	1	34	4	0	175	1	0	128	25	0	2	77	4	3
dabc7c50732d1d97fec11c61b09082c0_rep;size=11051;	k__Bacteria	p__Firmicutes	c__Bacilli	o__Lactobacillales	f__Carnobacteriaceae	f__Carnobacteriaceae	f__Carnobacteriaceae	0	130	137	1	0	0	7875	77	0	0	0	68	0	6	0	1	3	25	0	2	0	149	1	2	0	0	585	2	2	10	4	0	0	57	0	19	0	4	0	6	82	62
15da8b3417459a1a66342300e6968701_rep;size=10941;	k__Bacteria	p__Proteobacteria	c__Alphaproteobacteria	o__Rhizobiales	f__Beijerinckiaceae	g__Methylobacterium	Ambiguous_taxa	8	5	1	72	4	192	10	2	51	915	708	4	0	2	66	4	4	2	766	102	9	0	78	0	19	2	5	1	23	152	1	1	4	90	1	10	3	3	2	7	0	0
3dec9766a6cb2d543d443509689a2863_rep;size=10538;	k__Bacteria	p__Proteobacteria	c__Alphaproteobacteria	o__Rhizobiales	f__Beijerinckiaceae	g__Methylobacterium	Ambiguous_taxa	0	4	12	8	11	739	0	1	143	1	6	0	0	0	1097	0	0	10	424	369	82	0	6	0	17	0	0	8	27	22	0	0	7	68	0	1	3	2	2	0	0	0
495b6a85aa4acc34937165b9971c2c6b_rep;size=9906;	k__Bacteria	p__Proteobacteria	c__Alphaproteobacteria	o__Sphingomonadales	f__Sphingomonadaceae	g__Sphingomonas	Ambiguous_taxa	0	0	0	102	1	34	6	0	1	0	4041	0	1	8	256	2	2	3	112	0	153	0	3	14	0	0	3	5	8	2	0	1	20	14	4	67	3	27	1	0	0	2
a7ce49330fc791458df3c5e07e5353c2_rep;size=9715;	k__Bacteria	p__Firmicutes	c__Bacilli	o__Bacillales	f__Planococcaceae	g__Planococcus	g__Planococcus	9	3	338	0	1	0	2	1006	1	0	0	337	17	17	0	0	9	44	0	0	0	2303	5	9	2	0	2158	5	5	1	59	4	1	0	12	52	4	1	77	32	6	1488
c64b552bee81919d0ddb16ec614349a4_rep;size=9189;	k__Bacteria	p__Proteobacteria	c__Alphaproteobacteria	o__Azospirillales	f__Azospirillaceae	g__Skermanella	g__Skermanella	31	1	13	14	77	1	1770	19	5	14	0	29	0	91	2	104	8	32	7	4	2	2	18	2	47	0	13	51	115	6	4	2	36	3	1	1443	20	2	29	50	19	71
f1f27804de982773258f4f7872ca584c_rep;size=9003;	k__Bacteria	p__Proteobacteria	c__Alphaproteobacteria	o__Rhizobiales	f__Xanthobacteraceae	g__Ancylobacter	Ambiguous_taxa	0	1426	3	32	0	0	0	0	0	0	0	1	0	0	0	0	0	0	0	1	0	2	0	0	1	1	1	0	21	0	3	2	0	0	0	0	0	0	47	0	0	1
8e5f55b22aea4cd3f55b247700661249_rep;size=8581;	k__Bacteria	p__Actinobacteria	c__Actinobacteria	o__Micrococcales	f__Micrococcaceae	g__Kocuria	g__Kocuria	103	0	66	31	4	0	49	140	1	2	5	86	2	73	0	63	3	85	3	0	7	114	41	11	53	116	114	196	74	1	34	3	60	1	151	74	110	25	4	53	182	119
2164e40cb22143f4fb8ebe25ee8bb325_rep;size=8549;	k__Bacteria	p__Firmicutes	c__Bacilli	o__Lactobacillales	f__Carnobacteriaceae	g__Trichococcus	g__Trichococcus	11	1	5	90	3	0	19	19	5	1	0	51	0	100	1	0	2	10	0	210	0	39	3	0	13	8	11	72	1	58	190	1154	32	8	11	3	27	4	18	9	7	21
29b9b0c2d3a36ff404bfba4cb63aca1e_rep;size=8513;	k__Bacteria	p__Actinobacteria	c__Actinobacteria	o__Micrococcales	f__Intrasporangiaceae	f__Intrasporangiaceae	f__Intrasporangiaceae	120	5	6	9	95	2	52	59	5	4	3	64	0	180	0	219	15	253	1	0	6	33	702	5	19	238	9	73	114	171	80	2	48	707	137	66	34	40	149	144	265	77
27e9bcc56877a98aaa1db150236b8f42_rep;size=8235;	k__Bacteria	p__Proteobacteria	c__Gammaproteobacteria	o__Betaproteobacteriales	f__Burkholderiaceae	f__Burkholderiaceae	f__Burkholderiaceae	0	5	0	5	2	0	1	0	1	0	0	3	1	0	0	0	0	2	0	2812	0	12	0	0	0	0	1	1	0	6	0	0	0	8	0	0	0	0	0	0	0	0
09448c4b2d2edf0f06e58763e6e8b352_rep;size=8084;	k__Bacteria	p__Actinobacteria	c__Actinobacteria	o__Micrococcales	f__Micrococcaceae	g__Kocuria	g__Kocuria	52	0	15	1	5	1	170	86	0	4	0	37	0	420	0	1413	2	58	0	0	9	9	29	7	49	56	46	55	57	1	57	0	59	3	22	123	29	7	6	492	94	80
2dba390ca45ed12001ff378cedd7e381_rep;size=7769;	k__Bacteria	k__Bacteria	k__Bacteria	k__Bacteria	k__Bacteria	k__Bacteria	k__Bacteria	318	2	1	0	0	3	0	0	23	348	304	0	0	0	0	4	6	0	104	0	420	0	0	0	289	0	0	87	0	1	0	58	207	0	0	0	230	0	6	0	0	0
7cb5d4cc92aacdb2c085a5e0dcfda6a0_rep;size=7741;	k__Bacteria	p__Actinobacteria	c__Actinobacteria	o__Micrococcales	f__Micrococcaceae	f__Micrococcaceae	f__Micrococcaceae	57	0	39	3	4	0	42	85	1	0	2	56	0	101	0	112	5	113	0	0	3	89	26	6	37	183	80	100	20	1	32	0	34	5	123	57	81	43	5	40	196	63
101637aba474a6614786486ad42acb11_rep;size=7608;	k__Bacteria	p__Firmicutes	c__Bacilli	o__Lactobacillales	f__Streptococcaceae	g__Streptococcus	s__uncultured bacterium	0	0	0	1	0	0	0	0	1	1	0	0	0	2	0	0	0	2	0	0	0	2	0	1	4	1	0	10	0	1	0	0	1	0	1	1	1	0	0	0	0	0
088b577ca10412aeecacc5e1f5b283e4_rep;size=7453;	k__Bacteria	p__Proteobacteria	c__Alphaproteobacteria	o__Rhodobacterales	f__Rhodobacteraceae	f__Rhodobacteraceae	f__Rhodobacteraceae	20	0	71	16	10	1	46	364	1	0	0	13	2	30	1	51	22	110	1	0	3	67	36	7	9	55	160	139	95	2	72	3	21	10	184	189	49	23	13	50	66	191
f2ddccf69492f26b8022cc0d68c76fda_rep;size=7357;	k__Bacteria	p__Proteobacteria	c__Alphaproteobacteria	o__Sphingomonadales	f__Sphingomonadaceae	g__Sphingomonas	g__Sphingomonas	22	6	1	181	13	1622	0	0	1420	52	19	6	0	1	10	6	5	0	19	736	9	0	16	0	7	1	2	9	22	30	0	4	7	36	0	22	5	0	25	21	3	4
368e36f5c321541a66472087be605404_rep;size=7121;	k__Bacteria	p__Proteobacteria	c__Alphaproteobacteria	o__Caulobacterales	f__Caulobacteraceae	g__Brevundimonas	g__Brevundimonas	2	48	11	7	0	4	4	8	5	0	0	4	0	0	0	4	4	1	0	1	9	61	0	7	4	1	8	2	1253	13	1	58	19	47	3	35	12	0	1	2	1	3
ebd6f32452e0629f78e4f3cc820d3757_rep;size=6749;	k__Bacteria	p__Actinobacteria	c__Actinobacteria	o__Micrococcales	f__Micrococcaceae	f__Micrococcaceae	f__Micrococcaceae	61	1	77	2	1	0	45	104	0	1	1	60	4	82	0	72	3	84	0	0	0	118	33	19	24	179	300	82	21	13	44	0	41	1	113	29	54	24	3	32	181	108
098cb4a2e9c8b5df7989db6d8a9a02dc_rep;size=6724;	k__Bacteria	p__Proteobacteria	c__Alphaproteobacteria	o__Acetobacterales	f__Acetobacteraceae	g__Roseomonas	Ambiguous_taxa	41	0	3	22	95	1	82	46	7	14	20	1	0	100	1	233	2	28	0	0	9	0	11	0	30	0	45	104	48	9	0	0	43	0	5	10	24	8	21	245	0	43
fbd10d0b3673e2786b2794492cf23716_rep;size=6340;	k__Bacteria	p__Proteobacteria	c__Alphaproteobacteria	o__Sphingomonadales	f__Sphingomonadaceae	g__Sphingomonas	g__Sphingomonas	201	6	1	8	12	52	0	2	31	3	654	0	0	17	0	14	45	2	3	0	128	0	3	5	13	23	1	75	7	0	46	20	33	2	15	139	49	1	62	30	2	12
d2ec35c801358dc8c4298cf0c57838de_rep;size=6281;	k__Bacteria	p__Proteobacteria	c__Gammaproteobacteria	o__Betaproteobacteriales	f__Burkholderiaceae	g__Variovorax	Ambiguous_taxa	26	120	3	24	6	24	6	3	87	3	239	7	0	4	0	22	145	7	19	641	107	14	2	16	127	26	5	23	54	6	2	27	87	2	23	90	21	2	26	21	1	5
e6f898e7805337fb1c32e057662dad1b_rep;size=6255;	k__Bacteria	p__Proteobacteria	c__Gammaproteobacteria	o__Diplorickettsiales	f__Diplorickettsiaceae	g__Rickettsiella	Ambiguous_taxa	5	0	1	0	69	1	0	0	0	98	0	5	0	2	0	1	0	10	1	0	2	0	23	1	56	15	4	44	68	42	4	0	137	59	17	320	11	22	1	0	1	4
ec098ad12ef2923b449a01762462578b_rep;size=6231;	k__Bacteria	p__Firmicutes	c__Bacilli	o__Lactobacillales	f__Streptococcaceae	g__Lactococcus	s__uncultured bacterium	0	0	1	337	0	0	0	3	4	2	0	9	0	0	0	0	0	0	0	0	1	0	551	0	7	1	0	2	1	0	1	0	4526	20	0	0	7	1	22	1	0	0
99b4b08d63c3459f7ad9f4a23395d664_rep;size=6165;	k__Bacteria	p__Proteobacteria	c__Gammaproteobacteria	o__Enterobacteriales	f__Enterobacteriaceae	f__Enterobacteriaceae	f__Enterobacteriaceae	282	0	147	79	6	0	0	8	754	0	0	8	0	27	1	1	2	6	0	0	5	0	7	9	17	1	0	6	3	145	1	1	8	1	2	1	6	0	55	1	1	6
2239f3ab9cff06eb1f966fd0413a154e_rep;size=6075;	k__Bacteria	p__Proteobacteria	c__Gammaproteobacteria	o__Betaproteobacteriales	f__Burkholderiaceae	f__Burkholderiaceae	f__Burkholderiaceae	7	3	1	146	14	51	9	12	174	4	78	2	0	15	1	117	25	4	444	2	81	15	13	1	7	7	3	30	13	6	3	2	107	12	7	222	24	1	2	54	2	15
658507aedff08cc3fabea6f053f5a810_rep;size=5877;	k__Bacteria	p__Proteobacteria	c__Alphaproteobacteria	o__Acetobacterales	f__Acetobacteraceae	g__Roseomonas	Ambiguous_taxa	81	0	17	25	11	5	49	74	3	0	0	16	21	57	0	61	10	68	1	0	12	35	43	34	6	59	15	102	47	3	96	2	20	3	169	37	17	15	9	128	43	86
c802209e839326c42972825c8cf54d8b_rep;size=5859;	k__Bacteria	p__Actinobacteria	c__Actinobacteria	o__Micrococcales	f__Micrococcaceae	g__Kocuria	g__Kocuria	26	4	27	2	14	1	33	64	2	2	0	104	238	168	0	103	15	111	2	0	2	41	36	34	6	259	55	57	23	6	51	1	74	8	151	202	26	22	54	56	239	119
d2c679da10627147f8394ee8ae0f3e65_rep;size=5858;	k__Bacteria	p__Proteobacteria	c__Alphaproteobacteria	o__Rhizobiales	f__Beijerinckiaceae	g__Methylobacterium	Ambiguous_taxa	0	0	0	3	0	36	1	0	9	2146	26	0	0	0	41	0	0	0	77	2	6	0	4	0	3	1	2	1	2	1	0	0	0	5	0	2	1	1	0	1	0	0
02c1416acb2fe6e000a0eb43968107a4_rep;size=5781;	k__Bacteria	p__Proteobacteria	c__Gammaproteobacteria	o__Enterobacteriales	f__Enterobacteriaceae	g__Yersinia	g__Yersinia	0	0	0	0	5	0	0	0	2999	0	0	0	0	0	0	0	0	0	1	0	0	0	0	0	0	0	0	0	0	2	1	0	0	0	0	0	0	0	1	0	0	0
b987c730415bcfd0088e6c0356998bf5_rep;size=5702;	Unassigned	Unassigned	Unassigned	Unassigned	Unassigned	Unassigned	Unassigned	119	0	4	1	25	0	60	74	1	1	0	23	0	351	0	682	2	96	0	1	1	16	66	12	13	59	18	25	16	55	199	0	36	38	37	16	12	7	31	176	170	45
4a7f867d55034fd3b2b4b28e0b1dda36_rep;size=5620;	k__Bacteria	p__Actinobacteria	c__Actinobacteria	o__Corynebacteriales	f__Nocardiaceae	g__Rhodococcus	g__Rhodococcus	1	3	0	3	5	13	0	1	6	6	0	8	0	1	0	0	2	2	1	1	0	0	63	0	1	6	0	4	2	1045	78	1	3	1555	1	42	0	0	1987	0	6	1
8b9333a26df47785ce683a71dac0e96d_rep;size=5589;	k__Bacteria	p__Actinobacteria	c__Actinobacteria	o__Micrococcales	f__Dermabacteraceae	g__Brachybacterium	Ambiguous_taxa	43	0	9	3	15	1	91	166	1	0	0	50	0	186	2	199	5	142	2	0	0	61	35	20	13	49	36	21	72	9	36	1	33	2	40	12	11	37	66	366	320	53
311f90294910159ccbe581e11ef3eba8_rep;size=5566;	k__Bacteria	p__Proteobacteria	c__Alphaproteobacteria	o__Rhodobacterales	f__Rhodobacteraceae	g__Paracoccus	g__Paracoccus	951	0	16	8	15	3	86	61	1	2	3	7	0	81	0	14	16	47	3	0	3	42	10	29	18	11	26	108	59	2	190	8	19	1	51	62	54	5	19	26	110	90
0f762e7a14de70b9893f8480738dac48_rep;size=5543;	k__Bacteria	p__Firmicutes	c__Bacilli	o__Lactobacillales	f__Enterococcaceae	g__Enterococcus	g__Enterococcus	3	0	0	69	1	0	0	0	29	1	0	26	0	1	23	0	0	9	0	9	2	0	1	0	7	2	3	3	0	28	2	0	0	2	5	3	0	0	3	2	1	3
d264e9bc6c8433766a6155af68d1245b_rep;size=5424;	k__Bacteria	p__Firmicutes	c__Bacilli	o__Lactobacillales	f__Streptococcaceae	g__Streptococcus	s__uncultured bacterium	0	0	1	1	2	0	0	0	0	0	0	0	0	1	0	0	0	2	0	0	0	0	1	0	1	1	4	2	0	0	0	0	2	0	0	0	2	1	0	0	0	4
c4454948f9f7813dbca603989a27bbd6_rep;size=5415;	k__Bacteria	p__Proteobacteria	c__Alphaproteobacteria	o__Acetobacterales	f__Acetobacteraceae	f__Acetobacteraceae	f__Acetobacteraceae	0	0	0	0	0	0	0	0	1	0	0	0	2	0	0	0	0	0	0	0	0	0	0	0	0	0	0	21	0	0	0	0	0	3	5	0	0	0	0	0	0	0
52ec97b3f172a4212493adf8787a20ec_rep;size=5298;	k__Bacteria	p__Proteobacteria	c__Alphaproteobacteria	o__Caulobacterales	f__Caulobacteraceae	g__Brevundimonas	Ambiguous_taxa	36	184	11	73	5	38	1	6	29	1	0	1	19	5	0	5	245	21	8	0	9	15	713	6	7	1	3	31	279	5	3	10	23	3	6	21	5	0	266	119	6	14
22ddbb0256cb15d619b41361671bc03b_rep;size=5265;	Unassigned	Unassigned	Unassigned	Unassigned	Unassigned	Unassigned	Unassigned	0	0	0	0	0	15	0	0	1	1555	2	0	0	0	15	1	0	0	44	0	0	0	2	0	1	0	0	2	3	0	0	0	1	2	0	0	0	2	0	0	0	0
5fa11e22dbe7c8efe86acc3d4561a10a_rep;size=5263;	k__Bacteria	p__Proteobacteria	c__Alphaproteobacteria	o__Sphingomonadales	f__Sphingomonadaceae	g__Sphingomonas	g__Sphingomonas	3	0	1	20	2	24	1	0	1	2	1048	0	2	2	339	8	3	6	637	3	138	0	5	2	7	1	1	3	35	41	0	0	119	118	3	14	3	4	19	10	3	0
e9c628ecee156be5446a67c8621101bc_rep;size=5074;	k__Bacteria	p__Proteobacteria	c__Alphaproteobacteria	o__Caulobacterales	f__Caulobacteraceae	g__Brevundimonas	g__Brevundimonas	17	63	5	19	1	19	7	7	73	0	2	0	3	1	4	3	89	3	1	104	10	27	29	6	11	3	3	8	324	24	3	9	5	45	2	62	0	0	19	15	1	7
7e537c12b9af4d0e06d9c229f25d2176_rep;size=4795;	k__Bacteria	p__Proteobacteria	c__Gammaproteobacteria	o__Betaproteobacteriales	f__Burkholderiaceae	g__Delftia	g__Delftia	0	4	0	10	0	4	0	0	22	0	1	0	0	0	2	1	20	1	1	61	0	0	0	5	1	0	0	0	0	39	0	1	18	20	1	0	0	3	3	3	0	0
d21fb7a17167fb6c5525a0868a18d3a3_rep;size=4770;	k__Bacteria	p__Proteobacteria	c__Alphaproteobacteria	o__Sphingomonadales	f__Sphingomonadaceae	g__Sphingomonas	Ambiguous_taxa	36	0	0	4	0	62	0	1	30	11	399	0	0	1	35	36	4	1	192	1	734	0	9	2	13	0	1	46	3	1	2	1	58	0	3	33	30	0	1	23	1	2
399ef1f33dc84ed084539e5c5a70c85e_rep;size=4657;	k__Bacteria	p__Proteobacteria	c__Alphaproteobacteria	o__Rhodobacterales	f__Rhodobacteraceae	g__Amaricoccus	Ambiguous_taxa	46	8	38	18	28	2	21	104	1	0	0	13	0	30	0	45	0	41	1	3	1	32	20	8	7	6	57	56	302	0	103	23	6	19	39	54	11	3	30	132	37	75
7e675b477e5112e1e6d8a39da54ee564_rep;size=4584;	k__Bacteria	p__Proteobacteria	c__Alphaproteobacteria	o__Rhodobacterales	f__Rhodobacteraceae	f__Rhodobacteraceae	f__Rhodobacteraceae	70	0	51	6	20	0	32	90	2	1	0	30	0	46	1	13	2	65	1	0	0	34	1	0	9	8	87	114	215	4	318	64	16	8	74	120	61	2	13	125	54	137
87f0b37a85f787c96f45695e782f92a4_rep;size=4565;	k__Bacteria	p__Proteobacteria	c__Alphaproteobacteria	o__Rhizobiales	f__Rhizobiaceae	g__Allorhizobium-Neorhizobium-Pararhizobium-Rhizobium	g__Allorhizobium-Neorhizobium-Pararhizobium-Rhizobium	75	25	11	11	15	2	3	22	0	3	1	6	4	52	0	4	332	10	2	5	0	19	17	121	14	48	10	54	182	1	110	9	5	6	57	7	29	2	38	22	12	32
8fabcca9c8705820934b0e31b72b7128_rep;size=4431;	Unassigned	Unassigned	Unassigned	Unassigned	Unassigned	Unassigned	Unassigned	77	1	2	7	2	2	11	18	1	0	12	0	0	3	3	69	5	5	4	1	6	4	6	0	13	7	8	143	17	0	8	2	16	3	32	111	138	0	0	210	2	18
a7f255d2b695a23fa0d29c73b829306e_rep;size=4392;	k__Bacteria	p__Proteobacteria	c__Alphaproteobacteria	o__Sphingomonadales	f__Sphingomonadaceae	g__Sphingomonas	g__Sphingomonas	0	329	1	29	0	203	4	1	6	0	60	1	0	0	70	6	27	0	4	120	42	1	0	7	2	0	0	4	62	8	0	2	4	8	2	33	2	0	16	5	1	2
9f68519d63d6a186a74bd698d14df342_rep;size=4291;	k__Bacteria	p__Proteobacteria	c__Alphaproteobacteria	o__Sphingomonadales	f__Sphingomonadaceae	g__Sphingobium	Ambiguous_taxa	24	65	2	0	0	29	0	18	3	0	38	0	24	7	1	10	497	7	0	1	21	8	13	268	14	21	2	11	232	1	37	21	3	5	32	33	21	6	6	4	6	25
6f3c989491b25f70ae1e1b73b458ec7f_rep;size=4261;	k__Bacteria	p__Actinobacteria	c__Actinobacteria	o__Micrococcales	f__Microbacteriaceae	f__Microbacteriaceae	f__Microbacteriaceae	5	351	2	95	3	14	0	1	27	0	10	9	0	0	1	0	41	7	4	44	6	0	13	1	17	4	0	1	105	43	13	18	9	70	3	10	0	3	439	0	2	1
08813274a8cf340a7c7f6ec5f94713d3_rep;size=4217;	k__Bacteria	p__Proteobacteria	c__Alphaproteobacteria	o__Sphingomonadales	f__Sphingomonadaceae	g__Sphingomonas	g__Sphingomonas	40	5	0	12	1	64	0	0	119	12	350	1	0	0	1	20	6	1	262	0	423	0	10	0	17	2	0	54	4	1	4	0	67	4	1	29	49	1	1	15	3	1
c1555999f98d77d156ee7d3e57066ad4_rep;size=4118;	k__Bacteria	p__Proteobacteria	c__Alphaproteobacteria	o__Sphingomonadales	f__Sphingomonadaceae	g__Sphingomonas	g__Sphingomonas	36	3	0	8	1	39	0	1	35	4	388	0	0	0	5	36	4	1	104	1	569	0	5	0	19	0	1	52	2	1	0	1	52	1	1	26	39	0	1	21	2	1
73d7d68768eefc6be5beb95bf83dce24_rep;size=4109;	k__Bacteria	p__Proteobacteria	c__Alphaproteobacteria	o__Acetobacterales	f__Acetobacteraceae	g__Gluconobacter	g__Gluconobacter	0	0	0	0	0	0	0	0	0	0	0	1	0	0	0	0	0	1	0	0	0	0	0	0	0	0	0	0	0	0	0	0	0	0	0	0	0	3	0	0	0	0
34340b0af4987f66d689f43e8d1a0b38_rep;size=4097;	k__Bacteria	p__Proteobacteria	c__Alphaproteobacteria	o__Rhodospirillales	f__Magnetospirillaceae	f__Magnetospirillaceae	f__Magnetospirillaceae	0	0	0	2	0	0	0	0	0	0	0	0	0	0	0	0	0	0	0	1046	0	0	0	0	0	0	1	0	0	4	0	0	0	0	0	0	0	0	0	0	0	0
e9f4fd57359a65a6c67df71527510c67_rep;size=4005;	k__Bacteria	p__Actinobacteria	c__Actinobacteria	o__Micrococcales	f__Micrococcaceae	g__Kocuria	g__Kocuria	48	0	8	13	0	0	18	49	0	3	2	18	1	39	0	32	5	38	0	0	1	56	15	6	23	80	28	98	29	0	6	0	46	0	85	40	71	7	2	24	76	42
477f8ef900b4f12702ed8555b8e67070_rep;size=3948;	k__Bacteria	p__Proteobacteria	c__Gammaproteobacteria	o__Betaproteobacteriales	f__Burkholderiaceae	g__Massilia	Ambiguous_taxa	16	1	21	26	7	2	9	5	0	6	30	6	0	8	0	50	45	5	392	1	30	8	32	0	26	2	7	34	4	3	0	6	96	15	2	8	10	10	10	50	5	15
693facf0e941bc3c1fd9fec16237dc8a_rep;size=3878;	k__Bacteria	p__Proteobacteria	c__Alphaproteobacteria	o__Acetobacterales	f__Acetobacteraceae	f__Acetobacteraceae	f__Acetobacteraceae	0	0	0	0	0	0	0	0	0	0	0	0	0	0	0	0	0	0	0	0	0	0	4	0	0	2	0	7	1	0	0	0	1	0	1	0	0	58	0	0	0	0
ba2c4a61c96219ce0880164d0e93e7b3_rep;size=3833;	k__Bacteria	p__Actinobacteria	c__Actinobacteria	o__Micrococcales	o__Micrococcales	o__Micrococcales	o__Micrococcales	0	0	0	1	3	7	5	0	0	6	0	1	0	1	0	1	0	5	0	0	0	0	0	0	0	0	1	0	0	1740	2	0	0	1463	1	40	0	0	157	0	0	0
0b0a0672ad4cd5e656cf2598c1c48999_rep;size=3817;	k__Bacteria	p__Proteobacteria	c__Alphaproteobacteria	o__Rhizobiales	f__Xanthobacteraceae	f__Xanthobacteraceae	f__Xanthobacteraceae	0	178	0	21	0	0	0	1	0	0	0	2	0	1	1	0	0	0	0	5	0	3	2	2	5	0	0	0	257	0	66	16	5	1	0	0	1	0	18	1	6	0
fcd9c1f3125113e51cbdf952a0ba49bf_rep;size=3801;	k__Bacteria	p__Actinobacteria	c__Actinobacteria	o__Micrococcales	f__Micrococcaceae	g__Kocuria	g__Kocuria	2	0	6	4	142	0	6	15	2	1	0	47	0	142	1	70	0	129	0	0	0	54	21	0	4	45	26	11	26	2	1	0	6	1	8	48	1	0	3	601	20	47
c081c63688123356f5b6b9e4fe5fd9b4_rep;size=3723;	Unassigned	Unassigned	Unassigned	Unassigned	Unassigned	Unassigned	Unassigned	0	0	0	3378	0	0	2	0	2	0	0	0	0	1	0	1	2	3	0	3	0	6	20	0	0	4	0	0	0	0	6	2	0	0	10	3	0	1	0	3	14	6
3c9223e6e9fe78837fd39864dfda9596_rep;size=3707;	Unassigned	Unassigned	Unassigned	Unassigned	Unassigned	Unassigned	Unassigned	0	0	0	0	0	9	31	0	0	1	0	0	0	0	0	1	0	2	1	0	0	0	0	0	0	0	0	0	0	2414	0	0	1	945	0	48	1	0	1	0	1	0
4adeb7bc59573887de5df3285c6fb0d2_rep;size=3660;	k__Bacteria	p__Actinobacteria	c__Actinobacteria	o__Micrococcales	f__Micrococcaceae	f__Micrococcaceae	f__Micrococcaceae	4	1	85	0	0	2	296	23	0	0	0	140	37	26	2	1	15	37	0	0	0	110	1	24	1	7	382	1	5	749	51	27	0	275	1	2	1	1	10	8	301	18
acaf2801ed6bff0f1bb65d0f0c080b89_rep;size=3651;	k__Bacteria	p__Actinobacteria	c__Actinobacteria	o__Micrococcales	f__Micrococcaceae	f__Micrococcaceae	f__Micrococcaceae	15	0	3	1	9	0	26	19	0	0	1	8	0	41	0	80	0	6	0	0	2	23	7	0	14	95	9	84	8	1	2	0	34	0	78	10	41	6	0	22	34	10
4a7ae8b213e4300f9635053feaad828b_rep;size=3618;	k__Bacteria	p__Proteobacteria	c__Alphaproteobacteria	o__Sphingomonadales	f__Sphingomonadaceae	g__Sphingomonas	Ambiguous_taxa	1	0	0	9	2	325	0	0	3	117	693	0	0	0	390	5	0	0	146	19	42	0	2	0	4	0	0	5	8	0	0	2	5	11	1	6	4	1	1	17	1	2
32b1e8476d776b3e6fe3ce7fda55a4eb_rep;size=3606;	k__Bacteria	p__Cyanobacteria	c__Oxyphotobacteria	o__Nostocales	f__Chroococcidiopsaceae	g__Aliterella CENA595	Ambiguous_taxa	36	0	0	0	23	5	4	1	15	21	0	0	0	17	0	8	0	20	0	0	5	0	2	0	106	0	2	62	9	20	0	0	44	0	5	3	32	2	11	21	0	13
bb193f269b6b074b23b84b5605f78380_rep;size=3532;	k__Bacteria	p__Actinobacteria	c__Actinobacteria	o__Micrococcales	f__Cellulomonadaceae	Ambiguous_taxa	Ambiguous_taxa	127	0	1	15	9	3	0	2	0	0	4	5	2	9	0	41	1	37	3	1	7	5	48	3	27	30	7	65	26	0	8	5	37	3	23	73	47	5	14	33	32	12
66485604695867614b209d02a6e547fb_rep;size=3525;	k__Bacteria	p__Proteobacteria	c__Alphaproteobacteria	o__Sphingomonadales	f__Sphingomonadaceae	g__Sphingomonas	g__Sphingomonas	111	4	5	15	0	0	1	14	9	0	7	0	0	2	0	48	2	5	10	0	28	6	6	0	17	4	20	101	16	1	17	2	60	1	11	125	115	0	2	29	6	7
546f2728bd89c8f087f9c7a94cd3ed23_rep;size=3522;	k__Bacteria	p__Proteobacteria	c__Alphaproteobacteria	o__Caulobacterales	f__Caulobacteraceae	g__Brevundimonas	g__Brevundimonas	50	12	0	41	0	297	0	0	6	0	32	0	43	1	147	8	149	0	34	5	59	0	2	42	8	1	2	13	21	1	6	7	9	6	4	22	17	1	0	12	0	0
9c8fe4f590ed08b997a8ca49bb3bb647_rep;size=3438;	k__Bacteria	p__Actinobacteria	c__Actinobacteria	o__Corynebacteriales	f__Nocardiaceae	g__Rhodococcus	g__Rhodococcus	3	60	0	30	13	3	17	2	3	1	8	11	0	7	1	0	47	3	12	7	16	1	40	0	4	6	1	2	6	197	14	1	12	57	3	102	0	4	549	1	6	4
8d5271905ebe14e79618044b88ce69fc_rep;size=3400;	k__Bacteria	p__Actinobacteria	c__Actinobacteria	o__Micrococcales	o__Micrococcales	o__Micrococcales	o__Micrococcales	0	2	0	11	5	16	0	7	1	1	0	365	0	12	0	3	0	2	1	119	1	3	0	1	1	2	2	1	10	0	45	1	0	14	11	3	0	11	2	0	6	1
9028791cd01274c078703887a679794a_rep;size=3386;	k__Bacteria	p__Proteobacteria	c__Alphaproteobacteria	o__Sphingomonadales	f__Sphingomonadaceae	g__Sphingomonas	g__Sphingomonas	5	4	3	9	5	3	18	2	0	0	7	2	0	1	0	1	1	1	1	0	12	4	4	0	3	7	4	107	8	30	3	3	4	27	56	377	57	0	5	3	6	10
99ae2485c5716cba8bab9f8995143e09_rep;size=3323;	k__Bacteria	p__Proteobacteria	c__Alphaproteobacteria	o__Sphingomonadales	f__Sphingomonadaceae	g__Novosphingobium	g__Novosphingobium	28	7	6	27	2	67	10	3	1	0	68	1	0	5	0	27	34	9	5	23	1001	3	7	40	13	1	0	14	19	5	3	4	21	2	3	13	15	1	3	11	0	11
0438727d14faa195fb958ec77056c88d_rep;size=3321;	k__Bacteria	p__Bacteroidetes	c__Bacteroidia	o__Flavobacteriales	f__Flavobacteriaceae	g__Flavobacterium	g__Flavobacterium	0	1034	12	22	2	0	2	9	0	0	0	57	0	1	0	5	25	9	0	401	0	56	4	4	1	1	11	0	6	1	6	8	0	19	4	7	0	0	0	1	0	5
ec771624d26e3950afc31a35fbd1503e_rep;size=3303;	k__Bacteria	p__Proteobacteria	c__Gammaproteobacteria	o__Betaproteobacteriales	f__Burkholderiaceae	g__Massilia	Ambiguous_taxa	17	0	1	32	2	2	6	9	2	1	7	2	0	18	0	23	447	10	53	0	46	4	1	2	19	0	5	25	5	1	3	2	81	0	8	6	13	13	315	83	7	25
ca7b52ebcd980ca120e3e0a8a9c1dc23_rep;size=3277;	k__Bacteria	p__Proteobacteria	c__Alphaproteobacteria	o__Acetobacterales	f__Acetobacteraceae	g__Craurococcus	s__uncultured bacterium	13	0	1	0	106	0	21	6	23	16	2	16	0	40	0	4	0	40	1	0	11	0	16	0	134	0	15	80	4	6	2	0	68	1	0	4	33	0	18	12	2	2
fa6c5773f966f19e23dca5a88f8fe5d2_rep;size=3242;	k__Bacteria	p__Actinobacteria	c__Actinobacteria	o__Micrococcales	f__Microbacteriaceae	f__Microbacteriaceae	f__Microbacteriaceae	10	13	0	100	7	0	2	0	26	0	22	2	0	2	0	4	0	7	33	28	25	2	39	0	5	6	2	7	64	8	0	2	5	33	7	61	3	9	3	3	6	1
d1364b7829971a857029a41ae7d003e7_rep;size=3235;	k__Bacteria	p__Proteobacteria	c__Alphaproteobacteria	o__Sphingomonadales	f__Sphingomonadaceae	g__Sphingomonas	g__Sphingomonas	19	4	0	6	1	41	0	0	7	0	101	0	0	0	1	0	8	0	308	0	158	0	8	1	17	0	0	67	5	2	2	0	42	1	5	23	60	0	2	1	6	2
5497318e515a8c328a68f95975d9c7d4_rep;size=3180;	k__Bacteria	p__Firmicutes	c__Bacilli	o__Bacillales	f__Staphylococcaceae	g__Staphylococcus	g__Staphylococcus	0	0	0	0	2	0	0	0	0	0	1	2	0	5	0	0	0	6	0	0	0	0	3	2	2	1	0	13	1	0	0	0	4	0	4	5	2	1	1	0	1	0
76af669394c1acfe79aefcf8b71b9c7f_rep;size=3162;	k__Bacteria	p__Deinococcus-Thermus	c__Deinococci	o__Deinococcales	f__Trueperaceae	g__Truepera	g__Truepera	14	0	3	2	7	0	60	13	0	0	0	0	0	9	0	22	0	4	4	0	0	0	0	0	7	7	3	183	1	0	49	0	22	4	25	39	236	2	0	63	3	40
ecc8367537453bf22a466def66e8684f_rep;size=3152;	k__Bacteria	p__Actinobacteria	c__Actinobacteria	o__Micrococcales	f__Brevibacteriaceae	g__Brevibacterium	Ambiguous_taxa	0	0	20	7	30	0	6	50	1	0	1	128	0	45	0	31	0	46	0	0	0	106	24	11	0	76	125	34	15	46	10	0	7	33	77	11	4	40	6	15	33	125
a967f6b6f57407a9afba49e8123d9af3_rep;size=3143;	k__Bacteria	p__Proteobacteria	c__Alphaproteobacteria	o__Rhizobiales	f__Beijerinckiaceae	g__Methylobacterium	g__Methylobacterium	2	0	0	0	2	4	1	0	0	1035	1	0	0	0	12	1	0	0	27	0	2	0	1	0	1	0	0	0	0	1	0	0	0	0	0	0	0	0	0	1	0	0
ed43701fc8bdfb6b0c0f42d2b507f75f_rep;size=3121;	Unassigned	Unassigned	Unassigned	Unassigned	Unassigned	Unassigned	Unassigned	21	0	0	0	45	0	16	13	3	25	0	2	0	27	0	18	0	12	1	0	4	0	7	0	30	1	11	115	12	13	1	0	137	0	1	7	53	1	4	18	0	7
cfa6e473a0198e54729b5c596288d972_rep;size=3077;	k__Bacteria	p__Firmicutes	c__Clostridia	o__Clostridiales	f__Peptostreptococcaceae	g__Clostridioides	Ambiguous_taxa	0	0	1	0	3	3	0	0	22	0	0	3	0	5	2823	0	0	6	2	4	0	0	8	0	0	0	0	1	0	11	0	2	4	39	0	1	0	1	0	0	0	0
05bbc7e8929ddc48ef115dd228b59a0a_rep;size=3052;	k__Bacteria	p__Firmicutes	c__Bacilli	o__Bacillales	f__Planococcaceae	g__Planococcus	g__Planococcus	1	0	334	0	2	0	0	130	0	0	0	24	0	7	0	1	5	9	0	0	0	733	0	1	0	0	1162	7	2	0	0	0	4	0	0	54	2	0	2	4	1	97
9b976e6697bdefff1c5d0f6d4a4c521a_rep;size=3039;	k__Bacteria	p__Actinobacteria	c__Actinobacteria	o__Micrococcales	Ambiguous_taxa	Ambiguous_taxa	Ambiguous_taxa	211	3	40	6	2	3	7	44	0	3	1	46	190	18	0	2	13	89	0	0	1	63	14	39	14	15	96	45	14	2	53	6	3	7	35	19	42	17	23	3	40	79
b91332e18dfc35c8006c31269a718a9a_rep;size=3034;	k__Bacteria	p__Actinobacteria	c__Actinobacteria	o__Micrococcales	f__Dermabacteraceae	g__Brachybacterium	Ambiguous_taxa	2	0	2	0	18	4	22	23	0	0	1	41	0	32	3	55	4	23	0	0	0	19	13	0	8	18	19	26	24	7	6	0	6	5	44	15	4	30	5	4	27	17
d7eb6ac2b16ff5bc9540b66ee4fcf1ce_rep;size=3029;	k__Bacteria	p__Proteobacteria	c__Alphaproteobacteria	o__Caulobacterales	f__Caulobacteraceae	g__Brevundimonas	g__Brevundimonas	6	22	2	3	3	12	0	5	0	0	0	0	0	0	4	1	268	1	0	2	50	23	4	0	2	2	2	1	125	17	8	2	0	27	0	17	38	0	21	1	0	1
0bba8ade89a48375747caf3e82a4b020_rep;size=2998;	k__Bacteria	p__Actinobacteria	c__Actinobacteria	o__Micrococcales	f__Microbacteriaceae	g__Gulosibacter	g__Gulosibacter	152	8	41	19	4	3	10	34	1	0	0	51	191	15	0	2	14	46	0	0	0	63	29	60	21	23	96	48	23	6	44	0	13	1	28	34	26	8	38	11	27	99
b6d3b72c617ee9fa02e387b2bbf9c388_rep;size=2997;	k__Bacteria	p__Actinobacteria	c__Actinobacteria	o__Micrococcales	f__Micrococcaceae	g__Nesterenkonia	Ambiguous_taxa	0	0	41	0	0	2	143	25	0	0	0	48	134	11	0	0	6	14	0	0	0	5	2	14	0	2	175	0	0	1101	7	8	0	178	2	0	0	1	0	4	141	17
64d56fd1790d592920644b63d612a5a0_rep;size=2979;	Unassigned	Unassigned	Unassigned	Unassigned	Unassigned	Unassigned	Unassigned	79	1	0	0	0	0	0	0	3	31	314	0	0	0	0	0	1	0	148	0	576	0	0	0	33	0	0	13	0	1	0	6	41	1	0	0	45	0	1	0	0	0
dea3de5f98cf303eed13a67652c8d888_rep;size=2961;	k__Bacteria	p__Actinobacteria	c__Actinobacteria	o__Micrococcales	f__Micrococcaceae	f__Micrococcaceae	f__Micrococcaceae	2	7	223	0	0	2	21	114	0	0	0	178	10	15	0	1	21	52	0	0	0	255	1	59	0	6	783	2	12	5	47	3	0	9	2	27	1	5	4	15	54	113
3fa01f0fe723073fb3a1f9732b1404b9_rep;size=2945;	Unassigned	Unassigned	Unassigned	Unassigned	Unassigned	Unassigned	Unassigned	18	0	10	15	20	0	37	35	0	0	1	86	1	97	0	3	5	173	5	0	0	26	30	7	3	149	38	8	36	6	39	0	8	27	168	17	3	91	18	19	42	56
bcae8f7d2c42acfe3559c665f68f6320_rep;size=2892;	k__Bacteria	p__Proteobacteria	c__Gammaproteobacteria	o__Pseudomonadales	f__Moraxellaceae	g__Acinetobacter	g__Acinetobacter	0	0	1	74	0	0	0	1	4	0	0	7	1	0	9	14	931	2	0	0	0	0	1020	3	1	26	1	8	0	0	0	0	195	0	103	14	1	2	0	1	0	0
5168b870d94d1554d2c09502e9cb704e_rep;size=2885;	k__Bacteria	p__Proteobacteria	c__Alphaproteobacteria	o__Rhizobiales	f__Beijerinckiaceae	g__uncultured	g__uncultured	0	41	0	0	0	0	0	0	5	0	0	0	0	0	0	0	0	0	0	0	0	0	0	0	0	3	0	0	214	0	0	0	0	1	0	0	0	0	0	0	0	0
c2b3711eb953604a96be0c766112f23f_rep;size=2884;	Unassigned	Unassigned	Unassigned	Unassigned	Unassigned	Unassigned	Unassigned	5	0	0	2	0	210	0	0	10	292	382	1	0	0	114	3	2	0	145	2	33	0	17	0	4	0	2	3	2	1	0	0	1	2	0	4	0	5	0	17	0	0
c527ec6146a3e16bad25ff5f05466190_rep;size=2881;	k__Bacteria	p__Proteobacteria	c__Alphaproteobacteria	o__Sphingomonadales	f__Sphingomonadaceae	g__Sphingomonas	Ambiguous_taxa	13	4	0	11	0	38	0	0	9	1	118	0	0	0	39	5	7	1	253	0	136	0	7	0	13	1	1	71	3	0	4	1	43	5	2	21	66	2	1	7	2	0
2f517238f5e9968e4a8774d4648011df_rep;size=2872;	k__Bacteria	p__Deinococcus-Thermus	c__Deinococci	o__Deinococcales	f__Trueperaceae	g__Truepera	g__Truepera	22	0	0	0	25	1	4	4	6	12	2	0	0	23	0	27	0	3	1	0	6	0	5	1	34	0	0	157	6	2	0	0	27	0	0	1	191	0	0	17	1	7
26d627f560640b6e692122b7cb6f3d60_rep;size=2860;	k__Bacteria	p__Proteobacteria	c__Alphaproteobacteria	o__Rhodobacterales	f__Rhodobacteraceae	f__Rhodobacteraceae	f__Rhodobacteraceae	1	184	5	35	1	0	1	25	3	0	0	6	0	4	0	2	2	12	0	169	2	44	6	354	1	9	21	1	175	1	10	7	0	1	36	22	2	1	0	0	1	21
4828d589883749cf884a105bef7388bc_rep;size=2837;	k__Bacteria	p__Firmicutes	c__Bacilli	o__Bacillales	f__Bacillaceae	g__Bacillus	Ambiguous_taxa	25	2	1	2	25	2	7	1	12	4	0	18	0	6	0	1	0	5	1	0	23	0	9	0	13	0	6	1178	3	61	19	77	41	23	2	4	21	0	2	1	39	2
2ed7a52a7beaf009a47e210f757d994c_rep;size=2818;	k__Bacteria	p__Deinococcus-Thermus	c__Deinococci	o__Deinococcales	f__Trueperaceae	g__Truepera	g__Truepera	128	0	23	0	3	0	32	19	2	0	4	1	0	33	0	104	1	9	2	0	0	9	10	7	2	12	4	87	32	0	82	0	5	1	28	30	80	0	0	104	10	63
c41af3ba7aeabdb1886cf01eddb79139_rep;size=2805;	k__Bacteria	p__Proteobacteria	c__Alphaproteobacteria	o__Sphingomonadales	f__Sphingomonadaceae	g__Sphingobium	g__Sphingobium	40	10	0	0	0	86	2	1	0	3	16	0	0	8	0	16	478	2	0	92	10	1	5	303	7	1	2	1	223	0	16	12	1	2	10	3	2	1	23	3	7	5
4b836f63cdc6014c6fb56004f87afbb1_rep;size=2779;	k__Bacteria	p__Actinobacteria	c__Actinobacteria	o__Micrococcales	f__Micrococcaceae	g__Kocuria	g__Kocuria	5	1	2	0	4	0	19	14	0	0	1	5	0	20	0	12	1	14	0	0	0	30	9	2	12	87	11	50	3	0	2	0	9	3	63	12	41	6	0	9	42	16
2d9c3b4de017ef3a0e576ce068dd8de8_rep;size=2762;	k__Bacteria	p__Proteobacteria	c__Alphaproteobacteria	o__Rhodobacterales	f__Rhodobacteraceae	g__Paracoccus	g__Paracoccus	0	0	2	0	4	0	100	3	0	1	0	10	0	4	0	1	0	30	1	0	0	4	0	3	3	0	20	731	0	3	11	11	5	3	0	21	1	0	0	0	4	11
09403870435de24e0d1079059a287957_rep;size=2731;	k__Bacteria	p__Actinobacteria	c__Actinobacteria	o__Micrococcales	f__Micrococcaceae	f__Micrococcaceae	f__Micrococcaceae	0	0	0	0	23	0	12	2	0	0	0	12	0	22	0	10	1	36	0	0	1	4	2	0	1	10	0	0	5	2	0	0	4	2	5	14	6	5	2	53	1	2
5b4d107e071c8fd2fada2be95796980a_rep;size=2674;	k__Bacteria	p__Proteobacteria	c__Alphaproteobacteria	o__Sphingomonadales	f__Sphingomonadaceae	g__Sphingomonas	Ambiguous_taxa	53	0	3	1	1	2	3	5	0	3	9	0	1	6	1	67	3	6	6	4	7	1	7	1	7	3	11	72	9	0	7	17	13	2	8	79	54	2	0	167	7	4
bff94e34a43754d6c7dddbb9308ff31b_rep;size=2623;	k__Bacteria	p__Actinobacteria	c__Actinobacteria	o__Micrococcales	f__Microbacteriaceae	f__Microbacteriaceae	f__Microbacteriaceae	31	0	1	46	51	1	0	6	1	1	4	7	0	7	0	7	1	18	6	0	1	2	52	5	5	15	0	29	11	5	5	3	14	2	5	52	9	1	8	19	16	4
87081189e3e991208f4491930a91ff59_rep;size=2602;	k__Bacteria	p__Proteobacteria	c__Alphaproteobacteria	o__Sphingomonadales	f__Sphingomonadaceae	g__Sphingomonas	g__Sphingomonas	1	0	1	9	4	0	1	0	0	0	173	1	0	0	1	0	0	0	0	25	4	0	0	1	6	1	0	1	133	8	0	3	1	2	0	9	0	0	0	0	0	11
f95109c5d61efa192d253af682ef41fb_rep;size=2541;	k__Bacteria	p__Bacteroidetes	c__Bacteroidia	o__Cytophagales	f__Hymenobacteraceae	g__Hymenobacter	s__uncultured bacterium	0	0	0	0	1	0	0	0	0	2291	0	0	0	0	0	0	0	0	0	0	0	0	0	0	0	0	0	0	0	0	0	0	0	0	0	0	0	0	0	0	0	0
69994423cd821c1f20e9529f6664d383_rep;size=2526;	k__Bacteria	p__Proteobacteria	c__Gammaproteobacteria	o__Betaproteobacteriales	f__Burkholderiaceae	g__Derxia	Ambiguous_taxa	0	1	0	0	0	0	0	0	0	0	0	0	0	0	0	0	0	0	0	159	0	0	0	3	2	0	0	1	115	0	0	0	1	0	0	0	0	0	0	1	0	0
b3d2f56bb8a8a87300df0a371bfc6613_rep;size=2524;	k__Bacteria	p__Proteobacteria	c__Alphaproteobacteria	o__Rhizobiales	f__Devosiaceae	g__Devosia	g__Devosia	0	58	2	33	0	2	5	0	5	0	5	1	0	8	56	1	2	2	2	130	0	28	3	0	3	2	5	4	2	0	24	8	1	4	6	9	0	0	2	1	4	10
c53a3a4ffda7180de3b2d34ec7841c28_rep;size=2521;	Unassigned	Unassigned	Unassigned	Unassigned	Unassigned	Unassigned	Unassigned	6	1	1	23	0	218	0	1	7	2	57	0	0	0	138	0	2	1	60	6	19	0	2	1	4	0	0	2	18	2	0	2	0	10	0	11	3	2	0	1	1	0
60f9f36e8f2d014b0754a40aae3ceace_rep;size=2518;	k__Bacteria	p__Proteobacteria	c__Gammaproteobacteria	o__Xanthomonadales	f__Xanthomonadaceae	g__Stenotrophomonas	g__Stenotrophomonas	2	46	0	22	0	29	1	1	2	0	0	3	131	5	0	2	23	4	0	57	2	5	2	29	17	2	2	117	165	3	15	59	108	9	4	19	3	3	12	4	3	3
b549aba01aa553bae8d8ccda9e4c9db8_rep;size=2504;	Unassigned	Unassigned	Unassigned	Unassigned	Unassigned	Unassigned	Unassigned	89	0	1	14	3	0	1	11	0	0	1	4	1	11	1	18	0	22	2	0	12	2	24	3	21	26	4	43	13	3	7	1	34	1	22	58	37	5	4	30	12	8
b1acdb8ebd62583ddbf1f8bb0398687d_rep;size=2497;	k__Bacteria	p__Actinobacteria	c__Actinobacteria	o__Micrococcales	f__Microbacteriaceae	g__Microbacterium	g__Microbacterium	8	31	3	54	5	7	5	2	4	0	3	69	55	16	0	0	5	50	0	1	5	8	109	8	3	25	3	4	46	19	17	5	5	143	28	54	2	24	23	5	28	9
44c9dd397d2f533e56ce70c66cec3048_rep;size=2487;	k__Bacteria	p__Actinobacteria	c__Actinobacteria	o__Micrococcales	f__Micrococcaceae	g__Kocuria	g__Kocuria	1	9	160	2	0	0	3	86	0	0	0	205	6	12	0	2	8	34	0	0	0	272	1	35	0	2	701	2	4	8	26	0	1	5	1	22	0	4	4	9	19	91
514202fc13c0bada84a67bde53d7bf01_rep;size=2479;	Unassigned	Unassigned	Unassigned	Unassigned	Unassigned	Unassigned	Unassigned	82	3	22	2	0	0	13	51	0	0	0	4	7	13	0	49	6	19	1	0	0	24	8	8	7	20	79	39	33	0	33	0	7	1	35	75	40	1	3	64	14	95
7ef342d97a469edd5979b788b95a44e6_rep;size=2461;	k__Bacteria	p__Proteobacteria	c__Alphaproteobacteria	o__Caulobacterales	f__Caulobacteraceae	g__Brevundimonas	g__Brevundimonas	3	19	1	29	1	38	5	1	0	0	0	4	0	1	0	1	409	2	0	1	9	5	11	49	7	3	0	2	66	16	1	34	4	6	4	105	3	0	589	3	1	0
5efbfc60ad3d1d88adb661baa34e5072_rep;size=2458;	Unassigned	Unassigned	Unassigned	Unassigned	Unassigned	Unassigned	Unassigned	37	3	0	19	1	95	0	0	31	0	35	0	0	0	79	4	48	0	72	3	147	0	1	11	6	1	0	20	35	0	6	2	15	2	0	30	15	0	2	13	2	0
3edd82710580dfebfb4e3b7e89f80549_rep;size=2445;	k__Bacteria	p__Actinobacteria	c__Actinobacteria	o__Micrococcales	Ambiguous_taxa	Ambiguous_taxa	Ambiguous_taxa	23	0	53	1	1	0	17	35	0	1	0	36	2	20	0	25	2	36	0	0	2	87	8	5	3	24	140	31	23	0	13	2	13	0	28	14	38	12	0	8	42	31
6555560bfd854f3afbdf0744a9209cc7_rep;size=2432;	Unassigned	Unassigned	Unassigned	Unassigned	Unassigned	Unassigned	Unassigned	0	6	1	5	0	16	2	0	3	1852	5	0	0	0	0	0	7	0	2	0	0	0	0	12	0	0	0	0	0	0	0	5	0	0	0	0	0	0	0	1	0	0
7aaac6cafec6b6c9e713aae1d048d906_rep;size=2429;	Unassigned	Unassigned	Unassigned	Unassigned	Unassigned	Unassigned	Unassigned	82	0	4	4	1	2	2	9	4	7	21	0	2	8	0	49	17	4	8	0	30	2	20	19	29	7	8	38	17	0	12	0	40	2	7	37	38	8	7	19	21	14
17594d4169af64de80b7df0519717106_rep;size=2417;	k__Bacteria	p__Proteobacteria	c__Alphaproteobacteria	o__Rhizobiales	f__Beijerinckiaceae	g__Methylobacterium	Ambiguous_taxa	0	0	0	0	0	5	0	0	0	651	6	0	0	1	14	0	0	0	50	1	1	0	2	0	0	0	0	0	1	0	0	0	0	0	0	0	0	0	0	2	0	0
ed6be6f35c692c6166ff8442f30ba282_rep;size=2402;	k__Bacteria	p__Proteobacteria	c__Alphaproteobacteria	o__Sphingomonadales	f__Sphingomonadaceae	g__Sphingobium	g__Sphingobium	2	70	0	47	0	102	2	1	2	0	11	5	19	1	8	1	298	0	2	17	6	5	8	108	31	3	3	1	48	7	22	2	10	3	3	12	3	2	4	0	2	10
7b8b846b12e927ca5663aa09b48a333b_rep;size=2393;	k__Bacteria	p__Proteobacteria	c__Alphaproteobacteria	o__Sphingomonadales	f__Sphingomonadaceae	g__Sphingomonas	Ambiguous_taxa	11	1	0	50	1	392	3	0	4	4	181	0	7	1	131	5	3	3	2	6	1	0	32	24	1	1	0	11	1	1	7	7	28	0	3	4	4	1	0	10	5	0
3e6ee8eb3eec142091386c646ef81639_rep;size=2342;	k__Bacteria	p__Proteobacteria	c__Alphaproteobacteria	o__Sphingomonadales	f__Sphingomonadaceae	g__Sphingomonas	g__Sphingomonas	0	0	0	1	0	9	0	0	0	493	1	0	0	0	2	0	0	0	0	0	2	0	0	1	0	0	0	0	4	0	0	0	0	4	0	0	0	0	0	0	0	0
a4fce24821541acfb866d3b6faa8e335_rep;size=2322;	k__Bacteria	p__Proteobacteria	c__Alphaproteobacteria	o__Sphingomonadales	f__Sphingomonadaceae	g__Sphingomonas	g__Sphingomonas	50	16	1	27	0	53	0	1	74	0	28	0	0	0	3	1	35	1	126	1	262	0	5	1	9	0	0	22	13	3	1	5	43	2	1	29	28	0	5	2	9	3
90e84003348b318a04013d139b808a9a_rep;size=2314;	Unassigned	Unassigned	Unassigned	Unassigned	Unassigned	Unassigned	Unassigned	0	0	0	0	0	0	0	0	0	0	0	0	2	0	0	0	2304	0	0	0	0	0	0	0	0	2	0	0	0	0	2	0	0	0	0	0	0	0	0	0	0	0
1ed1b3572cf3420788e4aa1d36f0ca86_rep;size=2299;	k__Bacteria	p__Proteobacteria	c__Alphaproteobacteria	o__Sphingomonadales	f__Sphingomonadaceae	g__Novosphingobium	g__Novosphingobium	218	0	0	2	4	0	11	10	2	0	6	2	0	11	0	4	5	9	1	0	2	5	4	10	5	16	3	36	22	1	20	2	10	2	38	3	37	8	6	9	13	13
9b7ee1828e97bfa546fb99602143a937_rep;size=2275;	k__Bacteria	p__Proteobacteria	c__Alphaproteobacteria	o__Sphingomonadales	f__Sphingomonadaceae	g__Sphingomonas	Ambiguous_taxa	14	0	0	96	0	402	0	0	0	14	175	0	2	0	15	1	6	0	0	1	2	0	40	35	0	0	0	4	2	1	14	2	39	0	1	0	5	1	0	2	8	0
0a5c11227ef52ab6641cf7cf30764238_rep;size=2272;	k__Bacteria	p__Proteobacteria	c__Alphaproteobacteria	o__Sphingomonadales	f__Sphingomonadaceae	g__Sphingomonas	Ambiguous_taxa	31	0	8	0	44	3	8	24	0	0	2	9	0	55	21	105	6	12	1	0	1	0	36	3	8	3	15	31	14	0	30	0	3	0	4	4	5	3	5	181	6	11
876ed260be5f69590ce1242534b48054_rep;size=2255;	k__Bacteria	p__Firmicutes	c__Bacilli	o__Bacillales	f__Staphylococcaceae	g__Staphylococcus	g__Staphylococcus	0	0	0	0	0	0	0	1	3	0	0	0	0	1	0	0	0	1	0	0	0	0	6	0	0	1	0	4	1	0	0	1	0	0	1	1	1	0	0	0	0	0
f41a19256ad96d9eefcd0109c8bc3be0_rep;size=2254;	k__Bacteria	p__Actinobacteria	c__Actinobacteria	o__Micrococcales	f__Microbacteriaceae	g__Microbacterium	g__Microbacterium	14	0	8	215	16	0	3	1	15	2	0	12	1	1	0	1	7	19	0	0	0	2	219	5	2	4	1	4	14	6	5	1	7	16	0	0	1	5	6	11	28	2
2cb50ce0b7cf4daa18125161c2be0cc4_rep;size=2252;	k__Bacteria	p__Proteobacteria	c__Alphaproteobacteria	o__Rhizobiales	f__Beijerinckiaceae	g__Methylobacterium	Ambiguous_taxa	0	8	4	14	0	733	3	5	25	3	0	0	0	0	45	0	0	0	1	8	0	0	0	0	0	1	1	1	9	16	0	0	0	628	0	0	0	0	1	1	0	1
f14855a3a9b882a9cc24fc5c12f9b13f_rep;size=2251;	k__Bacteria	p__Deinococcus-Thermus	c__Deinococci	o__Deinococcales	f__Deinococcaceae	g__Deinococcus	s__uncultured bacterium	11	0	5	1	23	0	11	0	3	28	3	0	0	15	0	9	0	5	0	0	3	0	1	0	49	0	9	39	5	2	2	0	23	0	0	14	30	0	1	14	0	16
9f1763efaa68d48cb2a566aaadc16172_rep;size=2241;	k__Bacteria	p__Actinobacteria	c__Actinobacteria	o__Micrococcales	f__Micrococcaceae	g__Kocuria	g__Kocuria	5	3	152	0	0	0	8	88	0	0	0	132	4	7	0	2	17	26	0	0	0	233	0	46	0	4	611	0	6	5	34	0	0	0	1	14	3	0	2	13	10	107
ca8b39f4b63cf1900a6d95507e8be977_rep;size=2239;	k__Bacteria	p__Cyanobacteria	c__Oxyphotobacteria	o__Nostocales	f__Chroococcidiopsaceae	g__uncultured	s__uncultured bacterium	15	0	1	0	10	0	3	8	7	77	0	0	0	4	4	3	2	12	0	0	1	0	0	0	71	0	0	131	18	4	0	0	108	0	3	0	17	0	2	8	3	8
adcecb7f901a1ccfc6c3714d1268a837_rep;size=2163;	k__Bacteria	p__Actinobacteria	c__Actinobacteria	o__Micrococcales	f__Micrococcaceae	f__Micrococcaceae	f__Micrococcaceae	13	0	21	4	4	0	14	38	0	0	0	30	0	10	0	19	1	27	0	0	1	48	7	1	9	21	60	26	8	0	7	0	12	1	25	32	40	11	0	15	34	28
2fec54f0c0f307169196798d6d94595c_rep;size=2141;	k__Bacteria	p__Firmicutes	c__Bacilli	o__Lactobacillales	f__Carnobacteriaceae	g__Carnobacterium	g__Carnobacterium	12	0	12	111	11	1	7	33	5	0	0	11	0	0	0	52	1	24	2	138	1	44	125	5	9	3	39	22	3	5	3	3	12	1	15	1	17	6	2	6	8	155
ee5702137220347db27b3dd51d01c9a5_rep;size=2064;	k__Bacteria	p__Actinobacteria	c__Actinobacteria	o__Micrococcales	f__Micrococcaceae	f__Micrococcaceae	f__Micrococcaceae	5	0	1	0	2	0	10	12	0	0	0	4	0	26	0	42	0	5	0	0	1	13	4	0	8	66	5	36	2	1	1	0	5	0	49	3	33	5	0	16	24	8
c5cc809645974b9cacdf3366eb5a7961_rep;size=2047;	k__Bacteria	p__Proteobacteria	c__Alphaproteobacteria	o__Rhizobiales	f__Devosiaceae	g__Devosia	g__Devosia	1	0	0	62	1	3	21	2	0	2	13	2	0	9	24	58	1	1	1	21	0	0	0	0	1	0	3	1	4	58	0	0	4	9	0	496	1	1	1	18	0	0
41452bafa4093acf3df277f328cec166_rep;size=2042;	k__Bacteria	p__Firmicutes	c__Bacilli	o__Bacillales	f__Family XII	g__Exiguobacterium	g__Exiguobacterium	10	0	5	392	10	0	4	7	0	2	0	4	0	0	0	2	108	21	1	1	0	16	19	0	9	38	16	43	1	0	4	0	0	7	35	3	13	11	3	37	69	29
4b1afa55fd21ef473f8b43011a9c0eb5_rep;size=2036;	k__Bacteria	p__Proteobacteria	c__Alphaproteobacteria	o__Rhizobiales	f__Xanthobacteraceae	f__Xanthobacteraceae	f__Xanthobacteraceae	0	0	0	1	0	0	0	0	0	0	0	1	0	0	0	0	0	0	0	0	0	0	0	0	0	0	1	0	0	5	0	0	0	6	0	1	0	0	1	0	0	0
9a8987327db4bd4f179e4948593ede73_rep;size=2004;	k__Bacteria	p__Actinobacteria	c__Actinobacteria	o__Micrococcales	f__Micrococcaceae	g__Kocuria	g__Kocuria	14	0	12	0	2	0	103	16	0	0	0	11	0	85	0	245	1	16	0	0	2	6	7	3	8	29	13	13	18	1	8	0	9	0	10	71	8	2	3	35	42	25
dd07ceb4838b11735ed58d12fc9a4afe_rep;size=2001;	k__Bacteria	p__Proteobacteria	c__Alphaproteobacteria	o__Rhizobiales	f__Beijerinckiaceae	g__Methylobacterium	Ambiguous_taxa	0	0	1	4	0	0	1	0	27	3	98	0	0	0	94	4	0	2	67	2	4	0	4	1	1	0	2	2	33	1	0	0	0	0	0	8	0	0	1	8	0	0
fa44128340e84bc7ead97407250cb26c_rep;size=1979;	k__Bacteria	p__Proteobacteria	c__Alphaproteobacteria	o__Sphingomonadales	f__Sphingomonadaceae	g__Sphingomonas	g__Sphingomonas	6	1	0	6	1	49	0	0	90	18	148	0	0	0	1	3	2	0	286	0	235	0	4	0	5	0	0	6	0	0	1	0	22	0	0	12	17	0	0	0	0	0
5b7c6b1dade105d8ba92ca4ab6b57c85_rep;size=1966;	k__Bacteria	p__Proteobacteria	c__Alphaproteobacteria	o__Rhodobacterales	f__Rhodobacteraceae	f__Rhodobacteraceae	f__Rhodobacteraceae	4	0	0	2	2	1	480	0	0	0	0	2	0	15	5	36	0	4	0	0	0	0	4	0	3	2	3	1	2	0	0	0	1	0	2	225	3	0	0	24	1	4
862075d2c2352a0b7c932dcbc612a363_rep;size=1932;	k__Bacteria	p__Proteobacteria	c__Alphaproteobacteria	o__Rhizobiales	f__Beijerinckiaceae	g__Methylobacterium	Ambiguous_taxa	0	0	0	1	0	12	2	0	2	627	3	0	0	0	6	0	0	0	17	0	0	0	1	0	0	0	0	1	0	0	0	0	0	0	0	0	0	0	0	1	0	0
47d1f98fa224c6cb89aa3a14cf3189a8_rep;size=1900;	k__Bacteria	p__Proteobacteria	c__Gammaproteobacteria	o__Betaproteobacteriales	f__Burkholderiaceae	g__Massilia	g__Massilia	0	0	0	7	1	12	1	1	4	0	0	0	0	1	0	0	2	3	0	0	0	0	1	13	0	0	1	0	4	3	0	686	2	1	0	0	2	4	101	8	0	0
cffec8a7bc9d0da236e162cff37846d4_rep;size=1876;	k__Bacteria	p__Proteobacteria	c__Alphaproteobacteria	o__Rhodobacterales	f__Rhodobacteraceae	g__Amaricoccus	Ambiguous_taxa	3	2	7	0	1	1	34	2	0	0	0	6	0	34	0	9	0	4	0	3	0	2	0	0	0	2	7	2	11	5	474	71	30	10	1	392	0	0	4	1	84	2
80312b1786ccf6839eaf94ebdd12f38a_rep;size=1871;	Unassigned	Unassigned	Unassigned	Unassigned	Unassigned	Unassigned	Unassigned	44	0	2	3	2	0	0	6	2	1	2	0	0	0	0	24	2	3	11	0	6	8	3	0	10	1	6	80	5	1	5	0	22	0	12	49	70	0	1	21	4	3
db5d7de36f97df2463c9b7fce4ca3d9f_rep;size=1867;	Unassigned	Unassigned	Unassigned	Unassigned	Unassigned	Unassigned	Unassigned	25	2	0	9	0	156	0	0	3	3	27	0	3	0	162	4	26	0	17	19	34	0	0	2	5	0	0	10	22	1	1	4	7	5	0	15	19	1	0	11	2	0
fb57a4df5f3d077387e8226ba9ce9dc5_rep;size=1863;	k__Bacteria	p__Proteobacteria	c__Alphaproteobacteria	o__Sphingomonadales	f__Sphingomonadaceae	g__Sphingomonas	s__Sphingomonas sp.	18	6	0	0	4	0	0	0	1	0	56	0	0	0	13	1	0	0	0	6	3	0	0	2	6	1	0	11	292	2	0	1	5	0	1	2	1	0	0	1	0	0
9e127c8e696339403741cdde7ca48dcb_rep;size=1861;	k__Bacteria	p__Actinobacteria	c__Actinobacteria	o__Micrococcales	f__Microbacteriaceae	f__Microbacteriaceae	f__Microbacteriaceae	0	1	0	9	4	6	44	18	0	0	2	23	0	33	2	11	2	49	0	2	0	4	10	2	0	46	4	0	30	1	15	0	0	380	47	36	0	21	3	8	11	6
65de1eaa5c80fac9e5a2c5b52441ee29_rep;size=1838;	k__Bacteria	p__Proteobacteria	c__Alphaproteobacteria	o__Sphingomonadales	f__Sphingomonadaceae	g__Sphingomonas	Ambiguous_taxa	4	0	0	9	4	136	2	0	22	0	19	1	0	2	407	6	3	0	1	239	1	0	1	1	1	1	5	13	0	1	3	1	7	104	1	2	1	0	4	10	2	3
fc906ee76560b76e3293ad8b7f08078a_rep;size=1833;	k__Bacteria	p__Proteobacteria	c__Alphaproteobacteria	o__Rhizobiales	f__Devosiaceae	f__Devosiaceae	f__Devosiaceae	0	355	0	32	0	3	3	0	0	0	3	0	0	0	4	0	1	0	0	70	1	1	0	11	5	2	1	0	18	2	2	12	0	3	2	2	0	0	1	0	0	0
4f8e03bd7c36508d5f84c0ed64a01b23_rep;size=1809;	k__Bacteria	p__Proteobacteria	c__Alphaproteobacteria	o__Sphingomonadales	f__Sphingomonadaceae	g__Sphingomonas	Ambiguous_taxa	19	1	0	6	1	1	2	5	0	0	2	0	0	0	0	7	1	3	2	2	0	3	3	2	5	2	2	64	11	0	17	5	6	2	9	57	46	0	2	16	3	2
96cd83a4cd0aa021608d3574207098e0_rep;size=1805;	k__Bacteria	p__Proteobacteria	c__Alphaproteobacteria	o__Rhizobiales	f__Xanthobacteraceae	Ambiguous_taxa	Ambiguous_taxa	0	0	2	1	0	0	0	0	0	0	0	1	0	0	0	0	0	1	0	10	0	1	0	0	5	0	0	0	0	0	0	0	1	41	0	0	0	1	29	0	0	0
21cff0d89df2498d7ad176ee8fbf0994_rep;size=1805;	Unassigned	Unassigned	Unassigned	Unassigned	Unassigned	Unassigned	Unassigned	55	2	26	0	2	0	18	36	0	0	0	5	5	11	0	33	2	26	0	0	1	34	5	4	12	21	72	28	12	0	25	0	8	0	24	49	18	1	1	54	10	59
679030acd2af94911f57150888d190d4_rep;size=1799;	k__Bacteria	p__Proteobacteria	c__Alphaproteobacteria	o__Sphingomonadales	f__Sphingomonadaceae	g__Sphingomonas	g__Sphingomonas	5	0	0	16	0	41	0	1	0	1	179	1	0	3	27	22	0	1	15	0	4	0	15	1	2	0	0	0	6	0	0	0	13	1	1	104	4	1	0	36	1	0
47cc8526ffc711523341750c836844bd_rep;size=1762;	k__Bacteria	p__Actinobacteria	c__Actinobacteria	o__Micrococcales	f__Micrococcaceae	f__Micrococcaceae	f__Micrococcaceae	0	5	142	0	0	0	16	57	0	0	0	135	10	6	0	3	11	22	0	0	0	157	1	41	0	1	481	2	2	39	24	4	2	6	0	13	1	0	0	7	18	54
c5e2614d36a55f734f5d170ab4590dc2_rep;size=1747;	Unassigned	Unassigned	Unassigned	Unassigned	Unassigned	Unassigned	Unassigned	9	1	8	4	0	0	0	5	2	0	3	0	0	7	0	87	3	6	1	0	2	3	2	2	0	1	18	24	5	0	7	1	9	2	2	69	13	0	0	208	4	5
55eed01596a2206a009958b04a57a43c_rep;size=1738;	k__Bacteria	p__Bacteroidetes	c__Bacteroidia	o__Cytophagales	f__Hymenobacteraceae	g__Hymenobacter	Ambiguous_taxa	16	0	0	0	17	4	1	2	0	0	1	5	0	4	0	50	7	8	0	0	0	1	5	2	3	10	0	5	5	4	4	0	4	0	5	32	5	5	12	96	3	13
f36d58d63d98b2aa3c9b58a291076b6f_rep;size=1677;	k__Bacteria	p__Proteobacteria	c__Alphaproteobacteria	o__Sphingomonadales	f__Sphingomonadaceae	g__Sphingomonas	g__Sphingomonas	14	0	0	114	0	240	0	0	1	10	88	0	1	0	0	0	5	0	1	0	1	0	24	28	0	0	0	4	3	0	3	2	52	0	0	0	3	0	0	0	7	0
7c39e0183b46eaa7a5d0f6a60d3bd850_rep;size=1669;	k__Bacteria	p__Actinobacteria	c__Actinobacteria	o__Micrococcales	f__Intrasporangiaceae	g__Ornithinimicrobium	Ambiguous_taxa	0	0	7	5	20	0	1	25	0	0	1	23	0	2	0	1	0	39	0	0	0	43	5	0	3	75	10	50	4	2	2	0	2	10	154	4	15	5	0	5	0	61
c64d0b194420756c348758b5e64f855e_rep;size=1664;	k__Bacteria	p__Proteobacteria	c__Alphaproteobacteria	o__Rhizobiales	f__Rhizobiaceae	g__Allorhizobium-Neorhizobium-Pararhizobium-Rhizobium	g__Allorhizobium-Neorhizobium-Pararhizobium-Rhizobium	7	0	4	22	0	0	14	7	0	0	0	0	119	2	0	0	152	1	0	0	0	7	6	14	17	13	1	6	67	1	1	0	8	56	25	38	5	6	46	1	6	27
9e013d64aa3c9380a5489dd69ada15f2_rep;size=1664;	k__Bacteria	p__Actinobacteria	c__Actinobacteria	o__Micrococcales	f__Micrococcaceae	f__Micrococcaceae	f__Micrococcaceae	34	1	10	6	3	2	14	17	3	3	3	1	7	3	1	22	13	13	0	0	14	5	9	32	9	4	8	21	38	0	43	1	13	0	10	35	9	2	4	24	19	20
702a2e9ade5179d0d4318fe59688b30d_rep;size=1663;	k__Bacteria	p__Proteobacteria	c__Alphaproteobacteria	o__Caulobacterales	f__Caulobacteraceae	g__Brevundimonas	Ambiguous_taxa	62	4	3	9	0	4	3	6	2	0	0	0	7	0	0	9	37	1	0	4	3	16	3	18	7	3	7	21	55	1	19	18	10	2	13	60	29	0	0	21	5	8
709f86fa546352396c16627a50c23893_rep;size=1656;	k__Bacteria	p__Proteobacteria	c__Alphaproteobacteria	o__Acetobacterales	f__Acetobacteraceae	g__Craurococcus	s__uncultured bacterium	4	0	0	0	28	0	4	0	4	7	1	3	0	32	0	11	0	9	0	0	6	0	5	0	30	0	2	53	6	22	0	0	51	0	1	2	33	1	8	3	2	7
01ddcff876339a5b67f2b012371f6faf_rep;size=1648;	k__Bacteria	p__Proteobacteria	c__Alphaproteobacteria	o__Sphingomonadales	f__Sphingomonadaceae	g__Sphingomonas	Ambiguous_taxa	6	0	0	13	0	56	0	0	4	114	32	0	0	1	695	4	4	2	10	2	7	0	3	0	0	0	0	5	0	1	0	0	3	0	0	0	2	0	1	7	1	0
0a1f5ed70dcb37a86924dbd5fde981af_rep;size=1637;	k__Bacteria	p__Proteobacteria	c__Gammaproteobacteria	o__Pseudomonadales	f__Moraxellaceae	g__Enhydrobacter	g__Enhydrobacter	0	0	0	1	6	0	8	2	0	1	0	1	0	5	1	4	0	110	0	0	0	0	0	0	0	0	2	4	9	0	0	0	19	46	0	2	0	0	0	27	0	3
572f78140a238dd366dcc0a65ef65a68_rep;size=1630;	k__Bacteria	p__Cyanobacteria	c__Oxyphotobacteria	o__Nostocales	f__Chroococcidiopsaceae	g__uncultured	s__uncultured bacterium	22	0	0	0	14	0	10	3	1	3	2	0	0	4	0	5	0	1	0	0	7	0	19	0	11	0	0	89	5	2	0	0	23	0	0	5	44	0	1	7	0	7
cd99d8d89e871e9ebdc7ad67825cbe35_rep;size=1624;	Unassigned	Unassigned	Unassigned	Unassigned	Unassigned	Unassigned	Unassigned	12	0	4	0	13	0	14	9	2	4	0	1	0	8	0	14	0	0	0	0	0	0	2	0	29	0	2	30	11	10	0	0	63	0	3	15	17	0	7	18	0	7
99cc5eaf54b546fce62e259070661a02_rep;size=1613;	Unassigned	Unassigned	Unassigned	Unassigned	Unassigned	Unassigned	Unassigned	1	0	0	10	0	82	0	1	2	2	5	0	0	0	4	0	0	1	4	4	11	0	2	0	2	0	0	0	8	6	0	1	0	2	0	6	0	0	0	0	0	0
89acb0b1e02837f9d10dd3fdce3b3e29_rep;size=1604;	k__Bacteria	p__Actinobacteria	c__Actinobacteria	o__Corynebacteriales	f__Nocardiaceae	g__Williamsia	g__Williamsia	0	1	0	0	1	7	0	1	0	1	0	0	0	0	0	0	7	0	0	0	0	0	67	0	0	1	0	0	20	3	1	0	10	3	1	0	0	1	372	0	0	0
d2666e3d94a1f70741555b5fa38f5735_rep;size=1602;	k__Bacteria	p__Actinobacteria	c__Actinobacteria	o__Micrococcales	f__Microbacteriaceae	g__Microbacterium	g__Microbacterium	80	3	23	8	1	2	1	25	0	0	0	30	105	13	0	0	16	38	0	0	1	52	7	20	8	3	67	37	4	1	12	4	4	2	17	7	24	3	8	2	29	46
ed9d26225d08929d92a346cc9b52f5e6_rep;size=1592;	k__Bacteria	p__Proteobacteria	c__Gammaproteobacteria	o__Betaproteobacteriales	f__Burkholderiaceae	g__Massilia	s__uncultured bacterium	3	13	1	238	0	5	4	1	0	0	2	2	0	0	0	15	89	0	90	17	5	3	0	7	8	0	1	8	2	0	1	111	10	209	0	0	4	1	4	2	1	6
aef85083eb6be511785c796f7b703cb8_rep;size=1585;	k__Bacteria	p__Actinobacteria	c__Actinobacteria	o__Micrococcales	f__Micrococcaceae	g__Kocuria	g__Kocuria	13	0	6	1	8	0	37	21	0	1	0	15	0	54	0	237	1	21	0	0	1	8	2	1	11	11	15	19	16	0	7	0	4	0	6	42	11	0	2	98	18	25
efbb27ba6f191b377c69127e77ae5664_rep;size=1583;	Unassigned	Unassigned	Unassigned	Unassigned	Unassigned	Unassigned	Unassigned	10	2	0	6	0	139	0	0	1	1	18	0	3	1	165	6	14	0	17	0	19	0	3	2	6	1	2	9	21	1	1	2	2	3	0	7	8	0	1	7	2	0
22ba79bc09a88468552595f7680bf750_rep;size=1580;	k__Bacteria	p__Proteobacteria	c__Gammaproteobacteria	o__Enterobacteriales	f__Enterobacteriaceae	f__Enterobacteriaceae	f__Enterobacteriaceae	304	0	19	21	4	0	5	3	20	2	0	0	0	0	23	3	0	6	0	0	0	0	0	0	57	0	0	4	0	68	0	2	2	0	0	3	1	0	1	0	0	0
8c98bd1e1637d13609399b1c03d4b12c_rep;size=1562;	k__Bacteria	p__Proteobacteria	c__Alphaproteobacteria	o__Sphingomonadales	f__Sphingomonadaceae	f__Sphingomonadaceae	f__Sphingomonadaceae	24	5	2	1	1	50	1	3	0	0	15	0	1	3	0	32	58	2	2	15	0	0	140	11	5	0	0	8	4	38	3	2	41	11	1	4	0	0	3	4	8	0
f82400463be994ae75def191bc996f15_rep;size=1552;	k__Bacteria	p__Proteobacteria	c__Alphaproteobacteria	o__Sphingomonadales	f__Sphingomonadaceae	g__Sphingomonas	g__Sphingomonas	33	2	1	12	0	1	0	2	5	0	10	0	0	0	0	3	9	0	4	0	913	0	0	0	15	0	0	9	2	0	0	0	26	0	0	4	12	0	0	0	1	0
cb8083d20e80816ad8ad8550e4ab1795_rep;size=1542;	k__Bacteria	p__Proteobacteria	c__Alphaproteobacteria	o__Sphingomonadales	f__Sphingomonadaceae	g__Sphingomonas	Ambiguous_taxa	13	0	1	29	5	79	0	2	1	1	85	0	0	2	12	20	0	1	8	1	3	0	30	6	5	0	3	12	2	0	2	3	12	0	1	13	10	0	0	92	2	2
7b52a85cedd443ecf0a790aba5b9149f_rep;size=1523;	Unassigned	Unassigned	Unassigned	Unassigned	Unassigned	Unassigned	Unassigned	0	0	0	10	0	259	0	0	5	20	25	0	0	0	58	1	7	0	44	4	14	0	2	1	1	0	0	2	9	2	0	0	0	5	0	1	0	0	1	3	0	0
622ada39d121c1b46351e4fe15e186eb_rep;size=1519;	k__Bacteria	p__Actinobacteria	c__Actinobacteria	o__Micrococcales	f__Micrococcaceae	g__Kocuria	g__Kocuria	5	0	32	5	0	0	14	36	0	0	0	27	0	109	0	37	6	51	0	0	0	8	7	21	0	12	77	5	12	0	46	0	4	1	8	15	3	1	0	11	8	63
781f7ae24c4e58b34d285b7188c77c57_rep;size=1518;	k__Bacteria	p__Proteobacteria	c__Alphaproteobacteria	o__Rhizobiales	f__Beijerinckiaceae	g__Methylobacterium	Ambiguous_taxa	0	1	0	7	0	132	0	0	4	127	248	0	0	0	46	1	0	0	69	1	6	0	4	0	4	0	0	1	0	4	0	0	0	5	0	0	4	3	0	3	0	0
b280665a8f753938d190b6c5d73f30e9_rep;size=1518;	k__Bacteria	p__Proteobacteria	c__Gammaproteobacteria	o__Betaproteobacteriales	f__Burkholderiaceae	g__Massilia	g__Massilia	4	0	0	8	6	1	0	3	0	0	0	0	0	15	0	29	4	9	0	0	1	0	6	2	5	3	3	13	13	0	1	236	18	10	4	2	5	0	13	37	8	7
a90b9247bef9fecec1e2aee5c1dbe66d_rep;size=1515;	k__Bacteria	p__Proteobacteria	c__Alphaproteobacteria	o__Rhodobacterales	f__Rhodobacteraceae	f__Rhodobacteraceae	f__Rhodobacteraceae	21	1	7	0	2	0	4	60	0	0	0	8	0	10	0	16	0	30	0	0	0	0	6	1	2	2	31	4	54	0	7	51	2	1	24	12	0	4	0	79	4	34
02af56e2a504368eb5e94fde6142be61_rep;size=1511;	k__Bacteria	p__Proteobacteria	c__Alphaproteobacteria	o__Acetobacterales	f__Acetobacteraceae	g__Craurococcus	s__uncultured bacterium	11	0	0	0	66	0	6	0	7	3	0	3	0	15	0	1	0	19	2	0	2	0	4	0	151	0	0	72	3	16	0	0	62	0	3	0	20	0	7	7	2	0
422977b3b1e77f459e3d5efce28a6df7_rep;size=1509;	k__Bacteria	p__Actinobacteria	c__Actinobacteria	o__Frankiales	f__Geodermatophilaceae	g__Modestobacter	g__Modestobacter	6	0	1	0	91	0	4	2	0	10	0	21	0	87	0	5	0	39	0	0	2	0	5	0	5	3	6	9	23	35	1	0	6	5	2	4	5	26	40	20	7	6
4c765540f65a35c4d9f0d72f2eb488af_rep;size=1504;	Unassigned	Unassigned	Unassigned	Unassigned	Unassigned	Unassigned	Unassigned	0	0	3	0	0	0	0	12	0	0	0	6	0	3	0	2	8	10	0	0	0	21	0	13	0	248	2	0	3	0	5	0	0	5	196	1	0	12	0	0	0	4
47b154c315e87a13c33fba65eee0fa54_rep;size=1497;	k__Bacteria	p__Proteobacteria	c__Alphaproteobacteria	o__Sphingomonadales	f__Sphingomonadaceae	g__Novosphingobium	g__Novosphingobium	6	0	0	0	5	0	0	0	0	0	0	0	0	0	0	0	0	1	8	0	0	0	0	0	4	0	0	0	3	0	0	0	0	0	0	0	0	0	0	0	0	0
c321cae4ac8a7106094fdf92ee989e2a_rep;size=1490;	k__Bacteria	p__Actinobacteria	c__Actinobacteria	o__Micrococcales	f__Micrococcaceae	g__Kocuria	g__Kocuria	54	2	4	13	1	0	1	10	2	2	6	6	1	6	0	16	13	19	0	0	3	4	21	4	12	13	2	16	11	2	7	0	15	1	21	24	13	2	28	16	12	4
625fcb71ee40cace555f27f191ff6f86_rep;size=1488;	k__Bacteria	p__Proteobacteria	c__Alphaproteobacteria	o__Rhizobiales	f__Rhizobiaceae	g__Aureimonas	Ambiguous_taxa	6	16	2	7	0	5	20	16	1	0	0	1	24	15	0	17	17	4	0	8	0	13	12	13	2	9	5	5	81	0	56	0	1	21	34	67	2	3	2	30	28	12
e2975bc26d548207c531ef66ffd87e34_rep;size=1484;	Unassigned	Unassigned	Unassigned	Unassigned	Unassigned	Unassigned	Unassigned	39	0	4	4	1	1	1	8	1	0	6	0	0	2	0	26	9	7	4	0	17	1	7	3	11	6	3	26	2	2	7	0	31	2	10	10	26	1	2	7	22	3
b28dd2b56f477bbc49ea77a85f0b0a62_rep;size=1481;	Unassigned	Unassigned	Unassigned	Unassigned	Unassigned	Unassigned	Unassigned	44	3	28	21	3	3	2	24	1	0	0	52	31	6	0	1	2	34	0	0	1	40	10	14	11	5	54	15	19	1	15	6	2	0	3	19	18	4	13	7	11	43
ef0cf5a46b315bca657aae0f8a6fae93_rep;size=1468;	k__Bacteria	p__Proteobacteria	c__Alphaproteobacteria	o__Sphingomonadales	f__Sphingomonadaceae	g__Novosphingobium	s__Novosphingobium sp. NIHHS054	0	0	0	0	0	9	0	0	0	0	0	0	0	1	0	0	2	1	0	0	0	0	13	146	1	0	0	1	0	0	0	0	2	0	2	0	0	1	0	1	0	0
a151f3d16955a2783c0fac849b1d0484_rep;size=1456;	k__Bacteria	p__Proteobacteria	c__Alphaproteobacteria	o__Sphingomonadales	f__Sphingomonadaceae	g__Sphingomonas	g__Sphingomonas	41	7	2	17	0	7	0	0	1	0	14	0	0	0	0	3	5	0	6	4	810	0	6	0	11	0	0	7	1	1	0	0	18	0	0	2	15	0	0	0	2	0
1c7914ba669cc2b86be741a446f728e1_rep;size=1456;	Unassigned	Unassigned	Unassigned	Unassigned	Unassigned	Unassigned	Unassigned	2	0	0	3	0	8	0	0	14	2	254	0	0	0	1	9	7	0	291	8	74	0	0	0	7	0	0	5	0	0	0	0	16	0	0	5	3	0	0	4	1	0
e22a0f9950fdb90ee802ff3471e734ab_rep;size=1452;	k__Bacteria	p__Proteobacteria	c__Alphaproteobacteria	o__Rhizobiales	f__Beijerinckiaceae	g__Methylobacterium	Ambiguous_taxa	1	0	0	3	0	18	0	0	0	170	224	0	0	0	23	0	0	0	6	6	1	0	1	0	1	0	0	0	1	2	0	0	0	5	0	0	0	0	0	2	0	0
c0371d9f5f589efffbe74f7298bf37d1_rep;size=1445;	k__Bacteria	p__Actinobacteria	c__Actinobacteria	o__Micrococcales	f__Micrococcaceae	g__Micrococcus	g__Micrococcus	4	0	0	0	2	2	20	2	4	0	0	4	0	0	0	6	10	9	0	1	0	11	1	0	0	3	2	2	0	47	1	0	0	40	10	0	1	0	16	0	4	1
368672d89a7f918b050cade823a107cd_rep;size=1434;	Unassigned	Unassigned	Unassigned	Unassigned	Unassigned	Unassigned	Unassigned	0	0	1	0	0	0	7	1	0	0	0	16	0	2	0	0	0	3	0	0	0	0	1	0	0	0	0	1	0	1065	21	2	0	136	6	2	0	0	2	0	2	3
6f1c8957eeb742fb0d5d68f09ab5bec3_rep;size=1429;	k__Bacteria	p__Proteobacteria	c__Gammaproteobacteria	o__Xanthomonadales	f__Xanthomonadaceae	g__Stenotrophomonas	g__Stenotrophomonas	3	32	0	3	3	18	1	0	1	0	2	2	112	4	0	4	6	7	0	17	2	0	0	36	12	2	0	5	60	0	9	60	12	8	0	1	2	4	2	6	1	0
5e2b3f64a35a14f4e01d4b881362f4d1_rep;size=1418;	k__Bacteria	p__Proteobacteria	c__Alphaproteobacteria	o__Rhodobacterales	f__Rhodobacteraceae	g__Rubellimicrobium	s__uncultured bacterium	8	0	2	0	27	0	28	11	1	2	0	4	0	43	3	31	1	49	2	0	0	0	7	0	9	0	23	47	25	2	0	0	10	0	2	5	15	0	3	34	0	33
e4fe0c934e123cb90b26aa7ba9a11910_rep;size=1410;	k__Bacteria	p__Proteobacteria	c__Alphaproteobacteria	o__Sphingomonadales	f__Sphingomonadaceae	g__Sphingobium	g__Sphingobium	13	0	0	0	2	0	0	0	0	0	3	0	0	1	0	1	0	0	0	0	14	0	0	3	11	2	0	18	270	0	7	10	1	1	13	5	6	0	1	1	2	0
77b4e7551b8263ad30d3a2cc30ce48c8_rep;size=1389;	k__Bacteria	p__Proteobacteria	c__Alphaproteobacteria	o__Rhizobiales	f__Beijerinckiaceae	g__Bosea	g__Bosea	0	343	1	2	0	3	4	4	0	0	4	1	0	0	7	0	2	0	0	98	1	4	0	4	0	1	1	1	101	0	7	1	1	13	9	17	0	0	1	1	1	0
8dd7a9ca3f5572b2d14c16065dd628cf_rep;size=1384;	k__Bacteria	p__Bacteroidetes	c__Bacteroidia	o__Cytophagales	f__Hymenobacteraceae	g__Hymenobacter	g__Hymenobacter	4	0	1	0	5	4	0	0	0	0	176	0	0	4	47	1	4	0	2	1	40	0	8	5	0	1	2	16	0	8	0	2	16	2	1	19	2	1	2	6	3	1
29bde29dd74f06981949b4d463392504_rep;size=1379;	k__Bacteria	p__Actinobacteria	c__Actinobacteria	o__Micrococcales	f__Microbacteriaceae	f__Microbacteriaceae	f__Microbacteriaceae	0	0	0	109	2	0	1	0	12	0	0	0	0	1	0	0	0	16	0	0	0	1	9	1	0	0	0	0	1	6	4	0	0	11	0	0	0	1	2	0	0	0
f14d1f37336dba20e035cfc6d4b91dc0_rep;size=1378;	k__Bacteria	p__Proteobacteria	c__Alphaproteobacteria	o__Caulobacterales	f__Caulobacteraceae	g__Brevundimonas	g__Brevundimonas	2	135	2	2	0	2	0	12	0	0	0	1	0	0	0	0	1	0	0	0	0	17	0	0	0	2	2	2	75	3	8	4	21	3	0	27	1	0	18	6	0	11
07610c1a9fcc4e27b350b621b1bc9c61_rep;size=1375;	k__Bacteria	p__Proteobacteria	c__Alphaproteobacteria	o__Sphingomonadales	f__Sphingomonadaceae	g__Sphingomonas	g__Sphingomonas	7	1	0	2	0	15	0	0	7	1	45	0	0	0	0	2	1	1	118	1	77	0	4	0	6	0	1	26	2	0	0	1	29	0	3	8	22	0	0	5	2	0
3f57371560566b250560c1bc38f13e96_rep;size=1363;	Unassigned	Unassigned	Unassigned	Unassigned	Unassigned	Unassigned	Unassigned	0	0	0	3	2	0	0	0	0	0	54	0	0	0	0	0	0	0	40	0	1	0	0	0	0	0	0	0	0	0	0	0	0	17	0	67	0	2	0	1	0	0
e9119fd8c31e47a415d4cf709e539b8a_rep;size=1358;	k__Bacteria	p__Proteobacteria	c__Gammaproteobacteria	o__Xanthomonadales	f__Xanthomonadaceae	g__Luteimonas	g__Luteimonas	34	1	1	1	8	0	1	12	2	0	0	4	0	0	0	2	0	6	0	0	3	12	4	0	1	32	7	42	3	2	1	2	14	3	77	5	22	4	0	2	0	13
483b3690c91553e2781afa6dbecb3a61_rep;size=1355;	k__Bacteria	p__Deinococcus-Thermus	c__Deinococci	o__Deinococcales	f__Deinococcaceae	g__Deinococcus	s__uncultured bacterium	18	0	5	0	9	0	12	8	2	1	0	0	0	21	0	1	0	22	0	0	6	0	0	0	13	0	3	16	8	0	2	0	18	0	0	9	17	0	1	15	0	2
f43cd29f2ecc03ef3b93b7086fa62d4e_rep;size=1353;	k__Bacteria	p__Actinobacteria	c__Actinobacteria	o__Micrococcales	f__Micrococcaceae	f__Micrococcaceae	f__Micrococcaceae	4	0	4	0	1	0	6	16	0	0	0	6	0	29	0	17	0	15	0	0	1	13	7	3	6	31	24	11	4	0	5	0	7	0	22	10	13	8	0	13	27	17
3fe218901f7d0f47b64827a0b3b4d555_rep;size=1349;	k__Bacteria	p__Actinobacteria	c__Actinobacteria	o__Micrococcales	f__Intrasporangiaceae	g__Ornithinimicrobium	g__Ornithinimicrobium	0	1	4	2	12	0	1	23	1	0	1	27	0	4	0	21	0	29	5	0	1	19	5	0	2	50	16	36	3	3	1	0	0	8	69	27	17	4	1	6	2	79
966680cadb24fc17a081bdcaf2222c46_rep;size=1345;	k__Bacteria	p__Proteobacteria	c__Gammaproteobacteria	o__Betaproteobacteriales	f__Burkholderiaceae	g__Massilia	g__Massilia	0	25	9	83	2	1	4	4	1	0	0	3	0	6	0	22	5	2	32	31	0	1	0	3	1	0	1	6	3	0	0	23	6	57	1	0	3	5	2	4	0	2
321b4f76a20c0441f864d6adf4b22c4a_rep;size=1344;	k__Bacteria	p__Proteobacteria	c__Alphaproteobacteria	o__Acetobacterales	f__Acetobacteraceae	g__Craurococcus	s__uncultured bacterium	9	0	2	0	75	1	18	0	2	8	0	8	0	6	0	5	1	26	1	0	2	0	2	2	23	0	0	37	5	8	1	0	32	0	0	0	7	0	11	5	0	12
043b4116aa28c09c7f24535a123837ba_rep;size=1342;	k__Bacteria	p__Proteobacteria	c__Alphaproteobacteria	o__Sphingomonadales	f__Sphingomonadaceae	g__Sphingomonas	Ambiguous_taxa	3	4	0	1	4	93	0	0	3	29	23	1	0	3	497	23	13	0	1	15	1	0	1	0	3	0	0	1	5	1	1	0	9	3	0	1	3	8	2	1	13	0
8074bde1428d06ef117fb5f887caeec8_rep;size=1340;	k__Bacteria	p__Actinobacteria	c__Actinobacteria	o__Micrococcales	f__Dermatophilaceae	f__Dermatophilaceae	f__Dermatophilaceae	0	0	1	1	7	0	0	4	0	0	0	13	0	24	0	3	0	1	18	0	0	1	0	0	1	2	0	4	0	125	0	0	0	561	5	2	0	0	0	3	0	3
7b91db76adc48cea9264e3464f06fed6_rep;size=1339;	k__Bacteria	p__Proteobacteria	c__Alphaproteobacteria	o__Sphingomonadales	f__Sphingomonadaceae	g__Sphingomonas	Ambiguous_taxa	5	1	0	1	0	86	23	2	3	1	184	0	1	0	217	7	0	0	3	20	5	0	1	2	3	0	0	5	2	1	0	0	5	1	0	5	4	0	0	12	0	0
6a8cd212906e0a5fd451e76aa130f625_rep;size=1332;	k__Bacteria	p__Proteobacteria	c__Alphaproteobacteria	o__Rhizobiales	f__Rhizobiaceae	g__Allorhizobium-Neorhizobium-Pararhizobium-Rhizobium	g__Allorhizobium-Neorhizobium-Pararhizobium-Rhizobium	12	0	19	5	7	0	2	9	0	1	0	1	0	4	0	29	82	20	0	0	0	4	80	11	11	4	3	4	34	0	24	0	0	1	2	64	3	0	4	28	19	11
8cfc4522912394e0b480c465f65c8a1f_rep;size=1326;	k__Bacteria	p__Proteobacteria	c__Gammaproteobacteria	o__Betaproteobacteriales	f__Burkholderiaceae	g__Massilia	g__Massilia	1	0	0	0	0	2	0	1	0	1	0	2	0	6	0	20	0	1	0	0	0	0	0	1	1	0	0	6	1	0	0	1	3	0	3	0	0	1	0	1	2	0
4d93383d0d775f7979f2fbe804ff9997_rep;size=1320;	k__Bacteria	p__Proteobacteria	c__Gammaproteobacteria	o__Betaproteobacteriales	f__Burkholderiaceae	g__Acidovorax	g__Acidovorax	0	0	0	0	0	0	0	0	0	0	0	1	0	0	0	0	0	2	0	0	7	0	0	0	0	0	0	5	3	0	0	0	1	0	0	0	0	0	0	2	0	0
b7bc81686e7519cd149e6a8251baa31a_rep;size=1314;	k__Bacteria	p__Proteobacteria	c__Gammaproteobacteria	o__Betaproteobacteriales	f__Burkholderiaceae	g__Massilia	s__uncultured bacterium	1	2	1	49	0	16	4	1	2	3	0	1	0	2	0	26	99	3	14	15	1	3	2	0	1	0	0	3	0	0	1	3	3	2	1	0	1	1	8	3	0	3
31f2ffb3c51efb89b9d4f2a17b334b2f_rep;size=1311;	k__Bacteria	p__Proteobacteria	c__Alphaproteobacteria	o__Rhizobiales	f__Beijerinckiaceae	g__Methylobacterium	Ambiguous_taxa	0	0	0	0	0	427	0	0	19	4	0	0	0	0	12	0	0	0	6	2	1	0	2	0	1	0	0	0	12	56	0	0	0	3	0	0	1	0	0	0	0	1
af037c6e74259da794789377b1e45db2_rep;size=1309;	Unassigned	Unassigned	Unassigned	Unassigned	Unassigned	Unassigned	Unassigned	5	1	93	1	0	0	0	88	0	0	0	77	14	4	0	0	4	16	0	0	0	57	2	12	0	0	245	3	0	3	29	2	0	0	3	6	4	11	3	2	38	130
62fa84d7e105e85e81d81bb1319a10ed_rep;size=1307;	k__Bacteria	p__Firmicutes	c__Clostridia	o__Clostridiales	f__Family XI	g__Peptoniphilus	s__uncultured bacterium	0	0	0	0	0	0	0	0	0	0	0	0	0	0	0	0	0	0	0	0	0	0	0	0	0	0	0	0	0	0	0	1	0	1	0	0	0	0	0	0	0	0
8b357452101eda9a054cfabeda09eef8_rep;size=1307;	Unassigned	Unassigned	Unassigned	Unassigned	Unassigned	Unassigned	Unassigned	35	1	2	13	0	1	0	5	1	0	3	2	0	1	0	7	0	11	3	0	1	5	11	2	11	1	2	24	17	0	2	3	3	0	4	34	16	5	3	7	3	5
c41ff3a6406eec032f3159807cb38da8_rep;size=1305;	k__Bacteria	p__Actinobacteria	c__Actinobacteria	o__Micrococcales	f__Cellulomonadaceae	f__Cellulomonadaceae	f__Cellulomonadaceae	25	0	0	7	2	0	2	1	1	0	5	0	0	4	0	24	1	4	0	0	7	0	13	0	9	9	0	36	4	0	0	1	8	0	14	16	25	3	1	8	6	0
1cf60ec7216ed5fca75b6fac17f43244_rep;size=1299;	k__Bacteria	p__Proteobacteria	c__Alphaproteobacteria	o__Caulobacterales	f__Caulobacteraceae	g__Brevundimonas	g__Brevundimonas	10	5	0	2	0	35	0	3	9	0	4	0	43	6	35	7	45	1	14	2	27	3	4	12	2	0	1	8	49	0	4	2	2	8	1	16	1	3	0	7	6	2
ce7d5a61b05f425986a3398236376092_rep;size=1296;	k__Bacteria	p__Proteobacteria	c__Alphaproteobacteria	o__Sphingomonadales	f__Sphingomonadaceae	g__Sphingomonas	g__Sphingomonas	38	1	2	2	1	2	0	2	1	0	0	0	0	0	0	10	1	8	4	0	8	1	1	0	4	2	4	47	7	0	5	0	21	0	5	45	48	1	0	12	1	2
6306bc8fbabc8bc68e7b7d789264b1d7_rep;size=1291;	k__Bacteria	p__Deinococcus-Thermus	c__Deinococci	o__Deinococcales	f__Deinococcaceae	g__Deinococcus	s__uncultured bacterium	8	0	1	0	16	0	0	6	4	18	0	0	0	5	0	24	1	5	1	0	1	0	3	0	12	0	10	14	2	3	0	0	24	0	1	6	24	0	3	10	0	13
bd6383169ddd32592a82ccdb7511c186_rep;size=1290;	k__Bacteria	p__Proteobacteria	c__Gammaproteobacteria	o__Enterobacteriales	f__Enterobacteriaceae	f__Enterobacteriaceae	f__Enterobacteriaceae	3	0	10	0	0	0	0	0	0	0	0	0	0	1	0	1	2	0	0	2	0	0	1	4	41	0	0	0	1	2	0	0	1	0	0	0	0	1	1	1	0	0
303b4bf6f87d9cdfab83c321baa48678_rep;size=1289;	k__Bacteria	p__Proteobacteria	c__Alphaproteobacteria	o__Azospirillales	f__Azospirillaceae	g__Skermanella	g__Skermanella	19	0	0	2	33	1	7	0	6	9	0	3	0	1	2	10	3	11	0	0	0	0	15	1	17	2	1	31	9	1	11	0	21	1	1	27	1	3	0	12	0	7
8635978207cbddd62c216e5a908c4f52_rep;size=1287;	Unassigned	Unassigned	Unassigned	Unassigned	Unassigned	Unassigned	Unassigned	0	0	0	0	0	0	0	0	0	0	0	0	0	3	0	0	0	0	0	1	0	0	0	0	0	0	0	0	0	0	0	0	0	0	1	0	1	0	0	0	0	0
e1a653ba9eaed803acce5ba426cb145e_rep;size=1286;	k__Bacteria	p__Firmicutes	c__Clostridia	o__Clostridiales	f__Clostridiaceae 1	g__Clostridium sensu stricto 8	g__Clostridium sensu stricto 8	0	0	1	0	1	1	0	0	0	0	0	0	1	4	0	0	0	0	0	0	0	0	2	777	0	0	0	0	1	0	14	34	0	1	1	0	1	0	0	1	0	0
500417f3a9ad322d75db438c3de3441c_rep;size=1282;	Unassigned	Unassigned	Unassigned	Unassigned	Unassigned	Unassigned	Unassigned	1	0	0	1	4	2	1	12	0	0	0	13	0	37	0	37	2	21	3	0	0	8	8	1	0	59	11	11	1	0	5	0	4	8	36	2	3	3	0	2	14	9
500ee7779dd3b14147d6b29421bc239a_rep;size=1275;	k__Bacteria	p__Proteobacteria	c__Alphaproteobacteria	o__Caulobacterales	f__Caulobacteraceae	g__Brevundimonas	g__Brevundimonas	0	5	3	6	0	18	0	4	0	0	1	0	0	0	9	0	18	2	0	0	29	7	2	4	4	0	6	16	123	1	0	7	0	0	4	493	4	0	50	4	0	3
e1d098412c88700cbd3c119e7c62f2ca_rep;size=1260;	k__Bacteria	p__Firmicutes	c__Bacilli	o__Lactobacillales	f__Aerococcaceae	g__Aerococcus	g__Aerococcus	5	3	4	14	0	0	0	11	0	0	0	3	0	0	157	0	0	7	0	11	0	5	11	2	11	8	2	118	1	0	1	0	186	2	9	3	6	0	0	0	2	8
8f1121093ff004eeff2530a8cfe5f064_rep;size=1255;	k__Bacteria	p__Proteobacteria	c__Gammaproteobacteria	o__Pseudomonadales	f__Pseudomonadaceae	g__Pseudomonas	Ambiguous_taxa	0	2	10	188	2	5	1	0	0	1	0	4	0	1	0	1	10	0	0	4	0	0	6	0	0	0	0	0	0	1	2	0	1	3	0	0	0	1	2	0	0	0
b783334fbb89f78d0291bb8b97c95c59_rep;size=1254;	Unassigned	Unassigned	Unassigned	Unassigned	Unassigned	Unassigned	Unassigned	35	0	9	2	0	0	14	27	0	0	0	3	7	8	0	14	1	12	0	0	0	15	4	4	6	9	50	18	4	0	26	0	3	1	12	34	26	1	0	35	7	51
f332176c7f1480e420ae39b4fd91959b_rep;size=1251;	k__Bacteria	p__Proteobacteria	c__Alphaproteobacteria	o__Rhizobiales	f__Beijerinckiaceae	g__Methylobacterium	g__Methylobacterium	0	2	0	18	0	15	1	0	0	14	40	1	0	2	36	1	0	1	0	48	1	0	4	0	1	0	1	0	4	2	2	0	2	8	0	8	0	0	0	0	2	0
284d7c088cf3ae248e1bf70a9a42d5c2_rep;size=1234;	k__Bacteria	p__Actinobacteria	c__Actinobacteria	o__Micrococcales	f__Micrococcaceae	f__Micrococcaceae	f__Micrococcaceae	54	0	6	0	0	0	6	26	0	0	0	4	12	30	0	111	2	21	0	0	0	1	5	6	2	14	11	8	6	3	34	0	9	1	4	4	6	2	4	23	34	21
966970a94fb39f7157211555d15fddc4_rep;size=1230;	Unassigned	Unassigned	Unassigned	Unassigned	Unassigned	Unassigned	Unassigned	33	0	0	1	0	0	0	3	5	0	0	0	0	0	0	13	0	0	5	0	5	1	4	0	6	1	1	63	4	0	4	0	16	0	2	39	49	0	0	14	2	5
6c9d2b67e4d3e9a4aa9627d1867edd86_rep;size=1225;	Unassigned	Unassigned	Unassigned	Unassigned	Unassigned	Unassigned	Unassigned	49	0	23	2	1	0	6	22	0	0	0	2	2	8	0	23	5	11	0	0	0	23	4	2	6	12	32	29	6	0	26	0	3	0	21	38	19	1	1	35	9	27
4daca5632adb451beba6f73db5b53f87_rep;size=1224;	k__Bacteria	p__Actinobacteria	c__Actinobacteria	o__Micrococcales	f__uncultured	g__uncultured bacterium	s__uncultured bacterium	49	2	2	1	2	0	6	17	0	0	0	7	0	20	0	57	3	32	2	0	2	5	75	0	2	36	1	12	9	4	17	0	16	8	29	3	13	6	6	24	45	9
242fff2b5f951017fd48ea3499f480b1_rep;size=1220;	k__Bacteria	p__Proteobacteria	c__Gammaproteobacteria	o__Enterobacteriales	f__Enterobacteriaceae	f__Enterobacteriaceae	f__Enterobacteriaceae	0	0	102	0	0	0	1	1	0	0	0	0	0	0	0	0	0	1	0	0	0	0	0	1	3	0	1	0	0	0	0	0	0	0	0	0	0	0	0	0	0	0
53dd36cbdf21b385c3be3496a8295b13_rep;size=1217;	Unassigned	Unassigned	Unassigned	Unassigned	Unassigned	Unassigned	Unassigned	16	1	0	2	0	103	0	0	1	0	26	0	0	1	109	1	6	0	16	2	74	0	3	3	1	0	1	10	10	0	3	1	6	5	0	7	13	0	1	23	0	0
0b7ae5330fc365cb7705891c44da794e_rep;size=1216;	k__Bacteria	p__Actinobacteria	c__Actinobacteria	o__Micrococcales	f__Microbacteriaceae	f__Microbacteriaceae	f__Microbacteriaceae	16	0	0	11	5	0	1	5	1	0	2	1	0	3	0	11	2	11	0	0	8	1	18	0	6	13	3	18	13	0	7	0	18	1	6	30	10	2	1	11	11	3
658b3f7338c3cc72a898238baabcb2a6_rep;size=1207;	k__Bacteria	p__Actinobacteria	c__Actinobacteria	o__Micrococcales	o__Micrococcales	o__Micrococcales	o__Micrococcales	0	6	0	0	4	94	1	0	2	3	0	3	0	4	0	1	1	2	0	38	0	0	9	0	4	0	2	0	0	15	0	6	0	267	0	47	0	0	27	0	2	1
9d9887418d8c4114a34eb061e37b55f3_rep;size=1206;	k__Bacteria	p__Proteobacteria	c__Alphaproteobacteria	o__Rhodobacterales	f__Rhodobacteraceae	f__Rhodobacteraceae	f__Rhodobacteraceae	14	0	6	1	0	0	2	47	0	0	0	0	0	0	0	10	1	2	0	0	0	8	0	0	2	1	26	40	11	0	8	0	2	1	22	25	19	0	0	12	0	28
a3a83d3f483c775b59c32b2cb8ad6ef9_rep;size=1203;	k__Bacteria	p__Proteobacteria	c__Alphaproteobacteria	o__Sphingomonadales	f__Sphingomonadaceae	g__Polymorphobacter	g__Polymorphobacter	0	420	0	29	0	0	0	0	0	0	0	0	0	0	0	0	0	0	0	3	0	0	0	0	4	0	0	0	3	1	0	22	8	1	0	0	0	0	64	0	0	0
e00d00df6e9897f2ab3b1b0fae60d9fc_rep;size=1203;	k__Bacteria	p__Proteobacteria	c__Alphaproteobacteria	o__Rhizobiales	f__Xanthobacteraceae	g__Xanthobacter	Ambiguous_taxa	0	508	0	0	0	0	0	0	0	0	0	0	0	0	0	0	0	0	0	0	0	0	0	0	1	0	0	0	5	0	0	0	0	0	0	0	0	0	0	0	0	0
24cab470b766bff5623d565501dfb7b1_rep;size=1199;	Unassigned	Unassigned	Unassigned	Unassigned	Unassigned	Unassigned	Unassigned	7	1	2	3	0	0	0	2	2	2	6	0	0	0	0	3	0	0	3	0	3	2	3	0	12	3	0	48	6	0	1	0	7	1	21	13	135	0	0	5	0	8
d3851d6d02378a335db4fa756d717ae4_rep;size=1194;	k__Bacteria	p__Bacteroidetes	c__Bacteroidia	o__Cytophagales	f__Hymenobacteraceae	g__Hymenobacter	s__uncultured bacterium	0	0	0	0	0	0	0	0	618	0	0	0	0	0	0	0	0	0	1	0	0	0	0	0	0	0	0	0	0	1	0	0	0	0	0	0	0	0	0	0	0	0
a0bafd7dd5815dc93950a62afaa60dcd_rep;size=1192;	Unassigned	Unassigned	Unassigned	Unassigned	Unassigned	Unassigned	Unassigned	0	34	0	41	0	6	2	1	64	0	1	0	0	0	0	0	80	4	3	69	23	2	1	38	0	0	0	0	12	3	2	4	0	1	0	0	2	0	0	1	0	0
eec17a7f630fae02dc8448fc42c2168b_rep;size=1190;	k__Bacteria	p__Proteobacteria	c__Alphaproteobacteria	o__Sphingomonadales	f__Sphingomonadaceae	g__Sphingomonas	Ambiguous_taxa	9	0	0	6	1	8	0	1	9	0	91	0	0	0	0	14	4	0	44	2	177	0	1	0	4	0	0	8	0	1	0	0	19	1	1	3	16	0	2	10	0	0
52d6fae91fe613402b5eb064db422d2a_rep;size=1178;	k__Bacteria	p__Proteobacteria	c__Alphaproteobacteria	o__Caulobacterales	f__Caulobacteraceae	g__Caulobacter	Ambiguous_taxa	0	43	0	16	0	54	4	0	0	0	0	0	0	3	15	1	34	1	2	329	0	7	0	5	0	0	1	0	4	4	0	2	0	8	0	0	0	0	13	0	0	2
ea61b233d2a6f31cac48d4aafb2c1dd5_rep;size=1174;	k__Bacteria	p__Proteobacteria	c__Gammaproteobacteria	o__Betaproteobacteriales	f__Burkholderiaceae	g__Variovorax	Ambiguous_taxa	8	1	14	0	2	0	0	2	2	1	9	0	0	3	0	3	9	4	1	0	2	4	0	7	20	29	5	3	11	0	3	0	6	1	27	6	12	0	1	12	1	21
7a5a5342cb572399e5d9945c5c988e8b_rep;size=1174;	Unassigned	Unassigned	Unassigned	Unassigned	Unassigned	Unassigned	Unassigned	26	0	1	9	2	0	0	3	0	0	4	8	0	2	0	9	0	7	2	0	5	1	4	0	6	2	6	23	10	0	7	1	4	1	2	24	14	2	0	8	6	0
49f2642bd457cfd8ad44b2e31cd2dde8_rep;size=1154;	k__Bacteria	p__Actinobacteria	c__Actinobacteria	o__Micrococcales	f__Microbacteriaceae	g__Microbacterium	Ambiguous_taxa	6	1	2	4	12	0	5	16	1	0	0	37	3	19	0	0	1	65	0	0	0	6	11	0	1	65	5	5	13	1	2	0	0	5	73	19	1	76	13	5	9	24
bdea8e951b3c26d8c957cf720f4f9833_rep;size=1149;	k__Bacteria	p__Actinobacteria	c__Actinobacteria	o__Micrococcales	f__Micrococcaceae	f__Micrococcaceae	f__Micrococcaceae	5	0	12	1	1	0	4	16	0	0	0	20	0	8	0	9	0	13	0	0	0	35	2	1	3	14	34	14	3	0	5	0	3	0	19	7	10	10	1	8	15	11
6c13c5bec8593670a2ae9cf38cc15ee6_rep;size=1148;	Unassigned	Unassigned	Unassigned	Unassigned	Unassigned	Unassigned	Unassigned	0	2	0	13	0	20	0	0	17	3	432	0	0	0	38	3	0	0	61	3	51	0	0	0	6	0	0	0	0	0	0	0	0	0	0	2	0	2	0	4	0	0
5fa09271e4605737ea29428cda586cbf_rep;size=1140;	k__Bacteria	p__Actinobacteria	c__Actinobacteria	o__Micrococcales	f__Micrococcaceae	f__Micrococcaceae	f__Micrococcaceae	9	0	7	2	0	0	9	20	0	0	0	10	0	15	0	22	0	17	1	0	0	5	3	2	4	31	9	11	6	0	9	0	5	4	21	1	7	12	0	11	15	5
7b528729f115337e009a0fc01a1dbee4_rep;size=1139;	Unassigned	Unassigned	Unassigned	Unassigned	Unassigned	Unassigned	Unassigned	20	0	0	0	0	6	0	10	1	1	6	0	0	2	3	24	7	3	0	0	2	0	11	5	4	3	2	27	5	1	10	0	12	0	8	11	20	5	0	27	15	5
a9331c6a071f284f9314aaab6f0c7453_rep;size=1137;	k__Bacteria	p__Proteobacteria	c__Alphaproteobacteria	o__Rhodobacterales	f__Rhodobacteraceae	g__Paracoccus	g__Paracoccus	5	2	16	3	0	0	7	12	1	1	0	1	1	2	0	44	8	1	0	0	1	23	7	0	4	1	35	15	24	0	12	1	4	2	2	66	12	0	2	82	4	2
3c64367000941b03d314c456a7097ed5_rep;size=1127;	k__Bacteria	p__Proteobacteria	c__Alphaproteobacteria	o__Acetobacterales	f__Acetobacteraceae	g__Roseomonas	s__Roseomonas gilardii subsp. rosea	7	13	0	4	1	0	0	3	30	0	0	1	0	7	0	4	1	1	0	0	3	2	4	0	7	1	0	6	182	0	1	0	5	0	4	45	1	0	1	19	0	2
8d439b9f4dedfa84f16c060535825080_rep;size=1127;	Unassigned	Unassigned	Unassigned	Unassigned	Unassigned	Unassigned	Unassigned	22	1	2	6	0	3	1	3	3	1	11	1	1	1	0	6	7	0	5	0	18	0	5	2	9	1	3	14	8	1	7	3	12	0	2	15	18	2	2	10	5	5
6308a825f7928b047c66f7473518c692_rep;size=1126;	k__Bacteria	p__Proteobacteria	c__Alphaproteobacteria	o__Rhodobacterales	f__Rhodobacteraceae	g__Paracoccus	g__Paracoccus	9	0	2	4	0	1	0	9	0	0	0	0	3	8	0	45	6	2	2	0	1	4	6	9	3	1	17	20	8	0	11	1	3	1	1	52	17	0	2	110	0	3
ac8195c3decdfd4fdf2113d253050c4b_rep;size=1122;	k__Bacteria	p__Proteobacteria	c__Gammaproteobacteria	o__Pseudomonadales	f__Moraxellaceae	g__Alkanindiges	g__Alkanindiges	0	0	0	0	0	0	0	0	0	0	0	0	0	1	0	3	0	0	0	0	0	0	16	0	0	3	0	0	0	0	0	0	0	0	0	0	0	0	0	0	0	0
14dcc9711b4c1a06ab6053c3619f2875_rep;size=1114;	k__Bacteria	p__Proteobacteria	c__Alphaproteobacteria	o__Rickettsiales	f__Mitochondria	f__Mitochondria	f__Mitochondria	0	0	0	0	0	0	0	0	0	0	0	1	0	0	0	0	0	5	0	0	0	0	105	6	0	42	0	0	0	0	0	0	3	9	17	0	0	67	0	0	0	0
c4ab610d4f5c26ea4a23dac129184039_rep;size=1113;	k__Bacteria	p__Proteobacteria	c__Alphaproteobacteria	o__Sphingomonadales	f__Sphingomonadaceae	g__Sphingomonas	g__Sphingomonas	5	0	0	0	0	0	1	0	0	2	5	0	0	0	0	0	1	0	9	0	32	0	0	0	3	0	0	0	0	0	0	0	4	1	1	7	3	0	6	1	0	0
6dde1a55bdd920ec63a51595a70dc43d_rep;size=1113;	Unassigned	Unassigned	Unassigned	Unassigned	Unassigned	Unassigned	Unassigned	4	9	1	5	0	41	1	1	10	3	1	0	0	0	13	0	24	0	5	1	55	2	1	3	2	0	0	5	5	4	4	4	3	0	0	24	4	0	2	0	0	0
bc1d11206a4fb7880b8daf8bc9afbfb9_rep;size=1109;	k__Bacteria	p__Actinobacteria	c__Actinobacteria	o__Micrococcales	f__Beutenbergiaceae	g__metagenome	s__metagenome	0	1	22	4	0	0	10	41	0	0	0	75	5	17	0	7	1	54	0	0	0	22	8	4	0	4	79	0	17	0	30	0	0	2	14	34	0	15	0	11	32	29
4c38cd1845788c9ca13ca9c638637e2b_rep;size=1102;	Unassigned	Unassigned	Unassigned	Unassigned	Unassigned	Unassigned	Unassigned	1	0	0	5	0	7	0	0	22	0	183	0	0	0	0	3	2	0	259	4	73	0	0	0	5	0	0	2	0	0	0	1	25	0	0	2	6	0	0	9	0	0
192ac77e591f6df57330b6c798454220_rep;size=1098;	k__Bacteria	p__Actinobacteria	c__Actinobacteria	o__Micrococcales	f__Micrococcaceae	g__Kocuria	g__Kocuria	33	2	10	4	2	1	6	18	0	2	0	12	18	16	0	20	9	26	1	0	0	16	5	10	5	21	24	5	9	1	16	1	12	3	13	8	6	7	5	8	22	21
8ab026918d751b6b8c63f796df1ab89e_rep;size=1095;	k__Bacteria	p__Patescibacteria	c__Saccharimonadia	o__Saccharimonadales	o__Saccharimonadales	o__Saccharimonadales	o__Saccharimonadales	2	62	0	0	4	0	0	0	0	0	1	3	0	0	1	0	0	1	0	1	0	0	3	0	0	0	1	2	20	0	5	7	1	17	0	2	0	0	4	0	6	3
baf6443c884724d2242ebd56c8c9c741_rep;size=1089;	k__Bacteria	p__Proteobacteria	c__Alphaproteobacteria	o__Sphingomonadales	f__Sphingomonadaceae	g__Sphingomonas	g__Sphingomonas	5	0	0	31	0	12	0	0	4	0	47	0	0	0	2	14	0	2	74	0	6	0	6	0	2	0	0	1	0	0	2	0	35	0	1	0	3	0	0	6	0	0
f8ccb27461454ce88d5cad3bac9b0c1e_rep;size=1084;	k__Bacteria	p__Proteobacteria	c__Alphaproteobacteria	o__Caulobacterales	f__Caulobacteraceae	g__Brevundimonas	g__Brevundimonas	0	8	0	6	0	53	0	1	4	0	3	0	4	0	2	0	28	0	2	1	15	1	1	4	2	0	0	4	14	2	2	0	5	0	2	12	2	0	0	3	2	0
4538d893218ff544c3381f7d73c1bcd3_rep;size=1084;	Unassigned	Unassigned	Unassigned	Unassigned	Unassigned	Unassigned	Unassigned	1	0	33	0	2	0	2	32	0	0	0	4	8	8	0	44	2	13	0	0	0	58	7	10	2	3	116	6	8	0	13	0	2	0	3	26	2	1	1	40	11	22
1b79317e8f15138dab5094c1af2d8256_rep;size=1078;	Unassigned	Unassigned	Unassigned	Unassigned	Unassigned	Unassigned	Unassigned	6	9	1	6	0	61	0	1	1	0	2	0	1	0	129	0	19	0	16	0	16	0	0	2	1	1	0	10	15	2	4	0	6	3	1	8	15	0	1	2	0	0
e1d4666dbae85a9af6393f4f1a8519ef_rep;size=1077;	k__Bacteria	p__Proteobacteria	c__Alphaproteobacteria	o__Acetobacterales	f__Acetobacteraceae	g__Roseomonas	g__Roseomonas	2	0	1	0	3	0	9	5	0	1	1	0	0	36	0	17	0	15	0	0	0	0	4	0	6	4	7	4	6	0	0	0	29	0	0	11	9	0	2	24	3	17
10d245209b9832768e1454c745f6a128_rep;size=1072;	k__Bacteria	p__Proteobacteria	c__Alphaproteobacteria	o__Rhodobacterales	f__Rhodobacteraceae	f__Rhodobacteraceae	f__Rhodobacteraceae	0	0	4	0	1	0	6	10	1	0	0	0	0	0	0	20	17	11	2	0	0	1	0	0	0	11	8	12	4	0	4	0	0	1	25	228	14	2	9	25	0	11
cbd55aed6e4972e458b7a5f124e69ddd_rep;size=1067;	k__Bacteria	p__Proteobacteria	c__Gammaproteobacteria	o__Betaproteobacteriales	f__Neisseriaceae	g__uncultured	s__uncultured bacterium	1	0	0	0	0	0	0	0	0	0	0	0	0	0	0	0	0	0	0	0	0	0	0	0	0	0	0	0	0	0	0	0	0	0	0	0	0	0	0	0	0	0
e90f9244e88a01e10efdb57cf7e6b401_rep;size=1065;	k__Bacteria	p__Proteobacteria	c__Alphaproteobacteria	o__Caulobacterales	f__Caulobacteraceae	g__Brevundimonas	g__Brevundimonas	27	4	0	12	0	41	1	0	34	0	6	0	0	0	2	2	28	2	37	0	66	0	1	1	4	0	0	10	11	1	6	1	17	0	4	11	15	0	1	2	0	0
d2a638c0314025fbbf7b7cbebfeadb7f_rep;size=1061;	k__Bacteria	p__Proteobacteria	c__Alphaproteobacteria	o__Sphingomonadales	f__Sphingomonadaceae	g__Sphingomonas	g__Sphingomonas	6	0	0	2	0	0	0	4	1	1	3	0	0	0	0	5	1	1	5	0	58	0	0	0	12	0	1	22	0	2	0	0	21	0	1	16	28	1	0	2	0	1
4d4093e2fc1402de5b4614d2fd6ea06f_rep;size=1060;	k__Bacteria	p__Proteobacteria	c__Alphaproteobacteria	o__Caulobacterales	f__Caulobacteraceae	g__Caulobacter	g__Caulobacter	0	8	0	0	0	0	0	2	3	0	0	1	1	1	0	2	4	3	0	377	1	8	1	1	1	1	0	2	3	16	0	2	2	27	0	1	1	0	0	0	1	0
1c5f6b28002a1af90482dfa2c474f646_rep;size=1059;	k__Bacteria	p__Actinobacteria	c__Actinobacteria	o__Micrococcales	f__Micrococcaceae	g__Kocuria	g__Kocuria	64	0	8	7	0	0	0	12	0	0	1	14	64	8	0	0	11	31	0	0	0	15	5	25	7	11	36	13	4	0	21	1	1	3	3	6	13	10	3	8	9	42
06d38b69f4358a6f4b8471993eb55844_rep;size=1058;	Unassigned	Unassigned	Unassigned	Unassigned	Unassigned	Unassigned	Unassigned	60	0	1	0	0	0	7	9	0	0	0	0	1	42	0	172	2	11	0	0	0	0	2	1	5	9	2	9	5	3	56	0	8	0	1	3	13	0	2	33	21	7
1efa980e1a32ecfa02f7b4ce35800af7_rep;size=1052;	k__Bacteria	p__Proteobacteria	c__Gammaproteobacteria	o__Betaproteobacteriales	f__Burkholderiaceae	f__Burkholderiaceae	f__Burkholderiaceae	0	0	0	0	0	0	0	0	550	0	0	0	0	0	0	0	0	0	0	0	0	0	0	0	0	0	0	0	0	0	0	0	0	0	0	0	0	0	0	0	0	0
95afa02d506302dfd163a76feff982ea_rep;size=1052;	k__Bacteria	p__Proteobacteria	c__Alphaproteobacteria	o__Sphingomonadales	f__Sphingomonadaceae	g__Altererythrobacter	g__Altererythrobacter	0	0	0	1	2	0	0	0	0	0	3	0	0	0	0	8	0	0	2	0	31	0	4	0	5	0	0	39	3	0	0	0	8	0	2	36	21	0	0	4	1	1
5e07cb6ecf8f89476207a2644908d030_rep;size=1034;	k__Bacteria	p__Cyanobacteria	c__Oxyphotobacteria	o__Nostocales	f__Chroococcidiopsaceae	g__uncultured	s__uncultured bacterium	1	0	0	0	4	0	0	0	1	10	0	0	0	3	0	0	0	0	0	0	1	0	0	0	7	0	0	73	0	1	0	0	18	0	0	0	19	0	0	2	0	0
95ffb8d778917057991186d5bc37ed50_rep;size=1032;	k__Bacteria	p__Proteobacteria	c__Alphaproteobacteria	o__Sphingomonadales	f__Sphingomonadaceae	g__Sphingobium	Ambiguous_taxa	15	4	0	0	1	1	1	0	0	1	29	0	0	1	0	0	0	0	3	12	8	0	0	2	3	1	0	21	4	0	1	0	10	0	4	13	2	0	0	0	0	1
334b1c6ea2d2cdb14f2804cb9cf9bea7_rep;size=1030;	Unassigned	Unassigned	Unassigned	Unassigned	Unassigned	Unassigned	Unassigned	0	3	119	0	0	0	6	35	0	0	0	107	0	2	0	0	2	7	0	0	0	130	0	12	0	0	331	0	2	3	18	2	0	0	0	4	0	0	1	3	16	27
fc8fe343b0a33f6e3ebffc1ba3056390_rep;size=1030;	k__Bacteria	p__Proteobacteria	c__Alphaproteobacteria	o__Rhodobacterales	f__Rhodobacteraceae	g__Rubellimicrobium	s__uncultured bacterium	9	0	12	0	21	0	7	2	2	6	0	6	0	13	0	11	3	192	0	0	3	0	12	0	7	0	18	16	15	1	0	0	4	0	1	8	11	0	3	14	0	13
94ec31a6cfaafa2d831530e1f221e398_rep;size=1030;	Unassigned	Unassigned	Unassigned	Unassigned	Unassigned	Unassigned	Unassigned	30	0	26	1	0	0	9	21	1	0	0	5	0	2	0	9	1	14	0	0	0	24	5	0	4	3	45	21	16	0	16	1	0	0	10	36	23	0	2	34	8	24
7403fbf4643c39e01e63f60fdaeef15b_rep;size=1028;	k__Bacteria	p__Actinobacteria	c__Actinobacteria	o__Micrococcales	f__Dermacoccaceae	Ambiguous_taxa	Ambiguous_taxa	24	0	1	7	4	0	8	15	1	1	0	12	0	41	0	24	0	8	1	0	0	11	32	0	0	33	5	8	4	5	24	0	6	14	27	1	1	1	3	7	37	13
da89a8bbf46e668c6087d9ac6bd0a493_rep;size=1027;	k__Bacteria	p__Firmicutes	c__Bacilli	o__Bacillales	f__Bacillaceae	g__Bacillus	Ambiguous_taxa	2	0	2	9	2	2	11	4	3	2	2	50	0	13	0	3	0	14	0	0	1	2	2	0	3	0	10	151	2	1	56	3	8	10	1	4	8	0	2	4	39	6
a7c0d34d22b356fcb4f37fd59f3082fe_rep;size=1026;	k__Bacteria	p__Proteobacteria	c__Alphaproteobacteria	o__Rhodobacterales	f__Rhodobacteraceae	f__Rhodobacteraceae	f__Rhodobacteraceae	6	0	3	0	2	0	10	26	0	0	3	6	0	7	0	4	0	6	0	0	0	0	1	1	6	7	6	32	12	1	4	0	5	25	18	17	18	0	4	15	0	12
7b6094d25c254f7af0cd231f017f16e2_rep;size=1024;	k__Bacteria	p__Proteobacteria	c__Alphaproteobacteria	o__Sphingomonadales	f__Sphingomonadaceae	g__Sphingomonas	Ambiguous_taxa	0	0	0	16	0	5	0	0	0	19	38	0	0	0	4	8	0	0	0	0	0	0	24	4	0	1	2	0	0	0	0	1	4	0	1	1	0	1	0	0	0	0
546a45cf9f97121ae1639526cc24a1a1_rep;size=1024;	Unassigned	Unassigned	Unassigned	Unassigned	Unassigned	Unassigned	Unassigned	26	0	2	3	0	3	2	4	0	4	3	1	0	6	0	17	15	4	2	0	18	1	7	15	17	1	5	17	11	0	7	0	18	0	1	11	16	6	1	6	14	10
7ee2051d6429591e9b83010a858185b4_rep;size=1022;	Unassigned	Unassigned	Unassigned	Unassigned	Unassigned	Unassigned	Unassigned	63	0	2	4	0	0	3	1	0	0	0	0	5	0	0	1	10	0	0	0	0	9	1	4	1	1	3	16	36	0	6	3	2	3	6	62	22	0	0	13	2	2
6b9fb04bfcc17df2ed2103c0f26395ea_rep;size=1014;	k__Bacteria	p__Bacteroidetes	c__Bacteroidia	o__Flavobacteriales	f__Weeksellaceae	g__Chryseobacterium	s__bacterium	1	0	0	3	6	0	2	5	0	0	1	4	0	3	0	0	0	38	0	0	1	0	22	1	0	23	2	14	6	5	0	2	5	2	63	5	7	43	4	2	2	2
c6d9d44f8267f0e0cb95e43458777858_rep;size=1009;	k__Bacteria	p__Actinobacteria	c__Actinobacteria	o__Corynebacteriales	f__Dietziaceae	g__Dietzia	g__Dietzia	0	0	1	0	6	0	3	4	1	0	0	35	0	0	0	0	0	5	0	1	0	2	4	6	0	5	11	0	1	608	9	2	1	104	0	10	0	1	1	0	4	8
4d3ab6fd27508a992670856c6e380953_rep;size=996;	k__Bacteria	p__Proteobacteria	c__Alphaproteobacteria	o__Sphingomonadales	f__Sphingomonadaceae	g__Sphingomonas	Ambiguous_taxa	4	0	0	19	0	145	0	1	0	0	28	0	4	0	1	0	7	0	0	0	0	0	13	14	0	0	0	4	0	0	10	3	13	0	0	1	0	1	0	0	9	0
f5f998a060cbe1d99a7e4494c188b70f_rep;size=994;	k__Bacteria	p__Firmicutes	c__Bacilli	o__Lactobacillales	f__Enterococcaceae	g__Enterococcus	g__Enterococcus	3	0	1	2	0	0	1	5	0	0	0	5	0	5	0	1	0	2	0	0	0	0	0	0	0	1	0	11	0	0	7	0	7	2	3	0	2	0	0	0	3	0
682ee0d04c5e96a8d407135bd3aebe0c_rep;size=994;	Unassigned	Unassigned	Unassigned	Unassigned	Unassigned	Unassigned	Unassigned	15	1	0	6	0	2	2	0	1	0	1	0	0	0	0	3	4	0	2	0	3	0	0	4	2	0	0	1	51	0	6	0	4	2	1	2	3	0	0	3	0	0
73c50d9f507fea6efc071156c0ce5799_rep;size=991;	k__Bacteria	p__Proteobacteria	c__Alphaproteobacteria	o__Rhizobiales	f__Beijerinckiaceae	g__Methylobacterium	Ambiguous_taxa	0	0	0	1	0	27	1	0	1	172	165	0	0	0	30	0	0	0	5	7	3	0	0	0	0	0	0	1	1	0	0	0	0	1	0	0	0	0	0	3	0	0
4e174e0fae443626688d8793989d5946_rep;size=977;	k__Bacteria	p__Proteobacteria	c__Alphaproteobacteria	o__Rhodobacterales	f__Rhodobacteraceae	g__Paracoccus	g__Paracoccus	6	0	3	1	0	0	0	4	0	0	5	1	0	1	0	1	0	5	4	0	1	4	1	1	5	4	2	26	8	0	1	1	3	1	13	9	58	0	0	3	2	10
c8c27991fc4b9dbaf393e756a8480704_rep;size=975;	k__Bacteria	p__Firmicutes	c__Clostridia	o__Clostridiales	f__Clostridiaceae 1	g__Clostridium sensu stricto 13	g__Clostridium sensu stricto 13	4	0	0	3	2	0	3	0	0	0	0	0	0	0	0	0	1	0	0	515	0	0	4	0	0	0	1	2	0	81	0	5	4	90	4	2	0	0	3	1	0	3
55f5f8ea1108b89acb828e049abb9231_rep;size=975;	k__Bacteria	p__Actinobacteria	c__Actinobacteria	o__Micrococcales	f__Micrococcaceae	g__Kocuria	g__Kocuria	38	0	1	0	1	0	2	9	0	2	0	3	0	24	0	33	1	22	0	0	0	4	48	3	8	39	8	5	10	0	18	0	18	13	9	7	4	5	11	18	33	11
b7fb8af519a8515cd8f875eb9b0bb12c_rep;size=962;	k__Bacteria	p__Actinobacteria	c__Actinobacteria	o__Corynebacteriales	f__Dietziaceae	g__Dietzia	g__Dietzia	0	0	0	0	2	0	90	0	0	0	0	18	0	9	7	10	0	3	0	1	0	4	3	0	0	12	0	0	0	288	0	0	1	82	8	0	1	1	0	0	0	0
ad5692b9dfec40320815224b9771b214_rep;size=956;	k__Bacteria	p__Proteobacteria	c__Alphaproteobacteria	o__Caulobacterales	f__Caulobacteraceae	g__Brevundimonas	Ambiguous_taxa	7	13	0	3	0	11	0	0	1	0	1	0	9	0	2	0	27	0	3	1	11	1	0	3	0	0	0	0	35	2	0	4	1	0	2	8	3	0	0	0	0	0
319fc8009bf2d9999fb22021776ed4b9_rep;size=954;	Unassigned	Unassigned	Unassigned	Unassigned	Unassigned	Unassigned	Unassigned	4	2	0	18	0	0	1	2	1	1	4	0	0	0	1	11	0	2	0	1	3	1	1	0	3	0	0	15	12	0	0	1	4	0	2	109	8	0	0	12	0	2
69d4d654db67d027bd1512bc4ca830e8_rep;size=950;	k__Bacteria	p__Proteobacteria	c__Gammaproteobacteria	o__Enterobacteriales	f__Enterobacteriaceae	f__Enterobacteriaceae	f__Enterobacteriaceae	2	0	104	0	0	0	1	6	0	0	0	3	0	0	0	0	2	2	0	0	0	0	2	1	637	3	0	0	2	3	0	0	2	0	4	0	1	0	0	1	1	1
b6d327f26c3cbe8e4e05865532300acb_rep;size=937;	k__Bacteria	p__Proteobacteria	c__Gammaproteobacteria	o__Betaproteobacteriales	f__Burkholderiaceae	g__Acidovorax	g__Acidovorax	0	3	0	35	0	4	0	0	2	0	0	0	1	0	0	0	95	0	0	17	0	0	1	0	0	0	0	1	0	0	0	0	2	0	0	0	0	0	0	0	0	1
deccab7252e59f51f138edb8e94037df_rep;size=936;	Unassigned	Unassigned	Unassigned	Unassigned	Unassigned	Unassigned	Unassigned	21	2	0	12	0	41	0	0	17	1	5	0	0	0	2	1	24	0	35	1	60	0	0	1	2	0	0	2	12	2	0	4	7	4	0	8	6	0	2	0	4	0
06b813504b5cc9d55f0d3bda7e4f8162_rep;size=932;	Unassigned	Unassigned	Unassigned	Unassigned	Unassigned	Unassigned	Unassigned	4	3	75	0	0	0	0	56	0	0	0	31	2	2	0	0	8	19	0	0	0	43	0	8	1	1	126	5	4	1	13	3	0	0	5	11	1	1	1	1	32	100
18d1ac2f7f8398ab13d4b94c7327e86b_rep;size=924;	k__Bacteria	p__Proteobacteria	c__Alphaproteobacteria	o__Rhizobiales	f__Xanthobacteraceae	g__Ancylobacter	Ambiguous_taxa	0	291	0	0	0	0	0	0	0	0	0	0	0	0	0	0	0	0	0	0	0	0	0	0	0	0	2	0	0	0	0	0	0	0	0	0	0	0	0	0	0	0
91ee4c3e8103113219e85b1c2024eb31_rep;size=923;	k__Bacteria	p__Proteobacteria	c__Gammaproteobacteria	o__Betaproteobacteriales	f__Burkholderiaceae	g__Acidovorax	Ambiguous_taxa	0	33	0	12	0	0	2	0	0	0	0	0	1	0	0	0	51	0	0	479	0	0	0	0	2	0	0	0	0	0	38	0	2	0	0	3	0	0	1	0	1	1
1dd38b8537fc7ea236d199b8c673997c_rep;size=921;	Unassigned	Unassigned	Unassigned	Unassigned	Unassigned	Unassigned	Unassigned	8	1	0	0	0	0	0	0	0	0	0	0	0	0	0	7	3	0	1	1	4	0	0	0	1	0	0	1	50	0	4	0	6	4	0	2	2	0	2	6	0	0
d2dade14bc29afb9a93761390c984268_rep;size=915;	k__Bacteria	p__Proteobacteria	c__Alphaproteobacteria	o__Acetobacterales	f__Acetobacteraceae	g__Roseomonas	g__Roseomonas	2	2	0	2	6	2	7	2	0	0	29	1	0	11	2	13	0	3	0	10	10	0	7	0	7	0	2	9	9	8	0	0	11	12	1	0	2	2	1	42	0	0
a805e0363ffbb96707460188ab17fd17_rep;size=913;	k__Bacteria	p__Proteobacteria	c__Alphaproteobacteria	o__Rhizobiales	f__Rhizobiaceae	g__Allorhizobium-Neorhizobium-Pararhizobium-Rhizobium	g__Allorhizobium-Neorhizobium-Pararhizobium-Rhizobium	1	10	0	10	0	1	3	1	4	0	16	1	0	1	11	0	0	1	0	36	0	6	3	0	6	2	1	1	68	0	3	5	2	0	18	0	0	2	9	0	0	1
c043b78be2985f4391994daa1bdfb346_rep;size=911;	Unassigned	Unassigned	Unassigned	Unassigned	Unassigned	Unassigned	Unassigned	8	0	0	2	1	1	1	4	2	3	8	0	0	1	0	7	0	2	3	0	4	1	5	0	12	3	1	26	4	0	0	0	20	0	1	2	18	3	1	2	3	1
35169be17719e7bc8b026d7215c6312c_rep;size=907;	k__Bacteria	p__Proteobacteria	c__Alphaproteobacteria	o__Acetobacterales	f__Acetobacteraceae	g__Roseomonas	Ambiguous_taxa	1	138	2	43	0	1	0	1	0	0	0	1	0	0	0	2	78	1	0	1	0	2	1	20	1	4	0	3	5	0	34	9	2	1	3	1	2	0	7	6	0	1
71fd06bf8c25e42ed875df9c9ed704f7_rep;size=903;	k__Bacteria	p__Proteobacteria	c__Alphaproteobacteria	o__Caulobacterales	f__Caulobacteraceae	g__Brevundimonas	g__Brevundimonas	0	0	0	0	1	5	9	0	0	58	0	0	0	0	580	2	0	0	0	0	0	0	0	0	0	0	0	0	0	14	0	0	0	3	0	3	0	0	0	0	0	0
01522204b4d400a5a35d98ed9d1c037d_rep;size=901;	k__Bacteria	p__Proteobacteria	c__Alphaproteobacteria	o__Rhizobiales	f__Beijerinckiaceae	g__Methylobacterium	g__Methylobacterium	5	0	0	2	2	5	2	0	17	327	4	0	0	0	3	5	0	0	31	0	5	0	2	0	1	0	0	3	1	0	0	0	4	1	0	2	1	1	0	1	0	1
0e1f5d2e0e6deb435925c8f7f29574b6_rep;size=899;	Unassigned	Unassigned	Unassigned	Unassigned	Unassigned	Unassigned	Unassigned	8	0	0	2	2	0	0	2	0	0	0	10	0	0	0	0	0	27	0	0	0	0	0	2	1	202	2	4	5	0	1	0	1	1	128	7	12	7	3	0	0	4
16fac8a5cfd19eeecb4cf744e47c4cbd_rep;size=899;	k__Bacteria	p__Firmicutes	c__Bacilli	o__Bacillales	f__Planococcaceae	g__Planococcus	g__Planococcus	31	0	2	1	0	0	132	1	0	0	0	11	0	0	0	0	0	3	0	0	0	23	0	0	6	0	11	37	3	1	1	0	5	0	3	45	7	1	1	1	0	15
6614783863b857fce2786d6b034fdf39_rep;size=895;	k__Bacteria	p__Proteobacteria	c__Alphaproteobacteria	o__Sphingomonadales	f__Sphingomonadaceae	g__Sphingomonas	Ambiguous_taxa	0	119	2	0	0	1	0	0	0	0	0	0	0	3	0	0	0	1	0	5	3	0	0	1	0	0	0	0	1	5	7	0	1	0	0	9	0	0	0	0	21	0
b249e349618ad5e9d110923006a90b0a_rep;size=895;	k__Bacteria	p__Bacteroidetes	c__Bacteroidia	o__Flavobacteriales	f__Flavobacteriaceae	g__Flavobacterium	Ambiguous_taxa	0	2	0	0	0	0	0	0	0	0	0	0	0	0	0	0	0	0	0	837	0	0	0	0	0	0	0	0	0	2	0	0	0	0	0	0	0	0	0	0	0	0
2c9458ba59d15e6214278060cfc7f823_rep;size=895;	k__Bacteria	p__Actinobacteria	c__Actinobacteria	o__Micrococcales	f__Micrococcaceae	f__Micrococcaceae	f__Micrococcaceae	5	0	7	0	0	0	6	15	0	0	1	4	0	6	0	9	1	18	0	0	0	19	2	0	6	12	7	17	6	0	6	0	5	0	7	16	23	1	1	11	16	5
85406f5cbce0248b3e43213d10c14d0d_rep;size=892;	k__Bacteria	p__Actinobacteria	c__Actinobacteria	o__Micrococcales	f__Dermabacteraceae	g__Brachybacterium	Ambiguous_taxa	3	0	1	1	4	0	9	34	0	0	0	12	0	43	0	58	0	16	2	0	0	17	12	1	1	4	2	7	5	2	1	0	2	1	14	0	0	16	1	21	5	11
2887dd4c6ef3fd36c906b9d964e6d843_rep;size=889;	Unassigned	Unassigned	Unassigned	Unassigned	Unassigned	Unassigned	Unassigned	1	0	0	0	74	0	0	0	0	0	0	0	0	0	0	0	0	0	0	0	0	0	0	0	0	0	0	2	0	31	0	0	1	0	0	0	1	0	34	0	0	0
9d2b0969a41b130169d9c3874fe9ff4f_rep;size=888;	k__Bacteria	p__Firmicutes	c__Bacilli	o__Lactobacillales	f__Carnobacteriaceae	f__Carnobacteriaceae	f__Carnobacteriaceae	0	0	52	0	0	0	284	29	0	0	0	10	0	9	0	0	0	7	0	6	0	8	0	0	0	0	300	5	2	0	0	0	0	0	0	9	0	0	0	6	35	13
ddc4949a0564d003113dc6ba8e34bad0_rep;size=888;	k__Bacteria	p__Patescibacteria	c__Saccharimonadia	o__Saccharimonadales	f__Saccharimonadaceae	g__uncultured bacterium	s__uncultured bacterium	48	1	9	3	11	0	3	14	0	0	0	10	0	3	0	0	0	30	0	0	0	29	0	1	2	30	14	29	0	2	12	0	1	0	18	8	31	5	3	3	0	70
53235b96edb4e50a9fd5c980ad465596_rep;size=887;	k__Bacteria	p__Proteobacteria	c__Alphaproteobacteria	o__Rhodobacterales	f__Rhodobacteraceae	g__Ketogulonicigenium	g__Ketogulonicigenium	0	0	16	61	0	0	6	20	2	0	0	5	0	1	0	0	5	8	0	0	0	111	3	0	0	0	22	0	0	0	14	4	0	0	1	2	1	0	0	2	2	6
240dd67a6e18c49c6d82e188458db432_rep;size=881;	k__Bacteria	p__Proteobacteria	c__Gammaproteobacteria	o__Betaproteobacteriales	f__Burkholderiaceae	g__Massilia	g__Massilia	3	0	1	1	1	2	5	3	1	0	0	0	0	7	0	21	2	0	2	0	0	0	0	1	0	0	2	7	8	0	1	6	9	6	1	1	11	0	4	9	0	0
a4fa1a76c5545de1ec951f1e9f15daa7_rep;size=880;	k__Bacteria	p__Actinobacteria	c__Actinobacteria	o__Micrococcales	f__Micrococcaceae	f__Micrococcaceae	f__Micrococcaceae	38	0	1	0	0	0	1	9	0	0	0	1	0	19	0	46	5	21	0	0	1	2	52	3	5	25	5	13	17	0	16	0	8	5	9	9	6	1	4	10	39	16
5b9cb01d8cc24ae1d471e8ee56e767e0_rep;size=877;	k__Bacteria	p__Actinobacteria	c__Actinobacteria	o__Micrococcales	f__Dermabacteraceae	g__Brachybacterium	Ambiguous_taxa	22	0	0	0	1	0	11	25	0	0	0	3	0	21	0	55	1	12	0	0	0	12	4	2	1	3	8	5	3	0	9	0	10	0	5	3	5	3	3	47	46	10
fd5786fee494131e7b988e6b2aac2fa6_rep;size=874;	Unassigned	Unassigned	Unassigned	Unassigned	Unassigned	Unassigned	Unassigned	1	0	0	5	0	60	0	0	7	112	103	0	0	0	6	0	0	0	67	2	10	0	2	0	1	0	0	0	0	0	0	0	1	0	0	2	1	0	1	0	0	0
28400033019ee7056b4fc6040af066cd_rep;size=872;	k__Bacteria	p__Proteobacteria	c__Gammaproteobacteria	o__Pseudomonadales	f__Moraxellaceae	g__Acinetobacter	g__Acinetobacter	0	0	0	103	1	0	0	4	0	0	0	0	0	4	0	3	169	16	0	1	0	1	23	2	0	5	0	63	1	2	2	0	4	175	15	0	0	0	0	0	0	1
a68983dfc46cf6bc71c03b266cc53968_rep;size=870;	Unassigned	Unassigned	Unassigned	Unassigned	Unassigned	Unassigned	Unassigned	21	0	2	1	1	4	0	6	0	2	3	0	2	4	0	29	1	1	1	0	1	1	8	3	4	4	3	21	7	2	11	0	11	1	4	12	12	5	0	23	8	2
ed1417a832074ce44e677975af2b51b4_rep;size=868;	Unassigned	Unassigned	Unassigned	Unassigned	Unassigned	Unassigned	Unassigned	0	0	0	0	0	0	0	0	1	3	0	0	0	0	0	0	0	0	5	0	1	0	0	0	0	0	0	1	0	7	0	0	10	2	0	0	0	0	0	0	0	0
fcf573c5e46d77c1bbc1c9e0eb2e9540_rep;size=867;	k__Bacteria	p__Proteobacteria	c__Gammaproteobacteria	o__Betaproteobacteriales	f__Burkholderiaceae	g__Massilia	g__Massilia	2	0	14	0	1	0	0	0	390	0	0	0	0	0	0	1	0	0	0	0	0	0	0	0	2	0	0	0	2	1	0	0	1	0	0	0	3	0	4	16	0	0
2cb96b650bbff922328d4fc02f0767c5_rep;size=865;	k__Bacteria	p__FBP	c__uncultured bacterium	o__uncultured bacterium	f__uncultured bacterium	g__uncultured bacterium	s__uncultured bacterium	0	21	0	0	0	38	0	0	4	0	53	0	0	0	9	0	5	0	4	18	10	2	1	11	1	0	0	0	3	2	0	2	0	2	0	11	2	0	0	3	1	0
ce692f489a43571b4427d0597d8a101d_rep;size=865;	k__Bacteria	p__Proteobacteria	c__Alphaproteobacteria	o__Sphingomonadales	f__Sphingomonadaceae	g__Sphingomonas	Ambiguous_taxa	9	0	0	3	11	2	5	11	1	0	6	0	0	8	1	11	4	11	0	0	1	2	8	2	0	11	0	17	11	0	11	0	1	2	17	3	6	3	0	30	0	4
acbb69f2765ac3cdfee0c072acb0acfc_rep;size=862;	k__Bacteria	p__Proteobacteria	c__Gammaproteobacteria	o__Betaproteobacteriales	f__Burkholderiaceae	g__Acidovorax	s__uncultured Acidovorax sp.	0	57	69	20	0	0	0	5	0	0	0	9	0	0	0	9	406	0	1	2	3	2	4	0	1	0	0	0	0	1	1	0	1	3	0	0	1	0	0	1	1	1
5ca909830a3a774a47f904b22f14c567_rep;size=862;	k__Bacteria	p__Bacteroidetes	c__Bacteroidia	o__Cytophagales	f__Hymenobacteraceae	g__Hymenobacter	g__Hymenobacter	0	32	0	12	2	0	0	0	1	0	67	1	0	0	0	0	0	0	0	0	0	4	0	2	1	0	0	1	0	0	0	0	1	0	0	2	1	0	0	0	0	1
cc13d9151ad1cfc8c72ee077713627db_rep;size=860;	k__Bacteria	p__Actinobacteria	c__Actinobacteria	o__Micrococcales	f__Microbacteriaceae	g__Gulosibacter	Ambiguous_taxa	52	0	9	10	2	1	1	16	0	1	0	11	55	5	0	0	7	20	0	0	0	23	7	17	8	1	27	7	3	0	10	1	5	0	5	2	16	1	12	0	12	19
d6774a5e62223efb9ea2dc08df173532_rep;size=859;	k__Bacteria	p__Proteobacteria	c__Alphaproteobacteria	o__Sphingomonadales	f__Sphingomonadaceae	f__Sphingomonadaceae	f__Sphingomonadaceae	0	1	0	0	0	0	1	0	31	0	2	1	0	0	0	0	0	5	2	51	7	0	0	0	2	0	0	4	1	8	2	0	0	5	0	0	0	0	0	0	0	0
d1736b399e493be7270f3bad319ecb8c_rep;size=859;	k__Bacteria	p__Actinobacteria	c__Actinobacteria	o__Frankiales	f__Nakamurellaceae	g__Nakamurella	s__uncultured Nakamurellaceae bacterium	1	8	0	1	10	0	5	0	0	0	0	8	0	0	0	1	0	2	3	1	0	1	5	0	9	0	0	2	59	31	13	0	1	95	3	9	1	0	12	2	1	0
4075897bb6c047a03023dffb6dd8517a_rep;size=859;	k__Bacteria	p__Proteobacteria	c__Alphaproteobacteria	o__Rhodobacterales	f__Rhodobacteraceae	g__uncultured	s__uncultured bacterium	43	0	0	1	2	0	0	5	0	0	3	0	0	4	0	6	0	2	1	0	2	0	2	0	2	0	0	4	1	0	8	0	3	0	1	0	17	1	0	29	0	1
7ffb7e8db67da9f99b14be3dfd4cea2e_rep;size=856;	k__Bacteria	p__Actinobacteria	c__Actinobacteria	o__Micrococcales	f__Microbacteriaceae	f__Microbacteriaceae	f__Microbacteriaceae	32	0	0	1	1	1	0	1	1	4	35	0	0	1	0	3	0	0	13	1	19	0	0	0	10	0	0	4	1	0	0	3	13	0	2	3	10	0	1	2	1	1
47449ff98aeb4a8cf8c9d20ef2f54cdc_rep;size=856;	k__Bacteria	p__Proteobacteria	c__Alphaproteobacteria	o__Rhizobiales	f__Beijerinckiaceae	g__Methylobacterium	Ambiguous_taxa	0	0	0	0	0	3	0	0	0	344	2	0	0	0	2	0	0	0	34	0	0	0	1	0	0	0	0	0	0	0	0	0	0	2	0	0	0	0	0	1	0	0
916bb5f72130c28b2e28f7bc5294b5f1_rep;size=856;	k__Bacteria	p__Proteobacteria	c__Alphaproteobacteria	o__Sphingomonadales	f__Sphingomonadaceae	g__Sphingobium	g__Sphingobium	1	71	0	8	0	5	0	1	0	0	3	1	0	3	5	0	2	3	0	7	7	7	0	2	3	10	0	28	5	0	66	19	5	3	11	12	16	1	19	0	3	4
9b0fd2c0685da3c4bdd27cb982f554ef_rep;size=856;	k__Bacteria	p__Proteobacteria	c__Alphaproteobacteria	o__Rhizobiales	f__Beijerinckiaceae	g__Methylobacterium	g__Methylobacterium	0	0	0	0	2	5	2	0	4	291	4	0	0	0	43	1	0	0	17	0	4	0	2	0	2	0	1	1	2	0	0	0	1	0	0	2	0	1	0	2	0	0
923b0473439a96a1cc141f543480576c_rep;size=855;	Unassigned	Unassigned	Unassigned	Unassigned	Unassigned	Unassigned	Unassigned	0	0	0	5	0	34	0	0	31	6	123	0	0	0	3	1	0	0	175	1	49	0	5	1	1	0	0	1	0	2	0	0	2	0	1	3	1	0	2	2	0	0
b891e57adfb270bf286f241f30cd9ea8_rep;size=849;	k__Bacteria	p__Proteobacteria	c__Alphaproteobacteria	o__Sphingomonadales	f__Sphingomonadaceae	g__Sphingobium	g__Sphingobium	1	8	0	7	0	0	3	0	0	0	0	0	0	0	1	0	0	2	0	1	16	1	1	1	0	0	0	3	5	0	10	2	4	2	1	1	0	0	1	0	2	2
689d29eb1018d44239cc6f2c17f78d0a_rep;size=845;	k__Bacteria	p__Proteobacteria	c__Gammaproteobacteria	o__Betaproteobacteriales	f__Burkholderiaceae	g__Massilia	Ambiguous_taxa	3	0	0	1	7	0	10	0	0	0	0	1	0	0	0	5	0	5	0	0	0	0	6	0	1	0	2	1	4	0	2	0	0	0	1	0	2	0	0	2	0	1
1e2f6a556f7c99df887b111a5061846c_rep;size=845;	k__Bacteria	p__Proteobacteria	c__Alphaproteobacteria	o__Sphingomonadales	f__Sphingomonadaceae	g__Sphingomonas	g__Sphingomonas	17	0	0	2	0	10	0	0	12	2	76	0	0	2	0	3	1	3	31	0	50	0	8	4	5	0	0	4	2	3	3	0	8	0	0	13	5	0	1	13	0	3
c9639bea7d996bb3702178101c37ec37_rep;size=842;	k__Bacteria	p__Proteobacteria	c__Alphaproteobacteria	o__Acetobacterales	f__Acetobacteraceae	g__Roseomonas	g__Roseomonas	2	0	0	0	0	44	0	0	4	0	0	0	0	0	22	0	0	0	15	32	0	0	1	0	0	0	0	0	0	2	0	0	0	4	0	0	0	0	0	0	0	0
b7418e551ef255350da0374530274d4d_rep;size=841;	k__Bacteria	p__Proteobacteria	c__Gammaproteobacteria	o__Betaproteobacteriales	f__Burkholderiaceae	f__Burkholderiaceae	f__Burkholderiaceae	0	12	0	18	0	2	0	0	0	0	0	0	0	0	0	0	3	0	0	378	0	0	3	0	1	0	0	0	0	4	0	1	0	0	0	0	0	0	2	0	0	0
f7e6718bcbf1ada3201138998f498c64_rep;size=838;	k__Bacteria	p__Proteobacteria	c__Alphaproteobacteria	o__Rhizobiales	f__Beijerinckiaceae	g__Methylobacterium	g__Methylobacterium	0	0	0	0	0	0	0	0	1	66	0	0	0	2	3	0	0	0	0	0	0	0	0	0	0	0	0	0	0	0	0	0	1	0	0	0	0	0	0	0	1	0
456e5863ccb0563d07fc62f0acbee42e_rep;size=838;	k__Bacteria	p__Proteobacteria	c__Alphaproteobacteria	o__Sphingomonadales	f__Sphingomonadaceae	g__Sphingomonas	g__Sphingomonas	1	0	0	18	0	43	0	0	0	0	43	0	0	0	19	2	0	0	41	0	2	0	9	0	0	0	1	2	1	0	1	0	14	0	0	6	2	1	0	6	1	0
ec07f314dabce7ad607428a0d6398262_rep;size=834;	k__Bacteria	p__Actinobacteria	c__Actinobacteria	o__Micrococcales	f__Micrococcaceae	g__Nesterenkonia	g__Nesterenkonia	0	5	103	0	0	0	0	24	0	0	0	89	1	0	0	0	2	6	0	0	0	100	0	11	0	0	247	1	4	4	10	3	0	0	0	4	0	1	0	1	9	24
45d4d945772cf51e19f949b2d5ca80a2_rep;size=828;	Unassigned	Unassigned	Unassigned	Unassigned	Unassigned	Unassigned	Unassigned	1	0	1	1	0	0	0	3	0	0	0	4	0	2	0	1	0	39	0	0	1	4	7	0	1	101	0	2	4	0	1	0	0	2	77	3	8	3	0	2	1	7
32dbb0ddd52c7433137fec9d55130a48_rep;size=827;	k__Bacteria	p__Proteobacteria	c__Gammaproteobacteria	o__Enterobacteriales	f__Enterobacteriaceae	f__Enterobacteriaceae	f__Enterobacteriaceae	0	0	0	0	0	0	0	0	0	0	0	0	0	7	0	0	5	0	0	8	0	0	29	652	0	0	0	0	4	0	1	0	0	0	1	0	0	0	0	0	0	1
136992326299a607de2f0f7457e0f67a_rep;size=820;	k__Bacteria	p__Proteobacteria	c__Alphaproteobacteria	o__Rhizobiales	f__Beijerinckiaceae	g__Methylobacterium	g__Methylobacterium	0	0	0	0	3	1	1	0	0	341	2	0	0	0	4	1	0	0	1	0	0	0	1	0	0	0	1	0	0	0	0	0	0	1	0	0	0	0	0	0	0	0
b74b4a10f44598cc40b82dea0e9f4b63_rep;size=820;	k__Bacteria	p__Proteobacteria	c__Gammaproteobacteria	o__Enterobacteriales	f__Enterobacteriaceae	f__Enterobacteriaceae	f__Enterobacteriaceae	247	0	8	0	0	0	1	0	1	1	0	0	0	1	0	0	1	0	0	0	0	0	18	0	1	0	0	10	7	0	1	0	5	0	4	3	17	0	3	1	0	4
d022119d4a4c2d27327d0908a76e1948_rep;size=819;	k__Bacteria	p__Actinobacteria	c__Actinobacteria	o__Micrococcales	Ambiguous_taxa	Ambiguous_taxa	Ambiguous_taxa	1	0	6	2	0	0	44	14	1	0	0	5	0	26	0	75	1	12	0	0	0	4	4	0	3	4	11	2	18	0	6	0	5	0	5	60	6	0	0	22	17	5
15341beb044a9d6aaddb530fdbe58960_rep;size=818;	k__Bacteria	p__Proteobacteria	c__Alphaproteobacteria	o__Acetobacterales	f__Acetobacteraceae	g__Roseomonas	Ambiguous_taxa	6	0	2	0	6	0	20	14	3	0	0	0	0	10	0	19	0	7	0	0	0	4	1	0	5	4	9	5	7	0	9	0	6	0	5	41	1	4	0	34	5	19
2bc7c981cfa49bed0c14bd3914b6b395_rep;size=818;	k__Bacteria	p__Cyanobacteria	c__Oxyphotobacteria	o__Nostocales	f__Chroococcidiopsaceae	g__Aliterella CENA595	g__Aliterella CENA595	10	0	0	0	0	0	0	0	7	3	0	0	0	7	0	1	0	0	0	0	0	0	0	0	4	0	2	12	2	1	0	0	8	0	0	3	4	0	1	0	0	1
317178328d9d621939030fd9f3bc5e45_rep;size=817;	k__Bacteria	p__Actinobacteria	c__Actinobacteria	o__Micrococcales	f__Micrococcaceae	g__Kocuria	g__Kocuria	20	0	7	2	0	2	6	7	0	2	2	0	3	3	0	10	9	9	1	0	6	0	0	17	6	5	1	12	9	0	25	0	9	3	6	25	6	9	8	14	8	5
92a624fafdd94d0898f2fafaa4effbf0_rep;size=816;	Unassigned	Unassigned	Unassigned	Unassigned	Unassigned	Unassigned	Unassigned	1	3	0	0	3	0	0	0	0	0	103	0	0	1	0	1	0	0	0	7	4	0	0	0	3	2	0	0	3	1	0	1	0	2	2	9	0	0	2	0	0	1
bd2f12d6b063cf9c0fadf71218732e9e_rep;size=816;	Unassigned	Unassigned	Unassigned	Unassigned	Unassigned	Unassigned	Unassigned	33	2	2	1	0	4	3	7	0	0	0	0	46	1	0	0	51	4	1	0	4	2	2	27	2	6	0	5	37	1	8	1	3	0	3	15	4	0	3	5	12	5
cde2e27e6e1d111ea3a49b133b71caf2_rep;size=816;	k__Bacteria	p__Proteobacteria	c__Alphaproteobacteria	o__Sphingomonadales	f__Sphingomonadaceae	g__Sphingomonas	g__Sphingomonas	27	0	0	3	1	7	0	0	0	0	19	0	0	0	0	2	5	0	3	5	180	0	6	0	8	0	0	8	1	0	1	1	10	1	0	4	8	0	0	7	0	1
c9b5d739858f30aa6667deb028ff2dfa_rep;size=815;	Unassigned	Unassigned	Unassigned	Unassigned	Unassigned	Unassigned	Unassigned	0	0	0	0	0	0	0	0	0	0	0	0	0	0	0	0	0	0	0	0	0	0	0	0	0	0	0	0	0	0	0	0	0	0	0	0	0	0	0	0	0	0
043dd3bfc842454eeab9676dbbdd5955_rep;size=813;	Unassigned	Unassigned	Unassigned	Unassigned	Unassigned	Unassigned	Unassigned	6	8	0	9	0	21	0	0	25	0	9	0	0	0	0	1	16	1	45	0	94	0	2	1	5	0	0	3	15	5	0	0	10	0	0	8	8	1	1	0	2	0
51f9161e28d761f1bfcffe6f87b7d1c1_rep;size=812;	Unassigned	Unassigned	Unassigned	Unassigned	Unassigned	Unassigned	Unassigned	11	0	0	3	2	0	3	1	0	0	5	0	0	2	0	4	0	4	2	0	2	1	7	0	3	6	0	24	3	1	0	1	10	0	6	7	15	0	1	1	6	3
af1c4706b7b284ea73d67106289f85d5_rep;size=811;	Unassigned	Unassigned	Unassigned	Unassigned	Unassigned	Unassigned	Unassigned	3	0	6	0	0	0	1	11	0	0	0	0	0	5	0	1	0	9	0	0	0	12	0	0	4	27	10	17	3	0	3	0	5	0	44	4	30	0	0	2	2	37
339ff3adda075da8e9a01e96c4af7dd4_rep;size=808;	Unassigned	Unassigned	Unassigned	Unassigned	Unassigned	Unassigned	Unassigned	44	3	0	1	0	2	1	0	0	0	0	0	10	2	0	0	27	0	1	1	1	0	0	5	3	0	0	7	37	0	5	5	2	2	0	8	2	0	0	1	0	0
eabd0604dea2d18bd4759bb2d2b25fb9_rep;size=804;	Unassigned	Unassigned	Unassigned	Unassigned	Unassigned	Unassigned	Unassigned	28	1	21	6	0	0	0	9	1	0	0	27	33	4	0	2	5	21	0	0	1	36	2	8	1	2	48	22	5	1	20	5	0	1	7	4	12	2	4	1	4	28
b755f37507f35f5ee9ef6ac4706d8ea8_rep;size=800;	Unassigned	Unassigned	Unassigned	Unassigned	Unassigned	Unassigned	Unassigned	4	0	53	2	0	0	0	50	0	0	0	44	4	2	0	0	3	14	0	0	0	34	0	5	0	0	145	1	2	0	9	0	0	0	2	0	1	3	1	2	24	87
f39c6abe133aa388f56714c61d897c63_rep;size=796;	k__Bacteria	p__Proteobacteria	c__Alphaproteobacteria	o__Sphingomonadales	f__Sphingomonadaceae	g__Sphingomonas	g__Sphingomonas	13	0	0	0	8	3	4	0	0	1	39	0	0	8	3	10	1	9	0	0	1	0	2	1	1	0	6	9	1	2	3	2	5	0	0	2	6	0	0	10	0	0
3647fc4774429230223cd8bca62b7aad_rep;size=795;	k__Bacteria	p__Proteobacteria	c__Gammaproteobacteria	o__Pseudomonadales	f__Pseudomonadaceae	g__Pseudomonas	g__Pseudomonas	0	0	0	3	0	0	0	0	0	0	0	0	0	9	0	14	4	3	0	0	0	0	1	0	0	0	0	0	0	0	0	0	0	0	0	0	0	0	0	1	0	0
c70a1641cd986807af60f554dfb42738_rep;size=794;	k__Bacteria	p__Proteobacteria	c__Gammaproteobacteria	o__Enterobacteriales	f__Enterobacteriaceae	f__Enterobacteriaceae	f__Enterobacteriaceae	18	0	0	4	0	0	0	0	27	0	0	0	0	0	0	0	0	3	0	16	12	0	0	0	3	0	0	8	0	157	0	3	6	0	0	0	0	0	1	0	0	0
9db2817f5c42be6a7bcbca662959982d_rep;size=794;	k__Bacteria	p__Proteobacteria	c__Alphaproteobacteria	o__Rhizobiales	f__Xanthobacteraceae	g__Bradyrhizobium	g__Bradyrhizobium	2	2	0	2	18	6	14	10	1	3	1	7	1	5	2	2	0	0	1	5	5	0	3	0	3	0	3	0	6	4	0	2	7	17	0	68	4	0	2	1	22	0
ee9af7fa12d642b0fea87229b08234bb_rep;size=790;	k__Bacteria	p__Proteobacteria	c__Alphaproteobacteria	o__Rhodobacterales	f__Rhodobacteraceae	g__Paracoccus	Ambiguous_taxa	4	0	1	2	0	0	0	3	1	1	1	0	0	0	0	1	0	3	1	0	3	1	1	0	3	3	0	38	2	0	0	0	5	0	11	5	65	0	0	2	0	9
e6041d5234781e16dabbde86abda75ca_rep;size=790;	k__Bacteria	p__Proteobacteria	c__Gammaproteobacteria	o__Pseudomonadales	f__Moraxellaceae	g__Acinetobacter	s__uncultured bacterium	0	0	0	29	0	0	0	0	0	0	0	0	0	2	41	0	425	0	0	1	0	2	12	0	0	0	0	3	0	0	0	0	2	17	0	0	1	1	0	0	0	0
dddfbbeca7abf9b8a55363d84e04abdc_rep;size=789;	k__Bacteria	p__Actinobacteria	c__Actinobacteria	o__Micrococcales	f__Micrococcaceae	g__Kocuria	Ambiguous_taxa	0	6	72	0	0	0	0	30	0	0	0	73	2	2	1	0	4	8	0	0	0	108	0	7	0	0	269	1	2	5	4	0	0	0	0	6	0	1	0	0	1	38
1079d394b68f065677d245df5fb8d7f4_rep;size=785;	k__Bacteria	p__Proteobacteria	c__Alphaproteobacteria	o__Sphingomonadales	f__Sphingomonadaceae	g__Novosphingobium	Ambiguous_taxa	0	0	0	0	0	1	0	0	0	0	0	0	0	0	3	0	0	0	1	105	0	0	0	0	0	0	0	0	2	0	0	1	0	0	0	0	0	0	0	0	0	0
c70c01cada64f98642bfcfd4ac6f14bf_rep;size=785;	k__Bacteria	p__Actinobacteria	c__Actinobacteria	o__Micrococcales	o__Micrococcales	o__Micrococcales	o__Micrococcales	1	5	8	21	5	2	2	7	1	0	0	28	0	0	0	0	8	4	3	23	0	1	30	0	1	0	2	0	0	1	0	0	1	22	0	0	0	0	5	2	0	7
afcf101401cbbac79bd64623ed4f62c3_rep;size=783;	Unassigned	Unassigned	Unassigned	Unassigned	Unassigned	Unassigned	Unassigned	0	0	0	2	0	14	0	0	4	0	278	0	0	0	0	1	0	0	136	8	8	0	1	0	2	0	0	0	0	0	0	0	1	0	0	1	3	0	0	2	0	0
66f5019f9482a5798d38527367215755_rep;size=781;	k__Bacteria	p__Proteobacteria	c__Alphaproteobacteria	o__Caulobacterales	f__Caulobacteraceae	g__Brevundimonas	g__Brevundimonas	0	55	3	3	0	7	2	2	0	0	0	2	0	1	6	2	70	6	0	0	10	8	1	0	2	1	0	1	8	0	2	1	0	0	7	2	0	0	9	3	0	9
d5f78f8f1caf4a9f5b084961faa6dc37_rep;size=775;	k__Bacteria	p__Bacteroidetes	c__Bacteroidia	o__Cytophagales	f__Hymenobacteraceae	g__Hymenobacter	s__uncultured bacterium	0	0	0	0	0	0	0	0	0	709	0	0	0	0	0	0	0	0	1	0	0	0	0	0	0	0	0	0	0	0	0	0	9	0	0	0	2	0	0	0	0	0
8027b565ae961dd608c1c2012944e15c_rep;size=774;	Unassigned	Unassigned	Unassigned	Unassigned	Unassigned	Unassigned	Unassigned	2	0	0	1	0	5	0	0	5	0	108	0	0	0	1	7	1	0	151	4	42	0	0	0	4	0	0	1	0	0	0	0	12	0	0	2	6	0	1	3	0	0
88b3350b544060c2a9c146393653ca8c_rep;size=773;	Unassigned	Unassigned	Unassigned	Unassigned	Unassigned	Unassigned	Unassigned	26	0	19	5	1	0	7	19	0	0	0	2	0	5	0	4	1	13	0	0	0	26	2	1	5	2	51	16	4	0	13	0	0	0	9	35	12	1	3	15	2	22
c2d4d7e619c8f5ef20a83c81693854c0_rep;size=772;	Unassigned	Unassigned	Unassigned	Unassigned	Unassigned	Unassigned	Unassigned	1	0	0	4	0	188	0	0	0	0	13	0	0	0	4	0	0	0	4	4	6	0	0	0	0	0	0	0	3	0	0	0	0	1	0	1	0	0	1	0	0	0
c60382c379d5747c9cc4033d93242585_rep;size=770;	k__Bacteria	p__Proteobacteria	c__Alphaproteobacteria	o__Acetobacterales	f__Acetobacteraceae	g__uncultured	g__uncultured	1	0	5	2	15	0	32	1	0	1	0	2	0	54	0	6	0	3	1	0	0	0	20	0	10	0	7	12	20	1	0	0	5	0	0	4	3	0	1	12	1	8
e98e97116e19340c55a73157bd297484_rep;size=768;	k__Bacteria	p__Actinobacteria	c__Actinobacteria	o__Micrococcales	f__Micrococcaceae	f__Micrococcaceae	f__Micrococcaceae	38	1	7	2	0	1	1	3	1	3	10	3	7	0	0	7	7	7	4	0	20	4	0	4	15	0	10	10	12	0	11	9	9	0	4	9	21	1	2	4	12	6
7a02fb4e90d4a98664ae5408fe0204e9_rep;size=766;	k__Bacteria	p__Actinobacteria	c__Actinobacteria	o__Micrococcales	f__Dermabacteraceae	g__Brachybacterium	s__Brachybacterium sp. FV3	22	0	0	0	6	0	0	5	0	0	0	3	0	0	0	0	0	20	0	0	3	0	1	0	4	3	1	0	21	0	3	0	25	0	1	0	1	3	2	0	8	2
b47b09305a13e6bc88b13956fa7e29f8_rep;size=761;	k__Bacteria	p__Proteobacteria	c__Alphaproteobacteria	o__Sphingomonadales	f__Sphingomonadaceae	g__Sphingomonas	g__Sphingomonas	22	0	1	0	1	1	0	2	1	0	4	0	0	1	1	23	0	1	1	3	1	0	4	1	2	1	4	26	1	0	3	0	4	0	2	10	19	0	0	57	0	1
9d092949fe0ddd741abb464ee04fac50_rep;size=757;	k__Bacteria	p__Proteobacteria	c__Alphaproteobacteria	o__Rhodobacterales	f__Rhodobacteraceae	g__uncultured	s__uncultured bacterium	0	0	0	0	0	0	0	6	0	0	1	0	0	2	0	1	0	0	1	0	0	2	0	0	7	3	0	25	1	0	0	0	1	1	15	1	62	2	0	1	0	5
34f4437049b379c6c162c4e83b123220_rep;size=755;	Unassigned	Unassigned	Unassigned	Unassigned	Unassigned	Unassigned	Unassigned	0	409	0	1	0	0	0	0	0	0	0	0	0	0	0	0	0	0	0	3	0	0	0	0	2	0	0	0	55	0	0	5	3	0	0	0	0	0	0	0	0	0
a5bbfecc0e63c03fd852157068339c59_rep;size=754;	k__Bacteria	p__Firmicutes	c__Bacilli	o__Lactobacillales	f__Carnobacteriaceae	f__Carnobacteriaceae	f__Carnobacteriaceae	0	0	35	0	0	0	375	11	0	0	0	25	0	0	0	0	0	1	0	0	0	2	1	1	0	0	116	1	0	0	6	0	0	0	0	0	0	0	0	0	18	6
9eacc08b7ee76387dd997bf641d88ac9_rep;size=749;	k__Bacteria	p__Proteobacteria	c__Alphaproteobacteria	o__Rhizobiales	f__Xanthobacteraceae	g__Xanthobacter	Ambiguous_taxa	0	208	0	0	0	0	0	0	0	0	0	4	0	0	0	0	0	1	0	0	0	3	0	0	2	0	0	0	174	0	1	0	2	0	0	0	0	0	0	0	0	0
c8bee002ae8e648adaedcc13bcb2e049_rep;size=748;	k__Bacteria	p__Proteobacteria	c__Alphaproteobacteria	o__Sphingomonadales	f__Sphingomonadaceae	g__Sphingomonas	Ambiguous_taxa	0	0	0	1	0	28	0	0	0	2	0	0	0	0	554	0	2	0	9	0	3	0	0	0	0	0	0	1	0	0	0	0	0	0	0	1	1	0	0	0	0	0
387a28d93203b800d647decb04e164db_rep;size=748;	k__Bacteria	p__Acidobacteria	c__Acidobacteriia	o__Solibacterales	f__Solibacteraceae (Subgroup 3)	g__Bryobacter	Ambiguous_taxa	0	0	0	0	5	0	0	3	0	1	0	0	0	2	0	0	0	0	0	0	0	0	0	0	3	0	0	1	0	2	0	0	4	0	0	4	1	0	0	0	0	0
ea0d5b58856f54946a0102f0d3cbdb20_rep;size=747;	k__Bacteria	p__Actinobacteria	c__Actinobacteria	o__Micrococcales	f__Micrococcaceae	f__Micrococcaceae	f__Micrococcaceae	4	0	4	6	0	1	15	9	0	0	1	13	54	18	2	13	2	15	0	0	0	1	3	10	2	3	20	3	1	5	9	0	8	0	6	1	3	0	1	10	10	3
ffbad8938e812e2d01ce161d36abe7af_rep;size=743;	k__Bacteria	p__Firmicutes	c__Bacilli	o__Lactobacillales	f__Carnobacteriaceae	g__Trichococcus	g__Trichococcus	2	0	0	1	1	0	0	0	0	0	0	1	0	6	0	0	0	2	0	7	0	1	0	0	2	0	0	27	0	3	12	350	6	1	0	0	2	0	1	1	0	0
7a61de0dee133b4f77938859bc9bc23e_rep;size=741;	k__Bacteria	p__Proteobacteria	c__Alphaproteobacteria	o__Sphingomonadales	f__Sphingomonadaceae	g__Sphingomonas	g__Sphingomonas	36	0	0	2	1	77	0	2	6	3	5	0	0	1	0	0	2	7	0	7	5	0	36	0	2	3	0	14	0	2	1	0	0	24	5	7	3	12	0	18	1	6
26efe9aa67bda7bbd4cbd66eee10c71d_rep;size=741;	k__Bacteria	p__Firmicutes	c__Bacilli	o__Bacillales	f__Bacillaceae	g__Bacillus	Ambiguous_taxa	0	0	0	1	1	0	0	1	2	0	0	4	0	0	0	0	0	1	0	0	0	1	1	0	0	0	0	0	5	0	3	0	0	7	0	2	0	2	0	0	3	2
1dd286f02278c8c1936783eb9a299282_rep;size=741;	k__Bacteria	p__Actinobacteria	c__Actinobacteria	o__Frankiales	f__Geodermatophilaceae	g__Blastococcus	g__Blastococcus	2	1	0	2	45	0	23	1	0	1	7	8	0	12	0	0	0	14	0	0	0	0	5	0	5	5	2	0	1	8	0	0	4	182	0	5	0	1	76	0	4	5
dbcf434e54d2ba603f79e8b401d3b980_rep;size=740;	Unassigned	Unassigned	Unassigned	Unassigned	Unassigned	Unassigned	Unassigned	9	3	0	2	0	38	0	1	0	0	2	0	0	0	96	2	10	0	15	1	14	0	1	1	6	0	0	8	11	0	1	1	2	2	1	4	6	0	0	0	1	0
70b7d2259f769bd6d49c6f3c26a7d053_rep;size=738;	k__Bacteria	p__Proteobacteria	c__Alphaproteobacteria	o__Acetobacterales	f__Acetobacteraceae	g__Roseomonas	g__Roseomonas	1	0	2	0	4	0	1	7	1	0	1	1	0	10	0	42	0	6	0	0	0	0	5	0	6	1	3	62	13	0	1	0	4	0	0	0	2	12	0	33	0	2
1a10c1e18723dc8ea2b56376424fc481_rep;size=738;	Unassigned	Unassigned	Unassigned	Unassigned	Unassigned	Unassigned	Unassigned	13	0	0	0	0	0	10	5	0	0	0	0	0	3	0	3	0	4	0	0	0	3	3	0	0	6	4	30	2	0	2	0	3	0	14	13	32	0	0	8	5	9
0b219adb3f00a21b34beb8568f560ccc_rep;size=736;	k__Bacteria	p__Actinobacteria	c__Actinobacteria	o__Micrococcales	f__Micrococcaceae	g__Kocuria	g__Kocuria	0	0	0	0	3	0	49	5	0	0	0	1	0	30	0	40	0	2	0	0	0	0	0	0	1	18	0	8	2	1	0	0	11	0	2	12	3	0	1	7	7	4
14ad59b711116d2764bdeacc58309972_rep;size=736;	k__Bacteria	p__Proteobacteria	c__Alphaproteobacteria	o__Sphingomonadales	f__Sphingomonadaceae	g__Sphingomonas	g__Sphingomonas	3	0	0	69	0	61	0	0	0	0	16	0	5	0	0	1	0	0	0	0	0	0	18	11	0	0	0	0	0	0	2	1	9	0	0	0	0	0	0	2	2	1
47076440031c8d3e20b8bc9b29c95e69_rep;size=734;	k__Bacteria	p__Proteobacteria	c__Alphaproteobacteria	o__Rhizobiales	f__Beijerinckiaceae	g__Methylobacterium	g__Methylobacterium	4	0	0	3	1	3	0	0	5	262	3	0	0	0	20	3	0	0	13	0	4	0	0	0	1	0	0	4	4	0	0	0	1	1	0	0	0	0	0	1	0	0
40e4d1abf8646b4c61abd3d78a781c41_rep;size=733;	Unassigned	Unassigned	Unassigned	Unassigned	Unassigned	Unassigned	Unassigned	3	0	2	0	1	0	1	4	0	0	0	0	0	0	0	2	0	1	0	0	1	1	0	0	3	0	3	38	6	0	0	0	3	0	10	53	45	1	0	5	1	2
1143d9575a01fbfa668560101826ec62_rep;size=733;	k__Bacteria	p__Proteobacteria	c__Alphaproteobacteria	o__Caulobacterales	f__Caulobacteraceae	g__Brevundimonas	g__Brevundimonas	14	9	0	5	0	31	0	0	4	0	5	0	3	0	23	0	17	0	8	5	15	0	1	5	0	0	0	4	13	1	3	1	8	1	0	7	4	0	0	0	0	0
3c60bb7ea471ea841af072f0ae090fe0_rep;size=731;	k__Bacteria	p__Proteobacteria	c__Alphaproteobacteria	o__Rhizobiales	f__Beijerinckiaceae	g__Methylobacterium	Ambiguous_taxa	2	0	0	1	0	100	1	0	2	3	24	0	0	0	21	0	1	0	29	1	4	0	3	0	0	0	0	0	6	2	0	0	1	2	0	2	0	1	0	1	0	0
e9b08416097f0031e8d80ea6857a926b_rep;size=730;	k__Bacteria	p__Proteobacteria	c__Alphaproteobacteria	o__Rhizobiales	f__Beijerinckiaceae	g__Methylobacterium	Ambiguous_taxa	0	0	0	0	0	0	0	0	0	28	1	0	0	0	2	0	0	0	0	0	0	0	0	0	0	0	0	0	0	0	0	0	0	1	0	0	0	0	0	0	0	0
78e18170e0677b84122376221dafff62_rep;size=729;	k__Bacteria	p__Proteobacteria	c__Alphaproteobacteria	o__Rhodobacterales	f__Rhodobacteraceae	g__Paracoccus	g__Paracoccus	55	0	0	7	0	2	0	8	0	0	0	0	0	18	0	32	0	6	0	0	1	9	1	0	3	2	3	1	7	0	29	0	1	0	11	6	2	0	1	43	1	27
103e12d4a1aa870bed54ae1c60849796_rep;size=725;	k__Bacteria	p__Proteobacteria	c__Alphaproteobacteria	o__Acetobacterales	f__Acetobacteraceae	f__Acetobacteraceae	f__Acetobacteraceae	0	0	0	0	1	0	0	0	0	1	0	2	0	0	0	0	0	0	0	0	0	0	0	0	0	0	0	3	0	0	0	0	0	0	0	0	0	13	0	0	0	0
f164e92fa767c803617eb6e28520534f_rep;size=723;	k__Bacteria	p__Proteobacteria	c__Alphaproteobacteria	o__Sphingomonadales	f__Sphingomonadaceae	g__Sphingobium	Ambiguous_taxa	0	22	0	17	0	0	0	0	0	0	1	0	0	0	0	4	60	0	0	4	6	4	2	30	2	1	0	0	128	0	0	0	3	0	1	2	0	0	16	0	0	0
7a93b9fda28313638d861158568f6082_rep;size=721;	Unassigned	Unassigned	Unassigned	Unassigned	Unassigned	Unassigned	Unassigned	3	0	64	0	0	0	0	46	0	0	0	28	6	3	0	0	3	8	0	0	0	32	1	9	0	3	132	3	1	0	13	0	3	0	1	1	0	4	2	0	12	79
17997d45af07dfabcb9c186834068b40_rep;size=721;	k__Bacteria	p__Proteobacteria	c__Gammaproteobacteria	o__Betaproteobacteriales	f__Burkholderiaceae	f__Burkholderiaceae	f__Burkholderiaceae	0	0	1	82	0	66	9	0	2	0	0	1	0	8	0	4	9	0	0	5	0	0	0	0	3	0	0	3	1	7	0	0	0	0	0	0	0	0	13	0	0	0
879bd9c28c1be64ea83e45e75ca2e19f_rep;size=720;	k__Bacteria	p__Proteobacteria	c__Alphaproteobacteria	o__Sphingomonadales	f__Sphingomonadaceae	g__Sphingomonas	g__Sphingomonas	4	1	0	4	0	71	0	0	4	8	24	0	0	0	7	1	2	0	28	3	60	0	5	0	1	0	0	1	8	0	0	0	4	0	0	6	5	0	0	0	0	0
29cc5cfa404dcd7e3234b5c0daa8665a_rep;size=719;	Unassigned	Unassigned	Unassigned	Unassigned	Unassigned	Unassigned	Unassigned	1	0	10	0	5	0	0	3	0	0	0	0	0	9	0	0	2	0	0	0	0	0	24	8	1	0	0	85	2	2	3	0	0	0	1	0	0	0	0	0	0	0
e8bd34b4c31357a8ff86884030aaa618_rep;size=718;	Unassigned	Unassigned	Unassigned	Unassigned	Unassigned	Unassigned	Unassigned	0	0	0	0	0	408	0	0	0	2	0	0	0	0	0	0	0	0	0	3	0	0	0	0	0	0	0	0	0	2	0	0	0	5	0	0	0	0	0	0	0	0
ae027ebe872a6900512ff4247c619a38_rep;size=718;	Unassigned	Unassigned	Unassigned	Unassigned	Unassigned	Unassigned	Unassigned	0	0	72	0	0	0	0	41	0	0	0	9	0	0	0	0	0	0	0	0	0	145	0	0	1	0	299	0	0	0	1	0	0	0	0	1	0	0	0	2	0	77
cca53afb06b15b2a2ca3541e49a129bc_rep;size=714;	k__Bacteria	p__Actinobacteria	c__Actinobacteria	o__Micrococcales	f__Micrococcaceae	f__Micrococcaceae	f__Micrococcaceae	1	0	0	0	42	0	3	5	0	3	0	7	0	12	0	29	0	14	0	0	1	1	3	0	2	1	6	5	0	9	0	0	7	3	0	67	5	2	4	32	0	3
4adc7052fd412ae99a74f7ae6232f273_rep;size=711;	Unassigned	Unassigned	Unassigned	Unassigned	Unassigned	Unassigned	Unassigned	1	0	0	0	31	0	0	0	1	0	0	0	0	2	0	1	0	1	1	0	1	0	0	0	24	1	0	58	0	0	0	0	18	0	0	0	42	0	4	3	0	0
d673a066f893ba0a2600fa8f4eb7e715_rep;size=708;	k__Bacteria	p__Actinobacteria	c__Actinobacteria	o__Micrococcales	f__Microbacteriaceae	g__Gulosibacter	g__Gulosibacter	15	4	6	10	1	0	3	4	0	0	0	1	0	3	0	0	1	6	0	0	0	16	4	1	6	12	4	23	5	0	0	0	3	0	7	2	10	1	3	4	6	10
59a637bc7425dc0bd44427c66f02153b_rep;size=707;	k__Bacteria	p__Firmicutes	c__Clostridia	o__Clostridiales	f__Clostridiaceae 1	g__Clostridium sensu stricto 10	g__Clostridium sensu stricto 10	0	0	0	0	0	0	0	0	0	0	0	0	0	0	0	0	0	0	0	541	0	0	0	0	0	0	0	0	0	18	0	2	0	49	0	0	0	0	0	0	0	0
c3f4be103511eb5de5960b3e83f1250a_rep;size=707;	k__Bacteria	p__Proteobacteria	c__Gammaproteobacteria	o__Betaproteobacteriales	f__Burkholderiaceae	g__Massilia	s__uncultured bacterium	2	0	2	1	11	6	20	0	0	0	0	2	0	0	0	7	0	1	1	0	0	0	0	0	5	0	0	1	8	0	0	8	9	0	0	3	5	2	0	3	0	3
ebf28dfb01d68f855e4ebd222cca570d_rep;size=706;	k__Bacteria	p__Proteobacteria	c__Gammaproteobacteria	o__Enterobacteriales	f__Enterobacteriaceae	f__Enterobacteriaceae	f__Enterobacteriaceae	44	0	3	2	0	0	0	1	0	0	0	0	0	1	0	1	0	1	0	0	0	0	0	0	2	0	0	3	4	0	0	0	0	2	0	0	0	0	0	0	0	0
705ef917f437e2283626793c190d26d3_rep;size=704;	k__Bacteria	p__Bacteroidetes	c__Bacteroidia	o__Cytophagales	f__Hymenobacteraceae	g__Hymenobacter	g__Hymenobacter	0	0	0	1	0	4	1	1	12	0	0	0	0	0	4	0	0	0	2	41	11	2	1	3	0	0	2	0	0	5	0	0	2	99	0	0	0	0	1	1	0	0
a383b7037d5b70d58895cd6cce0a3f0c_rep;size=702;	k__Bacteria	p__Proteobacteria	c__Gammaproteobacteria	o__Xanthomonadales	f__Xanthomonadaceae	g__Luteimonas	Ambiguous_taxa	3	0	1	0	0	0	0	4	0	1	0	4	0	0	0	0	0	10	0	0	0	0	2	0	0	32	1	19	1	4	1	0	1	1	61	1	10	2	0	1	0	8
c19666e83971163a7fa25b1d6892cc48_rep;size=701;	k__Bacteria	p__Proteobacteria	c__Alphaproteobacteria	o__Sphingomonadales	f__Sphingomonadaceae	g__Altererythrobacter	Ambiguous_taxa	2	0	0	0	0	0	1	3	0	0	1	0	0	0	0	7	0	1	0	0	0	0	1	0	1	0	1	23	1	0	2	0	2	1	3	75	29	0	0	3	2	2
a5320278235f408fe61cc681f860c017_rep;size=695;	Unassigned	Unassigned	Unassigned	Unassigned	Unassigned	Unassigned	Unassigned	1	1	0	15	0	20	1	0	8	0	33	0	0	0	18	0	5	0	14	4	27	0	0	0	5	0	0	0	4	0	0	0	1	0	0	1	0	0	0	0	0	0
f1fd2dc2b29eff4e6a03ba648128d0f3_rep;size=695;	k__Bacteria	p__Deinococcus-Thermus	c__Deinococci	o__Deinococcales	f__Deinococcaceae	g__Deinococcus	s__uncultured bacterium	6	0	0	0	11	0	2	0	1	3	0	0	0	1	0	1	0	3	0	0	1	0	0	0	12	0	0	12	0	7	0	0	31	0	0	0	8	0	2	4	0	1
9e63ce328dfeff2cc8544feaf2d48f7e_rep;size=694;	k__Bacteria	p__Proteobacteria	c__Alphaproteobacteria	o__Sphingomonadales	f__Sphingomonadaceae	g__Sphingomonas	Ambiguous_taxa	0	2	0	0	7	0	0	1	0	0	1	1	0	0	0	0	0	0	0	1	2	2	0	0	0	1	5	20	0	1	1	0	2	0	1	7	9	3	0	0	31	0
d1316b26e5350da36e6456499ecdfe18_rep;size=694;	k__Bacteria	p__Actinobacteria	c__Actinobacteria	o__Micrococcales	f__Micrococcaceae	f__Micrococcaceae	f__Micrococcaceae	2	1	0	10	39	1	71	1	1	0	0	2	0	3	0	0	0	23	0	0	0	0	7	3	3	2	0	4	9	46	2	0	14	17	2	7	2	25	6	3	1	2
349297d911429de9f29df566ac3bb90a_rep;size=691;	Unassigned	Unassigned	Unassigned	Unassigned	Unassigned	Unassigned	Unassigned	3	0	4	0	0	0	1	1	4	3	0	0	0	10	0	3	0	0	0	0	1	0	1	0	16	0	3	7	3	2	0	0	37	0	0	8	11	0	0	2	0	0
8825e8d51f0bfc1d9b02dd502fd0ef69_rep;size=690;	k__Bacteria	p__Proteobacteria	c__Alphaproteobacteria	o__Rhizobiales	f__Beijerinckiaceae	g__Methylobacterium	Ambiguous_taxa	0	0	0	0	0	2	0	0	0	219	2	0	0	0	1	0	0	0	6	0	2	0	0	0	0	0	0	0	0	0	0	0	0	0	0	0	0	0	0	0	0	0
a7773d30c5a2009a19ba2df73fe658c1_rep;size=690;	k__Bacteria	p__Proteobacteria	c__Gammaproteobacteria	o__Enterobacteriales	f__Enterobacteriaceae	f__Enterobacteriaceae	f__Enterobacteriaceae	0	0	0	0	0	0	0	0	4	0	0	0	0	0	0	0	0	1	0	0	0	0	0	0	0	0	0	0	0	0	0	0	0	0	0	0	0	0	0	0	0	0
d91ffbe2b75e102d98b7b0346742a631_rep;size=689;	k__Bacteria	p__Proteobacteria	c__Gammaproteobacteria	o__Betaproteobacteriales	f__Burkholderiaceae	g__Aquabacterium	s__uncultured bacterium	0	0	0	0	0	0	0	0	0	0	0	0	0	0	0	0	0	1	0	0	0	0	0	0	0	0	0	0	0	0	0	0	0	0	0	0	0	0	0	0	0	0
f5897a4922cb54ec8575b699f2853ced_rep;size=686;	k__Bacteria	p__Proteobacteria	c__Alphaproteobacteria	o__Sphingomonadales	f__Sphingomonadaceae	g__Altererythrobacter	Ambiguous_taxa	1	0	0	0	1	0	0	0	0	0	3	0	0	1	0	2	0	0	1	0	30	0	2	0	4	0	0	14	1	0	0	0	5	0	2	15	24	0	0	0	0	0
3bcf2d1cdd89d034cfd27ab2c1035b74_rep;size=686;	k__Bacteria	p__Proteobacteria	c__Alphaproteobacteria	o__Rhizobiales	f__Beijerinckiaceae	g__Methylobacterium	s__uncultured bacterium	2	0	0	3	1	1	0	0	7	227	10	0	0	0	2	3	0	0	37	0	7	0	2	0	0	0	0	3	6	0	0	0	5	1	0	0	2	0	0	0	0	0
627c331fddaa956e0caf61787b734027_rep;size=685;	k__Bacteria	p__Proteobacteria	c__Alphaproteobacteria	o__Caulobacterales	f__Caulobacteraceae	g__Brevundimonas	g__Brevundimonas	4	3	0	2	0	6	0	0	0	0	0	0	1	1	2	0	87	0	0	0	16	2	3	1	0	0	1	0	38	0	0	0	4	0	0	4	4	0	4	3	0	0
24b9c101ddcac0d8f5c60eb4a4121986_rep;size=684;	k__Bacteria	p__Proteobacteria	c__Alphaproteobacteria	o__Rhizobiales	f__Rhizobiaceae	f__Rhizobiaceae	f__Rhizobiaceae	0	0	1	1	3	3	98	1	0	0	0	4	1	14	0	0	0	3	0	0	0	8	1	0	0	0	3	3	15	5	55	5	0	0	0	114	0	0	0	0	3	0
44834662f2b18cb6a1ec31ea5bb8a1aa_rep;size=682;	k__Bacteria	p__Proteobacteria	c__Alphaproteobacteria	o__Rhizobiales	f__Rhizobiaceae	g__Allorhizobium-Neorhizobium-Pararhizobium-Rhizobium	g__Allorhizobium-Neorhizobium-Pararhizobium-Rhizobium	0	0	0	0	2	0	0	2	0	0	0	0	0	2	0	1	140	0	0	0	0	3	1	0	2	0	0	0	8	0	4	0	7	18	0	0	3	0	43	1	2	1
4277119e0db7e030b830072483d554ad_rep;size=681;	Unassigned	Unassigned	Unassigned	Unassigned	Unassigned	Unassigned	Unassigned	16	0	1	0	0	1	1	6	2	3	6	0	0	8	0	26	3	3	0	0	12	0	10	4	5	3	2	9	5	1	6	1	7	0	4	10	9	4	0	24	2	3
659fd0d4ba3933fdd05705e768e5a7b6_rep;size=678;	k__Bacteria	p__Firmicutes	c__Bacilli	o__Bacillales	f__Staphylococcaceae	g__Staphylococcus	g__Staphylococcus	0	0	0	91	1	0	0	0	0	0	0	0	0	0	0	0	0	3	0	5	0	1	0	0	1	1	0	1	0	0	0	0	1	0	2	2	0	0	0	0	0	0
231996443242aac2dd0a4cd044df7f94_rep;size=677;	Unassigned	Unassigned	Unassigned	Unassigned	Unassigned	Unassigned	Unassigned	3	0	0	2	1	16	0	0	4	60	131	0	0	0	5	0	0	0	118	2	3	0	2	0	1	0	0	0	0	0	0	0	0	2	0	1	0	0	0	1	0	0
6ce35ed9c44a62a27bdcdd6f9debd13a_rep;size=676;	k__Bacteria	p__Proteobacteria	c__Alphaproteobacteria	o__Rhizobiales	f__Rhizobiaceae	g__Allorhizobium-Neorhizobium-Pararhizobium-Rhizobium	g__Allorhizobium-Neorhizobium-Pararhizobium-Rhizobium	2	9	1	15	0	8	6	1	0	0	6	1	0	2	27	5	2	0	0	64	0	0	7	17	8	1	1	1	12	3	1	4	4	2	2	0	0	4	5	1	0	0
f1275303d356fc2a9890e6a1ccc883ff_rep;size=675;	k__Bacteria	p__Actinobacteria	c__Actinobacteria	o__Micrococcales	f__Micrococcaceae	f__Micrococcaceae	f__Micrococcaceae	9	0	0	0	29	0	2	13	1	0	0	3	0	24	0	37	0	14	0	0	17	0	1	0	4	1	5	4	4	0	1	0	6	0	0	8	11	0	2	26	0	8
b2721aee3704464a908c952f350b7426_rep;size=674;	Unassigned	Unassigned	Unassigned	Unassigned	Unassigned	Unassigned	Unassigned	6	0	0	0	0	1	1	0	0	0	0	4	0	4	0	0	0	4	0	0	0	0	2	2	5	0	0	3	1	192	0	106	3	20	0	0	0	0	139	0	1	0
ffff16162e232d7d73d892ea241d7236_rep;size=674;	k__Bacteria	p__Proteobacteria	c__Alphaproteobacteria	o__Sphingomonadales	f__Sphingomonadaceae	g__Sphingomonas	g__Sphingomonas	5	0	0	0	0	12	0	0	2	1	136	0	0	0	2	4	0	0	16	0	89	0	0	0	0	0	0	4	0	0	0	0	6	0	0	3	5	0	1	3	0	0
e1abd4fbf17f24886841d352f2b8046e_rep;size=670;	k__Bacteria	p__Bacteroidetes	c__Bacteroidia	o__Cytophagales	f__Spirosomaceae	g__Flectobacillus	Ambiguous_taxa	0	0	0	0	0	0	0	0	0	0	0	0	0	0	0	0	0	0	0	0	0	0	0	38	0	0	0	0	0	0	0	1	0	2	0	0	0	0	0	0	0	0
9fb7542ced2f58dc5cd91cb7d57ef5d0_rep;size=670;	k__Bacteria	p__Proteobacteria	c__Alphaproteobacteria	o__Sphingomonadales	f__Sphingomonadaceae	g__Sphingomonas	Ambiguous_taxa	1	0	0	24	0	66	0	0	0	0	1	0	44	0	0	0	7	0	0	1	1	0	11	40	1	0	0	0	4	0	7	3	5	0	0	0	0	0	0	0	6	0
ac11382041328811e20aa98947eff663_rep;size=669;	k__Bacteria	p__Actinobacteria	c__Actinobacteria	o__Micrococcales	f__Micrococcaceae	g__Kocuria	Ambiguous_taxa	0	3	62	1	0	0	0	20	0	0	0	74	0	0	0	0	0	7	0	0	0	91	0	4	0	0	237	1	1	0	7	0	0	1	0	8	0	1	0	1	2	20
e132dd4917591868c0a64795d9faa994_rep;size=669;	Unassigned	Unassigned	Unassigned	Unassigned	Unassigned	Unassigned	Unassigned	0	0	0	2	0	46	0	0	1	57	124	0	0	0	65	1	0	0	29	2	3	0	0	0	0	0	0	0	0	0	0	0	0	1	0	0	0	0	0	5	0	0
3ca2c78e9c26a57c945efe7a93a5eaef_rep;size=667;	k__Bacteria	p__Actinobacteria	c__Actinobacteria	o__Micrococcales	f__Micrococcaceae	g__Kocuria	g__Kocuria	4	0	3	2	2	0	14	10	0	0	0	6	0	28	0	81	1	5	0	0	1	0	1	0	7	0	7	4	7	0	6	0	7	0	0	16	5	1	0	30	5	12
f655fe707ece2afdeed89090aecc938e_rep;size=665;	k__Bacteria	p__Firmicutes	c__Bacilli	o__Bacillales	f__Planococcaceae	f__Planococcaceae	f__Planococcaceae	0	3	3	0	1	0	10	1	0	1	0	0	0	0	0	0	0	6	0	0	0	32	0	0	5	2	1	1	0	2	0	2	0	1	0	5	2	1	1	0	1	6
c676fc43ce26efabbf7d94c282a564cb_rep;size=663;	k__Bacteria	p__Proteobacteria	c__Gammaproteobacteria	o__Xanthomonadales	f__Xanthomonadaceae	g__Luteimonas	Ambiguous_taxa	8	0	1	0	2	0	1	1	0	1	2	1	0	0	0	0	0	5	0	0	1	1	0	0	0	5	1	37	0	16	2	1	2	1	9	3	27	0	0	0	0	1
438363df8c425d58724796ec621ec1b3_rep;size=659;	Unassigned	Unassigned	Unassigned	Unassigned	Unassigned	Unassigned	Unassigned	7	9	0	6	0	16	0	0	19	1	6	0	0	0	0	0	14	0	32	0	81	0	0	0	1	1	0	6	7	2	2	1	8	1	0	10	7	0	1	1	3	2
52ac174654e374ff2670be6855b1c8e1_rep;size=658;	k__Bacteria	p__Proteobacteria	c__Alphaproteobacteria	o__Sphingomonadales	f__Sphingomonadaceae	g__Novosphingobium	Ambiguous_taxa	3	0	0	4	0	2	0	0	1	0	1	0	0	0	0	2	1	0	0	3	484	0	1	0	5	1	0	2	0	0	0	0	1	0	0	1	2	0	0	0	0	0
4429e7301fa5316282d0028815af5317_rep;size=656;	Unassigned	Unassigned	Unassigned	Unassigned	Unassigned	Unassigned	Unassigned	3	0	0	4	1	0	0	1	23	0	0	0	0	0	0	1	0	0	366	0	0	0	0	0	0	0	0	2	0	0	0	0	2	0	0	12	3	0	0	2	0	0
82d39a5262f79c735f02890ade0759a6_rep;size=655;	k__Bacteria	p__Proteobacteria	c__Gammaproteobacteria	o__Enterobacteriales	f__Enterobacteriaceae	g__Serratia	g__Serratia	1	0	144	0	0	0	1	1	5	1	0	16	0	10	0	1	0	1	0	1	0	0	0	2	9	0	0	7	5	8	0	0	7	0	0	4	0	0	1	1	0	0
ce35ab9691c1ec5db18a78bf12aa0bc5_rep;size=652;	k__Bacteria	p__Proteobacteria	c__Gammaproteobacteria	o__Betaproteobacteriales	f__Burkholderiaceae	f__Burkholderiaceae	f__Burkholderiaceae	0	0	0	0	0	0	0	0	0	0	0	0	0	0	0	0	0	0	0	0	0	0	0	0	1	0	0	0	0	0	0	1	0	0	0	1	0	0	0	0	0	0
4c2ae9bc7038773147236e078ebc58a4_rep;size=651;	k__Bacteria	p__Proteobacteria	c__Alphaproteobacteria	o__Rhizobiales	f__Rhizobiaceae	g__Allorhizobium-Neorhizobium-Pararhizobium-Rhizobium	g__Allorhizobium-Neorhizobium-Pararhizobium-Rhizobium	0	19	0	3	0	6	0	0	1	0	28	0	0	0	1	4	0	1	0	33	4	0	0	2	0	1	0	0	3	1	1	0	0	1	5	0	0	0	0	1	0	0
62f9c74589c6029a1e7856ab6589501c_rep;size=649;	k__Bacteria	p__Bacteroidetes	c__Bacteroidia	o__Cytophagales	f__Spirosomaceae	g__Spirosoma	s__uncultured bacterium	0	0	0	1	0	99	0	0	2	0	0	0	0	0	0	0	0	1	2	0	1	0	0	0	0	0	0	0	0	0	0	0	3	4	0	0	0	2	0	0	0	0
435ad0112f0a8280c6c8de69b917d173_rep;size=649;	k__Bacteria	p__Proteobacteria	c__Alphaproteobacteria	o__Sphingomonadales	f__Sphingomonadaceae	g__Sphingomonas	Ambiguous_taxa	1	0	0	0	0	14	0	0	0	112	11	0	0	0	139	0	0	0	10	1	0	0	1	0	0	0	0	0	0	0	0	0	1	0	0	0	0	0	0	2	0	0
54c7e5fa678213ba5c6223bdf5abee69_rep;size=647;	k__Bacteria	p__Proteobacteria	c__Alphaproteobacteria	o__Rhizobiales	f__Devosiaceae	g__Devosia	g__Devosia	2	8	2	5	1	3	3	2	9	0	0	3	0	0	0	1	0	1	0	0	1	9	0	1	2	1	15	2	0	0	12	3	3	20	0	2	1	0	60	2	0	3
eaefbe819c87638ec32ab56ef4ee84c4_rep;size=647;	k__Bacteria	p__Proteobacteria	c__Alphaproteobacteria	o__Sphingomonadales	f__Sphingomonadaceae	g__Sphingomonas	Ambiguous_taxa	4	1	0	2	0	4	0	1	2	0	19	0	0	0	2	0	0	0	41	0	46	0	1	0	7	0	0	15	3	1	1	0	10	1	0	5	15	0	0	1	0	0
a7404230862dd66f2e19b53c2939ed02_rep;size=645;	k__Bacteria	p__Actinobacteria	c__Actinobacteria	o__Propionibacteriales	f__Nocardioidaceae	g__Nocardioides	g__Nocardioides	2	0	0	1	14	1	36	1	1	0	1	2	0	3	0	0	4	8	0	0	0	0	0	1	0	18	1	4	67	40	1	0	2	24	25	1	2	2	7	3	6	4
9396f830b2089193e2be6dcb57aa9f8d_rep;size=645;	k__Bacteria	p__Proteobacteria	c__Alphaproteobacteria	o__Sphingomonadales	f__Sphingomonadaceae	g__Sphingomonas	Ambiguous_taxa	13	0	0	51	0	44	0	0	1	0	24	0	1	0	1	0	3	0	2	0	1	0	12	7	1	0	0	0	2	1	12	0	41	0	0	0	4	0	0	0	8	0
e5d2897df2f464827244b871d67ee050_rep;size=643;	k__Bacteria	p__Proteobacteria	c__Alphaproteobacteria	o__Rhizobiales	f__Devosiaceae	g__Devosia	g__Devosia	0	7	0	0	1	1	0	0	0	0	2	0	0	1	2	0	0	2	0	28	0	0	0	1	4	0	0	0	67	0	1	32	2	2	0	7	0	0	2	5	2	1
59401dc50e53305cffb07e89c160ab35_rep;size=641;	k__Bacteria	p__Proteobacteria	c__Alphaproteobacteria	o__Rhizobiales	f__Xanthobacteraceae	f__Xanthobacteraceae	f__Xanthobacteraceae	0	30	0	192	0	0	0	0	0	0	0	0	0	0	0	0	0	0	0	17	0	5	0	0	0	0	0	0	0	4	0	0	0	1	0	0	0	0	2	0	0	0
1e99bd956b46846e0bff2b88827a35ed_rep;size=641;	k__Bacteria	p__Actinobacteria	c__Actinobacteria	o__Micrococcales	f__Beutenbergiaceae	g__metagenome	s__metagenome	0	0	6	5	0	1	3	20	0	0	0	47	3	12	0	4	2	22	0	0	0	15	8	4	0	5	29	0	21	0	10	0	0	3	9	15	0	6	0	4	13	15
702987c0157b101a597c16688bb994dc_rep;size=639;	k__Bacteria	p__Proteobacteria	c__Gammaproteobacteria	o__Xanthomonadales	f__Xanthomonadaceae	g__Stenotrophomonas	g__Stenotrophomonas	0	51	1	5	0	9	0	0	0	0	0	0	0	0	0	2	0	0	3	2	0	0	3	1	10	0	0	8	6	0	1	18	3	97	0	3	1	0	5	1	0	0
f90f7c0a567c9957652e8aca4a318104_rep;size=638;	k__Bacteria	p__Proteobacteria	c__Gammaproteobacteria	o__Betaproteobacteriales	f__Burkholderiaceae	f__Burkholderiaceae	f__Burkholderiaceae	0	0	0	0	0	0	0	0	0	0	0	0	0	0	0	0	0	0	0	5	0	0	1	0	1	0	0	0	0	0	0	0	1	0	0	8	0	72	0	0	0	0
4053f4556dafa62593a3e14fe8aab585_rep;size=636;	Unassigned	Unassigned	Unassigned	Unassigned	Unassigned	Unassigned	Unassigned	3	0	3	1	0	0	1	3	1	0	1	0	0	1	0	30	1	1	1	0	1	4	2	1	3	0	9	18	4	0	5	0	8	0	4	28	15	0	1	35	0	0
ebd772ffeaff448224c5158ed4a0ec09_rep;size=633;	Unassigned	Unassigned	Unassigned	Unassigned	Unassigned	Unassigned	Unassigned	29	0	0	2	0	4	0	1	0	0	2	0	37	0	0	2	26	4	2	0	0	2	2	25	2	1	2	7	19	0	6	1	2	0	3	7	4	0	3	3	6	2
ae78bafee46cf6b88790341969aa8df4_rep;size=633;	k__Bacteria	p__Proteobacteria	c__Alphaproteobacteria	o__Sphingomonadales	f__Sphingomonadaceae	g__Sphingomonas	Ambiguous_taxa	0	0	0	1	0	43	0	0	4	150	70	0	0	0	1	0	0	0	23	0	3	0	0	0	0	0	0	0	0	0	0	0	0	2	0	0	0	0	0	0	0	0
ee56bcac1b9714f35143cb699bea67e8_rep;size=632;	Unassigned	Unassigned	Unassigned	Unassigned	Unassigned	Unassigned	Unassigned	2	0	0	0	0	0	1	0	0	16	0	0	0	10	0	7	0	0	0	0	6	1	0	0	5	0	0	4	0	26	0	0	122	0	0	1	10	0	0	14	0	6
6ddf02037104ecca83493876236c10d9_rep;size=628;	k__Bacteria	p__Actinobacteria	c__Actinobacteria	o__Micrococcales	f__Micrococcaceae	f__Micrococcaceae	f__Micrococcaceae	0	0	0	2	2	0	5	4	1	0	0	5	0	81	0	22	0	9	7	0	0	0	1	0	0	11	0	53	1	12	1	0	0	5	8	2	4	2	5	0	4	9
3f3ff0c466ab872e4be90beb1307fd82_rep;size=627;	k__Bacteria	p__Proteobacteria	c__Alphaproteobacteria	o__Sphingomonadales	f__Sphingomonadaceae	f__Sphingomonadaceae	f__Sphingomonadaceae	1	0	1	2	4	7	64	1	0	1	17	1	0	6	0	7	0	7	0	0	10	0	1	1	2	0	0	5	0	5	1	0	5	17	1	48	4	2	0	8	0	0
9abc90d3a342d15362276e792517b452_rep;size=627;	Unassigned	Unassigned	Unassigned	Unassigned	Unassigned	Unassigned	Unassigned	27	0	4	2	0	0	0	5	0	1	0	2	3	2	0	2	0	7	0	0	0	9	3	2	7	4	4	26	5	0	0	0	1	0	16	1	13	1	2	0	3	18
4351ded9104c3f6dcb2e6e1c2bf1b452_rep;size=626;	Unassigned	Unassigned	Unassigned	Unassigned	Unassigned	Unassigned	Unassigned	6	0	1	0	0	0	1	4	0	0	0	0	0	4	1	5	2	0	0	0	0	3	2	1	2	0	4	17	4	0	4	0	3	0	2	21	13	0	0	16	1	0
5eae47f2530bd6006949aa41a0247c97_rep;size=621;	Unassigned	Unassigned	Unassigned	Unassigned	Unassigned	Unassigned	Unassigned	0	0	1	2	0	74	0	0	1	0	1	0	0	0	53	0	0	0	14	8	14	0	0	0	1	0	0	0	3	0	0	0	0	0	0	0	0	0	0	0	0	0
6e58a02945945dbec2ab9dcb203523da_rep;size=621;	Unassigned	Unassigned	Unassigned	Unassigned	Unassigned	Unassigned	Unassigned	11	2	0	4	0	34	2	0	9	0	5	0	1	0	32	2	13	1	18	1	30	0	0	2	3	0	0	4	4	0	2	5	2	1	1	9	5	0	0	0	1	0
6a26431aff7b56f8ec09b0228cb7ddc0_rep;size=620;	k__Bacteria	p__Proteobacteria	c__Gammaproteobacteria	o__Betaproteobacteriales	f__Burkholderiaceae	f__Burkholderiaceae	f__Burkholderiaceae	0	12	0	1	0	0	0	0	152	0	0	0	0	0	0	0	33	0	1	3	0	0	0	0	0	0	0	0	0	0	0	2	0	0	0	0	1	0	1	0	0	0
183e4ae5c4c0579a02ffad3d7dec229c_rep;size=620;	k__Bacteria	p__Proteobacteria	c__Alphaproteobacteria	o__Sphingomonadales	f__Sphingomonadaceae	g__Sphingomonas	Ambiguous_taxa	19	0	0	0	6	0	0	0	0	0	1	1	0	4	1	11	1	0	2	0	1	0	2	0	3	0	0	15	2	0	3	1	2	0	0	0	0	1	4	20	0	0
e7c740e401fa44c44f6b9f3e7e88c821_rep;size=618;	k__Bacteria	p__Proteobacteria	c__Alphaproteobacteria	o__Sphingomonadales	f__Sphingomonadaceae	g__Sphingomonas	g__Sphingomonas	5	0	1	8	0	0	0	1	0	0	0	0	0	0	0	17	0	0	2	0	0	0	4	3	1	0	4	3	3	0	4	1	13	0	1	11	6	0	0	33	0	3
57b0305d44e90119073d71ae3c19bc87_rep;size=616;	k__Bacteria	p__Actinobacteria	c__Actinobacteria	o__Micrococcales	f__Intrasporangiaceae	f__Intrasporangiaceae	f__Intrasporangiaceae	35	0	0	0	0	0	0	6	0	0	0	4	0	15	0	20	0	13	0	0	0	2	26	1	2	24	1	8	3	0	7	0	8	8	7	6	4	5	10	9	35	11
a1067078973548ced03d393dea1ab84a_rep;size=615;	k__Bacteria	p__Proteobacteria	c__Alphaproteobacteria	o__Rhizobiales	f__Rhizobiaceae	g__Allorhizobium-Neorhizobium-Pararhizobium-Rhizobium	g__Allorhizobium-Neorhizobium-Pararhizobium-Rhizobium	5	1	0	0	3	0	2	0	0	0	0	0	0	1	0	11	0	14	0	0	1	0	6	0	10	2	2	6	62	5	12	1	1	0	1	44	0	0	6	6	0	5
0515b3de91fb707af112dee2d23445ee_rep;size=615;	Unassigned	Unassigned	Unassigned	Unassigned	Unassigned	Unassigned	Unassigned	0	0	0	0	0	23	0	0	1	106	65	0	0	0	0	0	0	0	43	1	11	0	0	0	0	0	0	0	1	0	0	0	0	0	0	1	2	0	0	0	0	0
29b65658a6bdb840ec8d056be8953f61_rep;size=610;	k__Bacteria	p__Proteobacteria	c__Alphaproteobacteria	o__Rhizobiales	f__Devosiaceae	g__Devosia	g__Devosia	2	5	3	1	0	0	2	2	0	0	0	0	0	1	0	0	19	10	0	0	0	4	0	1	0	2	5	6	38	0	5	4	1	0	7	87	1	2	33	3	0	6
5e8232102f8f4bf9ef0b6f6bcb971653_rep;size=609;	Unassigned	Unassigned	Unassigned	Unassigned	Unassigned	Unassigned	Unassigned	2	0	0	18	0	75	1	0	0	0	3	0	35	0	6	0	13	0	0	0	0	0	1	20	0	0	0	0	0	0	3	6	6	0	1	0	2	0	0	0	2	0
25792b5230f93fd81d2574e4c2812c02_rep;size=608;	k__Bacteria	p__Proteobacteria	c__Gammaproteobacteria	o__Pseudomonadales	f__Moraxellaceae	g__Acinetobacter	g__Acinetobacter	0	0	0	5	0	0	0	0	0	0	0	0	0	0	0	0	295	0	0	0	0	0	20	0	0	0	0	0	0	0	0	0	2	12	0	0	0	0	0	0	0	0
a1e951556ed62953b470f7186207d57d_rep;size=605;	k__Bacteria	p__Proteobacteria	c__Alphaproteobacteria	o__Sphingomonadales	f__Sphingomonadaceae	g__Sphingomonas	g__Sphingomonas	10	0	0	34	0	40	0	0	14	0	30	0	0	0	0	2	3	0	1	0	2	0	9	2	1	0	0	4	0	0	7	0	27	0	0	2	6	0	2	4	4	0
8104674fa8dc4473b647d8458624c097_rep;size=605;	k__Bacteria	p__Proteobacteria	c__Alphaproteobacteria	o__Rhodobacterales	f__Rhodobacteraceae	g__Paracoccus	g__Paracoccus	24	0	0	0	0	0	0	3	0	0	1	0	0	0	0	8	0	0	0	0	0	0	3	0	3	0	0	10	1	0	5	0	4	0	1	5	14	0	0	13	3	4
1da7afdef6f1204b73fcf8b8082b5163_rep;size=604;	k__Bacteria	p__Proteobacteria	c__Gammaproteobacteria	o__Enterobacteriales	f__Enterobacteriaceae	g__Serratia	g__Serratia	0	0	0	0	0	0	0	0	3	3	0	8	0	0	0	0	0	0	3	0	3	0	0	0	0	0	0	2	0	6	0	0	3	0	0	0	0	0	0	0	0	0
f103c431d43ff03680cdb778e11a0559_rep;size=603;	k__Bacteria	p__Proteobacteria	c__Alphaproteobacteria	o__Rhodobacterales	f__Rhodobacteraceae	g__Paracoccus	g__Paracoccus	27	0	0	5	0	0	0	3	0	0	1	0	0	0	0	1	0	0	0	0	0	0	4	0	0	2	0	9	8	0	8	0	5	0	3	5	11	2	0	17	1	2
7efde4f87cd0a5d3a2ddec7271810457_rep;size=602;	Unassigned	Unassigned	Unassigned	Unassigned	Unassigned	Unassigned	Unassigned	2	0	17	0	1	0	1	12	0	0	0	5	1	3	0	19	2	8	0	0	0	32	2	1	0	0	76	9	2	0	15	0	3	0	2	22	0	0	0	28	9	5
aa604be801beeecf5b24ba6b02905bf1_rep;size=600;	k__Bacteria	p__Actinobacteria	c__Actinobacteria	o__Micrococcales	o__Micrococcales	o__Micrococcales	o__Micrococcales	0	0	0	0	1	1	3	0	0	0	0	5	0	1	0	3	0	1	0	3	0	0	0	0	3	2	1	0	1	102	12	0	1	161	0	6	0	2	30	0	0	0
0ba86f5d8424dc8398bc6d9c6d0c48f1_rep;size=600;	Unassigned	Unassigned	Unassigned	Unassigned	Unassigned	Unassigned	Unassigned	2	0	0	16	0	45	0	0	0	0	0	0	30	0	4	0	3	0	0	0	0	0	0	37	0	0	0	1	0	0	4	2	1	0	0	0	0	0	0	0	3	0
e57594aa9b5972b8293c87dcdd0f7178_rep;size=599;	Unassigned	Unassigned	Unassigned	Unassigned	Unassigned	Unassigned	Unassigned	0	5	3	7	0	0	1	2	1	0	0	1	0	0	3	0	1	0	0	87	0	9	6	0	0	1	8	5	0	0	0	0	30	0	1	1	0	0	0	0	0	25
d8b0b0d0658218ddbad0e06a289f63be_rep;size=597;	Unassigned	Unassigned	Unassigned	Unassigned	Unassigned	Unassigned	Unassigned	6	2	0	0	0	23	0	0	0	0	7	0	1	0	82	1	4	0	3	0	23	0	2	2	2	0	0	3	8	0	0	2	3	0	0	6	3	1	0	3	1	0
4260ace20e104c2958ef8251f7caa7dc_rep;size=596;	Unassigned	Unassigned	Unassigned	Unassigned	Unassigned	Unassigned	Unassigned	0	7	0	0	1	4	0	0	1	0	0	0	0	0	0	0	0	0	0	0	0	0	0	0	0	0	0	0	7	8	0	0	0	0	0	0	0	0	1	0	0	0
3eb9817943decc42faad5b8166aa352f_rep;size=596;	k__Bacteria	p__Proteobacteria	c__Alphaproteobacteria	o__Sphingomonadales	f__Sphingomonadaceae	g__Sphingomonas	g__Sphingomonas	0	0	0	4	0	36	0	0	0	144	70	0	0	0	1	0	0	0	30	0	10	0	0	0	0	0	0	0	0	0	0	0	0	0	0	1	0	0	0	0	0	0
2214d34ea0cf8b438fc42a56d64b63d0_rep;size=595;	Unassigned	Unassigned	Unassigned	Unassigned	Unassigned	Unassigned	Unassigned	0	0	0	0	0	62	0	0	15	0	2	0	0	0	130	0	0	0	48	10	35	0	0	0	0	0	0	3	0	1	0	0	0	0	0	0	0	0	0	0	0	0
e334a81a9e03c47bbe88c4a80f3cd1b5_rep;size=592;	k__Bacteria	p__Actinobacteria	c__Actinobacteria	o__Pseudonocardiales	f__Pseudonocardiaceae	g__Actinomycetospora	Ambiguous_taxa	0	0	0	0	50	1	80	0	0	0	0	12	0	2	1	0	0	3	1	0	0	0	0	0	1	1	0	1	0	32	0	0	1	118	1	86	0	0	3	0	0	0
3650c4cf4f314b92303ab643b846a010_rep;size=592;	k__Bacteria	p__Proteobacteria	c__Alphaproteobacteria	o__Sphingomonadales	f__Sphingomonadaceae	g__Sphingomonas	g__Sphingomonas	0	0	0	6	0	33	0	0	0	138	14	0	0	0	18	0	0	0	17	0	9	0	1	0	0	0	0	0	0	0	0	0	3	0	0	1	0	0	0	0	0	0
f8578bf7a9e20f5c7955611133db668b_rep;size=588;	k__Bacteria	p__Proteobacteria	c__Gammaproteobacteria	o__Enterobacteriales	f__Enterobacteriaceae	f__Enterobacteriaceae	f__Enterobacteriaceae	0	0	18	0	0	0	0	2	6	0	0	4	0	0	0	0	0	7	0	0	0	0	0	0	55	0	0	2	0	1	0	0	54	0	0	0	3	0	0	0	0	0
d62b6009b7a9431489efb1f11379fcba_rep;size=587;	k__Bacteria	p__Proteobacteria	c__Alphaproteobacteria	o__Sphingomonadales	f__Sphingomonadaceae	g__Sphingomonas	g__Sphingomonas	3	0	0	1	0	11	0	0	9	2	32	0	0	0	2	5	0	0	40	0	73	0	1	0	6	0	0	6	1	0	0	0	7	0	2	3	8	0	0	3	0	1
a3bff7f8ea78afa9a2aeb89ab921822e_rep;size=584;	k__Bacteria	p__Proteobacteria	c__Alphaproteobacteria	o__Sphingomonadales	f__Sphingomonadaceae	g__Sphingomonas	g__Sphingomonas	14	1	0	3	2	2	0	0	3	0	0	0	0	1	0	10	1	0	3	0	10	0	5	0	1	0	1	9	2	1	2	0	10	0	3	10	6	0	1	7	13	0
a88cdc43a31f358f5a94798653fd182d_rep;size=582;	k__Bacteria	p__Actinobacteria	c__Actinobacteria	o__Micrococcales	o__Micrococcales	o__Micrococcales	o__Micrococcales	49	2	14	0	0	0	0	11	0	0	0	9	18	1	0	1	6	11	0	0	0	20	0	6	5	0	25	8	0	0	14	1	1	0	3	4	7	0	0	1	6	19
1cd0288eb29dda0ef9c5afa4965d33c1_rep;size=581;	k__Bacteria	p__Proteobacteria	c__Gammaproteobacteria	o__Betaproteobacteriales	f__Burkholderiaceae	g__Massilia	g__Massilia	0	0	0	0	1	0	1	0	0	0	0	0	0	2	0	0	0	1	0	0	0	0	3	0	0	0	0	0	2	0	0	0	0	1	1	0	77	2	0	2	0	0
cab7dd86778f613143e117ab21e214f1_rep;size=580;	k__Bacteria	p__Firmicutes	c__Negativicutes	o__Selenomonadales	f__Veillonellaceae	g__uncultured	s__uncultured Veillonellaceae bacterium	0	0	0	0	0	0	0	0	6	0	0	0	0	0	0	0	0	0	1	0	1	0	0	0	0	0	0	0	0	17	0	0	7	0	0	0	0	0	2	0	0	0
87d662e1ccfdd7bd0f6d01b2dabe4c8d_rep;size=580;	k__Bacteria	p__Actinobacteria	c__Actinobacteria	o__Micrococcales	f__Microbacteriaceae	f__Microbacteriaceae	f__Microbacteriaceae	0	44	0	0	1	0	8	0	1	0	1	8	0	1	2	2	0	10	0	3	0	4	10	0	4	4	2	0	10	6	1	1	6	19	3	1	0	1	8	2	0	3
49fad70c7caadd917a1420087e2e971c_rep;size=579;	k__Bacteria	p__Proteobacteria	c__Alphaproteobacteria	o__Acetobacterales	f__Acetobacteraceae	g__Belnapia	Ambiguous_taxa	4	1	1	0	9	0	2	9	0	0	1	0	0	4	0	10	0	7	0	0	1	0	0	0	8	0	2	5	2	2	0	0	6	0	0	3	1	0	1	33	0	4
16a573e79c820fb5807b9819fcbbba47_rep;size=577;	k__Bacteria	p__Proteobacteria	c__Alphaproteobacteria	o__Sphingomonadales	f__Sphingomonadaceae	f__Sphingomonadaceae	f__Sphingomonadaceae	9	10	0	0	0	12	0	0	1	0	25	0	0	2	1	0	43	0	1	0	27	0	1	4	7	2	0	8	8	0	3	1	4	0	5	3	7	0	1	1	0	0
a232a05c1b269bc0a48b05ca7101d72d_rep;size=577;	k__Bacteria	p__Proteobacteria	c__Alphaproteobacteria	o__Acetobacterales	f__Acetobacteraceae	g__uncultured	g__uncultured	8	0	0	0	24	0	3	2	0	0	0	1	0	15	0	13	0	5	0	0	1	0	5	2	20	1	2	7	24	0	0	0	3	2	0	0	2	0	3	13	0	0
697f2cf6b07625762d255011b4767e5e_rep;size=576;	k__Bacteria	p__Proteobacteria	c__Alphaproteobacteria	o__Rhizobiales	f__Rhizobiaceae	f__Rhizobiaceae	f__Rhizobiaceae	14	0	3	1	5	0	7	6	0	1	1	1	0	6	0	8	2	10	1	0	1	2	7	1	2	2	2	19	6	0	8	1	4	1	13	84	5	4	2	3	0	0
6d2a2a1f4145711ab5c8428bb0e90112_rep;size=576;	k__Bacteria	p__Proteobacteria	c__Gammaproteobacteria	o__Enterobacteriales	f__Enterobacteriaceae	f__Enterobacteriaceae	f__Enterobacteriaceae	0	0	10	0	5	0	0	3	1	1	0	1	0	0	4	1	1	5	0	3	13	1	1	0	4	0	0	0	0	12	0	0	2	0	0	0	1	0	1	2	1	0
39c1cbe95ce22598b638dec0dd1b68ab_rep;size=572;	k__Bacteria	p__Proteobacteria	c__Gammaproteobacteria	o__Betaproteobacteriales	f__Burkholderiaceae	g__Duganella	g__Duganella	0	45	33	2	0	0	0	2	6	0	0	6	0	0	0	2	32	0	1	95	0	0	0	0	4	0	0	0	1	1	0	19	2	6	0	1	0	0	0	0	0	0
f87045bf18de1e8f760333c4b6e37c03_rep;size=572;	k__Bacteria	p__Proteobacteria	c__Gammaproteobacteria	o__Enterobacteriales	f__Enterobacteriaceae	f__Enterobacteriaceae	f__Enterobacteriaceae	0	0	23	0	0	0	2	0	0	0	0	2	0	0	0	1	0	0	1	0	0	0	1	0	7	1	0	4	0	0	0	0	0	0	0	0	0	0	0	3	0	0
3a0c1321ebad1dfbd01b70a09aa6e30b_rep;size=571;	k__Bacteria	p__Bacteroidetes	c__Bacteroidia	o__Flavobacteriales	f__Weeksellaceae	g__Chryseobacterium	g__Chryseobacterium	0	0	0	5	0	4	1	1	0	0	0	6	0	0	0	1	3	0	0	0	0	0	129	0	0	0	0	0	0	4	0	0	0	0	0	2	0	0	343	0	0	0
cd93e0766a85f1bf13d114f485ff6b4f_rep;size=571;	k__Bacteria	p__Proteobacteria	c__Gammaproteobacteria	o__Betaproteobacteriales	f__Burkholderiaceae	g__Massilia	g__Massilia	0	22	3	43	1	7	0	4	0	0	0	1	0	1	0	2	3	0	14	42	0	3	1	0	0	0	2	1	1	0	0	7	0	9	0	0	0	0	0	7	0	2
3a1dc6e0df9a4987a99b3ee5cb8ee44c_rep;size=571;	k__Bacteria	p__Actinobacteria	c__Actinobacteria	o__Micrococcales	f__Cellulomonadaceae	Ambiguous_taxa	Ambiguous_taxa	41	0	0	0	1	0	0	1	0	0	0	1	0	2	0	9	2	3	0	0	2	0	1	2	1	7	2	8	2	0	3	0	3	0	2	6	8	3	0	5	10	1
75dde43fbdff58af53cbc2f855894811_rep;size=569;	k__Bacteria	p__Proteobacteria	c__Alphaproteobacteria	o__Rhizobiales	f__Beijerinckiaceae	g__alphaI cluster	Ambiguous_taxa	0	0	0	0	0	0	0	0	0	0	0	0	0	0	0	0	0	0	0	0	0	0	0	0	1	0	0	0	13	0	0	0	0	0	0	0	0	0	0	0	0	0
863a75b8dc232127f5754a32672f2e4e_rep;size=569;	Unassigned	Unassigned	Unassigned	Unassigned	Unassigned	Unassigned	Unassigned	17	0	2	2	1	0	0	4	0	0	0	0	0	1	0	4	1	0	0	0	7	2	3	0	6	0	2	7	6	0	5	0	24	0	4	7	11	0	2	4	9	4
b242ceb9643814eb4a2a42a5b6491372_rep;size=568;	Unassigned	Unassigned	Unassigned	Unassigned	Unassigned	Unassigned	Unassigned	2	0	8	0	0	0	5	25	0	0	0	3	3	8	0	20	0	2	0	0	0	23	1	2	0	2	67	4	2	0	8	0	3	1	3	13	2	0	0	34	5	10
85fb93aace5e462f5d8e566eb2bfdd96_rep;size=567;	k__Bacteria	p__Actinobacteria	c__Actinobacteria	o__Micrococcales	f__Microbacteriaceae	f__Microbacteriaceae	f__Microbacteriaceae	0	2	1	17	5	0	0	1	0	0	0	51	0	4	0	0	0	24	0	2	0	0	12	0	1	12	0	5	2	4	2	0	0	14	20	4	1	1	0	3	9	5
9dfe4b3b7da835ed365fa84948c188ad_rep;size=566;	k__Bacteria	p__Actinobacteria	c__Actinobacteria	o__Micrococcales	o__Micrococcales	o__Micrococcales	o__Micrococcales	0	3	0	0	0	0	0	0	0	0	0	5	0	0	0	0	0	2	0	25	0	0	4	3	0	0	0	1	3	78	15	0	0	58	1	0	1	0	123	0	0	0
7223832b0243640c2ac2fd255efc282f_rep;size=566;	Unassigned	Unassigned	Unassigned	Unassigned	Unassigned	Unassigned	Unassigned	2	0	0	1	0	0	0	0	1	0	1	0	0	4	1	8	1	0	3	0	8	0	2	0	1	3	1	16	0	0	0	0	9	0	0	0	9	1	0	4	3	0
a8344d85afc3e9a16cbb76ced2bc4c6b_rep;size=565;	Unassigned	Unassigned	Unassigned	Unassigned	Unassigned	Unassigned	Unassigned	3	0	0	6	0	41	0	0	2	1	17	0	0	0	31	2	0	0	15	3	4	0	1	1	5	0	0	2	3	0	0	0	1	4	0	4	2	0	0	0	0	0
969e6405bd54a8ea0ad9c9aa4ed25062_rep;size=563;	k__Bacteria	p__Proteobacteria	c__Alphaproteobacteria	o__Sphingomonadales	f__Sphingomonadaceae	g__Novosphingobium	Ambiguous_taxa	6	2	0	4	0	7	0	0	0	0	5	0	2	0	0	1	18	0	0	17	258	0	1	12	4	0	0	0	0	0	0	2	2	0	0	2	1	0	0	0	0	0
2b364af4f3acffb23bf138229399c60a_rep;size=558;	k__Bacteria	p__Proteobacteria	c__Alphaproteobacteria	o__Sphingomonadales	f__Sphingomonadaceae	g__Sphingobium	g__Sphingobium	2	7	3	10	1	0	0	3	0	0	2	2	0	0	0	2	11	6	0	0	9	0	0	7	25	11	4	6	22	0	0	5	0	0	13	22	3	0	5	5	0	8
e112b962d77a07bbfcdd2444170b5dea_rep;size=556;	k__Bacteria	p__Actinobacteria	c__Actinobacteria	o__Corynebacteriales	f__Nocardiaceae	g__Gordonia	g__Gordonia	0	1	0	0	6	0	1	2	1	1	0	2	0	3	0	2	6	2	8	0	0	2	2	0	2	10	1	0	4	16	7	0	8	11	7	14	1	3	134	0	2	1
b5790ee6062ca82eb3014520de28b3e5_rep;size=553;	k__Bacteria	p__Proteobacteria	c__Alphaproteobacteria	o__Caulobacterales	f__Caulobacteraceae	g__Brevundimonas	Ambiguous_taxa	1	6	2	1	0	2	4	2	0	0	0	0	1	0	0	0	0	0	0	0	0	14	0	1	1	0	3	1	17	0	6	7	2	0	3	37	4	0	0	0	0	1
dd6031441f5ddc5519e52cd9a8797556_rep;size=553;	Unassigned	Unassigned	Unassigned	Unassigned	Unassigned	Unassigned	Unassigned	0	0	0	1	0	0	0	0	0	0	380	0	0	0	8	0	0	0	10	0	3	0	0	0	0	0	0	0	0	0	0	0	0	0	0	0	0	0	0	0	0	0
714b0378efe0b8744e24aa04b48008d3_rep;size=552;	Unassigned	Unassigned	Unassigned	Unassigned	Unassigned	Unassigned	Unassigned	0	0	1	0	0	0	1	0	0	2	0	2	0	0	0	0	0	3	0	0	0	0	1	0	3	0	0	0	0	0	0	0	6	3	0	1	0	0	0	0	0	0
536fd916daf0409cdcf287715da6b33b_rep;size=552;	k__Bacteria	p__Proteobacteria	c__Alphaproteobacteria	o__Sphingomonadales	f__Sphingomonadaceae	g__Sphingomonas	Ambiguous_taxa	0	0	0	0	0	6	0	0	1	0	196	0	0	0	66	0	1	0	45	0	10	0	0	2	0	0	0	1	0	0	0	0	2	2	0	1	1	0	0	0	0	0
b513cd9ed927c5be5a1be171a339f06d_rep;size=548;	k__Bacteria	p__Proteobacteria	c__Alphaproteobacteria	o__Sphingomonadales	f__Sphingomonadaceae	g__Sphingomonas	g__Sphingomonas	3	0	0	0	4	0	3	0	3	8	0	0	0	5	0	2	0	8	0	0	2	0	1	0	10	0	0	14	5	2	0	0	10	0	0	1	17	0	1	16	0	0
8f3f644456ac78f31409aba55ca3af76_rep;size=547;	k__Bacteria	p__Actinobacteria	c__Actinobacteria	o__Micrococcales	o__Micrococcales	o__Micrococcales	o__Micrococcales	0	0	5	1	4	1	7	6	0	1	1	20	117	1	0	0	2	10	0	0	1	0	1	0	0	1	2	0	7	24	30	2	1	9	4	0	4	0	2	4	17	15
31c748beb2ec71546f94ad391425b882_rep;size=547;	k__Bacteria	p__Proteobacteria	c__Alphaproteobacteria	o__Caulobacterales	f__Caulobacteraceae	g__Brevundimonas	g__Brevundimonas	0	0	0	0	0	0	0	0	0	0	0	0	0	0	0	0	0	0	0	0	0	3	0	0	1	0	0	1	33	0	0	6	0	0	0	2	3	0	0	0	0	0
1ae890007555f45560858259e0f61559_rep;size=547;	k__Bacteria	p__Proteobacteria	c__Alphaproteobacteria	o__Sphingomonadales	f__Sphingomonadaceae	g__Sphingomonas	g__Sphingomonas	18	7	0	2	0	8	0	0	34	0	41	0	0	0	0	0	1	0	1	0	21	0	1	1	3	0	0	5	0	1	1	0	19	0	0	3	4	0	0	2	2	0
b4b5cc6beec11d1cf7007cacd559c6d0_rep;size=546;	k__Bacteria	p__Firmicutes	c__Bacilli	o__Bacillales	f__Bacillaceae	g__Bacillus	g__Bacillus	4	0	0	11	14	0	3	0	1	18	1	2	0	4	0	4	0	5	0	0	0	1	4	0	8	0	0	16	0	9	1	0	22	14	1	0	6	0	2	0	6	1
5e6563ee1bede7e7b1b77ac59e1a4e93_rep;size=545;	k__Bacteria	p__Actinobacteria	c__Actinobacteria	o__Micrococcales	f__Dermacoccaceae	g__Dermacoccus	g__Dermacoccus	0	0	1	0	46	0	2	11	0	0	0	10	0	6	0	4	0	32	1	0	0	12	3	0	8	3	6	3	6	0	8	0	0	0	0	0	0	0	2	77	3	2
72fef84a14a58333eb272e4caba4ea1d_rep;size=545;	Unassigned	Unassigned	Unassigned	Unassigned	Unassigned	Unassigned	Unassigned	4	0	0	0	0	0	0	1	0	0	1	1	0	0	0	1	0	5	0	0	0	2	1	0	0	16	2	1	3	0	1	0	1	1	29	13	7	0	0	7	0	5
7c98076388cc0b2563d1b1678fe0b08f_rep;size=545;	k__Bacteria	p__Proteobacteria	c__Alphaproteobacteria	o__Sphingomonadales	f__Sphingomonadaceae	g__Sphingomonas	Ambiguous_taxa	25	0	0	0	1	5	0	0	0	0	10	0	0	0	0	7	3	0	2	0	231	0	2	1	2	0	0	4	0	0	0	0	2	0	0	1	3	0	0	1	1	0
a11357417edc455d84ce0cd91673fb84_rep;size=544;	k__Bacteria	p__Actinobacteria	c__Actinobacteria	o__Frankiales	f__Nakamurellaceae	g__Nakamurella	s__uncultured Nakamurellaceae bacterium	0	0	0	2	12	4	1	0	0	0	0	0	0	0	0	0	0	2	0	0	0	0	1	0	0	0	0	1	0	24	0	0	2	61	1	15	0	0	7	0	0	0
ba4ab8dea6b4223dbc9ed5bbf3ea60ea_rep;size=542;	k__Bacteria	p__Firmicutes	c__Bacilli	o__Lactobacillales	f__Streptococcaceae	g__Streptococcus	s__uncultured bacterium	0	0	0	0	0	0	0	0	0	0	0	0	0	0	0	0	0	0	0	0	0	0	0	0	0	0	0	3	0	0	0	0	0	0	0	0	0	0	0	0	0	0
c2dd0113713014f01bed5263103c5266_rep;size=539;	k__Bacteria	p__Proteobacteria	c__Alphaproteobacteria	o__Rhodospirillales	f__Rhodopirillaceae	g__Defluviicoccus	g__Defluviicoccus	0	0	0	0	0	0	0	0	0	0	0	0	0	0	0	0	0	0	0	0	0	0	0	0	0	0	1	2	0	0	0	0	1	0	0	0	0	0	1	0	0	0
1225f74b321fe607f12bed713b105554_rep;size=538;	k__Bacteria	p__Deinococcus-Thermus	c__Deinococci	o__Deinococcales	f__Deinococcaceae	g__Deinococcus	s__uncultured bacterium	3	0	0	0	2	0	9	2	0	0	0	0	0	20	0	40	0	0	0	0	0	0	0	0	3	0	3	0	4	0	0	0	6	2	0	0	26	0	0	5	2	5
4c52a8029625903bb8c4aa9b40216836_rep;size=538;	k__Bacteria	p__Firmicutes	c__Clostridia	o__Clostridiales	f__Peptostreptococcaceae	f__Peptostreptococcaceae	f__Peptostreptococcaceae	0	1	0	8	0	0	4	12	0	1	0	1	0	0	5	0	0	1	0	0	3	2	217	0	0	0	8	7	3	0	0	0	60	4	0	0	2	1	3	0	0	4
1c37f6c06097de8432f4cd95e15645c9_rep;size=536;	k__Bacteria	p__Bacteroidetes	c__Bacteroidia	o__Cytophagales	f__Cyclobacteriaceae	g__uncultured Aquiflexum sp.	s__uncultured Aquiflexum sp.	0	0	4	0	0	0	2	7	0	0	0	3	0	1	0	0	0	0	0	0	0	0	0	0	0	0	7	475	0	0	10	0	0	0	0	0	1	0	0	0	6	0
016bc33d60c2682231a791021f364ca3_rep;size=534;	k__Bacteria	p__Proteobacteria	c__Alphaproteobacteria	o__Rhodobacterales	f__Rhodobacteraceae	f__Rhodobacteraceae	f__Rhodobacteraceae	18	0	6	0	0	0	1	14	0	0	0	2	0	0	0	1	0	0	0	0	0	19	0	0	0	0	16	22	17	0	17	5	4	0	6	9	19	0	0	21	0	9
c08355a045ed41287c6b77315952049b_rep;size=533;	k__Bacteria	p__Proteobacteria	c__Alphaproteobacteria	o__Rhizobiales	f__Xanthobacteraceae	f__Xanthobacteraceae	f__Xanthobacteraceae	0	254	0	0	0	0	0	0	0	0	0	0	0	0	0	0	0	0	0	0	0	0	0	0	1	0	0	0	2	0	0	1	0	0	0	0	0	0	0	0	0	0
8dd3370490651744e2d38c86ccc9ea82_rep;size=531;	k__Bacteria	p__Proteobacteria	c__Alphaproteobacteria	o__Caulobacterales	f__Caulobacteraceae	g__Brevundimonas	Ambiguous_taxa	0	17	2	1	1	7	0	0	3	0	0	0	2	0	0	0	17	0	0	2	8	4	1	0	0	0	1	1	14	5	3	2	2	0	0	7	0	0	1	0	8	1
c494c0f8755ffb8c2bf710544979917e_rep;size=531;	Unassigned	Unassigned	Unassigned	Unassigned	Unassigned	Unassigned	Unassigned	13	1	0	1	0	0	0	1	1	1	15	0	0	0	0	34	8	1	8	0	4	0	1	1	8	2	1	4	0	0	0	3	11	0	0	9	12	0	0	5	3	3
485602dcc0f041e5a1f507f2708ae81f_rep;size=530;	k__Bacteria	p__Proteobacteria	c__Alphaproteobacteria	o__Sphingomonadales	f__Sphingomonadaceae	g__Novosphingobium	g__Novosphingobium	0	0	0	0	0	0	0	0	0	0	0	0	0	0	0	0	0	0	0	0	0	0	0	18	0	0	0	0	0	0	0	18	0	0	0	0	0	0	0	0	0	0
645a006758649b594b76e287aa84c7f0_rep;size=530;	k__Bacteria	p__Proteobacteria	c__Alphaproteobacteria	o__Rhizobiales	f__Beijerinckiaceae	g__Methylobacterium	Ambiguous_taxa	0	0	0	0	0	8	0	0	0	275	10	0	0	0	9	0	0	0	3	0	0	0	1	0	0	0	0	0	0	0	0	0	0	0	0	0	0	0	0	0	0	0
281120d2b19776d38ed18aba91578b45_rep;size=528;	k__Bacteria	p__Bacteroidetes	c__Bacteroidia	o__Cytophagales	f__Hymenobacteraceae	g__Hymenobacter	g__Hymenobacter	2	0	0	0	8	0	0	0	0	0	20	0	0	3	0	9	0	0	5	0	91	0	0	0	0	0	0	0	0	3	0	0	0	0	0	30	1	0	0	1	0	0
92100e548019189a158100cbdfbde8ea_rep;size=528;	Unassigned	Unassigned	Unassigned	Unassigned	Unassigned	Unassigned	Unassigned	7	0	0	0	0	4	1	1	0	0	3	0	0	0	0	11	2	1	2	1	1	0	0	0	1	0	0	11	7	0	1	1	2	1	0	6	7	0	0	7	3	0
5226d6e0beb92b9b7337c8b8937a6dcc_rep;size=528;	Unassigned	Unassigned	Unassigned	Unassigned	Unassigned	Unassigned	Unassigned	1	0	10	1	0	0	3	15	0	0	0	2	3	7	0	21	5	1	0	0	0	28	0	4	1	0	59	4	4	0	6	0	2	0	2	11	2	1	0	24	4	16
3578892bc7a06dac65d001e648b0ec12_rep;size=527;	k__Bacteria	p__Proteobacteria	c__Alphaproteobacteria	o__Rhizobiales	f__Beijerinckiaceae	g__Methylobacterium	g__Methylobacterium	0	0	0	0	0	2	0	0	0	248	0	0	0	0	0	0	0	0	5	0	0	0	0	0	0	0	0	0	0	0	0	0	0	1	0	0	0	0	0	0	0	0
22442dc407d9f2f73b7a27f6f0d9c378_rep;size=525;	k__Bacteria	p__Proteobacteria	c__Alphaproteobacteria	o__Sphingomonadales	f__Sphingomonadaceae	g__Sphingomonas	g__Sphingomonas	0	53	0	0	0	64	0	0	107	0	2	0	0	0	0	0	0	0	0	26	1	0	0	0	1	2	0	0	0	40	0	0	0	5	0	0	0	0	1	0	0	0
013aa25ec5d9be8c2253ac99899f8dc1_rep;size=524;	k__Bacteria	p__Proteobacteria	c__Gammaproteobacteria	o__Enterobacteriales	f__Enterobacteriaceae	g__Serratia	g__Serratia	0	0	0	0	1	0	0	0	1	0	0	0	0	7	0	0	1	0	0	0	0	0	13	11	0	0	0	57	0	0	2	0	0	0	0	2	0	1	0	0	0	4
85f2c2ccaf77529b73b5e7ed999f2dc9_rep;size=523;	k__Bacteria	p__Proteobacteria	c__Alphaproteobacteria	o__Sphingomonadales	f__Sphingomonadaceae	g__Sphingomonas	Ambiguous_taxa	1	0	0	0	0	19	0	0	0	11	12	0	0	0	339	1	0	0	1	0	0	0	0	0	0	0	0	0	0	0	0	0	0	1	0	0	0	0	0	0	0	0
0007184b0d6b7792b32dcadecbcfd0a8_rep;size=522;	k__Bacteria	p__Proteobacteria	c__Alphaproteobacteria	o__Acetobacterales	f__Acetobacteraceae	g__Roseomonas	g__Roseomonas	7	0	4	0	4	0	20	3	0	2	0	1	0	6	0	6	0	10	1	0	2	0	3	2	11	0	10	2	22	8	0	0	12	0	1	0	1	0	3	12	0	7
b74ef54ae169ca2de05b1554a4ff5cac_rep;size=522;	k__Bacteria	p__Proteobacteria	c__Gammaproteobacteria	o__Betaproteobacteriales	f__Burkholderiaceae	g__Acidovorax	g__Acidovorax	0	0	0	1	0	2	2	0	0	0	0	0	0	2	1	1	8	1	1	128	0	2	0	0	1	0	1	0	0	0	0	0	0	1	0	0	1	0	4	0	0	0
eac606c9bf2f55958479b57e4b5fbb31_rep;size=520;	Unassigned	Unassigned	Unassigned	Unassigned	Unassigned	Unassigned	Unassigned	12	0	1	0	0	5	0	1	0	0	1	0	1	0	0	6	9	1	3	0	1	1	3	1	6	6	3	13	2	0	3	0	9	0	2	2	10	2	0	6	3	3
75847a6b669842024933995f339c255e_rep;size=517;	k__Bacteria	p__Proteobacteria	c__Alphaproteobacteria	o__Caulobacterales	f__Caulobacteraceae	g__Caulobacter	g__Caulobacter	0	7	0	0	0	2	0	0	0	0	0	0	0	0	10	0	0	0	0	3	1	1	0	0	0	0	0	0	1	0	0	2	0	0	0	0	0	0	0	0	0	0
5a7a7eca7e2cbd104197d1eda773b6ae_rep;size=515;	Unassigned	Unassigned	Unassigned	Unassigned	Unassigned	Unassigned	Unassigned	1	0	0	0	6	0	2	0	1	1	0	0	0	1	0	1	0	2	0	0	0	0	0	0	9	0	0	24	1	1	0	0	11	0	0	0	4	0	2	5	0	4
8add697e4df14ffd0c201a6fa476bc8f_rep;size=514;	Unassigned	Unassigned	Unassigned	Unassigned	Unassigned	Unassigned	Unassigned	0	0	0	0	0	0	0	0	0	0	0	0	0	1	0	0	0	0	0	0	0	1	0	0	0	0	0	0	0	0	0	0	0	0	0	0	0	0	0	0	0	0
6fd333b9f3b0e067be90dea289465d31_rep;size=514;	k__Bacteria	p__Proteobacteria	c__Gammaproteobacteria	o__Betaproteobacteriales	f__Burkholderiaceae	g__Pigmentiphaga	Ambiguous_taxa	5	8	0	12	0	4	0	4	2	0	20	0	0	0	0	3	20	0	6	0	15	4	5	0	1	0	0	0	2	3	0	0	5	0	4	23	5	1	3	1	0	0
a31ed9604135839c31b3f6b1bc09b71c_rep;size=511;	k__Bacteria	p__Proteobacteria	c__Alphaproteobacteria	o__Sphingomonadales	f__Sphingomonadaceae	g__Altererythrobacter	Ambiguous_taxa	0	0	0	0	0	0	0	0	0	0	0	0	0	0	0	0	0	0	1	0	4	0	0	0	2	0	0	16	1	0	0	0	1	0	2	17	14	0	0	0	1	2
32ea3720bc6f370b752bcc88dd0a2fd9_rep;size=511;	k__Bacteria	p__Actinobacteria	c__Actinobacteria	o__Micrococcales	f__Brevibacteriaceae	g__Brevibacterium	Ambiguous_taxa	3	1	3	1	0	0	0	5	1	0	0	13	0	6	0	5	0	1	0	0	0	13	0	2	2	15	23	3	7	4	2	0	1	1	10	1	4	4	0	2	1	27
6736dd8297601ed6cce991f074833975_rep;size=510;	Unassigned	Unassigned	Unassigned	Unassigned	Unassigned	Unassigned	Unassigned	0	0	0	0	0	0	0	0	0	0	0	0	0	0	0	5	0	1	0	0	0	0	0	0	0	0	2	2	2	0	0	0	0	0	0	0	2	0	0	0	0	0
ec0f8d58d01fa4d47a5e6a32e073a9b7_rep;size=509;	k__Bacteria	p__Bacteroidetes	c__Bacteroidia	o__Sphingobacteriales	f__Sphingobacteriaceae	g__Pedobacter	Ambiguous_taxa	3	9	0	5	3	6	0	2	0	0	3	4	0	2	0	0	19	6	0	0	2	0	1	3	0	7	2	0	1	1	0	0	4	2	3	8	1	0	28	5	2	4
a65e670bb2a804cd16e49789ca3d3152_rep;size=509;	k__Bacteria	p__Proteobacteria	c__Alphaproteobacteria	o__Sphingomonadales	f__Sphingomonadaceae	g__Rhizorhapis	Ambiguous_taxa	0	0	0	0	0	2	0	0	0	0	0	0	0	0	477	0	0	0	0	0	0	0	0	0	0	0	0	0	0	0	0	1	0	1	0	0	0	1	0	0	0	0
e07e8cda11fde2ec44f93511fd93b38a_rep;size=508;	k__Bacteria	p__Bacteroidetes	c__Bacteroidia	o__Cytophagales	f__Hymenobacteraceae	g__Hymenobacter	s__uncultured bacterium	0	0	0	0	1	0	0	0	0	0	0	0	0	0	0	0	0	0	0	0	0	0	0	0	0	0	0	0	0	0	0	0	0	0	0	0	0	0	0	0	0	0
9493f34fa75a7b2d7d9b5c47118999a3_rep;size=507;	Unassigned	Unassigned	Unassigned	Unassigned	Unassigned	Unassigned	Unassigned	24	0	0	0	0	0	2	4	0	0	0	1	0	9	0	4	1	3	0	0	0	0	4	0	1	8	2	3	4	0	8	0	1	1	8	4	2	0	2	9	6	4
244086410aaba23938d33d7ae2fb534b_rep;size=507;	Unassigned	Unassigned	Unassigned	Unassigned	Unassigned	Unassigned	Unassigned	15	0	1	5	0	1	1	2	3	4	4	0	2	0	0	10	2	1	4	0	9	1	5	3	3	1	1	6	3	0	3	3	4	0	1	8	9	0	0	3	1	0
3a5da85ba6d8316fcbc8844e9fb1e2e2_rep;size=506;	k__Bacteria	p__Proteobacteria	c__Gammaproteobacteria	o__Betaproteobacteriales	f__Burkholderiaceae	g__Aquabacterium	g__Aquabacterium	0	0	0	0	0	2	0	0	0	0	0	0	0	0	0	0	0	0	0	392	72	0	0	0	0	0	0	0	0	1	0	0	0	0	0	0	0	0	0	0	0	0
8bd350beb9bea9b5870aff68f68f3807_rep;size=506;	k__Bacteria	p__Proteobacteria	c__Alphaproteobacteria	o__Sphingomonadales	f__Sphingomonadaceae	g__Sphingomonas	g__Sphingomonas	3	0	0	0	1	6	0	0	4	87	4	0	0	0	63	3	0	0	28	1	4	0	4	0	0	0	0	4	3	0	0	0	2	2	0	0	0	1	0	4	0	0
f18282c81d613c8d416b520d4785cb0e_rep;size=505;	Unassigned	Unassigned	Unassigned	Unassigned	Unassigned	Unassigned	Unassigned	0	1	1	0	0	0	2	1	0	0	0	168	0	5	0	0	0	0	0	109	0	1	0	0	0	0	0	2	0	0	50	1	0	1	1	0	0	0	7	1	3	2
b561dc082c6ca0e277a9dd57d610eda3_rep;size=505;	k__Bacteria	p__Actinobacteria	c__Actinobacteria	o__Propionibacteriales	f__Nocardioidaceae	g__Nocardioides	Ambiguous_taxa	0	0	18	0	3	0	3	8	0	0	0	36	0	0	0	0	0	26	0	0	0	7	0	0	0	28	7	3	7	2	0	0	1	0	15	4	5	0	0	3	0	35
9a8fca832b8dc12ed94d1d1a5801a61e_rep;size=505;	Unassigned	Unassigned	Unassigned	Unassigned	Unassigned	Unassigned	Unassigned	6	0	0	12	0	64	0	0	0	0	1	0	18	0	1	0	8	0	0	0	0	0	0	23	0	0	0	1	1	0	0	5	1	0	0	0	0	0	0	0	3	0
f5b217687fc9d0f6045b03170deb5858_rep;size=504;	k__Bacteria	p__Deinococcus-Thermus	c__Deinococci	o__Deinococcales	f__Deinococcaceae	g__Deinococcus	g__Deinococcus	3	0	0	3	0	0	1	0	9	0	0	0	0	2	0	11	0	0	145	0	0	0	0	0	0	0	0	8	1	0	0	1	0	3	0	5	2	0	0	18	3	2
6b458e8861cb9adc871dee05cab5a6b8_rep;size=504;	Unassigned	Unassigned	Unassigned	Unassigned	Unassigned	Unassigned	Unassigned	8	0	4	0	0	0	1	3	0	0	1	0	0	3	0	0	0	1	0	0	0	8	0	0	0	10	2	16	3	0	2	0	4	0	21	2	18	2	0	3	0	17
46e38a031e6ab538fe901c597e125068_rep;size=503;	k__Bacteria	p__Proteobacteria	c__Alphaproteobacteria	o__Sphingomonadales	f__Sphingomonadaceae	g__Sphingomonas	Ambiguous_taxa	0	0	0	1	0	0	0	0	0	0	283	0	0	0	6	0	0	0	25	0	51	1	0	0	0	0	0	0	0	0	0	0	2	0	0	0	0	0	0	0	0	0
3e752ed132795bf629310c75d942c29a_rep;size=502;	k__Bacteria	p__Proteobacteria	c__Alphaproteobacteria	o__Rhizobiales	f__Beijerinckiaceae	g__Methylobacterium	Ambiguous_taxa	0	0	0	5	0	16	0	0	6	2	195	0	0	0	16	1	0	0	23	2	7	0	0	0	0	0	0	0	0	0	0	0	0	0	0	0	0	0	0	1	0	0
462159337dbe84b206ff1426e05d3128_rep;size=502;	Unassigned	Unassigned	Unassigned	Unassigned	Unassigned	Unassigned	Unassigned	5	0	3	0	0	0	1	8	0	0	0	9	0	4	0	4	0	6	0	0	0	15	2	3	0	13	30	9	2	1	7	0	1	0	7	2	3	9	1	1	9	24
f4c87c33ee7c2b31f8a86a523332c71e_rep;size=500;	k__Bacteria	p__Proteobacteria	c__Alphaproteobacteria	o__Rhodobacterales	f__Rhodobacteraceae	f__Rhodobacteraceae	f__Rhodobacteraceae	2	0	2	4	9	0	5	3	4	0	0	1	0	11	1	3	0	48	0	0	0	1	1	0	4	0	4	9	6	0	2	0	10	1	0	0	3	0	1	10	0	2
0a5ba1464653cc81007e4cc67549fb60_rep;size=500;	k__Bacteria	p__Actinobacteria	c__Actinobacteria	o__Micrococcales	f__Beutenbergiaceae	f__Beutenbergiaceae	f__Beutenbergiaceae	16	1	6	3	5	0	1	10	1	0	1	15	3	1	0	12	2	9	2	0	1	7	1	3	2	6	26	4	3	2	6	4	7	1	3	12	2	1	3	1	4	12
061e938d02d5edccac0fc2fd52fdbdb9_rep;size=499;	k__Bacteria	p__Actinobacteria	c__Actinobacteria	o__Micrococcales	f__Micrococcaceae	f__Micrococcaceae	f__Micrococcaceae	4	1	1	2	0	0	1	11	1	0	0	9	0	5	0	10	0	10	0	0	0	7	0	0	0	11	2	8	1	0	3	0	2	0	10	5	4	3	0	3	12	5
47872252b0d25d2d1b31fdfc56952b9d_rep;size=498;	k__Bacteria	p__Cyanobacteria	c__Oxyphotobacteria	o__Chloroplast	Ambiguous_taxa	Ambiguous_taxa	Ambiguous_taxa	4	0	0	0	9	0	0	0	0	0	0	6	0	6	0	3	0	2	0	0	1	0	0	0	5	0	0	17	1	0	0	0	5	0	0	1	10	0	10	1	0	0
e908c8dca8e02db2aa57cb71e471cd74_rep;size=498;	Unassigned	Unassigned	Unassigned	Unassigned	Unassigned	Unassigned	Unassigned	10	2	2	4	0	4	0	0	0	0	0	0	7	0	0	0	15	0	0	0	6	8	0	4	2	0	5	3	40	0	2	3	0	0	1	6	7	0	0	1	3	1
8a281ef9ec1e3fd698db2de706ff8151_rep;size=497;	k__Bacteria	p__Proteobacteria	c__Alphaproteobacteria	o__Rhizobiales	f__Xanthobacteraceae	g__Xanthobacter	Ambiguous_taxa	0	61	0	3	0	0	0	0	0	0	0	0	0	0	0	0	0	0	0	0	0	0	0	0	8	0	0	0	77	0	0	12	4	0	0	0	0	0	13	0	0	0
adbe15bc025b7a4057016451b4db5593_rep;size=497;	k__Bacteria	p__Proteobacteria	c__Deltaproteobacteria	o__Myxococcales	f__P3OB-42	g__uncultured bacterium	s__uncultured bacterium	0	0	0	13	5	0	0	0	16	0	0	0	0	0	0	1	1	0	35	0	5	0	40	0	0	0	0	0	0	1	1	0	41	24	1	0	0	1	4	0	0	0
099e6ab9aea518a39ddba904920d1c38_rep;size=495;	Unassigned	Unassigned	Unassigned	Unassigned	Unassigned	Unassigned	Unassigned	0	8	0	4	0	48	0	0	122	0	0	0	0	0	1	0	0	0	32	0	0	0	0	0	1	0	0	0	0	0	0	0	0	0	0	0	0	0	0	0	0	0
1b4c1b1c4b483660331beea72ffccd36_rep;size=495;	Unassigned	Unassigned	Unassigned	Unassigned	Unassigned	Unassigned	Unassigned	8	0	2	10	0	0	1	2	0	0	1	0	0	0	0	15	0	1	2	0	0	0	12	0	0	0	1	5	1	0	0	0	7	0	0	12	6	0	0	31	1	1
369ad7ae30b696901ed58a54a62381bc_rep;size=494;	k__Bacteria	p__Proteobacteria	c__Alphaproteobacteria	o__Sphingomonadales	f__Sphingomonadaceae	g__Sphingomonas	g__Sphingomonas	1	0	0	3	0	16	0	1	16	6	64	0	0	0	0	0	0	0	76	4	20	0	0	1	3	0	0	0	0	0	0	0	3	0	0	3	1	0	0	0	0	0
ad1ba202e1218b2529fda783e5c5ee0a_rep;size=494;	k__Bacteria	p__Proteobacteria	c__Alphaproteobacteria	o__Sphingomonadales	f__Sphingomonadaceae	g__Sphingomonas	g__Sphingomonas	0	18	0	0	0	0	0	0	0	0	29	0	0	0	2	0	0	0	0	2	0	4	1	0	0	0	0	0	1	0	0	0	0	0	0	4	0	0	0	0	0	0
c89f2db4d99e9de44b5ec07e05e348db_rep;size=493;	k__Bacteria	p__Proteobacteria	c__Alphaproteobacteria	o__Rhizobiales	f__Xanthobacteraceae	f__Xanthobacteraceae	f__Xanthobacteraceae	0	1	0	1	1	0	0	0	0	0	0	0	0	0	252	1	0	0	1	6	0	0	6	0	0	2	0	2	4	1	0	0	4	3	0	1	0	0	5	0	0	0
810dbce8f7fdd212055cc689493669a1_rep;size=493;	k__Bacteria	p__Firmicutes	c__Clostridia	o__Clostridiales	f__Lachnospiraceae	g__Herbinix	g__Herbinix	0	0	0	0	0	0	0	0	0	0	0	0	0	0	0	0	0	0	0	0	0	0	0	0	0	0	0	0	0	0	0	0	0	0	0	0	0	0	0	0	0	0
bdaea5487ec4d82ff76d99fdbbf5ce49_rep;size=493;	k__Bacteria	p__Proteobacteria	c__Alphaproteobacteria	o__Sphingomonadales	f__Sphingomonadaceae	g__Sphingomonas	Ambiguous_taxa	5	2	0	0	0	2	0	0	85	0	12	0	0	0	0	3	0	0	2	3	1	0	0	0	1	1	1	3	3	0	1	0	0	1	0	0	0	0	0	0	0	0
46a8801b2b01bf48f034b5fad9506a76_rep;size=492;	k__Bacteria	p__Proteobacteria	c__Alphaproteobacteria	o__Sphingomonadales	f__Sphingomonadaceae	g__Sphingomonas	g__Sphingomonas	1	0	0	0	3	2	0	0	28	0	37	0	0	0	0	2	0	0	0	0	0	0	0	1	0	0	5	2	0	0	0	0	0	0	0	1	0	1	1	0	0	0
cc3972883fd7f6156ba7a61c2172183b_rep;size=492;	k__Bacteria	p__Proteobacteria	c__Alphaproteobacteria	o__Sphingomonadales	f__Sphingomonadaceae	g__Sphingomonas	g__Sphingomonas	7	0	0	3	1	43	7	4	4	5	5	0	0	1	7	6	0	1	1	1	3	0	6	0	0	0	0	1	14	0	0	0	3	2	0	3	6	1	3	4	1	1
c7c32eb4f5e4f40b5d2843f3110c73cb_rep;size=490;	k__Bacteria	p__Proteobacteria	c__Alphaproteobacteria	o__Rhizobiales	f__Xanthobacteraceae	f__Xanthobacteraceae	f__Xanthobacteraceae	0	2	0	0	0	13	0	0	1	0	0	0	0	0	8	0	0	0	2	42	0	0	39	0	0	0	0	0	40	9	3	0	2	0	0	0	0	0	0	1	0	0
342168932df7c73858017d730179634e_rep;size=490;	Unassigned	Unassigned	Unassigned	Unassigned	Unassigned	Unassigned	Unassigned	18	0	8	0	0	0	0	14	0	0	0	0	0	2	0	1	0	0	0	0	0	1	0	0	1	0	18	17	10	0	9	2	3	0	4	12	2	0	0	28	1	11
010c981c8894f16a7436aade22ab6ab0_rep;size=490;	k__Bacteria	p__Firmicutes	c__Clostridia	o__Clostridiales	f__Clostridiaceae 1	g__Clostridium sensu stricto 1	s__uncultured bacterium	0	0	0	3	0	0	0	0	0	0	0	1	0	0	311	0	0	0	0	9	0	0	0	0	0	0	0	0	0	21	0	3	0	45	0	13	0	0	0	0	0	0
2d0bac2ccebf305aa3bc8d867586da25_rep;size=490;	k__Bacteria	p__Deinococcus-Thermus	c__Deinococci	o__Deinococcales	f__Deinococcaceae	g__Deinococcus	s__uncultured bacterium	2	0	0	0	0	0	0	0	0	0	3	0	0	0	1	1	0	0	0	0	29	0	1	0	1	0	0	6	1	0	0	0	13	80	0	0	3	1	0	0	0	0
30d5e5d6b40435740bbba5c248e49b77_rep;size=487;	k__Bacteria	p__Proteobacteria	c__Gammaproteobacteria	o__Betaproteobacteriales	f__Burkholderiaceae	g__Massilia	g__Massilia	1	0	0	0	1	9	1	2	1	0	0	1	0	0	0	3	0	1	1	0	0	2	2	2	1	1	0	4	0	0	0	33	4	0	0	0	2	0	29	8	1	0
2c08df411e11d02e04125327af705037_rep;size=485;	k__Bacteria	p__Patescibacteria	c__Saccharimonadia	o__Saccharimonadales	f__uncultured bacterium	g__uncultured bacterium	s__uncultured bacterium	0	1	18	0	0	0	5	27	0	0	0	5	0	0	0	1	0	15	0	0	0	27	5	0	0	3	25	4	2	0	0	2	1	1	7	37	2	2	0	1	1	15
1aeda2aa839121dbc7e2fdc7b5978593_rep;size=485;	k__Bacteria	p__Proteobacteria	c__Alphaproteobacteria	o__Sphingomonadales	f__Sphingomonadaceae	g__Sphingomonas	Ambiguous_taxa	0	0	0	0	0	0	0	3	0	2	10	0	0	0	0	7	0	0	2	0	23	0	0	0	0	0	0	4	2	0	1	0	5	0	0	22	4	0	0	4	0	0
af17bce4fcf792d62d65ed2d61cada13_rep;size=484;	Unassigned	Unassigned	Unassigned	Unassigned	Unassigned	Unassigned	Unassigned	22	0	0	0	1	0	0	7	0	1	0	0	0	13	0	63	1	5	0	0	0	1	2	1	1	8	4	1	1	1	28	0	3	0	2	0	0	0	1	13	13	5
09f09fba132ca13061d253edb564be31_rep;size=481;	Unassigned	Unassigned	Unassigned	Unassigned	Unassigned	Unassigned	Unassigned	1	1	58	1	0	1	0	23	0	0	0	37	1	0	0	0	0	4	0	0	0	35	0	5	1	0	87	1	0	2	6	1	0	0	1	2	0	4	0	0	4	40
3a4418ca882096ef6755972648fd70b5_rep;size=480;	k__Bacteria	p__Proteobacteria	c__Alphaproteobacteria	o__Sphingomonadales	f__Sphingomonadaceae	g__Sphingobium	Ambiguous_taxa	1	2	0	0	0	28	0	1	0	3	0	0	0	0	2	0	0	0	2	30	0	1	0	0	1	1	0	4	2	6	0	2	2	20	1	0	0	0	0	0	1	0
2f93552763f448f9a452c27b2db67b7a_rep;size=478;	k__Bacteria	p__Proteobacteria	c__Alphaproteobacteria	o__Sphingomonadales	f__Sphingomonadaceae	g__Sphingomonas	g__Sphingomonas	4	0	0	1	0	4	1	0	0	0	8	0	0	0	0	0	0	0	2	0	0	0	2	2	0	0	1	1	0	0	0	0	1	0	0	1	0	0	0	0	0	0
13eb830c15677a04bfbee866ec0b7bc2_rep;size=477;	k__Bacteria	p__Bacteroidetes	c__Bacteroidia	o__Flavobacteriales	f__Weeksellaceae	g__Chryseobacterium	Ambiguous_taxa	0	5	15	2	0	0	0	8	0	0	0	7	46	0	0	1	2	13	1	0	0	22	3	0	0	0	8	0	1	2	2	0	0	3	0	3	0	1	0	2	0	8
4d6d7120c8572a5477e9efcb92e80c7f_rep;size=477;	k__Bacteria	p__Proteobacteria	c__Alphaproteobacteria	o__Rhizobiales	f__Beijerinckiaceae	g__Methylobacterium	Ambiguous_taxa	0	0	0	0	0	21	0	0	0	109	1	0	1	0	0	0	0	0	2	0	0	0	0	0	0	0	0	0	0	0	0	0	0	0	0	0	0	0	0	0	0	0
7417ea1b4c934d01a1dc5af1c4e3a13f_rep;size=476;	Unassigned	Unassigned	Unassigned	Unassigned	Unassigned	Unassigned	Unassigned	0	1	0	0	0	0	0	0	0	0	0	0	0	0	0	0	0	0	0	0	0	0	0	0	0	0	0	0	0	0	0	0	0	0	0	0	0	0	0	0	0	0
38d35259d514762b68b01441f4de5ade_rep;size=476;	k__Bacteria	p__Proteobacteria	c__Gammaproteobacteria	o__Betaproteobacteriales	f__Burkholderiaceae	f__Burkholderiaceae	f__Burkholderiaceae	0	0	16	15	2	2	0	2	4	0	0	3	0	0	0	0	3	3	0	135	0	0	0	0	1	0	0	0	0	27	0	0	0	1	0	0	0	0	4	0	0	0
5b1788e6bec5574175ba07a688687247_rep;size=476;	Unassigned	Unassigned	Unassigned	Unassigned	Unassigned	Unassigned	Unassigned	28	2	4	1	1	0	0	7	0	0	0	14	24	1	0	0	3	12	0	0	0	15	2	8	1	4	16	16	3	3	2	0	1	0	6	3	12	4	2	3	5	13
522a84df4b480db3e5f3bc34691d07ae_rep;size=475;	k__Bacteria	p__Bacteroidetes	c__Bacteroidia	o__Cytophagales	f__Hymenobacteraceae	g__Hymenobacter	Ambiguous_taxa	0	0	0	2	0	0	0	0	0	0	160	0	0	1	0	0	0	0	2	0	1	0	0	1	0	0	0	0	0	0	0	0	0	0	1	2	0	12	0	3	0	0
5ccf228cd0429f6f4ad71493aec41a0a_rep;size=475;	k__Bacteria	p__Proteobacteria	c__Alphaproteobacteria	o__Rhizobiales	f__Xanthobacteraceae	g__Ancylobacter	Ambiguous_taxa	0	4	0	0	0	0	0	0	0	0	0	0	0	0	0	0	0	0	0	0	0	0	0	0	0	0	0	0	0	0	0	0	0	0	0	0	0	0	0	0	0	0
17ffb89c215405b7f937c22344a9cecb_rep;size=474;	k__Bacteria	p__Deinococcus-Thermus	c__Deinococci	o__Deinococcales	f__Deinococcaceae	g__Deinococcus	s__uncultured bacterium	0	0	4	0	2	0	2	0	0	1	1	0	0	3	0	1	0	6	0	0	0	0	2	0	4	0	3	5	0	0	0	0	23	0	0	0	4	0	0	1	0	5
474a0a13e0a6f57cdddb49000bdb3baa_rep;size=474;	Unassigned	Unassigned	Unassigned	Unassigned	Unassigned	Unassigned	Unassigned	3	0	0	1	0	0	1	1	4	0	0	0	0	0	0	0	1	0	3	0	1	1	0	0	0	0	0	17	1	0	0	0	6	0	4	2	39	0	0	0	0	1
29fe9c12e8d85d722de846c4e9d45c8f_rep;size=474;	Unassigned	Unassigned	Unassigned	Unassigned	Unassigned	Unassigned	Unassigned	24	0	0	0	0	0	0	0	0	12	0	0	0	0	0	0	0	0	0	0	15	0	0	0	21	0	0	4	0	0	0	3	10	0	0	0	22	0	0	0	0	0
ed8271e6a603bb2878e9e255851021a0_rep;size=473;	k__Bacteria	p__Proteobacteria	c__Alphaproteobacteria	o__Rhizobiales	f__Beijerinckiaceae	f__Beijerinckiaceae	f__Beijerinckiaceae	0	1	0	0	0	0	0	0	0	0	0	0	0	0	0	0	0	0	0	0	0	0	0	0	0	0	0	0	17	0	0	0	0	0	0	0	0	0	0	0	0	0
24f42bca5e73912473c1983e762380e5_rep;size=473;	Unassigned	Unassigned	Unassigned	Unassigned	Unassigned	Unassigned	Unassigned	7	0	2	6	0	1	4	1	0	0	5	0	0	1	0	3	5	2	1	0	4	2	3	2	0	0	4	9	12	0	5	0	0	0	2	17	3	1	0	5	3	4
8c5c9c100128bf3b773db785bbb000dc_rep;size=472;	k__Bacteria	p__Actinobacteria	c__Actinobacteria	o__Micrococcales	f__Intrasporangiaceae	g__Ornithinimicrobium	g__Ornithinimicrobium	0	0	3	0	1	0	0	21	0	0	0	21	0	2	0	3	0	19	2	0	0	10	4	0	0	13	19	7	14	0	0	0	6	0	13	3	2	14	1	1	0	5
aa8963d462acfe066b23477218904808_rep;size=472;	Unassigned	Unassigned	Unassigned	Unassigned	Unassigned	Unassigned	Unassigned	8	0	3	1	0	1	0	4	1	1	0	1	0	0	0	3	2	2	4	0	7	0	4	0	5	0	3	4	4	0	2	0	3	0	1	2	4	1	0	1	3	4
2f9a2cdd6fc67700ca592603d5fab0c3_rep;size=471;	Unassigned	Unassigned	Unassigned	Unassigned	Unassigned	Unassigned	Unassigned	28	0	2	2	1	0	0	11	0	0	0	7	54	2	0	0	1	9	0	0	0	14	1	11	2	3	8	5	3	1	13	0	4	0	3	1	10	2	7	2	3	14
2ca5956010eebc47ca690a4a59a9305b_rep;size=471;	k__Bacteria	p__Actinobacteria	c__Actinobacteria	o__Micrococcales	o__Micrococcales	o__Micrococcales	o__Micrococcales	4	0	0	0	5	0	0	3	0	0	0	1	0	1	0	1	0	2	0	0	0	0	2	1	0	5	0	3	11	76	5	0	0	179	14	6	1	0	5	1	7	0
d57501b44a85f6263ef7c36c9256fb92_rep;size=470;	k__Bacteria	p__Proteobacteria	c__Gammaproteobacteria	o__Betaproteobacteriales	f__Burkholderiaceae	g__Comamonas	g__Comamonas	0	0	1	1	0	0	0	0	157	0	0	3	0	0	0	0	0	0	0	0	0	2	0	0	0	0	0	0	0	0	0	0	0	0	0	0	0	0	0	0	0	0
574f7205190596a193b4405a45eae751_rep;size=469;	k__Bacteria	p__Proteobacteria	c__Alphaproteobacteria	o__Rhodobacterales	f__Rhodobacteraceae	g__Paracoccus	g__Paracoccus	0	1	0	6	1	0	0	0	0	0	1	0	0	1	1	6	0	0	0	0	1	0	0	1	0	0	4	5	9	0	0	0	2	0	0	49	1	0	0	9	0	1
8c8dccf3e1d2c946f66d30744a112ec1_rep;size=467;	k__Bacteria	p__Proteobacteria	c__Alphaproteobacteria	o__Rhizobiales	f__Rhizobiaceae	f__Rhizobiaceae	f__Rhizobiaceae	0	0	0	3	0	2	29	0	0	0	0	0	0	0	0	0	0	2	0	0	0	0	0	1	0	0	1	0	0	3	2	10	0	0	0	32	0	0	0	0	4	1
ff104ea35209842ed50fcf2a5781a4b0_rep;size=466;	k__Bacteria	p__Proteobacteria	c__Alphaproteobacteria	o__Rhizobiales	f__Devosiaceae	g__Devosia	g__Devosia	1	2	1	7	1	0	0	1	0	0	0	2	0	3	0	0	3	3	0	0	0	19	0	0	8	0	1	2	8	0	13	9	5	31	3	21	2	0	0	2	2	0
5585b840e05e60621ba6720daa649ff3_rep;size=466;	k__Bacteria	p__Actinobacteria	c__Actinobacteria	o__Micrococcales	o__Micrococcales	o__Micrococcales	o__Micrococcales	0	0	0	0	0	0	0	0	0	0	0	30	0	0	0	0	0	1	0	0	0	0	0	0	0	0	0	0	0	0	0	0	0	2	0	0	0	2	0	0	0	1
edf3204db23245e32f02504fce67e1e0_rep;size=466;	k__Bacteria	p__Proteobacteria	c__Alphaproteobacteria	o__Sphingomonadales	f__Sphingomonadaceae	g__Sphingomonas	g__Sphingomonas	5	4	0	3	0	2	1	0	1	0	8	0	0	0	0	14	1	0	8	0	24	0	2	0	4	1	0	6	4	0	0	0	6	0	0	0	0	0	0	5	0	2
df3d6113f855e22f2a6d44e60f01baa7_rep;size=465;	k__Bacteria	p__Firmicutes	c__Clostridia	o__Clostridiales	f__Peptostreptococcaceae	f__Peptostreptococcaceae	f__Peptostreptococcaceae	14	0	0	1	14	0	22	14	1	12	1	0	0	1	0	1	0	17	0	0	2	0	8	0	1	0	15	10	5	3	0	0	4	1	1	2	5	0	0	2	1	12
dd949369c6cd3952ec577561053fb833_rep;size=465;	k__Bacteria	p__Actinobacteria	c__Actinobacteria	o__Micrococcales	f__Microbacteriaceae	g__Microbacterium	g__Microbacterium	0	0	0	3	0	0	0	1	0	0	0	23	1	4	0	0	1	3	1	0	0	0	3	0	1	1	0	0	26	11	8	2	0	51	0	6	0	2	31	0	3	0
e31c716050be00a29f2ad35d811785a5_rep;size=464;	k__Bacteria	p__Proteobacteria	c__Alphaproteobacteria	o__Sphingomonadales	f__Sphingomonadaceae	g__Sphingomonas	g__Sphingomonas	0	0	1	0	1	0	0	0	0	0	1	0	0	0	0	1	0	0	0	0	0	1	0	0	1	0	0	0	24	0	0	0	0	1	0	0	0	0	0	0	0	0
54b0ea6d4bb94add033ab67cbd88fd19_rep;size=463;	k__Bacteria	p__Bacteroidetes	c__Bacteroidia	o__Chitinophagales	f__Chitinophagaceae	g__uncultured	g__uncultured	30	0	0	0	0	0	0	2	0	0	4	0	0	0	0	2	0	0	0	0	0	0	0	6	14	0	0	0	2	0	0	6	10	1	0	3	3	0	1	0	0	1
a6a73d378c9cf39b7c60a3f5c317aaf1_rep;size=462;	Unassigned	Unassigned	Unassigned	Unassigned	Unassigned	Unassigned	Unassigned	0	0	0	3	0	13	0	0	11	1	172	0	0	0	0	0	0	0	30	1	20	0	0	0	4	0	0	0	0	0	0	0	0	0	0	0	0	0	0	1	0	0
f254a57521756b39dd871ec461f6ff18_rep;size=462;	Unassigned	Unassigned	Unassigned	Unassigned	Unassigned	Unassigned	Unassigned	6	1	1	1	0	0	0	1	0	0	0	0	1	1	0	8	21	1	0	0	0	18	0	0	0	0	6	1	22	0	5	2	1	1	3	35	7	0	1	12	1	4
7438ed3843901e4313f728068bb9078e_rep;size=462;	k__Bacteria	p__Proteobacteria	c__Alphaproteobacteria	o__Sphingomonadales	f__Sphingomonadaceae	g__Sphingomonas	Ambiguous_taxa	2	0	0	0	0	28	0	0	0	15	84	0	0	0	46	0	0	0	20	3	3	0	0	0	2	0	1	1	0	1	0	0	0	2	0	1	0	0	0	5	0	0
d3cccc6990b10e9d2c891afb84613ed1_rep;size=462;	Unassigned	Unassigned	Unassigned	Unassigned	Unassigned	Unassigned	Unassigned	12	0	0	9	1	0	1	1	1	0	1	0	0	0	0	2	0	2	0	0	1	0	3	1	4	0	0	11	2	0	0	0	3	0	1	18	7	0	0	3	2	0
14f2c05d81c230ba1964da82aa42c5fc_rep;size=461;	k__Bacteria	p__Proteobacteria	c__Gammaproteobacteria	o__Pseudomonadales	f__Moraxellaceae	g__Acinetobacter	g__Acinetobacter	0	0	0	6	0	0	0	0	0	0	0	0	0	0	1	0	192	0	0	0	0	0	4	0	0	0	0	1	0	0	0	0	2	6	0	0	0	0	0	0	0	0
466bb4b760857d7721fb9e9fe5864eec_rep;size=461;	k__Bacteria	p__Firmicutes	c__Bacilli	o__Bacillales	f__Staphylococcaceae	g__Jeotgalicoccus	g__Jeotgalicoccus	0	1	5	0	0	0	0	21	0	0	0	12	0	0	0	0	0	3	0	0	0	132	0	0	0	0	35	0	0	0	0	0	0	4	0	0	0	0	0	1	0	52
29188c84fa85f5e6a90a160227c1199b_rep;size=461;	Unassigned	Unassigned	Unassigned	Unassigned	Unassigned	Unassigned	Unassigned	14	0	16	1	0	0	2	7	0	0	0	0	1	2	0	5	1	4	0	0	0	19	1	1	7	0	16	14	9	0	7	0	1	0	4	20	11	0	1	3	1	12
760a168c2a6c87f6d1cd0976979c3bc0_rep;size=460;	k__Bacteria	p__Bacteroidetes	c__Bacteroidia	o__Flavobacteriales	f__Flavobacteriaceae	g__Flavobacterium	Ambiguous_taxa	0	2	1	0	0	0	0	0	0	0	0	0	0	10	2	0	7	0	0	0	0	0	0	13	1	0	0	0	0	0	0	0	0	1	0	0	0	0	290	0	1	0
85bb3554c4d0f4f9fe9a02b5ed4383e9_rep;size=460;	k__Bacteria	p__Actinobacteria	c__Actinobacteria	o__Micrococcales	f__Micrococcaceae	f__Micrococcaceae	f__Micrococcaceae	4	0	1	0	0	0	2	4	0	0	0	2	0	2	0	5	0	1	0	0	0	6	0	0	2	8	4	4	0	0	0	0	2	1	6	1	9	0	0	1	7	2
336679d1080e641abc9f93f8f4c133f7_rep;size=460;	Unassigned	Unassigned	Unassigned	Unassigned	Unassigned	Unassigned	Unassigned	25	0	0	0	0	0	0	9	0	0	0	0	0	18	0	66	0	6	0	0	0	0	7	0	2	2	0	2	1	0	23	0	3	3	1	0	1	0	0	15	18	6
124a731e701f3e9514ed4a6b4a8da4f6_rep;size=459;	k__Bacteria	p__Actinobacteria	c__Actinobacteria	o__Micrococcales	f__Micrococcaceae	g__Kocuria	g__Kocuria	0	0	17	0	0	0	2	15	0	0	0	21	3	4	0	6	1	18	0	0	0	15	2	8	0	4	32	0	4	0	23	0	0	0	1	13	0	5	0	8	12	20
f07b4ac5fec3bfbfa16573971de0e7f3_rep;size=458;	Unassigned	Unassigned	Unassigned	Unassigned	Unassigned	Unassigned	Unassigned	2	0	0	0	1	0	0	0	3	0	0	0	0	0	0	0	0	2	2	0	2	1	1	0	0	1	1	15	1	0	0	0	2	0	2	0	45	0	0	4	0	5
535da2be63ff56b8ac2efdddc2f8adef_rep;size=458;	Unassigned	Unassigned	Unassigned	Unassigned	Unassigned	Unassigned	Unassigned	32	0	1	0	0	0	1	0	0	0	0	1	28	0	0	2	14	3	0	0	3	3	1	17	4	2	3	2	18	0	6	1	3	6	1	13	7	0	0	7	3	0
3f49b5fefc8bdba563b6de6b5d524e6e_rep;size=458;	k__Bacteria	p__Proteobacteria	c__Alphaproteobacteria	o__Sphingomonadales	f__Sphingomonadaceae	g__Sphingomonas	g__Sphingomonas	0	0	0	3	0	34	0	0	0	96	49	0	0	0	1	0	0	0	13	0	2	0	0	0	0	0	0	0	1	0	0	0	0	0	0	0	0	0	0	0	0	0
be5fb5a5e7ff1732803ff9c430e82495_rep;size=456;	k__Bacteria	p__Proteobacteria	c__Alphaproteobacteria	o__Sphingomonadales	f__Sphingomonadaceae	f__Sphingomonadaceae	f__Sphingomonadaceae	0	0	0	1	2	0	0	0	1	0	42	0	0	0	14	0	0	0	0	0	5	0	0	0	0	0	0	3	0	0	0	0	0	6	0	6	0	0	0	3	0	1
aa78aece8f5194ae471814fef77250e0_rep;size=455;	k__Bacteria	p__Actinobacteria	c__Actinobacteria	o__Micrococcales	f__Micrococcaceae	g__Kocuria	g__Kocuria	1	0	4	0	2	0	0	9	0	0	0	6	0	16	0	11	0	20	0	0	0	11	3	0	0	6	6	0	7	0	0	0	4	1	0	13	0	2	0	92	1	14
016442b314cd12467bc3a780fff72f6e_rep;size=454;	k__Bacteria	p__Proteobacteria	c__Alphaproteobacteria	o__Acetobacterales	f__Acetobacteraceae	g__Roseomonas	Ambiguous_taxa	0	0	0	6	1	31	0	0	0	0	4	0	0	0	0	2	1	0	1	4	6	0	0	0	1	0	0	2	2	0	0	0	0	7	0	0	0	2	1	5	1	0
e1d20571bc799e95650922c7fa144a98_rep;size=454;	k__Bacteria	p__Actinobacteria	c__Actinobacteria	o__Micrococcales	f__Micrococcaceae	g__Kocuria	g__Kocuria	27	0	0	0	0	0	2	7	0	0	0	1	0	10	0	62	0	9	0	0	0	0	2	1	3	7	3	2	5	0	27	0	5	0	3	0	1	1	0	20	11	4
e238a889dcf21e7ecd706c5a5f045922_rep;size=453;	k__Bacteria	p__Actinobacteria	c__Actinobacteria	o__Micrococcales	f__Micrococcaceae	f__Micrococcaceae	f__Micrococcaceae	3	0	0	11	0	0	0	1	0	1	5	0	0	0	0	3	0	1	0	0	2	0	3	0	4	7	0	17	2	0	0	0	4	1	5	9	4	0	1	0	1	0
8613782744f5f22f33414663a4ea51f7_rep;size=452;	k__Bacteria	p__Proteobacteria	c__Alphaproteobacteria	o__Rhodobacterales	f__Rhodobacteraceae	g__Paracoccus	g__Paracoccus	0	0	0	0	3	0	279	1	0	0	0	0	0	0	0	2	0	0	0	0	0	0	1	0	1	0	0	0	1	0	0	0	0	0	0	3	1	0	0	8	0	0
9d2b4028f757c482e15ffaaf11fecd92_rep;size=452;	k__Bacteria	p__Actinobacteria	c__Actinobacteria	o__Micrococcales	f__Micrococcaceae	g__Kocuria	g__Kocuria	6	0	6	0	0	0	0	20	0	0	0	4	0	16	0	16	1	12	0	0	1	5	3	11	0	1	20	0	1	0	29	0	0	0	3	2	0	0	0	3	0	19
b9185c0a67e665773df3362bce725234_rep;size=451;	Unassigned	Unassigned	Unassigned	Unassigned	Unassigned	Unassigned	Unassigned	8	0	0	1	0	10	0	0	4	32	1	0	0	0	23	1	0	0	19	1	2	0	2	0	0	0	1	9	16	1	0	0	2	1	0	0	1	0	1	0	0	0
1a329447e1232cba1171e55d69337966_rep;size=451;	k__Bacteria	p__Proteobacteria	c__Gammaproteobacteria	o__Betaproteobacteriales	f__Burkholderiaceae	g__Acidovorax	g__Acidovorax	1	0	0	8	1	0	1	0	0	0	0	0	0	0	0	0	0	0	0	164	0	2	0	0	0	0	0	0	0	2	2	0	0	0	0	0	0	0	5	0	0	0
686d8d2d609b925d66aee16919a3474c_rep;size=451;	k__Bacteria	p__Actinobacteria	c__Actinobacteria	o__Micrococcales	f__Micrococcaceae	g__Kocuria	g__Kocuria	0	1	5	1	0	0	4	13	0	0	0	26	6	4	0	10	2	18	0	0	0	10	6	4	0	4	24	0	8	0	11	0	0	0	2	8	0	2	0	4	14	21
659009e60da95c434b34ecbc13a255ad_rep;size=450;	Unassigned	Unassigned	Unassigned	Unassigned	Unassigned	Unassigned	Unassigned	0	9	0	0	0	2	0	0	0	1	8	0	0	0	0	0	0	0	0	0	3	0	0	0	2	0	0	0	19	0	3	63	0	6	0	0	1	0	2	1	0	0
1799bb6fa3baa5becf58a1b7909fe4e0_rep;size=450;	k__Bacteria	p__Firmicutes	c__Bacilli	o__Lactobacillales	f__Lactobacillaceae	g__Lactobacillus	g__Lactobacillus	0	0	0	14	0	0	0	0	0	0	0	0	0	0	0	0	0	0	0	0	0	0	1	0	0	23	0	0	0	0	0	0	0	53	119	0	0	18	0	0	0	0
38d1019bc1263c34e41412e8a1ac5e86_rep;size=449;	Unassigned	Unassigned	Unassigned	Unassigned	Unassigned	Unassigned	Unassigned	1	2	50	0	0	1	0	31	0	0	0	31	0	1	0	0	2	3	0	0	0	27	0	7	0	0	93	2	0	0	11	0	2	0	1	4	0	2	2	0	9	33
b956d9367f4aa2588094bde763a282ce_rep;size=448;	Unassigned	Unassigned	Unassigned	Unassigned	Unassigned	Unassigned	Unassigned	0	0	0	2	0	34	1	0	9	62	45	0	0	0	0	0	1	0	48	0	4	0	0	0	3	0	0	0	0	0	0	0	2	0	0	1	0	0	0	2	0	0
b718bab42b45f08cc855122eaffc05c6_rep;size=448;	Unassigned	Unassigned	Unassigned	Unassigned	Unassigned	Unassigned	Unassigned	0	4	1	2	0	0	0	0	0	0	0	0	0	0	0	0	1	1	0	2	0	0	0	2	0	0	0	0	21	0	0	0	0	0	0	33	2	0	0	3	0	1
5eaa2752a4cf194e089e30cad2e9400a_rep;size=445;	k__Bacteria	p__Proteobacteria	c__Alphaproteobacteria	o__Rhodobacterales	f__Rhodobacteraceae	f__Rhodobacteraceae	f__Rhodobacteraceae	1	1	14	0	0	0	0	22	0	0	0	2	0	0	0	3	1	4	0	0	0	10	0	0	0	0	30	7	4	0	3	2	1	0	3	9	6	0	1	4	0	8
87d0e6fb6dac41e451110689e90022cb_rep;size=445;	k__Bacteria	p__Proteobacteria	c__Alphaproteobacteria	o__Sphingomonadales	f__Sphingomonadaceae	g__Sphingomonas	Ambiguous_taxa	0	0	0	2	0	0	0	0	3	0	19	0	0	0	0	0	0	0	5	1	0	0	1	0	0	0	0	0	0	9	0	0	5	1	0	6	0	0	6	1	0	0
11325c2f00dc5fb151e6ad6f77f68c2c_rep;size=445;	Unassigned	Unassigned	Unassigned	Unassigned	Unassigned	Unassigned	Unassigned	2	2	1	0	0	0	0	0	0	0	1	0	0	0	0	0	7	0	0	0	2	15	2	3	1	0	1	2	8	0	4	2	1	1	1	16	2	0	3	4	1	7
2223d0dcf37a3d18255e8469a2c9640e_rep;size=443;	k__Bacteria	p__Proteobacteria	c__Alphaproteobacteria	o__Rhodobacterales	f__Rhodobacteraceae	g__Paracoccus	g__Paracoccus	1	0	7	1	0	0	0	6	0	0	0	0	0	1	0	12	2	0	1	0	4	1	1	0	0	0	3	21	4	0	3	0	6	0	2	20	5	0	2	21	1	3
1943673f46f3a29c3ed51251101ce650_rep;size=443;	k__Bacteria	p__Firmicutes	c__Bacilli	o__Lactobacillales	f__Streptococcaceae	g__Streptococcus	s__uncultured bacterium	0	0	0	0	0	0	0	0	0	0	0	0	0	0	0	0	0	0	0	0	0	0	0	0	0	0	0	0	0	0	0	0	0	0	0	0	0	0	0	0	0	0
23b2fbb05e3d995d221336170b67a7e8_rep;size=443;	k__Bacteria	p__Proteobacteria	c__Alphaproteobacteria	o__Sphingomonadales	f__Sphingomonadaceae	g__Sphingomonas	Ambiguous_taxa	0	0	0	22	0	157	0	0	0	3	36	0	2	0	5	0	0	0	0	2	0	0	8	1	0	0	0	0	0	0	0	0	1	0	0	0	0	0	0	0	0	0
8220410b372d52deadae35666cfe2c6f_rep;size=442;	k__Bacteria	p__Proteobacteria	c__Alphaproteobacteria	o__Sphingomonadales	f__Sphingomonadaceae	g__Sphingomonas	g__Sphingomonas	10	2	1	2	0	3	0	1	17	0	13	0	0	0	0	1	5	0	34	0	35	0	1	0	3	0	0	4	1	0	0	2	14	1	3	2	9	2	0	2	1	0
6d4bb3a426951bf9ad7bee53479cce44_rep;size=442;	k__Bacteria	p__Proteobacteria	c__Alphaproteobacteria	o__Rhodobacterales	f__Rhodobacteraceae	f__Rhodobacteraceae	f__Rhodobacteraceae	1	0	0	0	0	0	1	12	0	0	0	0	0	0	0	0	0	2	0	0	0	2	0	0	2	4	4	15	1	0	1	0	1	0	11	2	17	1	0	0	1	14
ecef4493752677d0d3759adf1f30bdcf_rep;size=442;	k__Bacteria	p__Proteobacteria	c__Alphaproteobacteria	o__Sphingomonadales	f__Sphingomonadaceae	g__Sphingomonas	g__Sphingomonas	1	0	0	3	0	18	0	0	11	10	71	0	0	0	2	0	0	0	85	0	25	0	1	0	0	0	0	1	0	0	0	0	1	1	0	0	0	0	0	1	0	0
c60f1d98e827a16670a077790dda7e0d_rep;size=442;	k__Bacteria	p__Proteobacteria	c__Gammaproteobacteria	o__Betaproteobacteriales	f__Burkholderiaceae	g__Massilia	g__Massilia	1	0	5	0	0	1	2	4	0	2	1	3	0	1	0	2	0	4	1	0	0	0	2	0	0	0	2	9	3	0	0	1	8	0	0	0	4	0	4	19	0	1
c972b9bd396742323a16dc600421d97b_rep;size=441;	Unassigned	Unassigned	Unassigned	Unassigned	Unassigned	Unassigned	Unassigned	0	0	0	0	0	0	0	0	0	0	0	0	0	0	0	0	0	0	0	0	0	0	3	0	0	0	1	0	0	0	0	0	0	0	0	0	0	0	0	0	0	0
269adf1f829b25f5099af6a02dff2111_rep;size=439;	k__Bacteria	p__Actinobacteria	c__Actinobacteria	o__Frankiales	f__Nakamurellaceae	g__Nakamurella	Ambiguous_taxa	0	0	0	0	16	0	0	0	4	0	0	5	0	0	0	0	0	0	0	0	3	0	4	0	0	28	1	1	2	2	0	0	1	1	18	10	0	0	1	2	0	3
78780951524dccdddc86051cd1910fb3_rep;size=439;	k__Bacteria	p__Firmicutes	c__Bacilli	o__Bacillales	f__Family XII	g__Exiguobacterium	g__Exiguobacterium	0	0	1	0	0	0	1	2	0	0	0	0	0	5	0	2	2	2	0	0	1	7	7	0	2	1	6	12	0	0	3	0	0	0	2	0	2	1	0	7	3	2
eb85f7c519487bd81358d5a945155a19_rep;size=438;	k__Bacteria	p__Actinobacteria	c__Actinobacteria	o__Micrococcales	f__Dermatophilaceae	g__uncultured	s__uncultured bacterium	1	0	13	0	0	0	0	54	0	0	0	11	2	0	0	1	0	0	0	0	0	78	0	1	0	0	118	0	0	0	4	1	0	0	0	2	0	0	2	1	3	74
5bd4617ddef59acea2c16a190b259696_rep;size=438;	Unassigned	Unassigned	Unassigned	Unassigned	Unassigned	Unassigned	Unassigned	3	0	1	0	1	1	1	3	0	0	2	0	1	1	0	0	0	3	0	0	0	1	1	2	7	2	0	8	3	0	10	0	3	0	4	10	7	2	0	3	2	2
bfbdc7da83b502768e63a083d4f9c6cf_rep;size=437;	k__Bacteria	p__Proteobacteria	c__Gammaproteobacteria	o__Betaproteobacteriales	f__Burkholderiaceae	f__Burkholderiaceae	f__Burkholderiaceae	4	0	0	1	0	2	1	0	9	0	47	0	0	0	0	3	5	0	86	5	9	0	0	0	4	0	0	4	1	4	0	1	6	0	0	2	1	0	1	1	0	0
4b1aae04cf44acf01a79cce35db25cd7_rep;size=437;	Unassigned	Unassigned	Unassigned	Unassigned	Unassigned	Unassigned	Unassigned	30	0	1	1	0	0	0	0	46	0	0	0	0	0	0	0	0	1	0	0	20	0	0	4	5	0	0	0	0	2	0	0	2	0	0	0	3	0	0	0	0	0
d11a73cfb1abe9ee6faed17c8a3406a9_rep;size=436;	k__Bacteria	p__Proteobacteria	c__Gammaproteobacteria	o__Betaproteobacteriales	f__Burkholderiaceae	g__Burkholderia-Caballeronia-Paraburkholderia	g__Burkholderia-Caballeronia-Paraburkholderia	0	0	0	0	0	0	0	0	0	0	0	0	0	0	0	0	0	0	0	0	0	0	0	0	0	0	0	0	0	0	0	0	0	0	0	0	0	0	0	0	0	0
f2ca4b3da5f9e96eff45fabbe87cf4b9_rep;size=436;	k__Bacteria	p__Actinobacteria	c__Actinobacteria	o__Micrococcales	f__Microbacteriaceae	g__Pseudoclavibacter	Ambiguous_taxa	11	0	0	4	0	0	0	2	0	0	0	0	0	4	0	5	2	4	0	0	4	0	0	0	2	2	0	12	2	1	1	0	5	0	1	12	6	2	1	4	2	0
0e9ef324dde8e00ff6d3402f27fe4d66_rep;size=435;	k__Bacteria	p__Proteobacteria	c__Gammaproteobacteria	o__Betaproteobacteriales	f__Burkholderiaceae	g__Noviherbaspirillum	g__Noviherbaspirillum	0	0	1	0	5	0	4	7	0	2	1	2	0	4	0	18	0	3	1	0	2	0	0	0	4	0	0	6	5	0	0	0	15	0	0	25	3	0	0	18	0	2
eae3658d5d2392e88fe401a08c89c92f_rep;size=433;	k__Bacteria	p__Proteobacteria	c__Alphaproteobacteria	o__Sphingomonadales	f__Sphingomonadaceae	g__Rhizorhapis	Ambiguous_taxa	0	7	0	0	0	58	0	0	0	0	7	0	0	0	9	0	0	0	0	6	0	0	0	0	0	0	0	3	5	5	0	0	0	13	0	0	0	0	0	0	0	0
60d9278112bef9bc5bd0f80e1ea3c2f5_rep;size=433;	Unassigned	Unassigned	Unassigned	Unassigned	Unassigned	Unassigned	Unassigned	2	0	23	0	0	0	1	49	0	0	0	5	2	2	0	0	0	1	0	0	0	60	0	1	0	0	129	1	0	0	3	0	1	0	0	8	0	0	0	1	1	70
03962db95d6f50b88a6c110e85968a42_rep;size=432;	k__Bacteria	p__Proteobacteria	c__Gammaproteobacteria	o__Betaproteobacteriales	f__Burkholderiaceae	f__Burkholderiaceae	f__Burkholderiaceae	1	10	0	0	0	0	1	2	0	1	0	0	0	0	0	5	0	0	2	0	6	1	0	0	0	0	3	32	0	0	3	0	3	0	6	13	4	0	0	3	0	1
b9a6534b9b61caf19df943c63505cce4_rep;size=432;	Unassigned	Unassigned	Unassigned	Unassigned	Unassigned	Unassigned	Unassigned	0	0	0	1	0	0	0	0	11	175	3	0	0	0	1	0	0	0	18	0	6	0	2	0	0	0	0	2	0	0	0	0	2	0	1	2	1	0	0	0	0	0
9c058d567348b32c5cb442c46e87a480_rep;size=431;	Unassigned	Unassigned	Unassigned	Unassigned	Unassigned	Unassigned	Unassigned	9	0	0	2	0	22	0	0	0	0	6	0	0	0	29	1	6	0	5	2	11	0	0	0	0	0	3	5	5	1	0	2	4	2	0	1	6	0	0	5	0	0
c66072e05bd2f5ffd788a22a4d3bb200_rep;size=431;	k__Bacteria	p__Proteobacteria	c__Alphaproteobacteria	o__Sphingomonadales	f__Sphingomonadaceae	g__Sphingomonas	g__Sphingomonas	10	0	0	1	0	0	0	0	0	3	5	0	0	0	4	6	0	0	0	0	1	0	0	0	0	0	0	11	2	0	0	1	9	0	0	8	17	0	0	11	0	1
b39f72fe07d081efe35eb3771fbbaf1c_rep;size=430;	k__Bacteria	p__Proteobacteria	c__Alphaproteobacteria	o__Rhizobiales	f__Xanthobacteraceae	g__Ancylobacter	Ambiguous_taxa	0	127	0	0	0	0	0	0	0	0	0	0	0	0	0	0	0	0	0	0	0	0	0	0	0	0	0	0	0	0	0	0	1	0	0	0	0	0	0	0	0	0
d27d6d835c7a85c7904209dda739b6c5_rep;size=428;	k__Bacteria	p__Proteobacteria	c__Alphaproteobacteria	o__Rhizobiales	f__Beijerinckiaceae	g__Methylobacterium	Ambiguous_taxa	0	0	0	0	0	1	0	0	0	51	78	0	0	0	1	0	0	0	9	3	0	0	0	0	0	0	0	0	0	0	0	0	0	0	0	0	0	0	0	0	0	0
830d0a71d34ce5e62557ed9ccf0b202d_rep;size=428;	Unassigned	Unassigned	Unassigned	Unassigned	Unassigned	Unassigned	Unassigned	7	0	1	0	1	0	3	3	0	0	0	0	0	0	0	3	0	1	1	0	0	4	0	0	1	9	6	17	0	0	1	0	4	0	16	6	13	0	0	11	0	7
f699f176671ec47f6f9ea590cdf2c63d_rep;size=428;	Unassigned	Unassigned	Unassigned	Unassigned	Unassigned	Unassigned	Unassigned	25	0	2	1	0	0	0	0	35	0	0	0	0	0	0	1	0	0	1	0	11	0	0	3	3	3	0	0	0	0	0	0	1	0	0	3	1	0	0	0	0	0
90c43bad20332f592ab46e8bf5b97abc_rep;size=427;	k__Bacteria	p__Proteobacteria	c__Gammaproteobacteria	o__Betaproteobacteriales	f__Rhodocyclaceae	g__Sulfuritalea	Ambiguous_taxa	0	0	0	1	0	0	0	0	0	0	0	0	0	0	0	0	0	0	0	423	0	0	0	0	0	0	0	0	0	0	0	0	0	0	0	0	0	0	0	0	0	0
c5319f81aa12afab427cbb84becf2c66_rep;size=426;	k__Bacteria	p__Proteobacteria	c__Alphaproteobacteria	o__Rhizobiales	f__Devosiaceae	g__Devosia	g__Devosia	0	4	0	3	0	2	0	0	0	0	0	0	0	0	0	0	0	0	1	108	0	0	0	0	0	2	0	0	0	9	0	0	0	12	0	11	0	0	0	0	0	0
0924ae5aa59e3b909221993f246a4c61_rep;size=426;	k__Bacteria	p__Proteobacteria	c__Alphaproteobacteria	o__Sphingomonadales	f__Sphingomonadaceae	g__Sphingomonas	g__Sphingomonas	0	0	0	3	0	4	0	0	1	0	124	0	0	0	0	1	0	0	15	0	20	0	0	1	1	0	0	1	1	1	0	0	5	0	0	3	0	0	0	2	0	2
22d3fc298d37c0dbcd56c18c484afac1_rep;size=425;	k__Bacteria	p__Proteobacteria	c__Alphaproteobacteria	o__Sphingomonadales	f__Sphingomonadaceae	g__Sphingomonas	g__Sphingomonas	4	0	0	0	0	2	0	0	29	0	19	0	0	0	0	1	0	0	54	0	75	0	0	0	0	0	0	4	0	0	0	0	8	0	0	2	6	0	0	2	0	0
d1cc713dc1d1930f43976588822c1e7a_rep;size=425;	k__Bacteria	p__Actinobacteria	c__Actinobacteria	o__Micrococcales	f__Dermabacteraceae	g__Brachybacterium	Ambiguous_taxa	5	0	0	1	0	0	5	5	0	0	0	4	0	5	0	35	0	3	0	0	0	0	4	1	3	7	0	3	1	0	0	0	2	0	7	0	4	1	0	15	11	4
103ab4cd3a3723d6996f5a8b5083ef93_rep;size=424;	k__Bacteria	p__Actinobacteria	c__Actinobacteria	o__Micrococcales	f__Micrococcaceae	g__Kocuria	g__Kocuria	14	0	0	2	1	0	0	5	0	0	0	0	0	2	0	4	1	7	0	0	0	1	3	2	4	4	3	6	3	0	0	1	5	0	2	14	6	1	2	10	1	3
4cfc900c18c392d437aab2ee6401498f_rep;size=424;	Unassigned	Unassigned	Unassigned	Unassigned	Unassigned	Unassigned	Unassigned	0	0	22	0	0	0	0	44	0	0	0	10	0	0	0	0	0	1	0	0	0	99	0	0	0	0	137	0	0	0	0	0	0	0	0	0	0	0	0	0	1	66
99ff4f9960ab67fc22ca5b67f910b986_rep;size=423;	Unassigned	Unassigned	Unassigned	Unassigned	Unassigned	Unassigned	Unassigned	5	0	2	0	1	0	8	3	0	0	0	1	0	0	0	3	0	3	0	0	0	3	0	0	2	2	2	16	1	0	1	0	2	2	6	5	23	0	0	5	3	2
8a6a47c53a0c00061c0c9829adcc53d3_rep;size=422;	k__Bacteria	p__Proteobacteria	c__Alphaproteobacteria	o__Acetobacterales	f__Acetobacteraceae	g__Roseomonas	Ambiguous_taxa	4	2	5	0	0	0	0	3	0	0	0	0	0	0	0	3	16	2	0	0	0	0	0	3	1	10	0	6	2	0	7	0	3	1	16	0	1	1	0	0	0	11
96934c30fe720d577f87ba849257e5bf_rep;size=422;	Unassigned	Unassigned	Unassigned	Unassigned	Unassigned	Unassigned	Unassigned	0	0	0	0	0	0	0	0	0	0	0	0	0	0	0	0	1	0	0	0	0	0	0	0	0	0	0	0	128	0	0	0	5	0	0	0	2	0	0	0	0	0
ef0fea3d888c5a5b78da079b630b608f_rep;size=422;	Unassigned	Unassigned	Unassigned	Unassigned	Unassigned	Unassigned	Unassigned	3	0	0	0	3	0	0	0	0	2	0	0	0	4	1	3	0	0	0	0	0	0	0	0	17	0	0	41	0	1	0	0	15	0	0	0	7	0	2	7	0	0
57479caffd549362e122107cd8307391_rep;size=421;	k__Bacteria	p__Proteobacteria	c__Gammaproteobacteria	o__Betaproteobacteriales	f__Burkholderiaceae	f__Burkholderiaceae	f__Burkholderiaceae	1	0	1	0	3	0	13	1	0	0	0	0	0	17	0	24	0	0	1	0	0	0	2	0	2	0	1	13	2	0	0	0	1	1	0	2	0	0	0	0	0	0
9b39ab915e70b0a66d0800b2fe146196_rep;size=420;	k__Bacteria	p__Bacteroidetes	c__Bacteroidia	o__Flavobacteriales	f__Weeksellaceae	g__Chryseobacterium	Ambiguous_taxa	0	1	3	10	0	5	0	3	0	0	0	2	22	0	0	5	0	2	0	2	0	4	12	1	0	3	2	1	0	2	1	1	0	4	3	2	0	4	3	0	2	1
91a4bac83e7829773261acfa35df404b_rep;size=419;	k__Bacteria	p__Proteobacteria	c__Alphaproteobacteria	o__Caulobacterales	f__Caulobacteraceae	g__Brevundimonas	Ambiguous_taxa	3	14	0	5	0	3	0	1	2	0	0	0	0	0	0	0	49	0	0	0	5	1	4	0	0	0	0	0	12	0	0	0	0	1	0	0	1	0	14	1	0	0
1a147002c30033f9277c3b20484e0f2f_rep;size=418;	k__Bacteria	p__Proteobacteria	c__Gammaproteobacteria	o__Betaproteobacteriales	f__Burkholderiaceae	f__Burkholderiaceae	f__Burkholderiaceae	0	0	0	0	0	0	0	0	0	0	0	0	0	0	0	0	33	0	0	380	0	0	0	0	0	0	0	0	0	0	0	0	0	0	0	0	0	0	0	0	0	0
f7ba3565af8345b24d99054391961cec_rep;size=418;	k__Bacteria	p__Actinobacteria	c__Actinobacteria	o__Micrococcales	f__Micrococcaceae	g__Kocuria	g__Kocuria	33	0	9	0	0	0	1	6	0	0	0	6	38	2	0	0	4	9	0	0	1	7	0	6	2	2	15	8	0	0	11	0	1	0	5	1	7	1	1	2	4	14
f9f895a9978e2cb9e9d9357abeb3edbc_rep;size=417;	k__Bacteria	p__Firmicutes	c__Bacilli	o__Bacillales	f__Bacillaceae	g__Bacillus	Ambiguous_taxa	0	0	0	11	0	1	264	2	1	0	0	0	0	0	0	0	0	0	0	0	10	0	1	0	0	0	0	1	0	0	0	0	0	7	0	7	0	0	0	0	37	0
f1bf3672b867df9bf18f55ca9660c4e0_rep;size=417;	k__Bacteria	p__Actinobacteria	c__Actinobacteria	o__Micrococcales	f__Micrococcaceae	f__Micrococcaceae	f__Micrococcaceae	0	0	0	0	17	0	0	0	0	0	0	0	0	0	0	0	0	0	0	0	0	0	1	0	0	7	0	3	1	0	0	0	0	0	2	136	1	0	0	0	0	3
5aefe7fa5c49603b8761e8f4024f190b_rep;size=416;	k__Bacteria	p__Proteobacteria	c__Alphaproteobacteria	o__Sphingomonadales	f__Sphingomonadaceae	f__Sphingomonadaceae	f__Sphingomonadaceae	0	1	0	0	0	0	0	0	0	0	2	0	0	0	2	0	0	0	1	39	7	1	0	0	0	0	0	3	10	1	0	1	7	2	0	0	3	0	0	0	0	0
b06bf90218e80eb8b261c0d6afa0c10d_rep;size=415;	k__Bacteria	p__Proteobacteria	c__Alphaproteobacteria	o__Caulobacterales	f__Caulobacteraceae	g__Brevundimonas	g__Brevundimonas	0	1	0	0	0	0	0	0	0	0	0	0	0	0	0	0	0	0	0	0	0	0	0	5	0	0	0	0	110	0	0	4	0	0	1	0	0	0	2	0	0	1
9120f717aa2e6fb0c738f37fc4022173_rep;size=414;	k__Bacteria	p__Proteobacteria	c__Alphaproteobacteria	o__Caulobacterales	f__Caulobacteraceae	g__Asticcacaulis	Ambiguous_taxa	0	0	0	0	0	0	0	0	0	0	0	0	0	0	0	0	0	0	0	3	0	0	2	1	0	0	1	0	0	0	0	0	0	2	0	0	0	0	0	0	0	0
dfdf5b4cc9759f118609401cb26bebeb_rep;size=414;	k__Bacteria	p__Actinobacteria	c__Actinobacteria	o__Micrococcales	f__Micrococcaceae	g__Kocuria	g__Kocuria	7	0	6	1	0	0	1	11	0	0	0	17	3	9	0	8	2	9	0	0	0	8	2	4	2	2	32	3	7	0	5	0	0	0	0	4	4	2	1	5	8	16
b3cf96510b98e2074f4ae627c62e5b7e_rep;size=412;	k__Bacteria	p__Actinobacteria	c__Actinobacteria	o__Micrococcales	f__Microbacteriaceae	f__Microbacteriaceae	f__Microbacteriaceae	14	2	0	15	0	0	0	0	2	0	1	0	0	1	0	0	0	1	1	0	5	0	4	0	3	1	0	6	6	1	0	0	1	4	1	5	5	0	3	1	1	1
51202e8a82a73344136fd2192b4cc7d5_rep;size=410;	k__Bacteria	p__Proteobacteria	c__Alphaproteobacteria	o__Sphingomonadales	f__Sphingomonadaceae	g__Sphingomonas	g__Sphingomonas	0	4	0	3	0	14	0	0	7	3	5	0	0	1	0	0	7	0	8	1	66	0	0	0	1	0	1	2	3	2	0	0	10	0	0	11	5	0	0	0	2	0
f84c05940b107455819ecac3e16a01e1_rep;size=410;	k__Bacteria	p__Proteobacteria	c__Alphaproteobacteria	o__Sphingomonadales	f__Sphingomonadaceae	g__Sphingomonas	g__Sphingomonas	0	0	0	2	0	16	0	0	3	141	39	0	0	0	0	0	0	0	19	1	0	0	1	0	0	0	0	0	0	0	0	0	0	0	0	1	0	0	0	1	0	0
3c8dbe76f7a46cb18ec337da0e717f61_rep;size=409;	Unassigned	Unassigned	Unassigned	Unassigned	Unassigned	Unassigned	Unassigned	0	0	0	0	0	39	0	0	1	48	47	0	0	0	14	0	0	0	24	1	3	0	0	0	0	0	0	0	0	0	0	0	2	0	0	1	0	0	0	1	0	0
a55a240f219cdea7f1ac9a7c8d6ba921_rep;size=408;	k__Bacteria	p__Proteobacteria	c__Alphaproteobacteria	o__Acetobacterales	f__Acetobacteraceae	f__Acetobacteraceae	f__Acetobacteraceae	0	0	0	0	0	0	0	0	0	0	0	0	0	0	0	0	0	0	0	0	0	0	0	0	0	0	0	0	0	0	0	0	0	0	0	0	0	0	0	0	0	0
9c7762885db6f2132f9dd191b408b7c6_rep;size=407;	Unassigned	Unassigned	Unassigned	Unassigned	Unassigned	Unassigned	Unassigned	1	0	0	0	31	0	16	6	0	0	0	5	0	13	0	2	0	6	0	0	0	1	3	0	3	1	1	2	7	9	0	0	0	40	0	0	0	3	7	6	1	0
36ce4c0bbe01376e7d5c4aa5988f4dfc_rep;size=406;	k__Bacteria	p__Proteobacteria	c__Alphaproteobacteria	o__Sphingomonadales	f__Sphingomonadaceae	g__Sphingomonas	g__Sphingomonas	3	0	0	4	2	8	0	0	20	7	44	0	0	0	0	0	0	0	92	0	24	0	0	0	3	0	0	0	1	1	0	0	3	0	0	0	0	0	0	0	0	0
fbe691d950f9776a16d7f72bf9b7f0c0_rep;size=406;	k__Bacteria	p__Proteobacteria	c__Alphaproteobacteria	o__Rhodobacterales	f__Rhodobacteraceae	g__Paracoccus	g__Paracoccus	2	0	11	0	0	0	0	15	0	0	0	3	0	5	0	17	0	2	0	0	0	27	1	1	0	0	50	4	0	0	4	0	0	0	4	22	2	1	0	21	4	11
9d0b8e285dfa6122f880355f496ad07e_rep;size=406;	k__Bacteria	p__Proteobacteria	c__Alphaproteobacteria	o__Sphingomonadales	f__Sphingomonadaceae	g__Sphingomonas	g__Sphingomonas	4	0	0	0	0	7	0	0	18	5	24	0	0	0	0	2	0	0	55	0	55	0	2	0	1	0	0	3	1	0	0	0	4	0	0	0	0	0	0	1	0	0
2c9d9a5c76c269f18175850696c7518c_rep;size=405;	k__Bacteria	p__Proteobacteria	c__Alphaproteobacteria	o__Rhizobiales	f__Beijerinckiaceae	g__Methylobacterium	Ambiguous_taxa	0	0	0	3	0	1	0	0	0	1	165	0	0	0	2	0	0	0	2	0	0	0	0	0	0	0	0	0	0	0	0	0	0	0	0	0	0	0	0	0	0	0
8f10df9f9b231c2387f8a8be00248777_rep;size=403;	k__Bacteria	p__Actinobacteria	c__Actinobacteria	o__Micrococcales	f__Micrococcaceae	f__Micrococcaceae	f__Micrococcaceae	11	0	1	1	0	0	0	3	0	0	0	14	10	6	0	0	2	11	1	0	0	0	13	3	2	14	1	0	7	0	0	0	0	5	9	9	3	5	5	1	3	2
6853fbca95f545b26507b06719194eb8_rep;size=403;	k__Bacteria	p__Firmicutes	c__Bacilli	o__Bacillales	f__Staphylococcaceae	g__Staphylococcus	g__Staphylococcus	0	0	0	1	0	0	0	0	0	0	0	1	0	0	0	0	0	0	0	0	0	0	0	0	0	0	0	0	0	0	0	0	1	4	0	0	0	0	1	0	0	6
caf744989f28cebde868ec06f98229e7_rep;size=402;	k__Bacteria	p__Actinobacteria	c__Actinobacteria	o__Micrococcales	f__Micrococcaceae	g__Kocuria	Ambiguous_taxa	1	2	1	6	0	1	2	2	4	5	1	0	0	2	0	4	0	0	3	0	0	1	2	1	2	1	0	6	0	0	0	0	5	0	3	7	3	0	0	3	3	0
b870966e8fe217762d5611691ee509fd_rep;size=401;	k__Bacteria	p__Proteobacteria	c__Alphaproteobacteria	o__Sphingomonadales	f__Sphingomonadaceae	g__Sphingomonas	Ambiguous_taxa	1	0	0	0	0	4	0	0	1	180	14	0	0	0	0	0	0	0	24	0	0	0	0	0	0	0	0	0	0	0	0	0	0	0	0	0	1	1	0	0	0	0
7616c988ae2e04d80d385e20d273cdff_rep;size=401;	k__Bacteria	p__Proteobacteria	c__Alphaproteobacteria	o__Sphingomonadales	f__Sphingomonadaceae	g__Sphingomonas	g__Sphingomonas	1	0	0	1	0	24	0	0	0	0	23	0	0	0	5	0	12	0	0	0	8	0	1	2	2	0	0	2	6	1	1	1	2	1	0	1	6	0	0	0	0	1
58046ab41562fc1db9dd82b2893313dd_rep;size=400;	k__Bacteria	p__Firmicutes	c__Clostridia	o__Clostridiales	f__Clostridiaceae 1	g__Clostridium sensu stricto 1	g__Clostridium sensu stricto 1	0	0	0	0	0	2	0	0	1	0	0	0	0	0	1	0	1	1	1	113	0	0	0	29	0	0	0	1	0	0	1	0	0	3	0	0	0	0	1	0	3	0
c58c1f351df6a2fec805eaf6222cf1eb_rep;size=400;	Unassigned	Unassigned	Unassigned	Unassigned	Unassigned	Unassigned	Unassigned	0	3	0	1	0	0	0	0	0	0	0	0	2	0	5	6	0	1	1	0	0	0	0	0	0	0	0	9	6	0	0	0	2	0	3	22	3	0	0	0	0	0
30b2c929a9b4cdd13ddeb65155c70378_rep;size=399;	Unassigned	Unassigned	Unassigned	Unassigned	Unassigned	Unassigned	Unassigned	11	0	0	0	0	0	1	3	0	0	0	0	1	2	0	5	0	1	0	0	0	0	7	0	1	1	1	9	2	0	0	1	5	3	6	5	6	0	0	16	6	1
6b3cd70646631c2f1611cd90665366a8_rep;size=399;	Unassigned	Unassigned	Unassigned	Unassigned	Unassigned	Unassigned	Unassigned	1	0	0	3	0	0	0	0	2	0	9	0	0	0	0	1	0	0	2	0	19	0	3	0	0	0	0	4	1	0	1	0	0	0	0	3	5	0	0	1	1	0
77558a8e4e55501c941383812c9bcad6_rep;size=398;	k__Bacteria	p__Proteobacteria	c__Alphaproteobacteria	o__Sphingomonadales	f__Sphingomonadaceae	g__Sphingomonas	g__Sphingomonas	3	0	0	0	1	13	0	0	0	0	19	0	0	0	25	4	4	0	5	0	5	0	5	3	1	1	0	6	2	0	1	0	3	0	0	3	5	2	0	4	0	0
53b7652c95ee0fac8a452219095f320c_rep;size=398;	Unassigned	Unassigned	Unassigned	Unassigned	Unassigned	Unassigned	Unassigned	1	0	0	3	0	23	0	0	3	5	8	0	0	0	5	0	0	0	31	4	1	0	0	0	6	0	0	0	0	0	0	0	0	0	0	1	0	0	0	0	0	0
cda5d5d094252ab3229de261fe782af0_rep;size=398;	Unassigned	Unassigned	Unassigned	Unassigned	Unassigned	Unassigned	Unassigned	10	0	0	0	0	2	0	0	0	0	4	0	0	7	0	11	1	2	0	0	4	0	3	1	2	0	3	6	0	0	5	0	9	0	1	5	1	1	1	21	0	4
61ca12f84436fba7b6628ea2265001f0_rep;size=398;	k__Bacteria	p__Actinobacteria	c__Actinobacteria	o__Micrococcales	f__Dermabacteraceae	g__Brachybacterium	Ambiguous_taxa	1	0	1	0	1	0	5	5	0	0	0	1	0	3	0	16	1	4	0	0	1	8	1	0	3	3	3	7	2	0	1	0	4	0	6	3	4	2	1	0	4	9
7f30193618b4d2c5f2a59837298b59be_rep;size=397;	k__Bacteria	p__Actinobacteria	c__Actinobacteria	o__Micrococcales	f__Micrococcaceae	g__Nesterenkonia	g__Nesterenkonia	0	4	58	0	0	0	1	9	0	0	0	44	0	1	0	0	0	4	0	0	0	39	0	7	0	0	112	0	1	2	3	0	0	1	0	2	0	0	2	2	2	12
da0950ea32a541457b9071b16ee8e8d9_rep;size=397;	k__Bacteria	p__Proteobacteria	c__Alphaproteobacteria	o__Rhizobiales	f__Beijerinckiaceae	g__Methylobacterium	Ambiguous_taxa	1	0	0	1	0	11	0	0	11	8	54	0	0	0	4	3	0	0	95	0	8	0	0	0	4	0	0	1	0	0	0	1	0	0	0	0	0	0	0	0	0	0
04409c001c6161d6ec9900fccc781be1_rep;size=396;	k__Bacteria	p__Chloroflexi	c__Chloroflexia	o__Thermomicrobiales	f__JG30-KF-CM45	g__uncultured bacterium	s__uncultured bacterium	0	0	1	0	9	0	2	5	1	0	0	1	0	1	0	0	0	11	1	0	0	5	1	0	0	18	0	14	0	1	1	0	3	2	15	1	7	14	9	0	0	1
01353923e2e6219198b8d092099e0d9f_rep;size=395;	k__Bacteria	p__Firmicutes	c__Bacilli	o__Lactobacillales	f__Carnobacteriaceae	g__Carnobacterium	g__Carnobacterium	0	0	1	12	1	0	0	0	185	0	0	0	0	0	0	2	0	1	0	3	0	0	0	0	0	0	0	0	0	0	0	0	0	0	0	0	1	0	0	2	0	1
1c2a646537e8cef10507216212a33429_rep;size=394;	Unassigned	Unassigned	Unassigned	Unassigned	Unassigned	Unassigned	Unassigned	9	6	0	0	0	2	0	0	0	0	0	0	6	0	0	0	57	0	0	5	0	0	0	11	3	0	0	0	9	0	1	1	0	0	0	1	0	0	1	1	0	2
f0f19b8892caa12a277e2ecc8bcba0d2_rep;size=392;	Unassigned	Unassigned	Unassigned	Unassigned	Unassigned	Unassigned	Unassigned	0	0	0	0	0	0	0	0	0	0	0	0	0	0	0	0	0	0	0	0	0	0	0	0	0	0	0	0	0	0	0	0	0	0	0	0	0	0	0	0	0	0
6b108e3721381d4b756467bdf93fcb62_rep;size=392;	k__Bacteria	p__Proteobacteria	c__Alphaproteobacteria	o__Sphingomonadales	f__Sphingomonadaceae	g__Sphingobium	Ambiguous_taxa	1	6	0	0	0	42	0	0	0	1	10	0	0	0	1	2	33	0	1	0	3	0	1	10	10	0	1	1	0	0	2	1	3	0	0	0	2	0	0	0	0	0
6f330b7d20811dbe1e4c2cbb327124f5_rep;size=391;	k__Bacteria	p__Proteobacteria	c__Alphaproteobacteria	o__Sphingomonadales	f__Sphingomonadaceae	g__Sphingomonas	Ambiguous_taxa	3	0	0	2	0	0	3	2	0	0	0	0	0	0	0	5	1	1	1	0	0	0	1	0	2	1	0	12	5	0	0	0	1	0	1	10	5	0	0	6	1	0
5534e11397022404762d44ab91d28793_rep;size=391;	k__Bacteria	p__Firmicutes	c__Bacilli	o__Lactobacillales	f__Aerococcaceae	g__Facklamia	s__uncultured bacterium	3	0	2	0	1	0	1	3	0	0	1	3	0	4	0	0	1	7	0	0	0	21	1	4	2	3	11	7	0	0	10	0	2	1	4	0	9	1	0	0	1	14
a788add6cbb97f6356e2a6c7968fadeb_rep;size=390;	k__Bacteria	p__Proteobacteria	c__Alphaproteobacteria	o__Rhodobacterales	f__Rhodobacteraceae	g__Rubellimicrobium	Ambiguous_taxa	3	0	0	15	31	0	28	0	0	1	0	0	0	2	0	1	0	8	0	0	1	0	2	0	3	0	0	15	26	0	0	0	3	0	0	2	10	0	0	8	0	2
9a24c53948a060a82d579cc9012e1f3f_rep;size=390;	k__Bacteria	p__Proteobacteria	c__Alphaproteobacteria	o__Rhizobiales	f__Beijerinckiaceae	g__1174-901-12	s__uncultured bacterium	3	0	0	0	2	0	5	2	68	4	0	3	0	1	1	0	0	0	1	0	0	0	0	0	1	0	0	3	0	8	0	0	3	0	0	0	0	0	1	0	0	0
d4e1945e4c168086591e73dd97ce9a7b_rep;size=390;	Unassigned	Unassigned	Unassigned	Unassigned	Unassigned	Unassigned	Unassigned	8	0	0	18	4	0	0	0	1	0	2	0	0	0	0	0	1	0	0	0	1	0	78	1	0	0	0	6	0	1	1	1	29	2	0	0	0	0	1	0	1	0
44b877085f4e5a4cac0aec6fbbee14f0_rep;size=390;	k__Bacteria	p__Deinococcus-Thermus	c__Deinococci	o__Deinococcales	f__Deinococcaceae	g__Deinococcus	s__uncultured bacterium	4	0	3	0	5	0	12	0	3	0	0	0	0	12	0	0	0	3	0	0	0	0	0	0	12	0	2	5	2	0	0	0	13	0	0	2	6	0	0	1	0	2
a806728e958053afb4cb031e558a9729_rep;size=390;	k__Bacteria	p__Actinobacteria	c__Actinobacteria	o__Micrococcales	f__Micrococcaceae	f__Micrococcaceae	f__Micrococcaceae	0	0	0	0	0	0	1	1	0	0	0	3	0	2	0	12	1	5	0	0	0	6	0	0	0	13	2	6	3	0	3	0	1	0	1	0	1	5	0	1	3	4
82e29df833469a3076f4c2c9ee8789f2_rep;size=390;	k__Bacteria	p__Proteobacteria	c__Alphaproteobacteria	o__Sphingomonadales	f__Sphingomonadaceae	g__Sphingomonas	g__Sphingomonas	2	0	0	0	0	4	0	1	13	13	31	0	0	0	0	3	0	0	99	0	12	0	3	0	2	0	0	2	2	1	0	0	2	0	0	1	1	0	0	0	0	0
19ca88b74755fcd0bac50e2c49348732_rep;size=389;	k__Bacteria	p__Proteobacteria	c__Alphaproteobacteria	o__Caulobacterales	f__Caulobacteraceae	g__Brevundimonas	Ambiguous_taxa	0	41	0	0	0	0	0	0	3	0	0	0	0	0	0	0	0	0	0	0	0	1	0	0	0	0	0	0	83	0	0	0	0	2	0	0	0	0	0	1	0	0
b09c57e23b77c9dbc8c29887d6bb4761_rep;size=389;	k__Bacteria	p__Proteobacteria	c__Gammaproteobacteria	o__Betaproteobacteriales	f__Burkholderiaceae	g__Massilia	s__uncultured bacterium	0	0	0	3	1	0	0	0	0	0	1	0	0	0	0	6	8	1	0	0	0	0	0	0	0	0	0	10	2	0	0	0	5	9	0	0	0	0	0	7	0	0
8d2eb1b576de0022562f623f50a24fb4_rep;size=389;	k__Bacteria	p__Proteobacteria	c__Gammaproteobacteria	o__Betaproteobacteriales	f__Burkholderiaceae	g__Duganella	g__Duganella	0	0	13	1	0	1	0	0	0	0	0	4	0	0	0	2	6	4	0	308	0	0	1	0	0	0	1	0	1	0	0	1	0	0	0	0	0	0	2	0	0	0
2f69227a18330f58202ca9cb97814fed_rep;size=389;	k__Bacteria	p__Patescibacteria	c__Saccharimonadia	o__Saccharimonadales	o__Saccharimonadales	o__Saccharimonadales	o__Saccharimonadales	0	15	1	1	0	0	1	5	0	0	0	4	0	0	0	0	2	2	0	0	0	7	5	6	0	5	2	0	11	1	7	8	0	0	11	11	1	0	7	0	0	3
84b7f07e8387fb3835f2b3d5872c0afa_rep;size=389;	Unassigned	Unassigned	Unassigned	Unassigned	Unassigned	Unassigned	Unassigned	6	0	5	0	0	0	2	6	0	1	0	1	0	0	0	0	0	1	0	0	0	8	0	0	0	8	3	5	0	0	1	0	1	0	19	2	13	0	0	1	1	8
9ccfdec6a429eb637e74b0e5e11c1c85_rep;size=389;	k__Bacteria	p__Proteobacteria	c__Alphaproteobacteria	o__Sphingomonadales	f__Sphingomonadaceae	g__Sphingomonas	Ambiguous_taxa	0	0	0	1	0	36	0	0	1	6	66	0	0	0	30	0	0	0	18	0	3	0	0	0	0	0	0	0	0	0	0	0	0	0	0	0	0	0	0	4	0	0
d798e8c42fcdc681a52fe42eedb1635c_rep;size=388;	k__Bacteria	p__Proteobacteria	c__Gammaproteobacteria	o__Betaproteobacteriales	f__Burkholderiaceae	g__Massilia	Ambiguous_taxa	1	0	0	0	1	0	0	1	0	0	0	0	0	2	0	0	105	0	3	0	5	0	0	1	4	0	0	2	0	0	0	0	4	0	0	0	4	2	39	12	4	8
16e1d9dade6c0443fc73246163bff500_rep;size=388;	k__Bacteria	p__Actinobacteria	c__Actinobacteria	o__Corynebacteriales	f__Mycobacteriaceae	g__Mycobacterium	g__Mycobacterium	0	0	0	0	0	0	0	0	0	0	0	0	0	0	0	0	0	0	0	2	0	0	0	0	0	0	0	3	0	21	1	1	0	6	0	1	0	0	32	0	0	0
4e7bfeee2287d857906c8abf35fb0c8f_rep;size=384;	Unassigned	Unassigned	Unassigned	Unassigned	Unassigned	Unassigned	Unassigned	0	332	0	0	0	0	0	0	0	0	0	0	0	0	0	0	0	0	0	1	0	0	0	0	0	0	0	0	7	0	0	0	0	0	0	0	0	0	0	0	0	0
2b74e2230dada3fc3c93f78c9721fa79_rep;size=382;	k__Bacteria	p__Proteobacteria	c__Alphaproteobacteria	o__Rhizobiales	f__Beijerinckiaceae	g__Methylobacterium	g__Methylobacterium	0	0	0	0	0	0	0	0	0	0	0	0	0	3	15	11	0	0	0	0	0	0	0	0	0	0	0	3	0	0	1	0	0	0	0	0	0	0	0	1	0	0
366a275b049ba6d95dde906e1bd5eff0_rep;size=382;	Unassigned	Unassigned	Unassigned	Unassigned	Unassigned	Unassigned	Unassigned	0	0	0	0	0	49	0	0	0	0	22	0	0	0	44	3	0	0	40	0	6	0	1	0	0	0	0	1	1	0	0	0	0	3	0	2	1	0	0	2	0	0
a877df7c09f773cc92a654a2c74498f9_rep;size=380;	k__Bacteria	p__Proteobacteria	c__Alphaproteobacteria	o__Caulobacterales	f__Caulobacteraceae	g__Brevundimonas	g__Brevundimonas	0	4	0	0	0	1	0	0	0	0	1	0	0	0	0	0	4	0	0	0	1	0	0	0	0	0	0	0	49	0	1	0	2	0	0	3	1	0	0	0	0	0
9ce7be6715fc7e59a42459149fa81804_rep;size=378;	k__Bacteria	p__Proteobacteria	c__Alphaproteobacteria	o__Sphingomonadales	f__Sphingomonadaceae	g__Sphingomonas	Ambiguous_taxa	0	2	3	0	0	2	0	0	0	0	2	2	23	0	0	0	0	0	0	2	0	0	1	1	0	0	0	0	1	5	0	0	0	4	0	2	1	0	0	0	21	0
1dc01b039e0786b375c36e5fe599c3cb_rep;size=378;	k__Bacteria	p__Deinococcus-Thermus	c__Deinococci	o__Deinococcales	f__Deinococcaceae	g__Deinococcus	s__uncultured bacterium	6	0	1	0	11	0	0	0	0	0	0	0	0	3	0	5	0	12	0	0	0	0	0	0	13	0	5	4	0	0	0	0	7	0	0	0	9	0	0	1	0	3
9d02880e286eca0e79cb01d076090a77_rep;size=378;	Unassigned	Unassigned	Unassigned	Unassigned	Unassigned	Unassigned	Unassigned	19	0	0	3	0	0	1	0	1	0	1	0	0	0	0	2	0	0	1	0	5	0	2	0	3	0	0	6	1	0	2	0	4	0	1	0	10	0	0	7	1	0
a54544f3ff023b96447ca472130f8c5d_rep;size=378;	Unassigned	Unassigned	Unassigned	Unassigned	Unassigned	Unassigned	Unassigned	5	0	5	0	0	0	1	3	0	0	0	1	0	0	0	0	0	5	0	0	0	8	0	0	3	10	2	3	1	0	0	0	0	0	13	6	12	0	0	1	1	17
7cad74fc4ad5b6abefe8228ec5b169fb_rep;size=378;	Unassigned	Unassigned	Unassigned	Unassigned	Unassigned	Unassigned	Unassigned	1	0	0	0	0	1	0	0	0	0	3	0	0	3	0	12	0	0	2	0	2	0	1	0	4	7	0	7	2	0	0	0	6	0	1	2	10	0	0	10	0	0
3e753d0a95ce45d3fad963231df9dad9_rep;size=377;	k__Bacteria	p__Proteobacteria	c__Alphaproteobacteria	o__Caulobacterales	f__Caulobacteraceae	g__Brevundimonas	g__Brevundimonas	0	3	0	4	0	2	0	0	11	0	1	0	0	0	0	0	8	0	4	2	26	0	1	1	2	0	0	6	4	1	2	0	3	0	0	3	0	0	1	0	4	0
74c15aea5d51cae322601f69fedfe808_rep;size=376;	k__Bacteria	p__Proteobacteria	c__Alphaproteobacteria	o__Sphingomonadales	f__Sphingomonadaceae	g__Sphingomonas	Ambiguous_taxa	0	0	0	0	0	10	0	0	0	0	3	0	0	0	289	0	0	0	5	0	0	0	1	0	0	0	0	0	0	0	0	0	0	1	0	0	0	0	0	0	0	0
1df6a015719d0a2d6ee02bd4f41f1296_rep;size=376;	k__Bacteria	p__Proteobacteria	c__Alphaproteobacteria	o__Caulobacterales	f__Caulobacteraceae	g__Brevundimonas	g__Brevundimonas	0	0	0	4	0	59	0	0	3	0	6	0	0	0	14	1	0	0	12	0	5	0	1	0	0	0	0	0	5	0	0	0	0	2	0	1	1	0	0	0	0	0
1ad71f6548a2646b0fb807e4a14b4801_rep;size=375;	k__Bacteria	p__Proteobacteria	c__Alphaproteobacteria	o__Rhizobiales	f__Devosiaceae	g__Devosia	g__Devosia	0	35	0	0	0	0	0	0	0	0	1	0	0	0	0	0	5	0	0	12	0	19	0	0	6	0	0	0	23	0	5	3	5	0	0	1	2	0	1	0	0	1
3c1e46d65938973ee7cf0cf666d8127f_rep;size=375;	k__Bacteria	p__Proteobacteria	c__Alphaproteobacteria	o__Sphingomonadales	f__Sphingomonadaceae	g__Novosphingobium	g__Novosphingobium	4	0	0	1	0	2	0	0	0	0	3	0	0	0	0	0	0	0	2	0	289	0	0	1	2	0	0	1	0	0	0	0	0	0	0	1	1	0	0	0	0	0
243b8d5050aa341957e5dad959eee754_rep;size=374;	Unassigned	Unassigned	Unassigned	Unassigned	Unassigned	Unassigned	Unassigned	0	0	0	0	0	0	0	0	0	0	0	0	0	0	0	0	0	0	0	0	0	0	0	0	0	0	0	0	0	3	0	0	0	0	0	0	0	0	0	0	0	0
9c900a59941950d0c92dfdeb8af8a0a9_rep;size=373;	k__Bacteria	p__Proteobacteria	c__Gammaproteobacteria	o__Betaproteobacteriales	f__Burkholderiaceae	g__Massilia	g__Massilia	0	0	0	0	0	0	0	0	87	1	0	0	0	0	0	0	0	0	0	0	0	0	0	0	0	0	0	1	0	0	0	1	0	0	0	0	2	0	2	0	0	0
283be7225e0ecdd411525948112368a2_rep;size=373;	k__Bacteria	p__Proteobacteria	c__Alphaproteobacteria	o__Sphingomonadales	f__Sphingomonadaceae	g__Sphingobium	g__Sphingobium	8	0	0	0	0	35	1	0	0	0	1	0	0	3	0	1	67	0	0	2	3	0	2	59	0	0	0	2	20	0	1	0	0	0	3	0	0	0	0	3	1	0
f0c7648ba19e0e246a6fbc8fd575ab93_rep;size=373;	k__Bacteria	p__Actinobacteria	c__Actinobacteria	o__Micrococcales	f__Microbacteriaceae	g__Microbacterium	g__Microbacterium	1	0	1	1	1	0	0	0	0	0	1	30	19	4	0	0	3	9	0	0	0	1	0	2	0	0	0	0	1	13	3	1	0	45	6	2	2	0	24	2	5	0
ed03bd7149274558c55a54585bd4b031_rep;size=372;	k__Bacteria	p__Proteobacteria	c__Alphaproteobacteria	o__Sphingomonadales	f__Sphingomonadaceae	g__Sphingomonas	Ambiguous_taxa	1	0	1	19	0	19	0	0	0	0	5	0	3	0	0	4	3	0	10	0	3	0	2	1	0	0	0	0	0	0	2	2	7	0	0	0	0	0	0	3	2	0
29e900af5c6448f258f36015a255f76f_rep;size=371;	k__Bacteria	p__Actinobacteria	c__Actinobacteria	o__Micrococcales	f__Promicromonosporaceae	f__Promicromonosporaceae	f__Promicromonosporaceae	12	0	0	10	0	0	2	1	0	0	0	1	0	2	0	1	5	6	0	0	0	0	27	1	1	2	0	2	2	0	7	0	0	2	2	1	1	4	1	1	10	0
7f57eb6dc059a746eaa41d7eb8033fdb_rep;size=371;	k__Bacteria	p__Proteobacteria	c__Alphaproteobacteria	o__Sphingomonadales	f__Sphingomonadaceae	g__Sphingomonas	Ambiguous_taxa	0	0	0	0	0	5	0	1	0	6	111	0	0	0	36	1	0	0	2	1	3	0	0	0	0	0	0	1	0	0	0	0	0	0	0	0	2	0	0	2	0	0
c55037703fa1439d07c57936f2cf0933_rep;size=370;	k__Bacteria	p__Proteobacteria	c__Alphaproteobacteria	o__Caulobacterales	f__Caulobacteraceae	g__Brevundimonas	g__Brevundimonas	1	1	0	1	0	9	0	0	0	0	0	0	0	0	0	0	92	0	0	0	12	1	0	7	1	0	0	5	27	0	1	5	0	0	0	17	0	0	4	0	0	0
9646eeab71619398e17edf8ab91bcca0_rep;size=368;	Unassigned	Unassigned	Unassigned	Unassigned	Unassigned	Unassigned	Unassigned	0	0	0	0	4	0	1	0	0	4	0	0	0	0	0	8	0	0	0	0	0	0	0	0	20	0	0	123	0	0	0	0	1	0	3	1	1	0	0	1	0	0
6965df91b2c70fab0a338929d3dd281d_rep;size=368;	k__Bacteria	p__Deinococcus-Thermus	c__Deinococci	o__Deinococcales	f__Deinococcaceae	g__Deinococcus	s__uncultured bacterium	4	0	0	0	10	0	1	0	0	6	0	0	0	0	0	0	0	0	0	0	0	0	1	0	4	0	0	9	2	1	0	0	8	0	0	0	7	0	0	0	0	0
a153b58dbbd53d9983b0a289ef979364_rep;size=368;	Unassigned	Unassigned	Unassigned	Unassigned	Unassigned	Unassigned	Unassigned	0	0	0	0	16	0	0	0	0	2	0	1	0	14	0	2	0	0	0	0	0	0	0	0	8	0	3	19	2	0	0	0	9	0	1	0	4	0	1	1	0	1
89b5a82f3a58a2fdea1dec114c0f7cc9_rep;size=368;	k__Bacteria	p__Actinobacteria	c__Actinobacteria	o__Pseudonocardiales	f__Pseudonocardiaceae	g__Pseudonocardia	s__uncultured bacterium	1	0	0	0	41	0	0	0	1	2	0	5	0	6	0	1	0	12	0	0	0	0	1	0	2	0	0	0	1	2	0	0	2	2	0	0	1	3	16	0	0	1
cac801a418d7fec65331b374a8a1f73b_rep;size=367;	k__Bacteria	p__Proteobacteria	c__Alphaproteobacteria	o__Rhizobiales	f__Rhizobiaceae	g__Allorhizobium-Neorhizobium-Pararhizobium-Rhizobium	g__Allorhizobium-Neorhizobium-Pararhizobium-Rhizobium	2	0	14	0	2	0	1	0	0	0	0	0	92	2	0	0	8	1	0	0	0	0	2	15	2	0	0	0	0	0	18	8	0	0	0	3	0	2	0	2	8	1
f4de8ed9a80ff9809c25c772cffd13ad_rep;size=367;	k__Bacteria	p__Patescibacteria	c__Saccharimonadia	o__Saccharimonadales	o__Saccharimonadales	o__Saccharimonadales	o__Saccharimonadales	0	9	0	1	1	0	0	0	0	0	0	0	0	0	0	0	0	0	0	12	0	0	3	0	0	0	0	2	0	2	0	1	1	7	0	0	0	0	1	0	1	0
c49ffed1c129b3acdf0b47abf35e17bd_rep;size=366;	k__Bacteria	p__Actinobacteria	c__Actinobacteria	o__Micrococcales	f__Micrococcaceae	f__Micrococcaceae	f__Micrococcaceae	1	0	0	0	0	0	11	1	0	0	0	0	0	10	0	56	0	1	0	0	0	0	1	0	1	1	1	3	0	0	1	0	1	0	2	3	2	0	0	12	10	4
cddff378df02d2d44603e6050faf7784_rep;size=366;	k__Bacteria	p__Proteobacteria	c__Alphaproteobacteria	o__Sphingomonadales	f__Sphingomonadaceae	g__Sphingomonas	Ambiguous_taxa	2	0	0	0	0	0	0	0	0	0	2	0	0	0	1	1	0	0	1	0	4	0	0	0	2	0	0	7	1	0	0	0	3	0	2	3	12	0	0	0	0	0
e0a4d5ee2c4555aaa6eff0615980b1f5_rep;size=366;	k__Bacteria	p__Proteobacteria	c__Alphaproteobacteria	o__Sphingomonadales	f__Sphingomonadaceae	g__Sphingomonas	g__Sphingomonas	2	4	0	2	0	3	0	0	2	0	6	0	0	0	1	0	19	0	2	0	78	0	0	0	6	0	0	9	4	0	1	0	7	0	0	3	3	1	0	1	0	0
974e8e430742681ea09ebe0550a015e4_rep;size=365;	k__Bacteria	p__Bacteroidetes	c__Bacteroidia	o__Cytophagales	f__Hymenobacteraceae	g__Hymenobacter	s__Siccationidurans metalli	0	0	0	0	0	0	0	0	0	0	0	0	0	0	0	0	0	0	0	0	0	0	0	0	0	0	0	0	0	0	0	0	0	0	0	0	0	0	0	0	0	0
40e211e7a271d2ef58695a1ab3fc0f39_rep;size=364;	k__Bacteria	p__Firmicutes	c__Clostridia	o__Clostridiales	f__Clostridiaceae 1	g__Clostridium sensu stricto 3	g__Clostridium sensu stricto 3	1	2	0	5	1	1	1	0	9	0	1	0	0	3	0	0	0	0	0	36	0	0	2	12	0	0	0	0	0	11	1	4	2	20	0	0	1	0	0	0	0	0
eea97cfd71195a4d3ab3b6c09619a17b_rep;size=364;	k__Bacteria	p__Proteobacteria	c__Alphaproteobacteria	o__Rhodobacterales	f__Rhodobacteraceae	g__Paracoccus	g__Paracoccus	4	1	11	1	0	3	2	8	2	0	0	0	0	3	0	16	5	2	0	0	0	18	0	2	1	1	16	1	2	0	0	4	0	0	2	4	4	0	1	26	1	5
a77e119c5ddd52cce0f8bf0b48364b98_rep;size=364;	Unassigned	Unassigned	Unassigned	Unassigned	Unassigned	Unassigned	Unassigned	11	0	0	21	0	2	0	0	0	0	0	0	1	0	0	0	0	0	0	0	0	0	5	11	1	0	0	2	1	0	18	1	3	0	2	1	4	0	0	2	3	0
06da38593ed7879dbc872ed6428d9e08_rep;size=364;	k__Bacteria	p__Actinobacteria	c__Actinobacteria	o__Micrococcales	f__Brevibacteriaceae	g__Brevibacterium	Ambiguous_taxa	1	0	2	1	0	0	2	5	0	0	0	18	0	8	0	7	0	5	0	0	0	17	1	0	0	4	26	4	0	2	2	0	0	0	9	1	4	7	0	2	5	10
3404838b342d37851137de06d91d89fb_rep;size=364;	Unassigned	Unassigned	Unassigned	Unassigned	Unassigned	Unassigned	Unassigned	4	0	0	0	0	4	0	0	0	0	7	0	0	0	4	6	1	1	3	0	2	0	1	0	2	0	0	8	2	0	0	0	0	1	0	2	1	0	0	13	0	0
e2a86e15d3dfc75876a727d49c682076_rep;size=362;	k__Bacteria	p__Deinococcus-Thermus	c__Deinococci	o__Deinococcales	f__Deinococcaceae	g__Deinococcus	s__uncultured bacterium	3	0	0	0	3	0	3	0	1	3	0	0	0	5	0	0	0	0	0	0	0	1	0	0	3	0	0	3	5	2	0	0	3	0	0	1	5	0	2	3	0	6
0f085a3ec0609ca69faeb60c4b87a519_rep;size=362;	k__Bacteria	p__Firmicutes	c__Clostridia	o__Clostridiales	f__Clostridiaceae 1	g__Proteiniclasticum	g__Proteiniclasticum	0	0	4	1	0	0	26	1	0	0	0	3	0	4	0	0	0	0	0	126	0	64	2	0	0	0	3	0	0	0	28	12	0	0	0	1	0	0	0	0	2	7
786019a8ba11881830bb223b99bf6704_rep;size=362;	k__Bacteria	p__Proteobacteria	c__Alphaproteobacteria	o__Sphingomonadales	f__Sphingomonadaceae	g__Novosphingobium	g__Novosphingobium	55	0	0	3	1	0	0	1	1	0	6	0	0	1	0	0	2	0	0	0	8	0	0	0	1	0	0	5	3	1	1	1	9	0	3	0	4	0	1	1	0	0
b19a5344ff83029e870c1a9b2e16a62e_rep;size=361;	k__Bacteria	p__Proteobacteria	c__Gammaproteobacteria	o__Betaproteobacteriales	f__Burkholderiaceae	g__Massilia	g__Massilia	0	0	0	1	0	0	0	1	173	0	0	0	0	0	0	0	0	0	0	0	0	0	0	0	0	0	0	0	0	2	0	0	1	0	0	0	0	0	2	6	0	1
bee6e520631d367d7928452707d9998c_rep;size=361;	k__Bacteria	p__Actinobacteria	c__Actinobacteria	o__Micrococcales	f__Micrococcaceae	g__Arthrobacter	g__Arthrobacter	2	0	0	0	0	1	6	6	0	0	0	8	6	10	0	2	1	10	0	0	0	0	7	5	0	17	7	1	3	0	9	0	3	4	11	4	0	4	3	0	10	2
c8de7d8c24c28c92cc70c3f8312e06b1_rep;size=361;	k__Bacteria	p__Proteobacteria	c__Alphaproteobacteria	o__Rhizobiales	f__Xanthobacteraceae	g__Xanthobacter	Ambiguous_taxa	0	119	0	0	0	0	0	0	0	0	0	0	0	0	0	0	0	0	0	0	0	0	0	0	0	0	0	0	1	0	0	0	0	0	0	0	0	0	0	0	0	0
704e0b7f8bff1c15d42c2f0d936a64d6_rep;size=361;	k__Bacteria	p__Actinobacteria	c__Actinobacteria	o__Micrococcales	o__Micrococcales	o__Micrococcales	o__Micrococcales	8	5	3	1	0	3	1	1	0	0	8	9	0	1	0	1	4	5	1	1	2	3	1	0	14	1	0	3	13	0	3	1	2	2	3	1	1	0	40	4	2	1
6b322d5cb472685e020387405ebfaa2c_rep;size=360;	k__Bacteria	p__Proteobacteria	c__Gammaproteobacteria	o__Betaproteobacteriales	f__Burkholderiaceae	f__Burkholderiaceae	f__Burkholderiaceae	0	0	0	0	0	0	0	0	0	0	0	0	0	0	0	0	0	0	0	2	0	0	0	0	0	0	0	0	0	0	0	0	0	0	0	1	0	0	0	0	0	0
6dafdb4d6e30ed313cf355544ab2da2a_rep;size=360;	k__Bacteria	p__Proteobacteria	c__Alphaproteobacteria	o__Caulobacterales	f__Caulobacteraceae	g__Brevundimonas	g__Brevundimonas	0	0	0	3	0	12	0	0	1	0	14	0	0	0	7	0	1	0	1	0	4	0	0	0	0	0	0	0	2	1	0	1	1	0	0	0	0	0	0	0	2	0
093034177e4528242f4148602e046194_rep;size=359;	k__Bacteria	p__Cyanobacteria	c__Oxyphotobacteria	o__Nostocales	f__Chroococcidiopsaceae	g__uncultured	s__uncultured bacterium	2	0	0	8	1	0	0	0	4	0	0	0	0	0	3	0	0	6	0	0	6	0	2	0	3	0	0	5	0	1	0	0	22	0	0	0	12	0	0	4	0	9
9e1427b91a68218ce829d5ae36ef895d_rep;size=358;	k__Bacteria	p__Proteobacteria	c__Alphaproteobacteria	o__Acetobacterales	f__Acetobacteraceae	f__Acetobacteraceae	f__Acetobacteraceae	1	0	0	0	0	0	1	0	0	1	0	1	0	13	0	10	0	2	0	0	0	0	1	0	3	0	0	0	80	0	0	0	2	0	0	0	2	0	0	9	0	8
a1c0e592c8b82eb065f5f6f9c859e006_rep;size=358;	k__Bacteria	p__Firmicutes	c__Clostridia	o__Clostridiales	f__Eubacteriaceae	g__Acetobacterium	g__Acetobacterium	0	0	0	0	0	0	0	0	0	0	0	0	0	0	0	0	0	0	0	7	0	4	0	0	0	0	0	0	0	0	5	0	0	0	0	0	0	0	0	0	0	0
88279be4d18f42c576b1f35b2753dfae_rep;size=358;	k__Bacteria	p__Actinobacteria	c__Actinobacteria	o__Micrococcales	f__Micrococcaceae	g__Kocuria	g__Kocuria	3	0	0	1	0	0	7	3	0	0	0	5	23	6	0	6	0	14	0	0	1	0	4	5	0	2	16	0	3	0	11	0	0	0	7	3	0	2	1	1	24	9
ff7b0274ab853dba2b9d77428ecd4a1a_rep;size=358;	Unassigned	Unassigned	Unassigned	Unassigned	Unassigned	Unassigned	Unassigned	3	0	0	1	0	7	1	0	3	3	1	0	0	0	21	0	0	0	11	0	2	0	0	0	1	0	0	0	15	0	0	0	1	4	0	2	1	0	0	0	0	0
57d97d99a787981a2ba6b51752cd3828_rep;size=356;	k__Bacteria	p__Proteobacteria	c__Alphaproteobacteria	o__Rhizobiales	f__Rhizobiaceae	g__Allorhizobium-Neorhizobium-Pararhizobium-Rhizobium	g__Allorhizobium-Neorhizobium-Pararhizobium-Rhizobium	0	9	0	12	0	4	0	0	0	0	2	1	0	0	0	4	39	1	0	22	1	0	2	5	0	0	0	0	6	0	0	1	0	0	6	0	0	0	3	1	0	0
d053eaeb26bb50e6e647371b676da8f3_rep;size=356;	k__Bacteria	p__Actinobacteria	c__Actinobacteria	o__Micrococcales	f__Micrococcaceae	g__Kocuria	g__Kocuria	6	0	1	0	1	0	5	1	0	0	2	1	1	2	0	3	0	4	0	0	1	1	0	0	4	7	4	7	0	3	0	0	3	0	8	4	3	2	0	0	3	1
b73a775dda81449b9aff64de72f16043_rep;size=356;	k__Bacteria	p__Proteobacteria	c__Gammaproteobacteria	o__Betaproteobacteriales	f__Burkholderiaceae	f__Burkholderiaceae	f__Burkholderiaceae	0	0	0	0	0	0	0	0	0	0	0	0	0	0	0	0	0	0	0	0	0	0	0	0	0	0	0	0	0	0	0	0	1	0	0	0	0	0	0	0	0	0
a0b66e38bf9d2be2e3284e15c2061335_rep;size=356;	k__Bacteria	p__Actinobacteria	c__Actinobacteria	o__Micrococcales	f__Micrococcaceae	f__Micrococcaceae	f__Micrococcaceae	0	0	14	0	0	0	1	13	0	0	0	10	1	1	0	0	1	4	0	0	0	57	2	2	0	0	36	0	0	3	3	0	0	1	0	4	0	0	1	6	6	15
15c4964ebd9b1c6b72902832bff089de_rep;size=356;	k__Bacteria	p__Actinobacteria	c__Actinobacteria	o__Micrococcales	f__Micrococcaceae	f__Micrococcaceae	f__Micrococcaceae	0	0	1	0	0	0	1	0	0	0	0	1	0	1	0	4	0	3	0	0	0	1	0	0	1	6	2	8	2	0	0	0	2	0	6	0	4	1	0	0	4	0
3763590340bb3112debe384495d10ff9_rep;size=356;	k__Bacteria	p__Actinobacteria	c__Actinobacteria	o__Micrococcales	f__Intrasporangiaceae	g__Ornithinimicrobium	Ambiguous_taxa	0	0	2	0	0	0	0	9	0	0	0	12	0	0	0	0	0	4	0	0	0	11	2	0	0	8	5	22	1	0	0	0	1	0	29	1	6	0	0	0	1	13
9a2d903a1e1a0e9752beca9465118682_rep;size=355;	k__Bacteria	p__Actinobacteria	c__Actinobacteria	o__Micrococcales	f__Microbacteriaceae	f__Microbacteriaceae	f__Microbacteriaceae	0	0	1	0	1	0	3	5	0	0	0	19	5	14	0	3	0	17	0	0	0	0	3	0	0	48	1	0	4	0	6	0	0	2	23	4	0	16	1	1	8	3
609ce4254cfdf340770335d9313ed456_rep;size=355;	k__Bacteria	p__Proteobacteria	c__Alphaproteobacteria	o__Sphingomonadales	f__Sphingomonadaceae	g__Sphingomonas	g__Sphingomonas	2	0	0	2	0	35	0	0	150	0	3	0	0	0	0	0	0	0	0	2	5	0	0	0	0	0	0	1	0	0	0	0	4	0	0	0	0	0	0	0	0	0
ecea374488ef348934e0b778c3f95e6b_rep;size=355;	Unassigned	Unassigned	Unassigned	Unassigned	Unassigned	Unassigned	Unassigned	4	3	1	8	0	10	0	1	6	0	3	0	0	0	0	0	7	0	26	1	39	1	2	0	1	0	0	7	2	0	0	0	6	2	1	8	3	0	1	0	2	0
50f7602c4dcd62b5636b8d1b4c5f3c97_rep;size=355;	k__Bacteria	p__Proteobacteria	c__Deltaproteobacteria	o__Myxococcales	f__P3OB-42	g__uncultured bacterium	s__uncultured bacterium	1	0	0	3	3	0	1	0	6	0	0	0	0	0	0	0	0	0	0	0	0	0	66	0	1	0	0	2	0	0	5	1	11	0	0	2	2	0	0	0	0	0
da04906afc0242dfedda30d3e9706d30_rep;size=354;	k__Bacteria	p__Proteobacteria	c__Alphaproteobacteria	o__Rhizobiales	f__Beijerinckiaceae	g__1174-901-12	s__uncultured bacterium	12	0	0	1	2	0	4	0	3	0	0	0	0	3	2	0	0	6	0	0	0	0	0	0	14	0	0	0	1	0	0	0	4	0	0	0	0	0	1	4	1	1
b6044783bd5d30913f796c491ae608f2_rep;size=354;	k__Bacteria	p__Proteobacteria	c__Alphaproteobacteria	o__Acetobacterales	f__Acetobacteraceae	g__Rhodovarius	Ambiguous_taxa	0	9	0	1	0	0	0	0	0	0	0	0	0	0	6	0	0	0	0	60	1	2	0	0	0	2	0	0	0	0	1	0	0	0	0	0	0	0	0	0	0	0
64d9587b6a51107b3c64ecd0a1f8b8f6_rep;size=352;	k__Bacteria	p__Actinobacteria	c__Actinobacteria	o__Micrococcales	f__Micrococcaceae	f__Micrococcaceae	f__Micrococcaceae	0	0	3	0	0	0	2	4	0	0	0	2	0	2	0	1	0	4	0	0	0	10	0	0	4	19	6	9	1	0	0	0	3	0	16	3	6	1	0	2	0	36
bcfe991e38016f34742bff17af73ff3e_rep;size=351;	k__Bacteria	p__Proteobacteria	c__Alphaproteobacteria	o__Acetobacterales	f__Acetobacteraceae	g__Roseomonas	g__Roseomonas	1	0	1	53	0	1	0	0	0	0	3	0	0	5	1	2	0	1	0	0	0	0	0	0	4	0	0	0	0	2	0	0	2	0	0	0	0	0	0	4	1	7
94ce4d2a16b5206ffdedbee5c45ec866_rep;size=350;	k__Bacteria	p__Actinobacteria	c__Actinobacteria	o__Propionibacteriales	f__Nocardioidaceae	g__Nocardioides	g__Nocardioides	1	0	2	0	9	0	10	0	0	1	0	4	0	1	0	1	0	3	0	0	0	2	0	0	0	32	1	7	12	0	2	1	2	6	9	5	6	0	12	1	0	3
dcb8a5bcab19c4002a3526ea5b624efb_rep;size=350;	Unassigned	Unassigned	Unassigned	Unassigned	Unassigned	Unassigned	Unassigned	0	0	0	0	0	1	0	0	0	1	6	0	0	0	0	1	1	0	47	0	19	0	0	0	1	0	0	2	0	0	0	0	10	0	0	0	6	0	1	0	0	0
0f91c2ae38ebc30f780c7600ea389093_rep;size=350;	Unassigned	Unassigned	Unassigned	Unassigned	Unassigned	Unassigned	Unassigned	16	2	0	5	0	1	0	0	0	0	0	0	1	0	0	0	12	0	0	0	2	0	0	5	1	1	0	2	7	0	1	1	1	0	1	3	2	0	0	3	0	2
940724e93984dc94a1a78a5cb8c375cb_rep;size=349;	k__Bacteria	p__Proteobacteria	c__Alphaproteobacteria	o__Sphingomonadales	f__Sphingomonadaceae	g__Sphingomonas	g__Sphingomonas	9	0	0	0	0	1	0	0	6	0	46	0	0	0	0	0	1	0	2	0	35	0	0	0	2	0	0	4	0	0	0	0	3	0	0	2	3	0	0	0	0	0
b6c3d858b1f3270892526b0db60f6ef0_rep;size=349;	k__Bacteria	p__Proteobacteria	c__Alphaproteobacteria	o__Rhizobiales	f__Xanthobacteraceae	g__Ancylobacter	Ambiguous_taxa	0	0	0	0	0	0	0	0	0	0	0	0	0	0	0	0	0	0	0	0	0	0	0	0	0	0	0	0	0	0	0	0	0	0	0	0	0	0	0	0	0	0
3b8028d264937cafcd3bb43cef4edf8b_rep;size=349;	Unassigned	Unassigned	Unassigned	Unassigned	Unassigned	Unassigned	Unassigned	2	0	0	0	0	0	0	0	0	0	6	0	0	0	0	13	0	0	2	0	0	0	1	0	2	1	0	10	0	1	0	0	5	0	2	2	5	0	0	8	2	0
b035790abc130e88e521197b9e2bcf29_rep;size=348;	k__Bacteria	p__Cyanobacteria	c__Oxyphotobacteria	o__Nostocales	f__Chroococcidiopsaceae	g__uncultured	s__uncultured bacterium	2	0	0	0	0	0	0	1	0	5	0	0	0	1	0	0	0	2	0	0	0	0	0	0	2	0	2	31	1	0	0	0	1	0	0	0	3	0	1	0	0	0
ee6cf99492c450cb69c77c2317e752c3_rep;size=348;	k__Bacteria	p__Proteobacteria	c__Gammaproteobacteria	o__Pseudomonadales	f__Moraxellaceae	g__Acinetobacter	s__uncultured bacterium	0	0	0	0	0	0	0	0	6	0	0	0	0	2	0	2	0	0	0	1	0	0	0	0	0	0	0	0	0	0	0	3	2	2	0	3	0	0	0	0	0	0
89e85ab7434cb1af427d77d56c6247f3_rep;size=348;	k__Bacteria	p__Actinobacteria	c__Actinobacteria	o__Micrococcales	f__Micrococcaceae	f__Micrococcaceae	f__Micrococcaceae	0	0	17	0	0	0	26	4	0	0	0	7	5	2	0	0	6	3	0	0	0	15	0	3	0	0	64	1	0	11	5	5	0	4	0	0	1	0	1	1	56	4
5dafb581d8490ee5adef0576d7afbb77_rep;size=348;	Unassigned	Unassigned	Unassigned	Unassigned	Unassigned	Unassigned	Unassigned	10	0	3	2	0	1	0	0	0	0	1	1	14	0	0	1	21	0	0	0	1	2	0	13	2	1	4	3	13	4	3	0	4	0	2	11	4	0	2	2	3	3
4681e9ddbb5be291ac89b614d5dfb2d0_rep;size=348;	k__Bacteria	p__Bacteroidetes	c__Bacteroidia	o__Cytophagales	f__Hymenobacteraceae	g__Hymenobacter	s__uncultured bacterium	0	0	0	7	0	0	0	0	57	1	0	0	0	0	0	0	0	0	0	0	0	0	0	0	0	0	0	0	0	1	0	0	12	0	0	2	0	0	0	0	0	0
a01aabb68fa5d5e576091c0b9815748f_rep;size=348;	Unassigned	Unassigned	Unassigned	Unassigned	Unassigned	Unassigned	Unassigned	0	0	1	0	0	0	0	0	2	0	9	0	0	0	0	1	1	0	147	0	3	0	0	0	0	0	0	0	0	0	0	1	7	0	0	0	0	0	0	1	0	0
ca4ecf26cd73c3d39a921f5594f94085_rep;size=347;	Unassigned	Unassigned	Unassigned	Unassigned	Unassigned	Unassigned	Unassigned	4	0	0	0	0	1	1	4	0	0	6	0	0	0	0	5	0	1	1	0	5	1	4	2	1	0	2	11	8	0	0	1	4	0	0	3	3	0	0	7	1	5
950c8a715a208915c94db13a47364cb4_rep;size=346;	k__Bacteria	p__Proteobacteria	c__Alphaproteobacteria	o__Rhodobacterales	f__Rhodobacteraceae	g__uncultured	s__uncultured bacterium	5	1	0	0	0	0	0	1	0	0	0	0	0	0	0	0	0	1	0	0	1	0	2	0	5	1	0	19	0	0	0	0	0	0	5	3	18	0	0	3	1	4
4eefffe56db5606b24fd08a89a32fad2_rep;size=346;	Unassigned	Unassigned	Unassigned	Unassigned	Unassigned	Unassigned	Unassigned	20	0	0	0	0	0	4	7	0	0	0	5	0	15	0	44	0	5	0	0	0	1	5	1	2	2	2	1	0	0	16	0	6	2	1	0	0	0	0	12	14	4
253a7230f2465f29a4f710bbbf490c22_rep;size=345;	k__Bacteria	p__Firmicutes	c__Bacilli	o__Bacillales	f__Bacillaceae	g__Bacillus	s__Bacillus circulans	2	0	1	2	6	0	0	8	0	2	0	0	0	1	0	0	0	1	0	0	2	0	1	0	0	0	0	5	2	0	0	0	1	3	0	0	0	0	0	0	0	0
903069afe43bb0e425cc74ca38633d39_rep;size=345;	k__Bacteria	p__Proteobacteria	c__Alphaproteobacteria	o__Sphingomonadales	f__Sphingomonadaceae	g__Sphingomonas	g__Sphingomonas	1	0	0	0	0	6	0	0	1	0	33	0	0	0	2	1	0	0	27	0	17	0	0	0	0	0	0	6	1	0	0	1	2	1	0	0	4	0	0	1	0	0
aba8c17e313c37c938998554292445ba_rep;size=344;	k__Bacteria	p__Proteobacteria	c__Gammaproteobacteria	o__Betaproteobacteriales	f__Burkholderiaceae	g__Janthinobacterium	g__Janthinobacterium	0	0	50	0	36	6	2	0	6	0	0	8	0	0	0	0	0	0	0	34	0	0	0	0	1	0	0	0	0	15	0	1	0	9	1	0	0	0	4	0	0	0
fe4a6732205b7d5561e19dd5387925ea_rep;size=344;	k__Bacteria	p__Actinobacteria	c__Actinobacteria	o__Micrococcales	f__Microbacteriaceae	f__Microbacteriaceae	f__Microbacteriaceae	5	0	0	2	1	0	0	0	0	0	0	0	0	5	0	4	0	5	0	0	1	0	3	0	0	2	1	8	0	0	0	0	2	0	0	4	3	2	1	0	7	3
be148707822d43eb30572f0a5c792beb_rep;size=344;	k__Bacteria	p__Actinobacteria	c__Actinobacteria	o__Micrococcales	f__Microbacteriaceae	g__Gulosibacter	s__Gulosibacter sp. 10	21	0	0	0	0	0	0	2	0	0	0	4	0	5	0	0	0	11	0	0	0	2	5	0	0	15	2	4	0	0	3	0	0	0	11	3	9	13	0	1	3	4
968458de811dee957cc6a0c1fc2d0c41_rep;size=343;	k__Bacteria	p__Proteobacteria	c__Alphaproteobacteria	o__Rhizobiales	f__Beijerinckiaceae	g__Methylobacterium	Ambiguous_taxa	0	0	0	0	0	12	0	0	0	2	105	0	0	0	6	0	0	0	19	0	3	0	0	0	2	0	0	0	0	0	0	0	0	1	0	0	0	0	0	1	0	0
9cff4475e8673257b4d1a6012cf4e439_rep;size=343;	k__Bacteria	p__Proteobacteria	c__Alphaproteobacteria	o__Rhizobiales	f__Xanthobacteraceae	g__Ancylobacter	Ambiguous_taxa	0	140	1	0	0	0	0	0	0	0	0	0	0	0	0	0	0	0	0	0	0	0	0	0	0	0	0	0	0	0	0	0	0	0	0	0	0	0	0	0	0	0
d62e3a2ec983a6eac1994e5766b29fbb_rep;size=342;	k__Bacteria	p__Actinobacteria	c__Actinobacteria	o__Pseudonocardiales	f__Pseudonocardiaceae	g__Actinomycetospora	Ambiguous_taxa	0	0	0	3	0	0	151	0	0	2	0	0	0	8	1	0	0	0	0	0	0	0	0	0	0	0	0	0	0	0	0	0	0	6	0	44	0	0	0	0	1	1
269a48ba78d495ced78ed6f1a7393c75_rep;size=341;	k__Bacteria	p__Proteobacteria	c__Alphaproteobacteria	o__Sphingomonadales	f__Sphingomonadaceae	g__Sphingomonas	Ambiguous_taxa	1	0	0	0	0	32	1	0	0	0	0	0	49	0	1	0	1	3	0	0	0	0	29	6	0	0	0	0	0	0	0	2	5	0	0	7	0	1	0	0	4	0
8279a9fbcc80b54b493c785ddfb903f5_rep;size=341;	Unassigned	Unassigned	Unassigned	Unassigned	Unassigned	Unassigned	Unassigned	0	0	0	0	0	0	0	0	0	0	0	0	0	0	0	0	0	0	0	0	0	0	0	0	0	0	0	0	0	0	0	0	0	0	0	0	0	0	0	0	0	0
26daff8d7f534ad304e163e1b5990b51_rep;size=340;	Unassigned	Unassigned	Unassigned	Unassigned	Unassigned	Unassigned	Unassigned	0	2	1	1	0	0	0	0	0	0	0	0	0	0	3	0	0	0	0	1	0	0	0	0	0	0	0	0	1	0	0	0	0	0	0	0	0	0	0	0	0	0
2b456e060dfc295ca653dfe059351fb5_rep;size=340;	k__Bacteria	p__Deinococcus-Thermus	c__Deinococci	o__Deinococcales	f__Deinococcaceae	g__Deinococcus	g__Deinococcus	10	0	0	0	0	0	0	1	1	1	0	0	0	3	0	8	0	1	0	0	0	0	0	0	6	0	0	18	0	5	0	0	15	0	0	0	2	0	0	9	0	2
9a286d0ed365bfffcb83fe5c980bddaa_rep;size=340;	k__Bacteria	p__Proteobacteria	c__Alphaproteobacteria	o__Sphingomonadales	f__Sphingomonadaceae	g__Sphingomonas	g__Sphingomonas	1	0	0	1	0	4	0	0	17	2	59	0	0	0	0	0	0	0	66	0	52	0	0	0	0	0	0	0	0	0	0	0	1	1	0	0	1	0	0	0	0	0
77bd9d30cc702830c807a887c944e2b2_rep;size=340;	k__Bacteria	p__Firmicutes	c__Bacilli	o__Bacillales	f__Family XII	g__Exiguobacterium	g__Exiguobacterium	0	4	21	1	0	1	0	19	0	0	0	20	0	0	0	1	0	5	0	0	1	16	0	10	0	1	49	0	3	0	3	1	0	0	2	5	1	4	1	1	12	19
799635e315c6b83ebf6cf69509eb59dd_rep;size=339;	k__Bacteria	p__Proteobacteria	c__Alphaproteobacteria	o__Acetobacterales	f__Acetobacteraceae	g__Craurococcus	s__uncultured bacterium	1	0	0	0	2	0	1	0	2	2	0	1	0	0	0	0	0	0	0	0	0	0	0	0	5	0	4	2	1	1	0	0	7	0	0	0	6	0	5	0	1	0
dbd5dc779e527fa3934e019dd1d9a355_rep;size=339;	Unassigned	Unassigned	Unassigned	Unassigned	Unassigned	Unassigned	Unassigned	0	2	1	16	0	0	0	0	0	0	0	0	0	0	0	0	0	0	0	0	0	15	1	1	0	0	0	0	0	0	0	4	0	0	0	0	0	0	0	1	0	0
54daa4b6baaa0b5ce42fbc217cf54a5c_rep;size=339;	Unassigned	Unassigned	Unassigned	Unassigned	Unassigned	Unassigned	Unassigned	6	3	0	0	1	0	0	1	0	0	0	0	0	0	0	0	91	0	0	0	0	1	2	8	0	0	0	1	20	0	1	2	0	0	1	1	3	0	1	0	0	0
184b72931f2065f52299bec724ae8686_rep;size=339;	k__Bacteria	p__Proteobacteria	c__Alphaproteobacteria	o__Sphingomonadales	f__Sphingomonadaceae	g__Sphingomonas	Ambiguous_taxa	0	0	0	0	0	0	0	0	0	0	23	0	0	0	0	0	0	0	3	0	2	0	0	0	0	0	0	0	0	1	0	0	2	0	0	22	0	0	0	0	0	0
d82a35e06bf8a910d24929a6637741bc_rep;size=339;	Unassigned	Unassigned	Unassigned	Unassigned	Unassigned	Unassigned	Unassigned	3	0	0	0	0	1	0	0	0	0	3	0	0	0	0	0	2	0	53	0	13	0	0	0	2	0	0	2	0	0	0	1	5	1	0	0	1	0	2	0	0	0
89dea176a178e28456785bc8d598579b_rep;size=338;	k__Bacteria	p__Proteobacteria	c__Gammaproteobacteria	o__Salinisphaerales	f__Solimonadaceae	g__Nevskia	s__uncultured bacterium	0	0	0	0	0	0	0	0	0	0	0	0	0	0	0	0	0	0	0	120	0	0	0	0	0	0	0	0	0	0	0	0	0	0	0	0	0	0	0	0	0	0
2f97492ef9c9571e2e76166dde9d64eb_rep;size=338;	k__Bacteria	p__Firmicutes	c__Bacilli	o__Bacillales	f__Family XI	g__Gemella	s__uncultured bacterium	0	0	0	0	0	0	0	0	0	0	0	0	0	0	0	0	0	0	0	0	0	0	0	0	0	0	0	0	0	0	0	0	0	0	0	0	0	0	0	0	0	0
e59174fec12e72d9f2cadb527eccb63a_rep;size=338;	Unassigned	Unassigned	Unassigned	Unassigned	Unassigned	Unassigned	Unassigned	1	0	4	0	0	0	0	7	0	0	0	12	0	5	0	3	0	3	0	0	0	8	3	1	0	6	20	6	5	1	3	0	1	1	8	0	2	5	0	2	9	14
a2786a682ad14e704ae96767d5b6fa8d_rep;size=338;	k__Bacteria	p__Proteobacteria	c__Alphaproteobacteria	o__Sphingomonadales	f__Sphingomonadaceae	g__Sphingomonas	g__Sphingomonas	9	1	0	1	0	0	0	0	2	4	2	0	0	0	0	1	1	0	1	2	2	0	0	0	2	0	1	6	1	0	0	1	2	1	3	6	8	1	0	3	0	0
ce520753fecda399e902cdce5de10a19_rep;size=337;	Unassigned	Unassigned	Unassigned	Unassigned	Unassigned	Unassigned	Unassigned	0	0	2	1	0	0	0	3	3	1	0	0	0	0	0	10	1	1	0	0	0	1	2	3	1	1	0	6	3	0	2	0	10	0	0	19	2	0	0	25	0	0
155cef4789976b10ee671bb241149e23_rep;size=337;	k__Bacteria	p__Firmicutes	c__Clostridia	o__Clostridiales	f__Clostridiaceae 1	g__Clostridium sensu stricto 8	s__uncultured bacterium	0	0	0	2	0	0	0	0	0	0	0	0	0	0	0	0	0	0	0	194	0	0	0	0	0	0	0	0	0	0	0	0	0	0	0	0	0	0	0	0	0	0
6221cbd2bb45b0417424afc7f3677e9e_rep;size=337;	k__Bacteria	p__Proteobacteria	c__Alphaproteobacteria	o__Rhodobacterales	f__Rhodobacteraceae	g__Paracoccus	g__Paracoccus	0	0	0	7	0	0	0	0	0	0	0	0	0	0	0	3	0	1	0	0	2	0	0	0	0	0	0	3	5	1	0	0	0	0	0	52	2	0	0	5	0	0
fdf8469e4c9bf7685eb65893d8179f02_rep;size=337;	k__Bacteria	p__Firmicutes	c__Bacilli	o__Bacillales	f__Planococcaceae	g__Planococcus	g__Planococcus	0	0	23	0	0	0	0	31	0	0	0	9	2	0	0	0	0	6	0	0	0	79	0	0	0	0	75	0	0	0	0	0	0	0	0	3	0	0	0	0	0	55
0e2cb0517fe61bb96bedf605f2fc8c5c_rep;size=336;	k__Bacteria	p__Deinococcus-Thermus	c__Deinococci	o__Deinococcales	f__Trueperaceae	g__Truepera	g__Truepera	2	0	0	0	0	0	0	0	1	1	0	0	0	1	1	9	0	0	0	0	1	0	0	0	0	0	0	14	0	0	0	0	5	0	0	0	56	0	0	2	0	2
f31584d5003f1ab04c7f72c5d5225855_rep;size=335;	k__Bacteria	p__Proteobacteria	c__Alphaproteobacteria	o__Sphingomonadales	f__Sphingomonadaceae	g__Sphingomonas	g__Sphingomonas	11	2	0	1	0	0	0	0	0	0	2	0	0	0	0	2	0	1	1	0	1	0	0	0	5	0	1	18	1	0	0	0	7	0	0	3	13	0	0	3	0	1
f7152132a1ad3e522f74757da9782d89_rep;size=335;	Unassigned	Unassigned	Unassigned	Unassigned	Unassigned	Unassigned	Unassigned	12	0	0	1	0	0	2	8	0	0	0	5	0	5	0	0	0	7	0	0	0	1	1	1	2	17	2	1	2	0	14	0	0	0	10	1	5	5	0	2	5	5
8212311fdb82155474ad27c2a425a9e1_rep;size=335;	Unassigned	Unassigned	Unassigned	Unassigned	Unassigned	Unassigned	Unassigned	1	0	3	0	0	0	2	11	0	0	0	1	0	2	0	4	0	1	0	0	0	4	1	0	1	9	5	11	4	0	4	0	1	0	16	5	6	1	0	3	0	19
0b2dcf70078aff9f3c8efc9fe050958d_rep;size=335;	Unassigned	Unassigned	Unassigned	Unassigned	Unassigned	Unassigned	Unassigned	11	0	1	3	0	0	0	2	0	0	2	0	30	0	0	7	13	1	0	0	1	2	4	14	2	0	1	1	9	0	3	0	2	0	2	6	3	1	0	3	2	0
de49a4bc96ca3894cc084ab4427d3e31_rep;size=334;	Unassigned	Unassigned	Unassigned	Unassigned	Unassigned	Unassigned	Unassigned	0	0	2	0	1	0	0	4	0	0	0	1	0	0	0	6	0	2	0	0	0	3	0	0	1	9	6	8	0	0	1	0	4	0	19	4	10	0	0	2	0	25
cd70ae346d94c2d60f3db5a97b290be7_rep;size=332;	k__Bacteria	p__Proteobacteria	c__Alphaproteobacteria	o__Rhizobiales	f__Xanthobacteraceae	f__Xanthobacteraceae	f__Xanthobacteraceae	1	0	0	0	1	0	0	0	0	0	0	0	0	0	0	0	0	0	0	0	0	0	0	0	4	0	0	0	54	0	13	1	3	1	0	0	0	0	9	0	1	0
849c8179a62919a1b5c4766d089df22c_rep;size=332;	k__Bacteria	p__Proteobacteria	c__Alphaproteobacteria	o__Rhodobacterales	f__Rhodobacteraceae	g__Paracoccus	g__Paracoccus	0	0	0	0	0	0	166	0	0	0	0	0	0	0	0	4	0	17	0	0	0	0	0	0	0	0	0	0	0	0	0	0	0	0	0	0	0	0	0	0	0	0
4301663f114d3e8ed1e05e0427c073ba_rep;size=332;	Unassigned	Unassigned	Unassigned	Unassigned	Unassigned	Unassigned	Unassigned	21	0	1	0	2	0	0	7	0	0	0	1	2	1	0	3	4	0	0	0	0	3	2	1	0	0	1	4	7	0	17	0	4	0	3	9	7	0	1	5	4	3
8d585f3b880631a1476972ac7b87af0f_rep;size=331;	k__Bacteria	p__Proteobacteria	c__Gammaproteobacteria	o__Pseudomonadales	f__Pseudomonadaceae	g__Pseudomonas	Ambiguous_taxa	0	0	0	0	0	0	0	0	0	0	0	1	0	0	0	0	0	0	0	30	0	0	0	0	0	0	0	0	0	170	0	0	0	0	1	0	0	0	11	0	0	0
e2483dcff238a5310cbc806b3f88abef_rep;size=331;	k__Bacteria	p__Proteobacteria	c__Alphaproteobacteria	o__Sphingomonadales	f__Sphingomonadaceae	g__Novosphingobium	g__Novosphingobium	0	3	0	0	2	0	0	0	0	0	4	0	0	0	0	0	0	0	0	6	0	0	5	2	2	0	0	0	0	0	0	1	0	0	0	8	0	0	0	1	0	0
d33f4c9b697a172b5e6b6ffa9fba478e_rep;size=331;	k__Bacteria	p__Bacteroidetes	c__Bacteroidia	o__Sphingobacteriales	f__Sphingobacteriaceae	g__Pedobacter	Ambiguous_taxa	0	36	1	2	0	0	0	0	0	0	0	7	0	0	0	0	0	0	0	0	0	15	0	0	0	0	0	0	0	0	0	0	0	0	0	0	0	0	0	0	0	2
ffa71cac6983295c82696db67759b884_rep;size=330;	Unassigned	Unassigned	Unassigned	Unassigned	Unassigned	Unassigned	Unassigned	0	0	0	0	0	10	0	0	2	0	0	0	0	0	1	0	0	0	3	1	0	0	0	0	0	0	0	0	1	0	0	0	1	0	0	1	0	0	0	1	0	0
599088dda9fac62bc6e6050d35c050bc_rep;size=330;	k__Bacteria	p__Proteobacteria	c__Alphaproteobacteria	o__Rhizobiales	f__Beijerinckiaceae	g__Methylobacterium	Ambiguous_taxa	0	0	0	0	0	0	0	0	0	129	1	0	0	0	0	0	0	0	17	0	0	0	1	0	0	0	0	0	0	0	0	0	0	0	0	0	0	0	0	0	0	0
774e663350cd0c29f8e19c8077404603_rep;size=330;	k__Bacteria	p__Actinobacteria	c__Actinobacteria	o__Micrococcales	f__Micrococcaceae	g__Kocuria	g__Kocuria	5	1	2	2	0	1	1	6	0	0	0	0	0	5	0	12	0	4	0	0	1	0	0	0	2	0	0	6	3	0	2	0	7	0	2	6	5	0	1	6	1	3
b767acee7d4dc333c0e60e2fa99a527b_rep;size=329;	k__Bacteria	p__Proteobacteria	c__Gammaproteobacteria	o__Betaproteobacteriales	f__Burkholderiaceae	g__Duganella	g__Duganella	0	0	137	13	0	0	0	4	0	0	0	4	0	1	0	3	33	1	0	6	0	0	0	6	2	0	0	3	3	0	1	19	2	0	2	0	2	0	11	4	0	1
288dfa23e6d5cf45d6e0131fd62d1d2c_rep;size=328;	k__Bacteria	p__Proteobacteria	c__Alphaproteobacteria	o__Sphingomonadales	f__Sphingomonadaceae	g__Sphingomonas	Ambiguous_taxa	4	0	0	1	0	6	0	0	9	8	9	0	0	0	28	0	0	1	19	0	6	0	0	0	2	0	0	2	0	0	1	0	4	0	0	0	0	0	0	0	0	0
8b06133906d2c9f85dbf2ef4b1115f7f_rep;size=328;	k__Bacteria	p__Actinobacteria	c__Actinobacteria	o__Micrococcales	f__Micrococcaceae	g__Kocuria	g__Kocuria	1	0	0	0	1	0	1	4	0	0	0	0	0	2	0	4	0	0	0	0	0	5	1	0	2	17	1	21	1	0	1	0	1	1	5	0	5	0	0	2	3	2
8b6d23e4eea012236b10b5b3bde5c3b1_rep;size=326;	k__Bacteria	p__Proteobacteria	c__Gammaproteobacteria	o__Pseudomonadales	f__Pseudomonadaceae	g__Pseudomonas	g__Pseudomonas	0	0	0	0	0	0	0	0	134	0	0	0	0	1	0	0	1	0	0	1	0	1	0	0	1	0	0	0	0	2	0	0	0	0	0	0	0	0	0	0	0	0
78438ae656e7e7eaa25456ce6df5c21b_rep;size=326;	k__Bacteria	p__Proteobacteria	c__Alphaproteobacteria	o__Sphingomonadales	f__Sphingomonadaceae	g__Sphingomonas	g__Sphingomonas	0	0	0	7	0	0	0	0	0	0	39	0	0	0	0	0	0	0	0	0	0	0	0	0	0	0	0	0	0	0	0	0	0	0	1	26	0	0	0	1	0	0
eb81408568f47f5689df0bf1e370fd69_rep;size=326;	k__Bacteria	p__Actinobacteria	c__Actinobacteria	o__Micrococcales	f__Micrococcaceae	f__Micrococcaceae	f__Micrococcaceae	2	0	0	0	7	0	0	0	0	1	0	0	0	2	0	2	0	3	0	0	0	0	1	0	0	0	0	2	0	0	0	0	1	0	0	41	1	0	2	9	0	0
538ed13a590df5a293b0a61e085d4398_rep;size=326;	k__Bacteria	p__Proteobacteria	c__Alphaproteobacteria	o__Rhodobacterales	f__Rhodobacteraceae	g__Paracoccus	g__Paracoccus	6	0	2	0	0	0	0	4	0	0	0	0	0	0	0	0	0	2	0	0	1	1	0	0	1	8	2	11	1	0	0	0	1	0	7	2	14	0	0	0	0	3
af45db859761749135c80fdd9b8e212e_rep;size=325;	Unassigned	Unassigned	Unassigned	Unassigned	Unassigned	Unassigned	Unassigned	4	0	0	0	0	0	0	0	0	0	0	0	0	0	0	5	1	1	0	0	0	0	0	0	1	0	4	14	2	0	1	0	0	0	4	9	19	0	0	17	0	0
25d25cd3c1608e13a0c1bcf96814e07a_rep;size=325;	k__Bacteria	p__Bacteroidetes	c__Bacteroidia	o__Cytophagales	f__Hymenobacteraceae	g__Hymenobacter	s__uncultured bacterium	0	0	0	7	0	0	0	0	44	0	0	0	0	0	0	0	0	0	4	0	0	0	0	0	0	1	0	0	0	8	0	0	0	0	0	0	0	2	3	0	0	0
5448b15f089e74d7d646cd88e87abb73_rep;size=324;	k__Bacteria	p__Actinobacteria	c__Actinobacteria	o__Propionibacteriales	f__Nocardioidaceae	g__Nocardioides	g__Nocardioides	1	0	0	1	17	2	1	0	2	0	0	2	0	5	0	0	0	2	0	0	0	1	0	0	0	8	0	2	32	6	1	0	1	0	6	1	4	0	9	1	0	1
36fc3641ac616b0049cffc718081ab68_rep;size=324;	k__Bacteria	p__Proteobacteria	c__Alphaproteobacteria	o__Caulobacterales	f__Caulobacteraceae	g__uncultured	g__uncultured	0	0	0	0	0	0	0	0	0	0	0	0	0	0	0	0	0	0	0	0	0	0	0	0	0	0	0	0	0	0	0	0	0	0	0	0	0	0	0	0	0	0
97b5337cadaa897fdcdbbb149967f39c_rep;size=323;	k__Bacteria	p__Proteobacteria	c__Alphaproteobacteria	o__Acetobacterales	f__Acetobacteraceae	g__Acetobacter	g__Acetobacter	0	0	0	0	0	0	0	0	0	0	0	0	0	0	0	0	0	0	0	0	0	0	0	0	0	0	0	0	0	0	0	0	0	0	0	0	0	0	0	0	0	0
8cb24777cb48dde0aac60dfeca125d10_rep;size=323;	k__Bacteria	p__Firmicutes	c__Bacilli	o__Bacillales	f__Bacillaceae	g__Bacillus	g__Bacillus	0	0	0	1	4	2	1	1	2	7	2	2	0	2	0	0	0	2	1	2	0	0	1	0	1	0	0	1	2	3	0	0	3	18	1	0	4	0	7	0	0	1
a2f3fb6b175ca07876374d3b67ad4017_rep;size=323;	k__Bacteria	p__Proteobacteria	c__Alphaproteobacteria	o__Sphingomonadales	f__Sphingomonadaceae	g__Sphingomonas	g__Sphingomonas	0	0	0	27	0	18	0	0	1	0	14	0	0	0	0	0	2	0	0	0	0	0	4	1	0	0	0	1	0	0	6	0	17	0	0	0	0	0	0	0	0	0
c7b1e3075f8feed06522d9119019e260_rep;size=323;	Unassigned	Unassigned	Unassigned	Unassigned	Unassigned	Unassigned	Unassigned	0	2	0	2	0	50	0	0	0	0	9	0	0	0	1	0	8	0	0	0	14	0	0	0	0	0	0	4	3	0	0	0	0	0	1	0	3	0	0	1	0	0
eababa30ab4bf85e4636a00f79e08e07_rep;size=322;	k__Bacteria	p__Bacteroidetes	c__Bacteroidia	o__Cytophagales	f__Spirosomaceae	g__Dyadobacter	g__Dyadobacter	0	17	0	0	0	0	0	0	0	0	0	0	0	0	11	3	0	0	0	14	0	0	0	0	1	0	0	0	0	0	0	0	0	2	0	0	0	0	1	0	0	0
712570c459ab238706584ba8f75ba2ff_rep;size=321;	k__Bacteria	p__Proteobacteria	c__Gammaproteobacteria	o__Betaproteobacteriales	f__Burkholderiaceae	g__Massilia	g__Massilia	0	0	0	0	0	0	0	0	2	0	0	0	0	0	0	0	0	0	1	248	0	0	0	0	0	0	0	0	0	49	0	0	0	0	0	0	0	0	0	0	0	0
4db1c37f492f4f3d1888bc23d4a7964f_rep;size=321;	k__Bacteria	p__Proteobacteria	c__Alphaproteobacteria	o__Sphingomonadales	f__Sphingomonadaceae	g__Sphingomonas	Ambiguous_taxa	0	0	0	1	0	33	0	0	0	0	1	0	59	0	0	0	1	0	0	0	0	0	0	22	0	0	0	0	0	0	11	1	2	0	0	0	0	1	0	0	0	0
1b0ba5e99079709bfa2759ed6fcdd6d3_rep;size=321;	Unassigned	Unassigned	Unassigned	Unassigned	Unassigned	Unassigned	Unassigned	1	3	0	6	0	18	0	0	3	0	2	0	0	0	0	0	8	0	5	0	27	0	0	0	1	0	1	4	0	2	2	2	3	0	0	4	2	0	3	0	0	0
03f875c29b76964bee374d87bf48c4ea_rep;size=319;	Unassigned	Unassigned	Unassigned	Unassigned	Unassigned	Unassigned	Unassigned	0	68	0	0	0	0	0	0	0	0	0	0	0	0	0	0	0	0	0	0	0	0	0	0	0	0	0	0	0	0	0	2	0	0	0	0	0	0	1	0	0	0
23bec6b3b51cae83a5ef25407bdbbbc3_rep;size=319;	Unassigned	Unassigned	Unassigned	Unassigned	Unassigned	Unassigned	Unassigned	0	0	0	0	0	0	0	0	0	0	0	0	0	0	0	0	0	0	0	0	0	0	0	0	0	0	0	0	0	0	0	0	0	0	0	0	0	0	0	0	0	0
48c8eca09339b1ee1b7a403ad88bd76f_rep;size=319;	Unassigned	Unassigned	Unassigned	Unassigned	Unassigned	Unassigned	Unassigned	0	0	2	6	0	0	0	19	0	0	0	2	0	0	0	0	0	5	0	1	0	8	4	0	0	3	1	13	7	0	11	0	0	2	3	0	1	3	0	0	0	23
e18cb3b3ef3f8a4e25c19345e0f6cd41_rep;size=319;	k__Bacteria	p__Cyanobacteria	c__Oxyphotobacteria	o__Nostocales	f__Chroococcidiopsaceae	g__Aliterella CENA595	g__Aliterella CENA595	11	0	2	0	3	0	0	0	0	0	0	0	0	3	0	1	0	3	0	0	1	0	0	0	59	0	0	17	0	4	0	0	9	0	0	0	10	0	0	0	0	0
46072508651b799d14fed061888ec2ea_rep;size=319;	k__Bacteria	p__Proteobacteria	c__Gammaproteobacteria	o__Enterobacteriales	f__Enterobacteriaceae	f__Enterobacteriaceae	f__Enterobacteriaceae	0	0	131	0	2	0	0	2	0	0	0	3	0	16	0	2	0	0	3	0	0	0	2	0	2	0	1	0	0	0	0	0	1	0	0	0	0	0	0	0	0	0
6e8ce3eb1037c4b4c962aab9e793c9e7_rep;size=319;	Unassigned	Unassigned	Unassigned	Unassigned	Unassigned	Unassigned	Unassigned	0	0	0	0	0	1	0	0	0	0	0	0	0	0	0	0	68	1	0	22	0	0	5	1	0	0	0	0	0	3	0	0	10	0	0	1	0	0	0	2	0	0
e4613628b83923c265a0c24efb0244f4_rep;size=319;	k__Bacteria	p__Firmicutes	c__Bacilli	o__Bacillales	f__Bacillaceae	g__Bacillus	g__Bacillus	0	0	0	2	14	0	1	0	4	13	0	2	0	4	0	1	0	5	0	1	0	0	1	0	2	0	0	30	0	5	0	0	2	12	0	7	4	0	5	0	0	0
5bcb1cd3752a6df13e7a4ef26118cd10_rep;size=318;	k__Bacteria	p__Proteobacteria	c__Alphaproteobacteria	o__Rhodobacterales	f__Rhodobacteraceae	g__Paracoccus	g__Paracoccus	0	0	10	0	0	0	6	7	0	0	0	2	2	9	0	16	1	3	0	0	0	14	4	2	0	1	33	0	4	0	0	0	0	0	4	21	0	0	0	28	0	2
e3440b55162106902ee2f0af4159f465_rep;size=318;	k__Bacteria	p__Proteobacteria	c__Alphaproteobacteria	o__Rhodobacterales	f__Rhodobacteraceae	g__Paracoccus	g__Paracoccus	3	0	1	0	0	0	0	6	0	0	0	0	0	0	0	1	0	6	0	0	0	3	0	0	1	9	3	9	0	0	0	0	0	0	10	3	8	0	0	0	0	14
0ddaf8adb9ec560e547ef04e9c38d4c9_rep;size=318;	Unassigned	Unassigned	Unassigned	Unassigned	Unassigned	Unassigned	Unassigned	1	2	30	0	0	0	1	16	0	0	0	20	1	2	0	0	1	2	0	0	0	26	0	2	0	1	66	1	0	0	2	0	1	0	0	4	0	1	0	1	8	27
10971efd55e62f9e77ea678ae8cada13_rep;size=317;	k__Bacteria	p__Proteobacteria	c__Alphaproteobacteria	o__Rhizobiales	f__Devosiaceae	g__Devosia	g__Devosia	0	0	0	1	0	1	40	0	0	0	0	0	0	0	2	0	0	0	0	25	0	0	0	3	1	0	0	0	1	0	1	0	0	0	0	2	0	0	0	0	7	0
f7697ad70add7b4e34e11d3456310003_rep;size=317;	k__Bacteria	p__Actinobacteria	c__Actinobacteria	o__Micrococcales	f__Micrococcaceae	f__Micrococcaceae	f__Micrococcaceae	0	0	17	0	0	0	1	14	0	0	0	13	0	0	0	0	0	2	0	0	0	28	0	2	0	4	33	0	1	2	2	0	1	1	0	1	0	0	0	1	12	12
ac022aa389318a4e61d23357bf83aeb9_rep;size=317;	Unassigned	Unassigned	Unassigned	Unassigned	Unassigned	Unassigned	Unassigned	2	0	0	0	0	1	0	0	0	0	1	0	0	0	0	1	1	1	2	0	3	0	0	0	0	0	0	3	0	0	1	0	3	0	1	7	10	0	0	5	0	0
805db8fd67dd7f1a3f89f088ba1a4a00_rep;size=317;	Unassigned	Unassigned	Unassigned	Unassigned	Unassigned	Unassigned	Unassigned	4	1	2	0	0	1	0	0	0	1	2	1	0	0	0	4	0	2	2	0	0	0	2	0	0	1	3	9	3	0	1	0	2	0	0	1	9	0	0	7	2	1
9dd89e59c657a67b68ae8e25e39b5bad_rep;size=317;	Unassigned	Unassigned	Unassigned	Unassigned	Unassigned	Unassigned	Unassigned	8	0	1	1	0	4	0	1	0	2	0	0	0	1	0	0	0	0	0	0	1	0	0	0	2	0	0	4	3	0	8	2	1	0	0	13	4	0	0	14	1	2
62d208db2da23c327333ea9d1240d632_rep;size=317;	k__Bacteria	p__Proteobacteria	c__Alphaproteobacteria	o__Sphingomonadales	f__Sphingomonadaceae	g__Sphingomonas	g__Sphingomonas	0	0	0	1	0	2	0	0	0	68	64	0	0	0	0	0	0	0	2	1	2	0	0	0	1	0	0	0	1	0	0	0	0	0	0	0	0	0	0	0	0	0
45aed3b4a4b3230955d79ffc0db02777_rep;size=316;	k__Bacteria	p__Proteobacteria	c__Alphaproteobacteria	o__Sphingomonadales	f__Sphingomonadaceae	g__Sphingomonas	g__Sphingomonas	0	0	0	0	0	0	0	0	0	0	0	0	0	0	0	1	0	3	0	0	0	0	0	0	0	0	0	1	0	0	0	0	0	0	0	0	3	0	0	1	0	1
87baec981f8c3bff0ac4f3e84908ad97_rep;size=316;	k__Bacteria	p__Actinobacteria	c__Actinobacteria	o__Micrococcales	f__Micrococcaceae	g__Kocuria	g__Kocuria	4	0	1	0	0	0	0	10	0	0	0	11	0	5	0	8	0	8	0	0	0	5	0	2	2	15	13	7	2	0	15	0	0	0	7	0	0	1	1	1	2	5
f2f45dd93f6750120a7669d7d94f1724_rep;size=315;	k__Bacteria	p__Proteobacteria	c__Alphaproteobacteria	o__Rhizobiales	f__Xanthobacteraceae	g__Bradyrhizobium	g__Bradyrhizobium	0	0	0	0	0	1	0	0	0	0	0	0	0	0	0	0	0	0	0	0	0	0	0	0	0	0	0	0	25	0	0	0	0	0	0	0	0	0	0	0	0	0
e2e5a7ad6bfaf87aaa4f5763a2165280_rep;size=315;	k__Bacteria	p__Proteobacteria	c__Alphaproteobacteria	o__Caulobacterales	f__Caulobacteraceae	g__Brevundimonas	g__Brevundimonas	13	1	0	2	0	7	0	0	0	0	1	0	2	0	0	0	36	0	0	9	44	0	0	12	0	0	0	0	0	0	0	2	1	0	0	0	0	0	0	0	0	0
5c85453c171474ac214f0f347149e603_rep;size=315;	k__Bacteria	p__Proteobacteria	c__Alphaproteobacteria	o__Rhizobiales	f__Beijerinckiaceae	g__Methylobacterium	g__Methylobacterium	0	0	0	0	0	0	0	0	0	0	0	0	1	0	7	0	0	0	0	0	1	0	0	0	0	0	0	0	16	0	0	0	0	2	0	0	0	0	0	0	0	0
9f6eee641ec4d2f7f33020b1e3e79fb4_rep;size=315;	Unassigned	Unassigned	Unassigned	Unassigned	Unassigned	Unassigned	Unassigned	0	0	0	2	0	5	0	0	0	0	1	0	0	0	0	1	0	0	24	0	2	0	0	0	0	0	0	0	0	0	0	0	0	2	0	5	0	2	0	0	0	0
3d561c26bd0798b35bd9e57b5a346170_rep;size=314;	k__Bacteria	p__Firmicutes	c__Bacilli	o__Lactobacillales	f__Carnobacteriaceae	f__Carnobacteriaceae	f__Carnobacteriaceae	0	0	0	0	0	0	4	3	0	0	0	1	0	1	1	0	0	1	0	0	0	0	0	0	0	0	3	0	0	0	0	0	0	1	1	0	0	4	0	0	1	1
638b1805ec6ead079ef6d54c5b86528d_rep;size=313;	k__Bacteria	p__Proteobacteria	c__Alphaproteobacteria	o__Azospirillales	f__Azospirillaceae	g__Skermanella	g__Skermanella	0	0	0	0	1	0	11	0	0	2	0	1	0	0	0	0	0	8	0	0	0	0	0	0	1	0	0	1	3	0	0	0	0	0	0	0	0	0	0	0	1	0
73215adc27425394a9b5245fbb025ded_rep;size=313;	k__Bacteria	p__Proteobacteria	c__Alphaproteobacteria	o__Rhizobiales	f__Beijerinckiaceae	g__Methylobacterium	Ambiguous_taxa	0	0	0	0	0	2	0	0	0	74	0	0	0	0	0	0	0	0	3	0	0	0	0	0	0	0	0	0	0	0	0	0	0	0	0	0	0	0	0	0	0	0
dc8612c7cc5c07897d5f78fd7a652e62_rep;size=312;	k__Bacteria	p__Proteobacteria	c__Alphaproteobacteria	o__Rhizobiales	f__Devosiaceae	g__Devosia	g__Devosia	2	0	1	17	2	0	3	5	0	0	0	0	0	9	0	16	0	3	0	0	0	0	1	1	1	0	0	10	12	0	0	1	4	0	1	16	1	0	0	12	0	0
881064fa12640b24d5d4002564262acb_rep;size=312;	Unassigned	Unassigned	Unassigned	Unassigned	Unassigned	Unassigned	Unassigned	0	0	0	0	0	3	0	0	0	0	0	0	0	0	0	3	1	0	0	0	0	0	0	0	0	1	0	0	0	0	0	0	0	1	0	0	0	0	0	0	0	0
869b76f7ba5b4430aab79f4833b074d2_rep;size=312;	k__Bacteria	p__Proteobacteria	c__Alphaproteobacteria	o__Sphingomonadales	f__Sphingomonadaceae	g__Sphingomonas	Ambiguous_taxa	4	0	0	17	0	1	0	0	0	0	1	0	1	0	0	0	3	0	0	0	0	0	9	27	0	0	0	3	1	0	26	5	5	0	0	0	0	0	0	0	2	0
5d6159af0df3c6817d6cdc9ba1a75993_rep;size=312;	Unassigned	Unassigned	Unassigned	Unassigned	Unassigned	Unassigned	Unassigned	2	0	0	0	0	2	0	0	0	0	82	0	0	0	1	5	1	0	16	2	9	0	0	0	1	0	0	0	0	0	0	0	1	0	0	0	2	0	0	2	0	0
14c7b2721c251e48f1be92bd5f52617b_rep;size=312;	Unassigned	Unassigned	Unassigned	Unassigned	Unassigned	Unassigned	Unassigned	3	0	1	0	1	0	2	1	0	1	1	0	0	0	0	1	0	0	0	0	5	0	2	0	3	0	0	7	0	0	0	0	14	0	1	4	5	0	0	0	2	1
dc34b1b8eb9398fd44e58ed7d96e3de4_rep;size=311;	k__Bacteria	p__Proteobacteria	c__Alphaproteobacteria	o__Rhodobacterales	f__Rhodobacteraceae	g__Paracoccus	g__Paracoccus	4	0	6	0	0	0	1	12	0	0	0	0	0	0	0	4	0	3	0	0	0	1	1	0	0	0	13	6	8	0	6	11	0	0	3	11	6	0	0	22	4	10
c5e47b7b59e3b9fbfcc27e103adaca95_rep;size=310;	k__Bacteria	p__Proteobacteria	c__Alphaproteobacteria	o__Acetobacterales	f__Acetobacteraceae	g__Roseomonas	g__Roseomonas	0	0	0	0	0	1	1	0	0	0	0	0	0	0	0	12	1	0	0	0	0	0	0	0	0	0	2	0	11	0	10	0	0	4	0	0	0	0	0	11	3	0
38d9f2bae28006d4d1bef4af8fcc1ad9_rep;size=310;	k__Bacteria	p__Firmicutes	c__Clostridia	o__Clostridiales	f__Clostridiaceae 1	g__Clostridium sensu stricto 2	Ambiguous_taxa	0	0	0	0	0	0	0	0	0	0	0	0	0	0	2	0	0	1	0	4	1	0	0	4	1	0	0	2	0	142	0	15	1	88	0	0	1	0	0	0	0	0
b0e22ac763fb41efb657fa532bf32bae_rep;size=310;	k__Bacteria	p__Proteobacteria	c__Alphaproteobacteria	o__Sphingomonadales	f__Sphingomonadaceae	g__Altererythrobacter	Ambiguous_taxa	0	0	0	0	1	0	0	0	0	2	0	1	0	0	0	0	0	1	0	0	0	0	0	0	0	0	0	0	0	0	0	0	0	0	0	0	0	0	0	0	0	0
437dfd22d157c5dd6c512318c3eeaa81_rep;size=309;	Unassigned	Unassigned	Unassigned	Unassigned	Unassigned	Unassigned	Unassigned	8	1	2	1	0	0	2	3	0	0	1	2	18	0	0	0	19	1	0	0	2	4	1	15	4	1	3	4	8	2	9	0	1	0	2	6	3	0	1	0	5	2
bc72ada872f6bb0dcc5f1f9f71b47e87_rep;size=309;	k__Bacteria	p__Actinobacteria	c__Actinobacteria	o__Micrococcales	f__Micrococcaceae	g__Nesterenkonia	g__Nesterenkonia	0	0	7	0	0	0	139	4	0	0	0	7	0	0	0	0	0	2	0	0	0	0	0	0	0	0	18	0	0	6	0	0	0	10	0	0	0	0	0	0	64	1
30079011ef73b4dff5be465a4a73ad8d_rep;size=309;	k__Bacteria	p__Actinobacteria	c__Actinobacteria	o__Propionibacteriales	f__Propionibacteriaceae	g__Microlunatus	g__Microlunatus	1	2	0	1	1	0	12	1	0	0	0	5	0	10	0	0	0	1	0	1	0	1	7	0	0	13	2	1	2	9	3	0	0	118	4	10	1	1	0	6	0	4
e02a8971d663f2842759666fa8f51f43_rep;size=309;	k__Bacteria	p__Actinobacteria	c__Actinobacteria	o__Micrococcales	Ambiguous_taxa	Ambiguous_taxa	Ambiguous_taxa	16	0	1	1	0	0	5	8	0	0	0	1	1	2	0	12	1	13	0	0	1	2	17	0	2	1	6	2	5	1	3	0	2	1	3	1	3	1	0	8	12	4
4a0b554cf9103bd75abae0358710b786_rep;size=308;	k__Bacteria	p__Proteobacteria	c__Gammaproteobacteria	o__Betaproteobacteriales	f__Burkholderiaceae	f__Burkholderiaceae	f__Burkholderiaceae	6	0	0	0	4	0	1	1	1	4	0	1	0	2	0	4	0	8	1	0	0	1	0	0	7	0	3	1	2	0	1	0	17	0	1	0	1	0	1	17	1	1
87d5584c1087e3e5f575ed1f5de959fc_rep;size=308;	k__Bacteria	p__Proteobacteria	c__Alphaproteobacteria	o__Rhizobiales	f__Xanthobacteraceae	f__Xanthobacteraceae	f__Xanthobacteraceae	0	12	0	0	0	0	1	0	0	0	1	0	0	4	0	1	0	0	1	0	0	0	0	0	2	0	0	1	25	4	12	4	9	1	0	17	0	0	0	0	6	0
60023fc4c12cc6f212d5caf69f23b07e_rep;size=308;	k__Bacteria	p__Proteobacteria	c__Alphaproteobacteria	o__Sphingomonadales	f__Sphingomonadaceae	g__Sphingomonas	g__Sphingomonas	6	2	1	0	0	0	0	2	0	0	2	2	0	0	0	8	1	0	3	0	3	2	1	0	1	1	1	3	3	0	3	0	1	0	2	2	2	4	0	3	3	1
10aff8dce88a1a09f070b8c1d17f49cc_rep;size=307;	k__Bacteria	p__Proteobacteria	c__Alphaproteobacteria	o__Rhodobacterales	f__Rhodobacteraceae	g__uncultured	s__uncultured bacterium	14	0	0	2	0	0	0	0	1	0	0	0	0	0	0	0	3	0	0	0	0	0	2	0	1	0	1	4	1	0	3	0	0	0	3	1	5	0	0	1	1	0
4e48a353591b3ac420173a12cf5c65da_rep;size=307;	k__Bacteria	p__Proteobacteria	c__Alphaproteobacteria	o__Sphingomonadales	f__Sphingomonadaceae	g__Sphingomonas	g__Sphingomonas	2	2	0	2	0	6	0	0	43	0	23	0	0	0	0	5	0	0	1	1	10	0	2	0	3	0	0	3	3	0	0	0	4	0	0	3	5	0	0	2	0	0
7ed3d7d20db3304f1fb4f0554218d9ce_rep;size=307;	k__Bacteria	p__Proteobacteria	c__Alphaproteobacteria	o__Rhodobacterales	f__Rhodobacteraceae	g__Rubellimicrobium	g__Rubellimicrobium	0	0	0	0	4	0	10	3	1	0	0	0	0	28	0	0	0	2	0	0	0	0	6	0	3	0	1	3	1	0	0	0	1	0	0	0	1	0	0	7	0	0
9ec29ac332abccc2bcf2d78e1824aa05_rep;size=306;	k__Bacteria	p__Proteobacteria	c__Gammaproteobacteria	o__Alteromonadales	f__Alteromonadaceae	g__Rheinheimera	Ambiguous_taxa	0	0	0	0	2	0	2	7	0	0	0	2	0	3	0	0	0	8	0	0	0	5	0	0	4	0	9	102	3	0	17	0	1	0	0	4	1	0	0	0	15	1
049ee2c7a4d3d96f53c823d9d22e5dc6_rep;size=306;	Unassigned	Unassigned	Unassigned	Unassigned	Unassigned	Unassigned	Unassigned	11	2	4	1	1	1	0	7	0	0	1	5	9	0	0	0	1	9	0	0	0	12	0	5	1	0	14	5	2	0	0	2	0	0	0	0	3	0	6	0	3	6
c4d86f4e9c7098216a2f62f1000e1dd2_rep;size=306;	Unassigned	Unassigned	Unassigned	Unassigned	Unassigned	Unassigned	Unassigned	0	0	0	3	0	11	0	0	10	4	59	0	0	0	0	1	0	0	49	0	19	0	1	0	0	0	0	2	0	0	0	0	4	0	0	1	0	0	1	1	0	0
6ffda339a78274ad1bdc4cac81fcf210_rep;size=304;	k__Bacteria	p__Firmicutes	c__Bacilli	o__Lactobacillales	f__Streptococcaceae	g__Streptococcus	s__uncultured bacterium	0	0	0	0	0	0	0	0	0	0	0	0	0	0	0	0	0	0	0	0	0	0	0	0	0	0	0	0	0	0	0	0	0	0	0	0	0	0	0	0	0	0
bc811ff356094368b3ddfdd63d72dd35_rep;size=303;	k__Bacteria	p__Actinobacteria	c__Actinobacteria	o__Micrococcales	f__Micrococcaceae	f__Micrococcaceae	f__Micrococcaceae	4	0	0	0	2	0	5	1	0	0	0	3	0	7	0	3	0	11	0	0	1	0	2	1	8	0	0	1	1	4	0	0	5	2	3	5	2	2	8	2	0	4
60e0a40456ca4c81abab3d2095f1a2d3_rep;size=302;	k__Bacteria	p__Proteobacteria	c__Alphaproteobacteria	o__Caulobacterales	f__Caulobacteraceae	g__Brevundimonas	g__Brevundimonas	0	0	0	1	0	31	19	1	0	0	0	0	0	1	0	0	0	0	0	3	0	0	4	0	0	0	0	0	0	0	67	0	0	0	0	0	0	0	0	0	2	0
5ebb2505b49164801533aefd00b56b9e_rep;size=302;	k__Bacteria	p__Bacteroidetes	c__Bacteroidia	o__Cytophagales	f__Hymenobacteraceae	g__Hymenobacter	Ambiguous_taxa	0	18	0	4	0	0	0	1	2	0	9	0	0	0	0	0	0	0	0	0	0	2	0	0	0	0	0	0	0	0	0	0	1	0	1	0	0	0	0	0	0	0
76a01511774cd689311b896c1d77de9c_rep;size=302;	k__Bacteria	p__Proteobacteria	c__Gammaproteobacteria	o__Enterobacteriales	f__Enterobacteriaceae	g__Yersinia	Ambiguous_taxa	0	0	0	0	0	0	0	0	162	0	0	0	0	0	0	0	0	0	0	0	0	0	0	0	0	0	0	0	0	0	0	0	1	0	0	0	0	0	0	0	0	0
ac5c981c2bff93bc36c930329547d0ad_rep;size=300;	Unassigned	Unassigned	Unassigned	Unassigned	Unassigned	Unassigned	Unassigned	0	0	1	0	0	0	0	3	0	0	0	0	0	0	0	3	1	0	2	0	0	0	6	0	0	0	1	12	3	0	0	0	1	0	4	3	6	0	0	1	0	2
253882b31bcdaf172aa956f9f42aa5c5_rep;size=300;	k__Bacteria	p__Proteobacteria	c__Deltaproteobacteria	o__Myxococcales	f__P3OB-42	g__uncultured bacterium	s__uncultured bacterium	2	0	0	4	1	0	0	0	10	0	0	0	5	0	0	0	0	2	0	0	0	0	13	7	0	0	0	0	0	0	6	1	4	0	0	1	2	0	3	0	0	0
b148eddace6150ada4544686209757cd_rep;size=299;	k__Bacteria	p__Actinobacteria	c__Actinobacteria	o__Pseudonocardiales	f__Pseudonocardiaceae	g__Pseudonocardia	g__Pseudonocardia	0	0	0	0	0	0	6	0	0	0	0	1	0	1	0	0	0	0	0	0	0	0	0	0	0	0	0	0	0	59	0	0	0	191	0	7	0	0	4	0	0	0
7b5b0445eac6cc5060c04cd13a9ca66a_rep;size=299;	k__Bacteria	p__Actinobacteria	c__Actinobacteria	o__Micrococcales	f__Microbacteriaceae	g__Microbacterium	g__Microbacterium	0	0	0	5	2	4	1	0	0	0	0	1	4	0	0	0	0	1	0	2	1	0	60	1	0	0	0	0	6	2	0	0	0	22	2	4	0	2	0	2	3	0
5c147e30ee740d7d91e81e0cf680c486_rep;size=299;	Unassigned	Unassigned	Unassigned	Unassigned	Unassigned	Unassigned	Unassigned	6	0	3	0	0	6	3	0	0	0	1	0	0	0	0	5	1	0	2	0	3	0	3	0	1	0	1	6	2	0	0	0	1	0	0	7	6	0	0	6	0	0
703c664ecbac313ea69aeea6cfab83aa_rep;size=299;	Unassigned	Unassigned	Unassigned	Unassigned	Unassigned	Unassigned	Unassigned	0	0	0	0	0	1	1	0	0	0	2	0	0	0	0	13	0	0	1	1	2	0	0	0	2	0	0	3	3	0	1	0	3	0	0	0	4	0	0	9	1	0
2f5e846c151cb991af7eb12fa83dfb33_rep;size=298;	k__Bacteria	p__Proteobacteria	c__Alphaproteobacteria	o__Acetobacterales	f__Acetobacteraceae	g__Roseomonas	g__Roseomonas	34	0	0	0	5	0	5	0	0	0	0	0	0	3	0	7	0	0	0	0	0	0	7	0	1	0	4	0	29	0	0	0	1	0	0	0	0	0	1	2	0	0
f8d7bf9cdccbde959a3d9e70b4cd4cbe_rep;size=298;	Unassigned	Unassigned	Unassigned	Unassigned	Unassigned	Unassigned	Unassigned	3	0	0	1	0	0	2	3	0	0	0	1	1	2	1	4	0	1	0	0	0	3	0	0	0	3	1	14	0	0	0	0	1	0	11	7	6	0	0	0	0	5
d1be97598a0d0e61325443667ac86625_rep;size=298;	k__Bacteria	p__Proteobacteria	c__Alphaproteobacteria	o__Sphingomonadales	f__Sphingomonadaceae	g__Sphingomonas	Ambiguous_taxa	0	0	0	0	0	0	0	0	0	145	1	0	0	0	10	0	0	0	0	0	0	0	0	0	0	0	0	0	0	0	0	0	0	0	0	0	1	0	0	0	0	0
97dda5b0a09e110d7d4222b4974bc110_rep;size=297;	k__Bacteria	p__Proteobacteria	c__Alphaproteobacteria	o__Rhizobiales	f__Beijerinckiaceae	g__Methylobacterium	Ambiguous_taxa	0	0	0	1	0	1	0	0	0	0	152	0	0	0	1	0	0	0	2	4	0	0	0	0	0	0	0	0	0	0	0	0	0	1	0	0	0	0	0	0	0	0
0b930e5314451593ea6dbb6eb5ac6ed7_rep;size=297;	k__Bacteria	p__Actinobacteria	c__Actinobacteria	o__Corynebacteriales	f__Dietziaceae	g__Dietzia	Ambiguous_taxa	0	0	0	0	0	0	0	0	0	0	0	0	0	1	0	0	0	0	0	0	0	0	0	0	0	0	0	0	0	54	0	0	0	240	0	0	0	0	0	0	0	0
3f9b590f0f08daeb454a3130ea002966_rep;size=297;	k__Bacteria	p__Firmicutes	c__Bacilli	o__Bacillales	f__Bacillaceae	g__Bacillus	Ambiguous_taxa	0	0	0	8	0	1	119	0	0	0	0	0	0	1	0	0	1	0	0	2	3	0	1	0	0	0	0	0	2	2	0	0	0	32	0	14	1	0	0	0	6	0
e6a9085823e4cc8f1464bd1b04735959_rep;size=295;	Unassigned	Unassigned	Unassigned	Unassigned	Unassigned	Unassigned	Unassigned	0	3	0	1	0	5	0	0	1	0	19	0	0	0	0	2	8	0	25	9	10	0	0	0	0	0	0	1	0	0	0	1	3	0	0	4	0	0	0	3	0	0
8fc0fabfdf5e0826776c43e192eaeaf5_rep;size=295;	k__Bacteria	p__Actinobacteria	c__Actinobacteria	o__Micrococcales	f__Microbacteriaceae	f__Microbacteriaceae	f__Microbacteriaceae	0	0	0	20	4	0	0	0	23	0	0	5	0	1	0	1	0	1	0	0	0	0	6	0	2	0	1	0	4	0	0	0	1	2	0	15	0	3	1	0	2	0
535f1e5956a3e98c1c2330ed54d19df2_rep;size=294;	k__Bacteria	p__Proteobacteria	c__Gammaproteobacteria	o__Enterobacteriales	f__Enterobacteriaceae	g__Pantoea	g__Pantoea	0	0	41	1	1	0	0	1	0	0	0	6	0	2	0	0	3	0	0	0	0	0	2	10	5	1	0	0	0	0	0	0	0	0	0	0	0	0	1	0	0	0
1550ad101a09e1dba87320661413e2f9_rep;size=294;	k__Bacteria	p__Proteobacteria	c__Alphaproteobacteria	o__Rhizobiales	f__Beijerinckiaceae	g__Methylobacterium	Ambiguous_taxa	0	0	0	0	0	31	0	0	1	0	1	0	0	0	15	0	0	0	38	1	1	0	0	0	0	0	0	0	0	0	0	0	0	1	0	0	0	0	0	0	0	0
0907630c9687032d4d09a53a1761c8f7_rep;size=293;	k__Bacteria	p__Proteobacteria	c__Alphaproteobacteria	o__Rhizobiales	f__Rhizobiaceae	g__Allorhizobium-Neorhizobium-Pararhizobium-Rhizobium	Ambiguous_taxa	0	1	0	11	0	1	0	2	1	0	1	0	0	0	41	0	3	0	0	16	1	1	0	0	0	0	1	0	27	0	0	2	0	8	1	0	0	1	1	0	0	0
d3fd873904ffaf2d6a17e691d949da96_rep;size=293;	k__Bacteria	p__Proteobacteria	c__Alphaproteobacteria	o__Rhodospirillales	f__Magnetospirillaceae	g__Magnetospirillum	g__Magnetospirillum	0	0	0	0	0	0	0	0	0	0	0	0	0	0	0	0	0	0	0	0	0	0	0	0	0	0	0	0	0	0	0	0	0	0	0	0	0	0	0	0	0	0
811481735c419d9b0a72996761ef64d7_rep;size=293;	Unassigned	Unassigned	Unassigned	Unassigned	Unassigned	Unassigned	Unassigned	3	0	0	2	0	0	0	0	15	0	0	0	0	0	0	0	0	0	191	0	0	0	0	0	1	0	0	5	0	0	0	0	2	0	0	1	3	0	0	3	0	0
a8170cb886c9a2779efcad5229995b4a_rep;size=293;	k__Bacteria	p__Proteobacteria	c__Alphaproteobacteria	o__Sphingomonadales	f__Sphingomonadaceae	g__Sphingomonas	g__Sphingomonas	0	0	0	0	0	0	0	0	0	66	0	0	0	0	0	0	0	0	0	0	0	0	0	0	0	0	0	0	0	0	0	0	0	1	0	0	0	0	0	0	0	0
b821e300b7544f0b507fd65c9f19d0ca_rep;size=293;	k__Bacteria	p__Firmicutes	c__Bacilli	o__Bacillales	f__Planococcaceae	g__Sporosarcina	Ambiguous_taxa	0	0	0	0	5	0	4	0	0	1	1	0	0	0	0	2	0	2	0	0	0	0	3	0	2	1	0	11	1	108	0	16	5	3	0	1	1	0	0	0	0	2
bf80f38957b3146a6101bdc3b35709a2_rep;size=293;	k__Bacteria	p__Proteobacteria	c__Gammaproteobacteria	o__Enterobacteriales	f__Enterobacteriaceae	f__Enterobacteriaceae	f__Enterobacteriaceae	0	0	1	0	0	0	0	0	173	0	0	0	0	0	0	0	0	0	0	0	0	0	0	0	0	0	0	0	0	0	0	0	0	0	0	0	0	0	0	0	0	0
ed433336db3775fb91cc6bcc0a7d1953_rep;size=293;	k__Bacteria	p__Proteobacteria	c__Alphaproteobacteria	o__Sphingomonadales	f__Sphingomonadaceae	g__Sphingomonas	g__Sphingomonas	0	0	0	1	0	7	0	0	0	0	1	0	0	0	88	0	1	0	4	0	0	0	0	0	0	0	0	0	0	0	0	0	2	0	0	0	0	0	0	0	0	0
3a0e45792d2543ada5dd2ce1d1469135_rep;size=292;	k__Bacteria	p__Firmicutes	c__Clostridia	o__Clostridiales	f__Clostridiaceae 1	g__Clostridium sensu stricto 13	Ambiguous_taxa	0	0	0	0	0	2	0	2	42	0	1	0	0	0	0	0	0	0	0	2	1	0	0	0	1	0	0	4	0	9	1	0	0	33	0	0	0	0	0	0	1	0
193422c6d8bdd172b35083768f877ee1_rep;size=292;	k__Bacteria	p__Bacteroidetes	c__Bacteroidia	o__Flavobacteriales	f__Weeksellaceae	g__Chryseobacterium	g__Chryseobacterium	0	0	0	1	0	4	1	0	0	0	0	0	36	0	0	0	1	1	0	0	0	0	11	1	0	0	0	0	0	0	0	0	0	0	0	0	0	5	0	0	3	0
e0f87f3c91ed66f0fab6a243bb039e46_rep;size=292;	Unassigned	Unassigned	Unassigned	Unassigned	Unassigned	Unassigned	Unassigned	2	1	0	2	0	0	0	2	0	0	0	0	0	0	0	0	1	0	0	0	0	1	1	0	0	1	0	5	4	0	0	2	3	0	9	2	23	0	0	1	0	0
c2807e2bc3a2f51f00bcf30080fe2da6_rep;size=292;	k__Bacteria	p__Proteobacteria	c__Alphaproteobacteria	o__Caulobacterales	f__Caulobacteraceae	g__Brevundimonas	g__Brevundimonas	0	2	0	2	0	39	0	1	0	0	1	0	0	0	0	0	37	0	0	0	14	1	0	2	1	0	0	2	8	1	0	0	2	1	2	0	0	1	0	0	0	0
7c05c7a6b0958361c1f6cb8b840bfe22_rep;size=291;	k__Bacteria	p__Proteobacteria	c__Alphaproteobacteria	o__Caulobacterales	f__Caulobacteraceae	g__Brevundimonas	Ambiguous_taxa	0	9	0	0	0	2	0	0	2	0	0	0	0	0	0	0	13	0	0	3	0	4	0	2	0	0	0	0	80	0	0	0	0	0	0	0	0	0	3	0	0	0
6ac4d404b574de4ab06712bb38b6e859_rep;size=291;	k__Bacteria	p__Bacteroidetes	c__Bacteroidia	o__Flavobacteriales	f__Weeksellaceae	g__Chryseobacterium	g__Chryseobacterium	3	0	0	4	1	0	0	1	0	0	0	0	0	0	0	0	0	4	0	0	0	0	4	0	2	15	0	2	1	0	0	0	3	0	28	2	1	2	0	0	0	0
c13226ffbe1f70b545c4dac984e3b13f_rep;size=290;	k__Bacteria	p__Firmicutes	c__Bacilli	o__Lactobacillales	f__Lactobacillaceae	g__Lactobacillus	Ambiguous_taxa	0	0	1	0	2	0	0	1	17	0	0	26	0	1	0	0	0	0	0	0	0	5	0	0	1	0	0	0	0	2	0	0	0	0	0	8	1	0	3	1	0	8
001935410b33e5c291c79b2b5ef43e6e_rep;size=290;	k__Bacteria	p__Bacteroidetes	c__Bacteroidia	o__Flavobacteriales	f__Weeksellaceae	g__Chryseobacterium	Ambiguous_taxa	1	0	1	2	0	1	0	0	0	0	1	2	0	0	0	0	3	5	0	0	1	0	7	2	0	7	1	0	7	0	1	0	1	2	26	1	0	3	8	0	0	0
1265935736d37e40ea79fa4e33c1dee5_rep;size=290;	k__Bacteria	p__Firmicutes	c__Bacilli	o__Lactobacillales	f__Enterococcaceae	g__Enterococcus	g__Enterococcus	0	0	0	0	0	0	1	0	0	0	0	0	0	0	0	0	0	0	0	0	0	0	0	0	0	0	0	0	0	1	0	1	0	0	0	0	0	0	0	0	0	6
222cf27047aa6230e3a67979ef4b8704_rep;size=290;	k__Bacteria	p__Actinobacteria	c__Actinobacteria	o__Micrococcales	f__Beutenbergiaceae	g__metagenome	s__metagenome	16	0	6	5	0	1	0	5	0	0	1	10	2	0	0	0	0	5	0	0	1	10	1	5	2	0	19	3	1	0	4	1	1	0	2	3	5	1	1	0	2	12
18d7a8f7f110f5be05048f8f0ca6c104_rep;size=290;	k__Bacteria	p__Proteobacteria	c__Alphaproteobacteria	o__Sphingomonadales	f__Sphingomonadaceae	g__Sphingomonas	Ambiguous_taxa	0	0	0	0	0	9	0	0	0	2	6	0	0	0	188	0	0	0	2	0	2	0	0	0	0	0	0	0	0	0	0	0	0	0	0	0	0	1	0	0	0	0
2595aef519dc835ed30579d19b8bfcd6_rep;size=290;	k__Bacteria	p__Actinobacteria	c__Actinobacteria	o__Micrococcales	f__Micrococcaceae	g__Kocuria	g__Kocuria	0	0	4	2	0	0	2	6	0	0	0	7	0	2	0	1	0	2	0	0	0	4	0	0	0	4	10	0	4	0	0	0	0	0	5	4	0	2	0	0	6	8
5de882ab095ff60db59189878bead435_rep;size=289;	k__Bacteria	p__Firmicutes	c__Negativicutes	o__Selenomonadales	f__Veillonellaceae	g__Pelosinus	s__uncultured bacterium	0	0	0	0	1	0	0	0	3	0	0	0	0	0	0	0	0	0	2	237	1	0	0	0	1	0	0	0	0	2	0	0	1	4	0	0	0	0	2	0	0	0
df5fd391b960457ee6cf1d4333a4bed6_rep;size=289;	Unassigned	Unassigned	Unassigned	Unassigned	Unassigned	Unassigned	Unassigned	0	0	0	0	0	0	0	0	0	0	0	0	0	0	0	0	0	0	0	0	0	0	0	0	0	0	0	0	0	0	0	0	0	0	0	0	0	0	0	0	0	0
813decfe20522607cf1bac7b7b35f796_rep;size=289;	Unassigned	Unassigned	Unassigned	Unassigned	Unassigned	Unassigned	Unassigned	0	0	0	1	1	0	0	0	0	0	0	0	0	3	0	29	0	3	0	0	0	6	1	0	2	4	6	6	3	0	1	0	2	0	3	7	0	0	0	12	2	4
82a701d0da38aa21a24a178231ad97b2_rep;size=289;	Unassigned	Unassigned	Unassigned	Unassigned	Unassigned	Unassigned	Unassigned	7	4	0	0	0	8	0	0	0	0	3	0	0	0	0	0	24	0	0	0	6	0	0	12	3	0	0	0	16	0	1	1	2	0	1	1	8	0	3	0	0	0
c89c12ac6d3bd8a465c19106944fdf0e_rep;size=288;	k__Bacteria	p__Proteobacteria	c__Alphaproteobacteria	o__Acetobacterales	f__Acetobacteraceae	f__Acetobacteraceae	f__Acetobacteraceae	0	0	0	0	0	0	0	0	0	1	0	0	0	0	0	0	0	3	0	0	0	0	0	0	0	0	0	4	6	0	0	0	0	0	5	0	0	48	0	0	2	0
dc6aed62d48c1863cf95bfc60d58b858_rep;size=288;	k__Bacteria	p__Actinobacteria	c__Actinobacteria	o__Pseudonocardiales	f__Pseudonocardiaceae	g__Pseudonocardia	s__uncultured bacterium	0	0	0	1	20	1	2	0	0	0	0	4	0	2	1	0	0	4	1	0	0	0	2	0	2	2	0	0	1	0	1	0	2	1	0	15	0	0	6	0	0	1
869c526e5a97208c2cbf320ecf8c5845_rep;size=288;	k__Bacteria	p__Actinobacteria	c__Actinobacteria	o__Micrococcales	f__Micrococcaceae	g__Kocuria	g__Kocuria	0	0	22	0	0	0	0	3	0	0	0	7	1	2	0	2	1	4	0	0	0	23	1	3	1	0	43	0	0	1	5	0	1	0	3	0	4	0	0	0	2	2
e3a271d8487e3ed25143967a1a999823_rep;size=288;	k__Bacteria	p__Firmicutes	c__Bacilli	o__Bacillales	f__Paenibacillaceae	g__Paenibacillus	g__Paenibacillus	0	7	0	0	1	0	0	0	1	0	0	1	0	1	0	1	0	0	0	90	1	0	0	0	0	0	0	0	0	13	1	0	0	76	0	0	0	0	0	0	0	0
5522512113d1ab589ad55cc72299c2f5_rep;size=287;	Unassigned	Unassigned	Unassigned	Unassigned	Unassigned	Unassigned	Unassigned	23	0	0	3	0	0	1	1	0	0	1	0	2	0	0	5	3	0	1	0	0	2	2	1	1	0	1	9	10	0	3	3	1	0	2	17	6	0	0	3	1	0
45c8de4fbbb37ac40ad21b7f3f3651d1_rep;size=287;	Unassigned	Unassigned	Unassigned	Unassigned	Unassigned	Unassigned	Unassigned	0	25	0	1	0	0	0	0	0	0	0	0	0	0	0	0	0	0	0	0	0	0	0	0	1	0	0	0	14	0	1	2	0	0	0	0	0	0	1	0	0	0
d74be4db20ddf979eb0aea804a6595b0_rep;size=287;	Unassigned	Unassigned	Unassigned	Unassigned	Unassigned	Unassigned	Unassigned	0	0	0	0	0	0	0	0	0	0	0	0	0	0	0	4	0	0	198	0	0	0	0	0	0	0	0	0	0	0	0	0	1	0	0	2	0	0	0	1	0	0
3c7035a92b9ee01a4969bf5b15638c79_rep;size=287;	k__Bacteria	p__Actinobacteria	c__Actinobacteria	o__Micrococcales	f__Micrococcaceae	f__Micrococcaceae	f__Micrococcaceae	8	3	0	4	0	0	0	2	1	0	0	6	0	1	0	2	2	7	0	0	0	4	10	1	2	10	0	1	6	0	7	0	2	0	4	2	2	3	0	1	2	3
01ded734321457aa62892105c766599c_rep;size=285;	k__Bacteria	p__Bacteroidetes	c__Bacteroidia	o__Cytophagales	f__Hymenobacteraceae	g__Hymenobacter	g__Hymenobacter	0	0	0	0	0	175	0	0	5	20	0	0	0	0	0	0	0	0	1	0	0	0	0	0	0	0	0	0	0	0	0	0	0	0	0	0	0	11	0	0	0	0
715a020bf455ef285a87cc1b2dc14f2d_rep;size=285;	k__Bacteria	p__Actinobacteria	c__Actinobacteria	o__Micrococcales	o__Micrococcales	o__Micrococcales	o__Micrococcales	0	0	1	0	3	4	0	1	0	0	0	41	0	1	0	0	0	1	0	1	0	1	0	0	1	1	3	3	4	0	24	0	0	2	2	10	2	3	3	0	0	2
d0a9d7069c8771413694de5dbc89951f_rep;size=285;	Unassigned	Unassigned	Unassigned	Unassigned	Unassigned	Unassigned	Unassigned	0	0	0	0	0	0	0	0	0	0	0	0	0	0	0	0	0	0	0	0	0	0	0	0	0	0	0	0	0	0	0	0	0	0	0	0	0	0	0	0	0	0
043d14ffb4088814989faf246e644925_rep;size=285;	k__Bacteria	p__Proteobacteria	c__Alphaproteobacteria	o__Rhodobacterales	f__Rhodobacteraceae	f__Rhodobacteraceae	f__Rhodobacteraceae	2	0	5	0	0	0	2	14	0	0	0	0	0	0	0	6	0	3	0	0	0	0	0	1	0	0	8	3	7	0	24	7	0	0	1	45	0	0	1	19	0	10
6699ea6b1a1d2a3b749b71e8adf54a28_rep;size=284;	Unassigned	Unassigned	Unassigned	Unassigned	Unassigned	Unassigned	Unassigned	1	3	2	6	0	8	0	0	0	0	0	0	3	0	0	0	33	0	0	5	78	0	0	3	1	0	0	0	4	0	0	3	1	0	0	2	0	0	0	0	1	0
32eba4c35817fb38fb772eab74979560_rep;size=284;	Unassigned	Unassigned	Unassigned	Unassigned	Unassigned	Unassigned	Unassigned	3	0	0	0	0	0	0	0	1	0	1	0	0	0	0	6	0	0	3	0	0	0	0	0	0	0	0	1	8	0	1	0	0	0	1	0	0	0	0	9	0	0
d9ffc2cf4b079e82cafba4bf81e37b09_rep;size=283;	k__Bacteria	p__Bacteroidetes	c__Bacteroidia	o__Sphingobacteriales	f__Sphingobacteriaceae	g__Pedobacter	Ambiguous_taxa	0	11	0	0	0	0	0	0	1	0	0	1	0	0	0	0	13	0	0	0	0	0	1	0	0	0	0	0	0	0	0	0	0	0	0	0	0	0	183	0	0	1
2b3807b6fd4143622a15dc5c4ef9629a_rep;size=283;	k__Bacteria	p__Proteobacteria	c__Alphaproteobacteria	o__Sphingomonadales	f__Sphingomonadaceae	g__Altererythrobacter	Ambiguous_taxa	1	0	0	0	0	0	0	0	1	0	1	0	0	0	0	1	0	0	3	0	12	0	0	0	1	0	0	4	1	0	0	0	3	0	2	5	11	0	1	0	0	0
118cf16ac2a01f4bdcad4d6ff1f7363f_rep;size=282;	k__Bacteria	p__Proteobacteria	c__Alphaproteobacteria	o__Sphingomonadales	f__Sphingomonadaceae	g__Novosphingobium	g__Novosphingobium	0	0	0	1	0	0	0	0	0	0	0	0	0	0	0	0	1	0	0	0	8	0	0	185	2	0	0	0	0	0	0	0	0	0	0	0	0	0	0	0	0	0
4874c8b91371d5907efb8a2d22991bd3_rep;size=282;	k__Bacteria	p__Bacteroidetes	c__Bacteroidia	o__Cytophagales	f__Spirosomaceae	g__Dyadobacter	g__Dyadobacter	0	75	0	1	3	8	0	0	0	0	1	3	0	0	0	0	2	0	0	23	2	4	0	1	0	0	0	0	0	5	0	0	0	0	0	0	1	0	3	0	0	0
ff5475f60a47d61e748ff21935186887_rep;size=282;	Unassigned	Unassigned	Unassigned	Unassigned	Unassigned	Unassigned	Unassigned	3	1	0	3	0	13	0	2	0	0	0	0	0	0	34	0	1	0	5	0	4	0	0	1	2	0	0	1	2	1	0	0	0	1	1	0	2	0	0	0	0	0
ed636a87e821a88d9ede55b620c621f4_rep;size=281;	k__Bacteria	p__Proteobacteria	c__Alphaproteobacteria	o__Sphingomonadales	f__Sphingomonadaceae	g__Sphingomonas	g__Sphingomonas	1	2	0	1	0	0	0	0	1	0	11	0	0	0	0	0	14	0	1	0	42	0	3	0	8	0	0	6	2	0	0	0	3	0	1	0	2	0	0	1	0	1
8d136f7d4a587c268ae0fccb3cbf6b59_rep;size=281;	k__Bacteria	p__Actinobacteria	c__Actinobacteria	o__Micrococcales	f__Dermabacteraceae	g__Brachybacterium	Ambiguous_taxa	0	0	0	0	1	0	9	0	1	0	0	2	0	7	0	2	0	7	0	0	0	0	2	0	0	6	1	0	2	17	0	0	0	19	1	0	0	0	1	0	2	10
b9a8cbc596da08fbdc5bbc220ea0ecb2_rep;size=281;	k__Bacteria	p__Actinobacteria	c__Actinobacteria	o__Micrococcales	f__Dermabacteraceae	g__Brachybacterium	Ambiguous_taxa	5	0	1	0	0	0	0	9	0	0	1	5	0	8	0	6	0	8	0	0	1	5	1	0	0	1	6	6	2	0	1	0	4	0	1	2	2	1	1	10	11	5
0eccb3d05ce3dac96d24ab83972988c3_rep;size=280;	k__Bacteria	p__Proteobacteria	c__Alphaproteobacteria	o__Rhizobiales	f__Xanthobacteraceae	f__Xanthobacteraceae	f__Xanthobacteraceae	0	231	0	0	0	0	0	0	0	0	0	1	0	0	0	0	0	0	0	2	0	0	0	0	0	0	0	0	4	0	0	2	0	0	0	0	0	0	0	0	0	0
641e2ab5ce8e333b0f2b4144b04721c8_rep;size=280;	Unassigned	Unassigned	Unassigned	Unassigned	Unassigned	Unassigned	Unassigned	5	0	0	0	0	0	0	2	1	0	0	0	0	1	0	1	0	1	1	0	0	0	0	1	1	0	0	15	5	0	4	3	1	0	0	1	10	0	0	12	1	0
9329addbdf02487537d12fb133af53b2_rep;size=279;	Unassigned	Unassigned	Unassigned	Unassigned	Unassigned	Unassigned	Unassigned	0	0	0	0	0	0	0	0	1	0	0	1	0	0	0	0	0	0	1	0	3	0	0	0	0	0	0	0	0	11	0	0	0	0	0	0	0	0	1	0	0	0
76cd207d08955bc9a2cbd898e31614ac_rep;size=279;	Unassigned	Unassigned	Unassigned	Unassigned	Unassigned	Unassigned	Unassigned	0	1	34	0	0	0	0	20	0	0	0	16	0	0	0	0	1	6	0	0	0	20	0	2	0	0	72	0	1	0	4	1	0	0	1	2	0	1	1	1	3	17
30323778c890ecb1e9a989758861c7e0_rep;size=279;	Unassigned	Unassigned	Unassigned	Unassigned	Unassigned	Unassigned	Unassigned	2	0	0	2	0	0	6	0	0	1	0	0	0	0	0	2	0	1	2	0	1	0	0	0	4	0	0	3	1	0	0	0	8	0	0	13	2	0	0	3	0	1
7f819317553b6623a8877cf4ec42d6e1_rep;size=279;	Unassigned	Unassigned	Unassigned	Unassigned	Unassigned	Unassigned	Unassigned	6	0	0	3	0	1	0	0	0	0	1	0	25	0	0	0	1	0	0	0	0	0	6	45	0	0	0	2	0	0	10	0	2	0	0	0	0	0	0	0	14	0
ddb18c84518bf631d80f1255fce51f7c_rep;size=278;	k__Bacteria	p__Actinobacteria	c__Actinobacteria	o__Micrococcales	f__Microbacteriaceae	f__Microbacteriaceae	f__Microbacteriaceae	0	0	0	0	0	0	0	0	0	0	0	0	0	0	0	0	0	0	0	0	0	0	0	0	0	0	0	0	3	0	0	0	0	0	2	64	0	0	0	0	0	0
b1f7270c27c559ff212d2c8dbb4984f2_rep;size=278;	k__Bacteria	p__Actinobacteria	c__Actinobacteria	o__Micrococcales	f__Microbacteriaceae	f__Microbacteriaceae	f__Microbacteriaceae	0	2	0	6	0	0	0	0	0	0	78	0	0	0	0	0	0	0	3	0	6	0	0	0	0	0	0	0	1	0	0	0	0	0	0	2	0	0	0	0	0	0
cf0c6ab7e6128ec98e88f421ad032e6e_rep;size=278;	k__Bacteria	p__Proteobacteria	c__Gammaproteobacteria	o__Betaproteobacteriales	f__Burkholderiaceae	g__Massilia	s__uncultured bacterium	1	0	0	0	0	3	0	0	0	0	2	0	0	0	0	0	7	0	17	0	11	0	0	0	0	0	0	1	0	0	0	0	8	0	0	1	3	0	1	4	0	0
2a2ae6e4e02972deb8fb5f5b95577d4a_rep;size=277;	k__Bacteria	p__Actinobacteria	c__Actinobacteria	o__Kineosporiales	f__Kineosporiaceae	g__Kineococcus	Ambiguous_taxa	0	0	0	0	0	0	0	3	0	0	0	4	0	6	0	3	0	6	0	0	0	0	0	0	0	106	1	2	2	0	0	0	0	0	23	6	4	1	0	3	3	2
0511e42787955542ed618a30b1fd6c6a_rep;size=277;	k__Bacteria	p__Proteobacteria	c__Gammaproteobacteria	o__Betaproteobacteriales	f__Burkholderiaceae	g__Massilia	g__Massilia	1	0	0	12	1	1	1	0	0	2	0	1	0	6	0	29	29	0	6	0	0	0	0	1	0	0	0	0	3	0	0	0	2	0	0	0	1	1	1	0	0	1
30a963f2181eb6990bfc1375b8691e22_rep;size=277;	k__Bacteria	p__Actinobacteria	c__Actinobacteria	o__Micrococcales	f__Micrococcaceae	g__Kocuria	Ambiguous_taxa	0	0	17	0	0	0	0	8	0	0	0	28	1	1	0	0	4	4	0	0	0	49	0	1	0	0	76	0	0	0	0	0	0	0	0	2	0	0	0	0	0	21
cd9c3f9878737a752b63c8b3bb1da7a4_rep;size=277;	k__Bacteria	p__Proteobacteria	c__Alphaproteobacteria	o__Sphingomonadales	f__Sphingomonadaceae	g__Sphingomonas	g__Sphingomonas	14	0	0	0	0	2	0	0	0	2	2	0	0	0	0	4	1	0	1	0	3	0	0	0	3	0	0	2	0	0	1	0	4	0	0	0	0	0	0	5	0	0
2c8d5bbb00dc4a7654b0e0e045d806f2_rep;size=276;	k__Bacteria	p__Proteobacteria	c__Alphaproteobacteria	o__Sphingomonadales	f__Sphingomonadaceae	g__Novosphingobium	Ambiguous_taxa	0	13	0	3	0	0	0	0	0	0	0	0	0	0	0	0	0	0	0	51	4	0	0	0	0	0	0	0	0	2	1	0	0	1	0	0	0	0	0	0	0	0
43e71aec411f22ce4d565afb998638ff_rep;size=276;	k__Bacteria	p__Deinococcus-Thermus	c__Deinococci	o__Deinococcales	f__Deinococcaceae	g__Deinococcus	g__Deinococcus	0	0	0	1	0	0	1	0	11	2	0	0	0	0	0	3	0	0	107	0	0	0	0	0	0	0	0	1	0	0	0	0	2	0	0	2	1	0	0	1	0	1
03408e51cc95f3581663c864880a99d3_rep;size=276;	k__Bacteria	p__Proteobacteria	c__Alphaproteobacteria	o__Caulobacterales	f__Caulobacteraceae	g__Brevundimonas	Ambiguous_taxa	1	13	0	1	0	7	0	0	0	0	1	0	1	0	0	0	4	0	0	3	2	0	0	0	2	0	0	0	4	1	0	0	0	0	0	2	0	0	0	0	0	0
5390ff2ead91bc00fb3be648610003fc_rep;size=276;	Unassigned	Unassigned	Unassigned	Unassigned	Unassigned	Unassigned	Unassigned	0	0	0	1	0	6	0	0	0	192	0	0	0	0	0	0	0	0	1	2	1	0	0	0	0	0	0	0	0	0	0	0	0	0	0	0	0	0	1	0	0	0
c8c72eb3c8e43f810cafcc1631b3d4d6_rep;size=276;	k__Bacteria	p__Actinobacteria	c__Actinobacteria	o__Micrococcales	f__Cellulomonadaceae	Ambiguous_taxa	Ambiguous_taxa	18	0	0	0	0	0	0	0	0	0	0	0	0	4	0	3	0	0	0	0	0	0	0	0	2	4	2	6	1	0	6	0	3	0	6	5	1	0	0	1	0	0
cda30eecbe1393781ad9eafbf506805d_rep;size=275;	k__Bacteria	p__Proteobacteria	c__Alphaproteobacteria	o__Caulobacterales	f__Caulobacteraceae	g__Brevundimonas	g__Brevundimonas	9	1	0	4	0	10	0	0	6	0	2	0	6	0	4	0	8	0	3	0	3	0	0	2	1	2	1	0	7	0	0	2	0	1	2	2	0	0	0	0	1	0
31f5528a1e211f5b203db4827adbd689_rep;size=275;	Unassigned	Unassigned	Unassigned	Unassigned	Unassigned	Unassigned	Unassigned	0	2	0	0	0	1	0	0	0	0	0	0	0	0	3	1	4	0	1	0	0	0	0	0	1	0	0	0	10	0	2	0	0	0	1	4	0	0	0	0	2	0
2743f799c4a93f761319ee63adc9aea5_rep;size=275;	k__Bacteria	p__Actinobacteria	c__Actinobacteria	o__Micrococcales	f__Cellulomonadaceae	Ambiguous_taxa	Ambiguous_taxa	2	0	0	0	1	0	3	1	0	0	0	0	0	0	0	0	0	0	0	0	1	0	2	0	0	1	1	6	0	0	1	0	2	0	2	2	6	0	0	1	2	0
be44d978acc680bbd78170901a5b31eb_rep;size=274;	k__Bacteria	p__Actinobacteria	c__Actinobacteria	o__Micrococcales	f__Microbacteriaceae	g__Microbacterium	g__Microbacterium	0	1	1	0	2	0	2	4	0	0	0	18	0	11	0	0	0	16	0	0	0	2	5	2	0	3	4	1	7	14	0	0	1	1	10	4	0	9	0	2	0	0
7e1cdb926315544d64c88d8064c1d1e9_rep;size=274;	Unassigned	Unassigned	Unassigned	Unassigned	Unassigned	Unassigned	Unassigned	0	2	0	0	0	0	0	0	0	0	0	0	0	0	0	0	0	0	0	0	0	0	0	0	1	0	0	0	16	0	0	0	0	0	0	0	0	0	0	0	0	0
20cac722e4c79ef8e001ba1a17ef9533_rep;size=274;	k__Bacteria	p__Actinobacteria	c__Actinobacteria	o__Corynebacteriales	f__Corynebacteriaceae	g__Corynebacterium 1	s__uncultured bacterium	0	0	0	1	2	0	0	0	0	0	0	2	0	4	0	0	0	6	0	0	0	0	0	0	0	0	0	0	2	0	0	0	0	0	0	0	0	0	0	0	1	0
ca9d47861823be3e45cefa179f4d4d53_rep;size=274;	k__Bacteria	p__Proteobacteria	c__Alphaproteobacteria	o__Rhizobiales	f__Beijerinckiaceae	g__Methylobacterium	Ambiguous_taxa	0	0	0	0	0	8	0	0	0	0	1	0	0	0	16	0	0	0	4	15	4	0	0	0	0	0	0	0	0	0	0	0	0	0	0	0	0	0	0	0	0	0
3a1e1e5554e4f1318a19d2cc0290678e_rep;size=274;	Unassigned	Unassigned	Unassigned	Unassigned	Unassigned	Unassigned	Unassigned	5	0	0	0	0	0	0	1	0	0	0	0	0	0	0	3	1	0	0	0	1	0	1	0	0	0	0	6	1	0	0	0	1	0	1	2	6	0	0	0	0	0
9c06e981d91ca08c71dd35464210206c_rep;size=274;	Unassigned	Unassigned	Unassigned	Unassigned	Unassigned	Unassigned	Unassigned	6	0	2	0	0	0	0	3	0	0	0	7	1	5	0	0	0	9	0	0	0	0	2	0	1	27	0	0	2	0	1	0	1	2	12	4	4	16	2	0	5	1
ce02922c0724b0b420666893c07e3071_rep;size=273;	k__Bacteria	p__Proteobacteria	c__Alphaproteobacteria	o__Rhizobiales	f__Kaistiaceae	g__Kaistia	g__Kaistia	1	0	0	1	1	0	0	0	0	0	0	0	0	0	0	0	1	0	0	40	0	1	1	0	0	0	0	0	0	0	1	0	2	8	0	0	0	0	16	3	0	0
9cce057c75c4bf8792364e8776ec3161_rep;size=273;	k__Bacteria	p__Proteobacteria	c__Gammaproteobacteria	o__Betaproteobacteriales	f__Burkholderiaceae	g__Acidovorax	Ambiguous_taxa	0	0	1	3	0	0	0	2	3	0	0	1	0	0	0	3	5	0	1	16	0	8	2	0	0	0	0	13	1	2	0	0	1	2	0	1	6	0	2	4	1	1
e62224cd2a449ac4000c93cd084d6469_rep;size=273;	Unassigned	Unassigned	Unassigned	Unassigned	Unassigned	Unassigned	Unassigned	1	70	0	0	0	0	0	0	0	0	0	1	0	0	0	0	2	0	0	0	0	0	0	1	2	0	0	0	18	0	0	2	0	0	0	3	0	0	0	0	0	0
3db134dc66bbebdef58bb7893a3be147_rep;size=272;	k__Bacteria	p__Bacteroidetes	c__Bacteroidia	o__Cytophagales	f__MWH-CFBk5	g__uncultured Bacteroidetes bacterium	s__uncultured Bacteroidetes bacterium	0	15	0	0	0	0	0	0	0	0	0	0	0	0	0	0	0	0	0	180	0	0	0	0	0	1	0	0	0	0	5	1	0	0	0	0	0	0	0	0	0	0
ef7757f0562cd72f3ef56ad2cb799930_rep;size=271;	k__Bacteria	p__Actinobacteria	c__Actinobacteria	o__Micrococcales	f__Microbacteriaceae	f__Microbacteriaceae	f__Microbacteriaceae	35	0	0	0	0	1	0	0	0	3	1	1	6	0	0	0	1	2	1	0	0	0	0	3	3	0	3	8	0	3	0	8	1	0	0	0	12	0	2	0	1	2
8f577065a8d43b400bacd1dd992ccbd1_rep;size=271;	Unassigned	Unassigned	Unassigned	Unassigned	Unassigned	Unassigned	Unassigned	20	0	0	4	0	1	0	0	1	0	0	0	3	0	0	0	9	0	0	0	0	0	0	2	0	0	0	2	5	0	2	3	2	2	1	7	2	0	0	0	3	0
c2ed0f0c6b89a664e76b0978a684f356_rep;size=271;	k__Bacteria	p__Actinobacteria	c__Actinobacteria	o__Micrococcales	f__Micrococcaceae	f__Micrococcaceae	f__Micrococcaceae	0	0	13	0	0	0	8	16	0	0	0	17	0	3	0	0	0	3	0	0	0	45	0	0	0	1	44	0	4	7	4	0	0	1	0	1	0	2	0	0	10	10
9ec9dba7ff353a0e34c76939dc7996ee_rep;size=271;	k__Bacteria	p__Proteobacteria	c__Alphaproteobacteria	o__Caulobacterales	f__Caulobacteraceae	g__Brevundimonas	Ambiguous_taxa	3	1	0	0	0	2	0	0	1	0	0	0	0	0	0	0	0	0	0	2	5	2	0	1	1	0	0	0	11	0	0	3	1	1	0	0	0	0	0	1	0	0
6224cf211c5d9b275805ab2767cfab79_rep;size=270;	k__Bacteria	p__Actinobacteria	c__Actinobacteria	o__Micrococcales	f__Microbacteriaceae	f__Microbacteriaceae	f__Microbacteriaceae	0	0	0	0	0	0	0	0	0	0	0	2	0	0	0	0	0	1	0	0	0	0	0	0	1	3	0	0	0	0	0	0	0	0	0	0	0	18	0	0	0	0
8b067fc473f0c8f573d6765d2f32a663_rep;size=270;	Unassigned	Unassigned	Unassigned	Unassigned	Unassigned	Unassigned	Unassigned	8	0	0	2	0	0	1	0	0	0	0	0	0	0	0	0	3	0	0	0	1	4	1	1	4	0	1	2	7	0	0	0	5	2	1	1	4	0	0	3	2	1
adfab06678b417fdcfd5039e8eb11fdb_rep;size=270;	Unassigned	Unassigned	Unassigned	Unassigned	Unassigned	Unassigned	Unassigned	4	0	0	1	1	0	6	2	0	0	0	4	0	3	0	1	0	3	0	0	0	0	3	0	5	9	0	0	4	2	4	0	5	10	3	13	1	0	2	0	0	1
92f5084c5e3b21da382291f978228e67_rep;size=269;	k__Bacteria	p__Proteobacteria	c__Alphaproteobacteria	o__Acetobacterales	f__Acetobacteraceae	g__Craurococcus	s__uncultured bacterium	3	0	0	0	0	0	0	0	0	9	0	0	0	0	0	0	0	0	0	0	5	0	0	0	30	0	0	5	0	0	0	0	9	0	0	0	12	0	0	0	0	0
0e57943fa6c9a7567aee8b70ebc497f2_rep;size=269;	k__Bacteria	p__Proteobacteria	c__Alphaproteobacteria	o__Sphingomonadales	f__Sphingomonadaceae	g__Sphingobium	g__Sphingobium	0	3	0	0	0	0	0	0	0	0	0	0	0	0	0	0	0	0	0	0	0	0	0	0	0	0	0	0	0	0	0	0	0	0	0	0	0	0	0	0	0	0
eb7f66f54ddf40fb6457038f9d4877d2_rep;size=268;	k__Bacteria	p__Proteobacteria	c__Gammaproteobacteria	o__Enterobacteriales	f__Enterobacteriaceae	g__Klebsiella	g__Klebsiella	0	0	0	0	0	0	0	0	0	0	0	0	0	0	0	0	0	160	0	0	0	0	0	0	0	0	0	0	0	0	0	0	0	0	0	0	0	0	0	0	0	0
3df2c211c0aceb1c1d8a329f90873a4b_rep;size=268;	Unassigned	Unassigned	Unassigned	Unassigned	Unassigned	Unassigned	Unassigned	0	0	0	0	0	0	0	0	0	0	0	0	0	0	0	0	0	0	0	0	0	0	0	0	0	0	0	0	3	0	0	0	0	0	0	0	0	0	0	0	0	0
4748792e95f48254667d658287a281c4_rep;size=268;	k__Bacteria	p__Proteobacteria	c__Gammaproteobacteria	o__Betaproteobacteriales	f__Burkholderiaceae	g__Massilia	g__Massilia	0	0	0	0	0	3	0	0	0	2	0	0	0	1	0	6	0	2	0	0	0	1	1	2	0	0	1	1	1	0	0	3	3	0	0	0	0	0	0	2	0	0
8c9b0018d6e32881a203c640a606f2dd_rep;size=267;	k__Bacteria	p__Proteobacteria	c__Alphaproteobacteria	o__Acetobacterales	f__Acetobacteraceae	g__Roseomonas	g__Roseomonas	0	0	0	0	1	0	0	0	0	1	0	4	0	29	0	5	0	5	0	0	0	0	0	0	1	0	4	0	8	2	0	0	7	0	0	0	1	0	1	14	0	1
826ae2b57dbab5bb853fac0cef9d7a48_rep;size=267;	Unassigned	Unassigned	Unassigned	Unassigned	Unassigned	Unassigned	Unassigned	15	0	0	0	0	0	0	0	0	1	0	0	0	0	0	1	0	1	1	0	0	0	1	0	1	0	0	1	0	0	1	0	1	0	0	0	8	0	0	0	0	0
a26ca318de49d6bc4d3d877cdb982214_rep;size=267;	k__Bacteria	p__Proteobacteria	c__Alphaproteobacteria	o__Rhodobacterales	f__Rhodobacteraceae	g__Paracoccus	g__Paracoccus	3	0	4	0	0	0	1	2	0	0	0	0	4	0	0	8	16	1	0	0	0	16	1	1	1	0	3	2	7	0	2	4	3	0	1	24	7	0	1	13	1	1
6892ae7e46c009b43bec8a5512c93ae4_rep;size=266;	k__Bacteria	p__Proteobacteria	c__Alphaproteobacteria	o__Rhizobiales	f__Beijerinckiaceae	f__Beijerinckiaceae	f__Beijerinckiaceae	0	0	0	0	0	0	0	0	0	0	0	0	0	0	0	0	0	0	0	0	0	0	0	0	0	0	0	0	26	0	0	0	0	0	0	0	0	0	0	0	0	0
63f79eced4d4dd80df18a2e349f30497_rep;size=266;	k__Bacteria	p__Bacteroidetes	c__Bacteroidia	o__Flavobacteriales	f__Weeksellaceae	g__Chryseobacterium	Ambiguous_taxa	2	0	4	0	4	0	1	0	10	1	1	3	0	0	0	0	0	6	0	2	0	0	1	0	1	2	2	2	5	14	0	1	0	4	2	0	1	8	2	1	0	1
8d6450ad0d75dcd09e44ca9e3a27d8c0_rep;size=265;	k__Bacteria	p__Proteobacteria	c__Alphaproteobacteria	o__Rhodobacterales	f__Rhodobacteraceae	g__Amaricoccus	g__Amaricoccus	0	0	0	0	0	3	0	0	0	0	0	0	0	1	0	0	0	0	0	0	0	0	0	0	0	0	0	0	0	0	0	0	0	0	0	0	0	0	0	0	0	0
464afd1028bc79683f1ad605dbc67eb9_rep;size=265;	k__Bacteria	p__Proteobacteria	c__Alphaproteobacteria	o__Rhodobacterales	f__Rhodobacteraceae	g__Rubellimicrobium	s__uncultured bacterium	1	0	0	1	14	0	0	0	0	1	0	0	0	1	1	2	0	3	0	0	0	0	4	0	3	0	0	6	14	1	0	0	8	4	0	6	3	0	1	0	0	2
2648a99d65facc09fed5d9fecac794f2_rep;size=264;	Unassigned	Unassigned	Unassigned	Unassigned	Unassigned	Unassigned	Unassigned	0	0	0	0	7	0	4	2	0	0	0	12	0	10	0	4	0	8	0	0	0	0	2	1	1	2	0	3	3	0	0	0	0	0	5	1	2	5	0	2	1	3
96475714e61f09c54e1913417b9ea54d_rep;size=264;	Unassigned	Unassigned	Unassigned	Unassigned	Unassigned	Unassigned	Unassigned	2	0	0	2	0	0	0	0	0	0	4	0	0	0	0	23	0	0	2	0	1	0	1	0	2	0	0	2	1	0	0	0	8	1	1	1	0	0	0	3	0	0
b8de2a9254314ec22740fa2e064d8d1c_rep;size=263;	k__Bacteria	p__Proteobacteria	c__Alphaproteobacteria	o__Caulobacterales	f__Caulobacteraceae	g__Brevundimonas	g__Brevundimonas	3	1	0	1	0	2	2	0	0	0	0	0	1	0	2	1	21	0	0	0	4	0	0	1	0	0	0	1	9	0	1	0	1	0	0	0	1	0	0	1	1	0
5fa619cf18832292654fd8fb00797ceb_rep;size=262;	k__Bacteria	p__Proteobacteria	c__Alphaproteobacteria	o__Rhizobiales	f__Beijerinckiaceae	g__Methylobacterium	g__Methylobacterium	0	0	0	0	0	0	8	0	0	2	0	0	0	56	5	6	0	3	6	0	0	0	0	1	2	0	0	0	1	0	0	0	0	0	0	0	0	0	0	6	0	0
f891ffe52fd7840c43d0dc48be903006_rep;size=261;	k__Bacteria	p__Bacteroidetes	c__Bacteroidia	o__Flavobacteriales	f__Flavobacteriaceae	g__Flavobacterium	Ambiguous_taxa	0	34	2	0	0	0	1	1	1	0	0	5	0	0	0	0	3	1	0	8	0	1	0	0	0	0	1	0	0	1	0	3	0	67	0	0	0	0	1	0	0	0
2311c3c629b152a7c0d0174a0a886ebd_rep;size=261;	k__Bacteria	p__Actinobacteria	c__Actinobacteria	o__Propionibacteriales	f__Nocardioidaceae	g__Aeromicrobium	g__Aeromicrobium	0	0	0	0	1	0	6	0	0	0	0	0	0	0	0	1	1	0	2	0	0	0	0	0	1	1	0	0	0	84	0	0	0	40	0	18	0	0	10	0	0	0
d5336779b621b812f6f1b935e330962e_rep;size=261;	k__Bacteria	p__Bacteroidetes	c__Bacteroidia	o__Cytophagales	f__Microscillaceae	g__uncultured	s__uncultured Sphingobacteriales bacterium	0	120	0	0	0	0	0	0	2	0	1	0	0	0	0	0	0	0	0	0	0	0	0	0	0	0	0	0	0	3	0	0	0	3	0	0	0	0	0	0	0	0
a820109b1b2ed6e3f7ef7969e85edef1_rep;size=261;	k__Bacteria	p__Proteobacteria	c__Alphaproteobacteria	o__Sphingomonadales	f__Sphingomonadaceae	g__Sphingomonas	g__Sphingomonas	0	0	0	0	0	2	0	0	1	0	4	0	0	0	0	0	0	0	3	6	3	0	0	0	0	1	0	1	9	0	0	0	0	2	2	6	1	0	0	0	0	0
da1666dd55025af5bc780bb2ffede357_rep;size=261;	k__Bacteria	p__Proteobacteria	c__Alphaproteobacteria	o__Sphingomonadales	f__Sphingomonadaceae	f__Sphingomonadaceae	f__Sphingomonadaceae	1	1	0	4	0	0	0	0	0	0	5	0	0	0	1	2	2	0	0	12	118	0	1	0	0	0	0	1	1	0	0	0	1	0	0	0	0	0	0	1	0	0
8d443093a6ff269f78c26b58e676e88f_rep;size=261;	Unassigned	Unassigned	Unassigned	Unassigned	Unassigned	Unassigned	Unassigned	6	0	1	0	0	0	0	2	0	0	0	0	0	0	0	3	22	0	1	0	1	0	3	0	4	0	1	3	0	2	0	0	4	0	1	0	3	2	10	2	0	0
bf89f128004939c1f1ca02ee90141efc_rep;size=261;	Unassigned	Unassigned	Unassigned	Unassigned	Unassigned	Unassigned	Unassigned	3	0	5	0	1	0	0	6	0	0	0	5	0	14	0	0	0	9	0	0	0	0	1	0	1	17	9	0	7	0	3	0	0	0	17	2	1	8	1	1	4	5
d844d767ff1507f711fbfe9b780e9163_rep;size=261;	Unassigned	Unassigned	Unassigned	Unassigned	Unassigned	Unassigned	Unassigned	1	0	0	0	0	0	0	0	0	2	0	0	0	0	0	0	0	0	0	0	0	0	0	0	1	0	0	1	0	0	0	6	6	0	0	0	6	0	2	0	0	0
8b497f91df99572868e65f31f0747b90_rep;size=261;	k__Bacteria	p__Proteobacteria	c__Gammaproteobacteria	o__Betaproteobacteriales	f__Burkholderiaceae	g__Massilia	s__uncultured bacterium	0	2	2	0	3	0	2	2	0	0	0	0	0	11	0	19	5	1	6	2	0	1	0	0	0	0	2	8	3	0	1	0	3	0	0	0	1	0	3	29	0	2
b95915df3668e423db960f4d8be9339d_rep;size=260;	k__Bacteria	p__Actinobacteria	c__Actinobacteria	o__Micrococcales	f__Microbacteriaceae	f__Microbacteriaceae	f__Microbacteriaceae	2	0	0	1	0	1	0	0	1	0	16	0	0	0	0	1	0	0	10	0	46	0	1	0	2	0	0	2	3	0	0	0	3	0	0	0	3	0	0	0	0	0
fab182bf1477be57255c88979b969cda_rep;size=260;	k__Bacteria	p__Actinobacteria	c__Actinobacteria	o__Micrococcales	f__Microbacteriaceae	g__Curtobacterium	s__uncultured bacterium	13	0	4	1	1	0	0	1	0	0	0	9	30	1	0	1	1	13	0	0	0	10	0	3	0	3	8	5	1	0	2	0	1	2	0	2	1	5	2	0	3	5
a31da42c19c98a297675b4c1b10cac7a_rep;size=260;	k__Bacteria	p__Proteobacteria	c__Alphaproteobacteria	o__Sphingomonadales	f__Sphingomonadaceae	g__Sphingomonas	Ambiguous_taxa	0	0	1	0	0	15	0	0	0	1	8	0	0	0	1	1	0	0	3	3	36	0	0	0	0	0	0	0	0	0	0	0	0	0	0	3	0	0	0	0	0	0
9b3bafa4c3fdd0b914bb24ef51278de6_rep;size=260;	Unassigned	Unassigned	Unassigned	Unassigned	Unassigned	Unassigned	Unassigned	0	125	0	2	0	0	0	0	0	0	0	0	0	0	0	0	0	0	0	0	0	0	0	0	1	0	0	0	7	0	0	0	3	0	0	0	0	0	1	0	0	0
2d7c83bc735a7f51ca02bed6f4dbcca0_rep;size=260;	Unassigned	Unassigned	Unassigned	Unassigned	Unassigned	Unassigned	Unassigned	0	0	0	1	0	10	0	0	0	0	0	0	0	0	80	0	2	0	1	0	0	0	0	0	0	0	0	0	0	0	0	0	0	0	0	0	0	0	0	0	0	0
ca3d546d9a361e18de64f526c0d7d209_rep;size=259;	Unassigned	Unassigned	Unassigned	Unassigned	Unassigned	Unassigned	Unassigned	1	0	0	0	4	0	0	0	0	0	0	0	0	0	0	0	0	0	0	0	0	0	0	0	0	0	0	11	0	0	0	0	0	0	0	0	32	0	0	0	0	0
6a5ad69a3ee9a48a7b1696715207d83b_rep;size=259;	Unassigned	Unassigned	Unassigned	Unassigned	Unassigned	Unassigned	Unassigned	1	3	0	9	4	0	0	0	0	0	29	2	0	4	0	0	0	0	0	0	5	0	1	0	0	0	0	0	7	6	1	0	0	0	1	2	0	0	0	3	0	0
aa1d766614ae6eb4a3cdc9bd9fc9ac79_rep;size=259;	k__Bacteria	p__Proteobacteria	c__Alphaproteobacteria	o__Rhodobacterales	f__Rhodobacteraceae	g__Paracoccus	g__Paracoccus	0	0	0	0	0	0	136	0	0	0	0	0	0	0	0	0	0	0	0	0	0	0	0	0	0	0	0	0	0	0	0	0	0	0	0	37	2	0	0	0	0	0
36f13f98b6d0452fb3a59f979f081ea0_rep;size=259;	k__Bacteria	p__Proteobacteria	c__Alphaproteobacteria	o__Sphingomonadales	f__Sphingomonadaceae	g__Sphingomonas	Ambiguous_taxa	1	0	0	0	0	0	0	0	1	165	0	0	0	1	0	0	0	0	4	0	0	0	0	0	0	0	0	0	0	0	0	0	0	0	0	0	0	0	0	0	0	0
22f680b79ef0a79b91de0ed2fa1527f8_rep;size=258;	k__Bacteria	p__Proteobacteria	c__Alphaproteobacteria	o__Acetobacterales	f__Acetobacteraceae	f__Acetobacteraceae	f__Acetobacteraceae	0	0	0	0	0	0	0	0	0	0	0	0	0	0	0	0	0	0	0	0	0	0	0	0	0	0	0	3	0	0	0	0	0	0	0	0	0	0	0	0	0	0
755c13aed61e778e4ca4b61110decc2b_rep;size=258;	k__Bacteria	p__Proteobacteria	c__Alphaproteobacteria	o__Rhodobacterales	f__Rhodobacteraceae	g__Rubellimicrobium	g__Rubellimicrobium	0	0	0	3	21	0	7	3	3	1	0	3	0	9	0	1	0	4	0	0	0	1	1	3	11	1	0	1	13	3	0	0	0	2	3	5	0	0	0	1	0	3
b1db86e869b9530ff69dda73ff9684a3_rep;size=258;	k__Bacteria	p__Actinobacteria	c__Actinobacteria	o__Micrococcales	f__Microbacteriaceae	f__Microbacteriaceae	f__Microbacteriaceae	1	1	3	0	0	0	1	4	0	0	0	75	0	2	0	0	0	13	0	0	0	5	0	0	0	3	1	0	2	0	0	0	0	0	10	2	1	1	0	0	0	10
948494e11e91df99bc5c4f62399a4fca_rep;size=258;	Unassigned	Unassigned	Unassigned	Unassigned	Unassigned	Unassigned	Unassigned	0	0	9	1	0	0	1	16	0	0	0	2	0	1	0	1	1	1	0	0	0	12	1	0	0	1	9	6	1	0	0	0	0	0	1	1	1	3	0	0	5	19
146aa2e0de2935239ade342dedc42056_rep;size=258;	k__Bacteria	p__Proteobacteria	c__Alphaproteobacteria	o__Caulobacterales	f__Caulobacteraceae	g__Brevundimonas	g__Brevundimonas	0	0	0	0	0	3	0	0	0	0	0	0	0	0	0	0	0	0	0	0	0	0	0	0	0	0	0	0	0	3	0	0	0	0	0	1	0	0	0	0	0	0
6092f59253bb39e48297812254ec3928_rep;size=258;	k__Bacteria	p__Actinobacteria	c__Actinobacteria	o__Micrococcales	f__Dermatophilaceae	g__uncultured	s__uncultured bacterium	0	0	12	0	0	0	0	26	0	0	0	4	0	0	0	0	0	2	0	0	0	54	0	0	0	0	61	0	0	0	1	0	0	0	0	1	0	0	5	0	1	48
df0b0a76dafba7c09cb7f9fa9ec47d8b_rep;size=258;	k__Bacteria	p__Proteobacteria	c__Alphaproteobacteria	o__Sphingomonadales	f__Sphingomonadaceae	g__Sphingomonas	Ambiguous_taxa	5	0	0	1	0	0	1	1	0	0	0	0	0	0	0	7	1	0	0	0	0	0	0	0	0	0	1	8	1	0	1	1	2	0	1	2	12	0	0	12	0	0
3ee87a30de22b9c0ff1828711bb29078_rep;size=257;	k__Bacteria	p__Proteobacteria	c__Alphaproteobacteria	o__Sphingomonadales	f__Sphingomonadaceae	g__Sphingomonas	g__Sphingomonas	0	0	0	0	0	0	0	0	0	0	5	0	0	0	0	2	1	0	0	0	0	0	0	1	0	0	0	0	6	0	0	0	0	0	0	0	0	0	0	1	0	0
69d40bfd865458577ff35f67e5f43745_rep;size=257;	k__Bacteria	p__Proteobacteria	c__Alphaproteobacteria	o__Rhizobiales	f__Beijerinckiaceae	g__Methylobacterium	Ambiguous_taxa	0	0	0	0	0	42	0	0	3	0	1	0	0	0	36	0	0	0	15	4	9	0	0	0	1	0	0	0	0	0	0	0	0	0	0	0	0	0	0	0	0	0
8d0fa2271c01942e6d471d92dfa9fbd1_rep;size=257;	Unassigned	Unassigned	Unassigned	Unassigned	Unassigned	Unassigned	Unassigned	1	0	0	0	0	0	0	18	0	0	0	0	0	1	0	4	0	3	0	0	0	0	1	0	2	3	2	7	0	0	4	0	0	0	4	3	1	1	0	1	2	4
3c1300858836bff06d98e835ca29978f_rep;size=257;	k__Bacteria	p__Actinobacteria	c__Actinobacteria	o__Micrococcales	f__Beutenbergiaceae	g__metagenome	s__metagenome	8	0	0	0	0	0	2	4	0	0	0	2	0	7	0	5	2	12	0	0	0	1	10	0	4	1	3	4	8	0	3	1	0	1	5	3	2	0	2	6	6	2
a29162fb9bc24b1033c0b9f6b4814ae8_rep;size=256;	k__Bacteria	p__Bacteroidetes	c__Bacteroidia	o__Cytophagales	f__Microscillaceae	g__Flexibacter	g__Flexibacter	0	0	0	0	0	0	0	2	0	0	9	0	0	0	8	2	0	0	0	1	0	0	0	0	1	0	0	0	2	0	0	0	0	0	0	0	0	0	0	0	0	0
ecf3076de908a074ba3eb85932dce482_rep;size=256;	k__Bacteria	p__Proteobacteria	c__Alphaproteobacteria	o__Sphingomonadales	f__Sphingomonadaceae	g__Sphingobium	Ambiguous_taxa	0	0	0	0	0	0	0	0	0	0	0	0	0	0	0	0	0	1	1	86	0	0	0	0	0	0	0	1	0	31	0	0	0	40	0	0	0	0	0	0	0	0
90c1ae30dde9d7fd3c5ef60974e63108_rep;size=256;	k__Bacteria	p__Firmicutes	c__Bacilli	o__Lactobacillales	f__Leuconostocaceae	g__Leuconostoc	g__Leuconostoc	0	0	1	196	0	0	0	0	3	0	0	0	0	0	0	0	0	0	0	0	0	0	5	6	0	0	1	1	0	0	0	0	0	0	1	0	0	0	0	0	0	0
3ff3613d515ceb49f321c90c9a5f211c_rep;size=256;	k__Bacteria	p__Actinobacteria	c__Actinobacteria	o__Micrococcales	f__Micrococcaceae	f__Micrococcaceae	f__Micrococcaceae	0	0	0	0	0	0	1	0	0	0	0	0	0	4	0	3	0	1	0	0	0	0	0	0	2	0	0	0	3	3	0	0	1	4	0	12	0	0	0	6	0	0
d6ec5c75b2743dd7ba3bf06d3be5d717_rep;size=256;	Unassigned	Unassigned	Unassigned	Unassigned	Unassigned	Unassigned	Unassigned	0	0	0	1	0	0	0	0	0	0	1	0	0	0	0	5	0	0	4	1	2	0	0	0	1	0	0	0	1	0	0	0	0	2	0	0	0	0	0	1	1	0
fcd07c68555eddea2ceed3a8d935c929_rep;size=256;	Unassigned	Unassigned	Unassigned	Unassigned	Unassigned	Unassigned	Unassigned	1	0	0	1	0	0	2	0	0	0	0	0	0	2	0	5	0	1	0	0	0	0	2	1	1	0	0	0	3	0	1	6	6	0	1	0	13	0	7	2	1	0
f30490f2ed61c82a6f6ee4150c744ebc_rep;size=255;	k__Bacteria	p__Proteobacteria	c__Alphaproteobacteria	o__Caulobacterales	f__Caulobacteraceae	g__Brevundimonas	g__Brevundimonas	2	1	0	2	0	3	0	0	0	0	0	0	0	0	0	0	20	0	1	2	1	0	0	0	2	0	0	2	16	1	0	1	0	0	0	10	2	0	0	0	0	0
eaf6553cfeab29083dd40e68ade197c0_rep;size=255;	k__Bacteria	p__Actinobacteria	c__Actinobacteria	o__Micrococcales	o__Micrococcales	o__Micrococcales	o__Micrococcales	0	0	0	0	0	0	0	0	0	0	0	14	0	0	0	0	0	0	0	2	0	0	0	0	0	0	0	0	0	1	2	0	0	0	0	0	0	0	19	0	0	0
679f6c9eb23af72163610b5b89f62b01_rep;size=255;	k__Bacteria	p__Proteobacteria	c__Alphaproteobacteria	o__Rhodobacterales	f__Rhodobacteraceae	g__Paracoccus	g__Paracoccus	3	0	2	2	0	0	1	4	0	0	0	0	0	1	0	1	0	1	0	0	0	8	0	0	1	0	6	6	1	0	0	0	0	0	5	14	5	0	0	7	0	4
86f381c4832e0c429e77e457d7177718_rep;size=254;	k__Bacteria	p__Proteobacteria	c__Alphaproteobacteria	o__Rhizobiales	f__Devosiaceae	g__Devosia	g__Devosia	0	0	7	0	2	0	1	2	0	0	0	1	0	0	0	0	0	1	0	3	0	66	1	0	0	0	1	0	0	0	2	3	0	1	0	7	1	0	0	5	0	8
08b463d972442c0089aa3bd6a2b96d63_rep;size=254;	k__Bacteria	p__Proteobacteria	c__Alphaproteobacteria	o__Acetobacterales	f__Acetobacteraceae	g__Gluconobacter	g__Gluconobacter	0	0	0	0	0	0	0	0	0	0	0	0	0	0	0	0	0	0	0	0	0	0	0	0	0	0	0	0	0	0	0	0	0	0	0	0	0	0	0	0	0	0
ee7d81721a1d224d7c9459a03f67eabf_rep;size=254;	k__Bacteria	p__Proteobacteria	c__Alphaproteobacteria	o__Rhizobiales	f__Beijerinckiaceae	g__alphaI cluster	Ambiguous_taxa	0	1	0	0	0	1	0	0	0	0	0	0	0	0	0	0	0	0	0	0	0	0	0	0	0	0	0	0	10	0	0	0	0	0	0	0	0	0	0	0	0	0
0e18bc648bab9dd23f8f7032b99353c9_rep;size=254;	Unassigned	Unassigned	Unassigned	Unassigned	Unassigned	Unassigned	Unassigned	12	0	0	0	0	1	0	1	0	0	0	0	0	0	0	1	0	0	0	0	0	0	0	0	2	0	0	3	0	0	0	0	0	0	1	0	3	0	0	1	0	0
38b7c7ea5a37ba7d928b71dd82e0d912_rep;size=254;	k__Bacteria	p__Actinobacteria	c__Actinobacteria	o__Micrococcales	f__Micrococcaceae	f__Micrococcaceae	f__Micrococcaceae	3	0	0	0	0	0	1	12	0	0	0	1	0	9	0	9	1	2	0	0	0	1	6	0	1	4	0	2	2	0	3	0	3	0	2	0	0	3	0	10	12	6
15b64f8d8a6e24444d7cc5cbaac4729c_rep;size=254;	k__Bacteria	p__Bacteroidetes	c__Bacteroidia	o__Flavobacteriales	f__Weeksellaceae	g__Chryseobacterium	g__Chryseobacterium	0	0	0	0	4	0	0	0	0	0	0	0	0	0	0	0	0	3	0	0	0	0	1	0	0	14	0	8	1	0	0	0	1	0	10	1	2	3	2	0	2	0
da735968b066e4683c77c03bcd50baf3_rep;size=253;	k__Bacteria	p__Bacteroidetes	c__Bacteroidia	o__Cytophagales	f__Spirosomaceae	g__Spirosoma	g__Spirosoma	0	0	0	0	0	14	0	0	0	5	0	0	0	0	0	0	0	0	0	0	0	0	0	0	0	0	1	0	0	0	0	0	0	0	0	0	0	0	0	0	0	0
6b54d63098e55db29be0b032b6564120_rep;size=253;	k__Bacteria	p__Proteobacteria	c__Alphaproteobacteria	o__Sphingomonadales	f__Sphingomonadaceae	g__Sphingomonas	g__Sphingomonas	2	0	0	0	0	0	0	2	0	2	0	0	0	7	0	8	0	0	0	0	2	0	0	0	3	1	0	2	1	3	0	0	5	0	0	0	4	0	1	4	0	0
71281fdf07420c7dabcc255c129c1cdb_rep;size=253;	k__Bacteria	p__Proteobacteria	c__Alphaproteobacteria	o__Rhizobiales	f__Beijerinckiaceae	g__Methylobacterium	Ambiguous_taxa	0	0	0	1	0	2	0	0	17	1	79	0	0	0	0	0	0	0	35	0	23	0	0	0	4	0	0	0	2	0	0	0	2	0	0	0	0	0	0	0	0	0
277b8601df654adc39f73c3c81b1203c_rep;size=253;	k__Bacteria	p__Proteobacteria	c__Alphaproteobacteria	o__Rhizobiales	f__Beijerinckiaceae	g__Methylobacterium	Ambiguous_taxa	0	0	0	0	0	6	0	0	0	1	1	0	0	0	28	0	0	0	2	5	0	0	0	0	0	0	0	0	0	0	0	0	0	2	0	0	0	0	0	0	0	0
ca30562ef4f06b22d9e3cd7b041610aa_rep;size=253;	Unassigned	Unassigned	Unassigned	Unassigned	Unassigned	Unassigned	Unassigned	0	0	0	0	0	0	0	0	144	0	0	0	0	0	0	0	0	0	0	0	0	0	0	0	0	0	0	0	0	0	0	0	0	0	0	0	0	0	0	0	0	0
0d50fbcc589387c20f9ca0a426484f33_rep;size=253;	Unassigned	Unassigned	Unassigned	Unassigned	Unassigned	Unassigned	Unassigned	10	0	0	0	1	0	0	4	0	0	0	0	0	7	0	2	0	1	0	0	0	0	4	0	2	0	1	3	1	0	14	0	1	0	1	2	1	0	0	3	0	1
95348be5f9503f8eb612c28eb51ce514_rep;size=253;	k__Bacteria	p__Proteobacteria	c__Alphaproteobacteria	o__Sphingomonadales	f__Sphingomonadaceae	g__Sphingomonas	Ambiguous_taxa	0	0	0	0	0	1	0	0	0	0	172	0	0	0	18	0	0	0	1	0	0	0	0	0	0	0	0	1	0	0	0	0	1	0	0	0	1	1	0	0	0	0
383e1913abdc63ee45fde0db138b69e4_rep;size=252;	k__Bacteria	p__Bacteroidetes	c__Bacteroidia	o__Cytophagales	f__Microscillaceae	g__uncultured	g__uncultured	0	0	0	0	0	2	0	0	2	0	0	0	0	0	0	0	0	0	0	222	0	0	0	0	0	0	0	0	0	1	0	0	0	0	0	0	0	0	0	0	0	0
e9cee56378e6adb6a027e7e4d69766fc_rep;size=252;	Unassigned	Unassigned	Unassigned	Unassigned	Unassigned	Unassigned	Unassigned	0	0	0	0	0	0	0	0	0	0	3	0	0	0	0	0	0	1	0	0	2	0	0	0	0	0	0	0	0	1	0	0	1	0	0	1	0	0	0	0	0	0
833a93564596836df1babbb04395574d_rep;size=252;	Unassigned	Unassigned	Unassigned	Unassigned	Unassigned	Unassigned	Unassigned	1	0	0	0	0	0	1	0	0	0	1	1	0	0	0	1	0	0	0	0	0	0	0	0	2	2	0	7	0	0	0	0	1	0	0	7	11	0	0	1	1	0
483877570877401d4a27ad769db1c0f3_rep;size=251;	k__Bacteria	p__Proteobacteria	c__Alphaproteobacteria	o__Rhizobiales	f__Beijerinckiaceae	g__Methylobacterium	Ambiguous_taxa	0	0	0	0	0	0	0	0	0	0	0	0	0	0	4	0	0	0	0	0	0	0	0	0	0	0	0	0	0	0	0	0	0	0	0	0	0	0	0	0	0	0
19cde0218fc9c315f0d0f7f14491f4b9_rep;size=251;	k__Bacteria	p__Proteobacteria	c__Alphaproteobacteria	o__Acetobacterales	f__Acetobacteraceae	g__Craurococcus	s__uncultured bacterium	1	0	0	0	5	0	12	0	2	1	0	0	0	6	0	0	0	1	0	0	0	0	0	0	3	0	0	3	0	0	0	0	4	0	0	0	4	0	3	0	0	11
fc51ee375d48ce72f45922f48f90b79c_rep;size=250;	k__Bacteria	p__Proteobacteria	c__Alphaproteobacteria	o__Rhodobacterales	f__Rhodobacteraceae	f__Rhodobacteraceae	f__Rhodobacteraceae	0	0	6	0	0	0	0	13	0	0	0	0	0	0	0	0	1	2	0	0	0	7	0	0	0	0	8	7	2	0	5	0	2	0	3	7	2	1	0	3	0	6
edb6d0529477e4eccd461f4db11aff58_rep;size=250;	Unassigned	Unassigned	Unassigned	Unassigned	Unassigned	Unassigned	Unassigned	8	0	0	0	0	0	0	0	0	0	0	0	0	0	0	0	0	0	0	0	0	0	27	0	0	0	0	4	0	0	1	0	135	0	0	0	0	0	0	1	0	0
ea2ef93db75846bb897bcf76df806771_rep;size=250;	Unassigned	Unassigned	Unassigned	Unassigned	Unassigned	Unassigned	Unassigned	3	0	0	1	0	0	0	0	0	0	0	0	0	4	0	23	0	0	0	0	1	0	1	0	0	0	0	7	2	0	0	0	0	0	0	5	0	0	0	13	0	0
1267af4b57cbf99f4c36a4ce96f31875_rep;size=249;	Unassigned	Unassigned	Unassigned	Unassigned	Unassigned	Unassigned	Unassigned	2	0	0	0	0	1	0	0	0	21	48	0	0	0	0	0	0	0	51	0	0	0	1	0	0	0	0	0	0	0	0	0	0	0	0	0	0	0	0	0	0	0
d5cc19e34abfd48700ea20036a6430a3_rep;size=249;	k__Bacteria	p__Deinococcus-Thermus	c__Deinococci	o__Deinococcales	f__Deinococcaceae	g__Deinococcus	Ambiguous_taxa	0	0	0	0	0	239	0	0	0	0	0	0	0	0	2	0	0	0	1	0	0	0	0	0	0	0	0	0	0	0	0	0	0	0	0	0	0	0	0	0	0	0
27fe058745f0bc92cb1abfcdaccd5d32_rep;size=249;	Unassigned	Unassigned	Unassigned	Unassigned	Unassigned	Unassigned	Unassigned	4	0	0	1	0	0	0	0	2	0	0	0	0	0	0	0	0	0	8	0	4	0	1	0	0	0	0	1	0	0	0	0	152	0	0	0	0	0	0	0	0	0
1458f9aaae7589b26ee3906835304242_rep;size=248;	k__Bacteria	p__Proteobacteria	c__Alphaproteobacteria	o__Rhizobiales	f__Rhizobiaceae	g__Allorhizobium-Neorhizobium-Pararhizobium-Rhizobium	Ambiguous_taxa	0	0	0	0	1	0	3	1	3	0	0	0	0	0	0	1	2	0	0	0	0	0	1	0	3	0	0	3	5	0	1	0	1	0	0	29	1	0	2	15	0	0
4ee8d656656d16c7dadf772be71ad085_rep;size=248;	Unassigned	Unassigned	Unassigned	Unassigned	Unassigned	Unassigned	Unassigned	3	0	0	2	0	0	0	0	2	0	0	0	0	0	0	0	1	0	1	0	2	0	4	0	1	0	0	0	0	0	0	0	146	0	1	0	1	0	0	0	0	0
bade8c23b26cce8ac07278ae5d20ed50_rep;size=248;	Unassigned	Unassigned	Unassigned	Unassigned	Unassigned	Unassigned	Unassigned	0	0	15	0	0	0	0	27	0	0	0	4	0	0	0	0	0	1	0	0	0	51	0	0	1	0	67	0	0	0	8	0	0	0	0	0	0	0	0	0	0	34
256584df1c1158fb7453aab99508fb56_rep;size=248;	k__Bacteria	p__Proteobacteria	c__Alphaproteobacteria	o__Rhizobiales	f__Beijerinckiaceae	g__Methylobacterium	g__Methylobacterium	0	0	0	3	0	2	1	0	2	19	50	0	0	0	2	0	0	0	2	1	1	0	1	0	1	0	0	0	2	4	0	0	1	0	0	0	0	0	0	0	0	0
0cff8314a325c3cc64d2fca7a01d08d9_rep;size=248;	k__Bacteria	p__Proteobacteria	c__Alphaproteobacteria	o__Sphingomonadales	f__Sphingomonadaceae	g__Sphingomonas	g__Sphingomonas	0	0	0	0	0	13	0	0	0	128	5	0	0	0	8	0	0	0	10	0	0	0	0	0	0	0	0	0	0	0	0	0	0	0	0	0	0	0	0	0	0	0
30d7e258267f29f3ec3f181692447d2c_rep;size=248;	Unassigned	Unassigned	Unassigned	Unassigned	Unassigned	Unassigned	Unassigned	2	0	0	0	0	0	2	0	0	0	2	0	0	1	0	9	0	0	0	0	0	0	1	0	0	0	0	2	3	0	1	0	6	0	0	0	2	0	0	9	0	3
e701e94668336cc25878fe1a53716123_rep;size=247;	Unassigned	Unassigned	Unassigned	Unassigned	Unassigned	Unassigned	Unassigned	0	5	0	0	0	0	0	0	0	0	0	0	0	0	0	0	0	0	0	0	0	0	0	0	0	0	0	0	14	0	2	2	0	0	0	0	0	0	0	0	0	0
b2d5dfd4159aebc55486dec53673f213_rep;size=247;	k__Bacteria	p__Actinobacteria	c__Actinobacteria	o__Micrococcales	f__uncultured	g__uncultured bacterium	s__uncultured bacterium	7	0	1	2	0	0	0	0	0	0	0	0	0	2	0	13	1	7	0	0	0	0	9	0	3	11	0	4	3	5	2	0	3	2	5	0	2	2	1	8	5	4
3890089281d0b16dea458025434be4f9_rep;size=247;	k__Bacteria	p__Proteobacteria	c__Gammaproteobacteria	o__Betaproteobacteriales	f__Burkholderiaceae	g__Massilia	Ambiguous_taxa	0	0	0	0	0	0	0	0	0	0	0	0	0	10	0	11	0	0	0	0	0	0	2	0	0	0	0	0	0	0	0	0	0	0	0	0	0	0	0	0	0	0
c28ed259ceb82fdbc28c790d01b97578_rep;size=247;	k__Bacteria	p__Proteobacteria	c__Alphaproteobacteria	o__Rhizobiales	f__Beijerinckiaceae	f__Beijerinckiaceae	f__Beijerinckiaceae	0	0	0	1	0	0	0	0	2	0	4	0	0	0	0	0	0	0	0	0	0	0	0	0	2	0	0	0	33	0	0	0	7	0	0	0	0	0	0	0	1	0
32633b756b97dec1b9696dfebb01c2d7_rep;size=246;	k__Bacteria	p__Proteobacteria	c__Alphaproteobacteria	o__Rhodobacterales	f__Rhodobacteraceae	f__Rhodobacteraceae	f__Rhodobacteraceae	4	0	0	0	0	0	0	3	0	0	0	0	0	0	0	0	0	0	0	0	0	0	0	0	0	0	1	5	1	0	3	0	0	1	3	1	2	0	0	1	1	1
79de8ab2ff2f31db672ed2418a55fa44_rep;size=246;	k__Bacteria	p__Proteobacteria	c__Alphaproteobacteria	o__Sphingomonadales	f__Sphingomonadaceae	g__Sphingomonas	Ambiguous_taxa	1	9	0	0	0	4	1	0	9	0	10	0	0	0	0	0	0	0	0	21	0	0	2	0	0	1	0	0	5	0	0	1	2	0	0	0	0	0	2	0	0	0
0b8a5a63a2130bc156fa335dba8c2873_rep;size=246;	k__Bacteria	p__Proteobacteria	c__Alphaproteobacteria	o__Rhodobacterales	f__Rhodobacteraceae	g__Ketogulonicigenium	g__Ketogulonicigenium	0	0	0	0	0	0	0	0	0	0	0	0	0	0	0	0	0	0	0	5	0	0	0	0	0	0	0	0	0	0	0	1	1	0	0	0	0	0	0	0	0	0
8e1819e192041fc5ee69f79404ca793a_rep;size=246;	k__Bacteria	p__Proteobacteria	c__Alphaproteobacteria	o__Acetobacterales	f__Acetobacteraceae	f__Acetobacteraceae	f__Acetobacteraceae	0	0	0	0	0	0	0	0	0	0	0	0	0	0	0	0	0	0	0	0	0	0	0	0	0	0	0	0	0	0	0	0	0	0	0	0	0	0	0	0	0	0
3c2974b574962142dc04c6f5270b3eb7_rep;size=246;	Unassigned	Unassigned	Unassigned	Unassigned	Unassigned	Unassigned	Unassigned	2	26	0	0	0	1	0	0	0	0	4	0	0	0	0	0	0	0	0	1	1	0	0	0	2	1	0	0	16	0	0	1	0	2	0	0	1	0	0	0	0	0
a72c7b5db5b05d45e54e9f6c822b8f10_rep;size=246;	Unassigned	Unassigned	Unassigned	Unassigned	Unassigned	Unassigned	Unassigned	6	1	1	1	0	0	1	0	0	0	0	0	0	0	0	2	0	0	0	0	5	1	0	0	1	1	0	10	1	0	0	0	5	0	0	4	4	0	0	1	1	0
0251ef80a39b8311fcc47ee600029434_rep;size=245;	Unassigned	Unassigned	Unassigned	Unassigned	Unassigned	Unassigned	Unassigned	0	0	0	0	0	1	0	0	3	0	0	1	0	0	0	0	0	0	0	11	0	0	0	0	0	0	0	0	0	9	0	0	2	20	0	0	0	0	0	0	0	0
b57292b42f5f201d0483caf11100a326_rep;size=245;	Unassigned	Unassigned	Unassigned	Unassigned	Unassigned	Unassigned	Unassigned	0	18	0	1	0	0	0	0	0	0	0	0	4	0	0	0	23	0	0	2	0	0	0	2	1	0	0	0	7	0	0	5	0	0	0	0	0	0	1	0	0	0
8e1ae6e453cac2dcaabe3fc1a8891445_rep;size=245;	Unassigned	Unassigned	Unassigned	Unassigned	Unassigned	Unassigned	Unassigned	3	0	0	0	0	0	1	3	0	0	0	0	0	2	0	8	0	1	0	0	0	3	1	0	1	1	2	4	1	0	0	0	0	0	5	3	11	0	0	3	3	1
a3e2321d85bcd7da10c615ebb7a8e2ff_rep;size=244;	Unassigned	Unassigned	Unassigned	Unassigned	Unassigned	Unassigned	Unassigned	0	1	0	1	0	0	0	0	0	0	0	0	0	0	0	6	0	1	0	0	2	0	0	0	0	0	0	7	2	0	0	0	0	0	0	12	1	0	0	1	0	0
9f9207a22119e35197e93e25ca3d6faf_rep;size=244;	k__Bacteria	p__Proteobacteria	c__Alphaproteobacteria	o__Rickettsiales	f__Mitochondria	f__Mitochondria	f__Mitochondria	0	0	1	1	0	0	1	0	0	0	0	7	0	9	0	0	0	27	0	0	0	0	0	0	0	0	0	0	1	0	0	0	0	0	0	0	0	0	0	0	0	0
e6410d45e6b8fe92eebd44ebc5b8d04a_rep;size=244;	k__Bacteria	p__Proteobacteria	c__Alphaproteobacteria	o__Rhizobiales	f__Rhizobiaceae	f__Rhizobiaceae	f__Rhizobiaceae	1	0	0	0	0	1	40	0	0	0	0	0	0	0	0	0	0	0	0	0	0	0	0	0	0	0	0	0	0	1	7	2	0	1	0	25	1	1	0	0	1	2
12c9caef39ed9409472f43b69f5026d4_rep;size=243;	k__Bacteria	p__Proteobacteria	c__Alphaproteobacteria	o__Caulobacterales	f__Caulobacteraceae	g__Asticcacaulis	Ambiguous_taxa	0	0	1	0	0	0	0	0	0	0	0	0	0	0	0	0	0	0	0	3	0	1	0	0	0	0	0	0	0	0	0	0	0	13	0	2	0	0	0	0	1	0
53cab40e7e254ddd4eeb5ae4466d71f9_rep;size=243;	Unassigned	Unassigned	Unassigned	Unassigned	Unassigned	Unassigned	Unassigned	0	0	0	0	0	0	0	0	1	0	0	0	0	0	0	0	0	0	0	0	0	0	0	0	0	0	0	0	83	0	0	0	3	0	0	0	1	0	0	0	1	0
4d1f43c49f241fad2e241d2296a8ae6b_rep;size=243;	Unassigned	Unassigned	Unassigned	Unassigned	Unassigned	Unassigned	Unassigned	0	0	12	0	0	0	0	13	0	0	0	0	0	4	0	7	0	5	0	0	0	22	0	0	0	0	43	1	8	0	2	0	0	0	0	5	0	0	0	12	2	3
b0c76f5cf571e7ac396be51251cb6026_rep;size=243;	Unassigned	Unassigned	Unassigned	Unassigned	Unassigned	Unassigned	Unassigned	1	0	0	0	0	0	0	2	0	0	0	0	0	0	0	1	0	2	0	0	0	1	1	0	0	9	0	5	0	0	0	0	0	0	10	1	8	0	0	0	0	7
8d411fd0eca780613c3cd8a48c42b821_rep;size=242;	k__Bacteria	p__Firmicutes	c__Bacilli	o__Bacillales	f__Planococcaceae	g__Solibacillus	g__Solibacillus	0	0	0	0	0	0	0	0	0	1	0	0	0	0	17	0	0	0	1	0	0	0	2	0	0	0	0	0	1	1	0	0	2	2	0	0	1	0	0	0	0	0
ffdf740678c51046c286a86a0eedcc61_rep;size=242;	Unassigned	Unassigned	Unassigned	Unassigned	Unassigned	Unassigned	Unassigned	12	0	0	0	0	0	0	4	0	0	0	0	0	2	0	2	0	0	0	0	0	0	1	0	1	1	3	0	5	0	7	0	0	0	3	0	2	1	0	5	1	2
8214af5de4aba578eaaf8181bb3fdb03_rep;size=242;	Unassigned	Unassigned	Unassigned	Unassigned	Unassigned	Unassigned	Unassigned	13	1	0	0	0	0	0	2	0	0	0	0	0	0	0	0	0	0	0	0	0	0	0	1	1	0	0	3	11	0	4	7	0	0	1	3	5	0	0	1	2	0
e7f1ab8e8df30504f257c712e866bcff_rep;size=242;	k__Bacteria	p__Actinobacteria	c__Actinobacteria	o__Micrococcales	f__Microbacteriaceae	f__Microbacteriaceae	f__Microbacteriaceae	1	20	1	7	1	1	1	0	0	0	0	2	0	0	0	0	7	3	0	0	2	2	0	0	3	0	1	1	11	1	0	4	0	0	1	0	1	2	25	0	1	0
86b55a6674171c1e9ad9cc2489317c6d_rep;size=241;	Unassigned	Unassigned	Unassigned	Unassigned	Unassigned	Unassigned	Unassigned	0	0	0	0	0	0	0	0	0	0	13	0	0	0	0	0	0	0	155	0	3	0	0	0	0	0	0	0	0	0	0	0	1	0	0	0	1	0	0	0	0	0
e6d4759ebf5376ff9b046a797c034161_rep;size=241;	k__Bacteria	p__Bacteroidetes	c__Bacteroidia	o__Cytophagales	f__Cyclobacteriaceae	g__Marinoscillum	s__uncultured bacterium	0	1	0	1	0	1	0	0	0	0	0	0	5	4	1	0	0	0	0	0	0	0	0	0	0	0	0	0	0	0	0	0	0	0	3	0	0	0	0	0	2	1
3d2667259890f38d7e6d41563ffd990b_rep;size=241;	Unassigned	Unassigned	Unassigned	Unassigned	Unassigned	Unassigned	Unassigned	3	0	0	4	0	2	0	0	0	0	0	0	22	0	0	0	1	0	0	0	0	0	11	32	0	2	0	0	0	0	6	0	2	0	0	0	0	0	0	3	8	0
5ffb15c724f34e93b33883f8e9c63833_rep;size=241;	k__Bacteria	p__Proteobacteria	c__Gammaproteobacteria	o__Enterobacteriales	f__Enterobacteriaceae	g__Escherichia-Shigella	s__Streptomyces sp. Q1	36	0	13	0	0	0	0	1	0	0	0	1	0	0	0	0	0	4	0	0	0	0	2	19	4	0	0	1	0	3	1	0	0	0	1	0	0	0	2	0	0	0
0a14e1197be7b5b1a65c8601d5ea9d48_rep;size=240;	k__Bacteria	p__Proteobacteria	c__Alphaproteobacteria	o__Rhizobiales	f__Rhizobiaceae	g__Hoeflea	Ambiguous_taxa	1	0	1	0	0	0	0	1	0	0	0	0	0	2	0	0	1	1	0	0	0	4	0	0	0	0	0	0	0	6	119	3	0	8	1	4	0	0	0	0	1	0
5773f6a9eed95f634c37445a7f7d0200_rep;size=240;	k__Bacteria	p__Proteobacteria	c__Alphaproteobacteria	o__Rhizobiales	f__Rhizobiaceae	g__Mesorhizobium	g__Mesorhizobium	0	0	0	0	0	0	96	0	0	0	0	0	0	0	0	0	0	0	0	0	0	0	0	0	0	0	0	0	0	0	0	0	0	0	0	70	0	0	0	0	0	1
6e360cc7df0d4a9a7d9ce4109c59a166_rep;size=240;	k__Bacteria	p__Actinobacteria	c__Actinobacteria	o__Micrococcales	f__Dermabacteraceae	g__Brachybacterium	Ambiguous_taxa	0	0	0	0	0	0	3	1	0	0	0	1	0	61	0	0	0	0	0	0	0	0	0	0	0	1	1	0	1	0	0	0	0	0	0	0	0	0	0	1	1	0
f9845c2a714ffe1595f7a4ff7fcc92ad_rep;size=240;	k__Bacteria	p__Proteobacteria	c__Alphaproteobacteria	o__Rhizobiales	f__Beijerinckiaceae	g__Methylobacterium	g__Methylobacterium	0	0	0	2	0	3	1	0	1	95	0	0	0	0	1	0	0	0	16	0	1	0	0	0	1	0	0	3	0	0	0	0	0	0	0	0	0	0	0	1	0	0
d0eebef57329b112f7cb5a1b057bbcc6_rep;size=240;	Unassigned	Unassigned	Unassigned	Unassigned	Unassigned	Unassigned	Unassigned	7	1	1	0	0	4	2	1	0	0	0	1	5	0	0	0	6	0	0	0	3	3	1	5	1	0	2	3	8	0	5	3	1	1	0	7	2	1	1	2	2	3
037ab3fd8c5029b2cd0affc1a38a3dd1_rep;size=239;	Unassigned	Unassigned	Unassigned	Unassigned	Unassigned	Unassigned	Unassigned	9	0	0	0	0	0	0	0	1	1	6	0	0	0	0	0	0	0	4	0	13	0	0	0	3	0	0	3	0	0	0	2	2	0	0	0	5	0	0	0	0	0
dee14ae1c9b3087cb8a9d05026c61951_rep;size=239;	k__Bacteria	p__Proteobacteria	c__Alphaproteobacteria	o__Sphingomonadales	f__Sphingomonadaceae	g__Altererythrobacter	Ambiguous_taxa	0	0	2	0	0	0	12	5	1	5	0	1	0	2	0	5	0	5	0	0	0	0	0	0	5	1	12	0	16	0	1	0	0	0	0	5	2	0	0	6	0	10
7b05a465b76a946ac55f4a88fc178b56_rep;size=239;	Unassigned	Unassigned	Unassigned	Unassigned	Unassigned	Unassigned	Unassigned	0	0	0	0	0	0	0	0	150	0	0	0	0	0	0	0	0	0	0	0	0	0	0	0	0	0	0	0	0	0	0	0	0	0	0	0	1	0	0	0	0	0
70a3151ba8cf0ec20ad4c38d4c9b607a_rep;size=238;	k__Bacteria	p__Proteobacteria	c__Alphaproteobacteria	o__Sphingomonadales	f__Sphingomonadaceae	g__Sphingomonas	g__Sphingomonas	2	1	0	2	0	7	0	0	7	0	1	0	0	0	0	0	3	0	12	0	23	0	1	0	0	0	0	5	2	0	0	0	6	0	1	3	3	0	0	0	0	0
76e4e226c54a58b5577324abd82bfaba_rep;size=238;	k__Bacteria	p__Proteobacteria	c__Alphaproteobacteria	o__Sphingomonadales	f__Sphingomonadaceae	f__Sphingomonadaceae	f__Sphingomonadaceae	32	0	0	0	1	1	0	2	0	0	3	0	0	0	0	0	0	0	0	2	0	0	0	1	1	2	1	8	0	0	0	0	0	1	2	0	1	0	1	1	0	0
0f0299da8484beffb047a4b60e89154c_rep;size=237;	Unassigned	Unassigned	Unassigned	Unassigned	Unassigned	Unassigned	Unassigned	1	0	0	1	0	10	0	1	0	0	1	0	0	0	34	1	2	0	1	0	18	0	0	0	0	0	0	2	2	0	0	0	1	0	1	1	6	0	0	2	0	0
ff29afa0e8bf7e5930c6cfe30547916c_rep;size=237;	Unassigned	Unassigned	Unassigned	Unassigned	Unassigned	Unassigned	Unassigned	13	1	0	4	0	0	1	0	0	0	0	0	1	0	0	0	5	0	2	0	0	3	0	2	0	0	0	11	4	0	0	0	0	1	1	12	9	0	1	4	0	0
e03dc6a1433cb935f3076b823b665ac7_rep;size=237;	k__Bacteria	p__Actinobacteria	c__Actinobacteria	o__Micrococcales	f__Micrococcaceae	f__Micrococcaceae	f__Micrococcaceae	0	0	8	2	0	0	0	10	0	0	0	11	0	3	0	0	0	6	0	0	0	27	0	0	0	0	32	0	0	0	0	0	0	0	0	2	0	1	0	5	0	9
a388d835d707581833c8ba1cd43683c5_rep;size=237;	k__Bacteria	p__Proteobacteria	c__Alphaproteobacteria	o__Rhodobacterales	f__Rhodobacteraceae	g__uncultured	g__uncultured	0	0	0	0	0	0	91	0	0	0	0	0	0	0	0	0	0	0	0	0	0	0	0	0	0	0	0	0	5	2	2	0	1	0	0	29	0	0	0	0	0	0
316fa0696b66df32b4c03d64b809d7f7_rep;size=237;	Unassigned	Unassigned	Unassigned	Unassigned	Unassigned	Unassigned	Unassigned	3	0	0	2	0	0	0	0	0	0	3	0	0	0	0	2	0	1	0	0	5	0	0	0	2	1	1	11	0	0	1	0	6	0	0	0	1	0	0	0	1	0
85dadc961532f2cbf795227646e8b33d_rep;size=236;	k__Bacteria	p__Deinococcus-Thermus	c__Deinococci	o__Deinococcales	f__Deinococcaceae	g__Deinococcus	s__uncultured bacterium	0	0	1	0	5	0	0	0	0	3	0	0	0	1	0	4	0	1	0	0	0	0	0	0	7	0	2	7	5	0	0	0	7	0	0	0	4	0	1	1	0	0
e0704452a4fd06b1e1cefebce89d1790_rep;size=236;	k__Bacteria	p__Proteobacteria	c__Alphaproteobacteria	o__Sphingomonadales	f__Sphingomonadaceae	g__Sphingomonas	Ambiguous_taxa	0	0	0	4	2	0	0	0	0	0	28	0	0	5	0	1	0	0	0	0	0	0	0	0	0	0	0	0	0	1	0	0	0	0	0	23	1	0	0	1	0	1
1dcb7bc504bf0fcaeba3f1df1e22d216_rep;size=236;	k__Bacteria	p__Proteobacteria	c__Alphaproteobacteria	o__Rhizobiales	f__Beijerinckiaceae	f__Beijerinckiaceae	f__Beijerinckiaceae	0	0	0	0	0	0	0	0	0	0	0	0	0	0	0	0	0	0	0	0	0	0	0	0	0	0	0	0	3	0	0	0	0	0	0	0	0	0	0	0	0	0
a958ca3a185162a54cdebe153272a944_rep;size=236;	k__Bacteria	p__Proteobacteria	c__Alphaproteobacteria	o__Rhizobiales	f__Beijerinckiaceae	g__Methylobacterium	Ambiguous_taxa	0	0	0	0	0	45	0	0	2	0	0	0	0	0	15	0	0	0	18	0	0	0	0	0	0	0	0	0	0	0	0	0	0	0	0	0	0	0	0	0	0	0
a9fea28c0c289d4a0b6fdd144eff6165_rep;size=236;	k__Bacteria	p__Proteobacteria	c__Alphaproteobacteria	o__Sphingomonadales	f__Sphingomonadaceae	g__Sphingomonas	Ambiguous_taxa	0	0	0	0	0	0	0	0	0	0	45	0	0	0	2	0	0	0	102	0	23	0	0	0	0	0	0	1	0	0	0	0	7	0	0	1	0	0	0	0	0	0
895bb8a25c9c4192654c248c16b6c100_rep;size=236;	Unassigned	Unassigned	Unassigned	Unassigned	Unassigned	Unassigned	Unassigned	0	0	0	2	0	1	0	0	1	0	0	0	0	0	0	1	0	0	1	0	1	0	0	0	1	0	0	2	0	0	0	10	2	0	0	0	8	0	0	2	0	0
609cf6d12b3c51d29910157ad3001356_rep;size=236;	k__Bacteria	p__Proteobacteria	c__Alphaproteobacteria	o__Rhodobacterales	f__Rhodobacteraceae	g__Paracoccus	g__Paracoccus	0	0	1	5	0	0	2	0	1	0	0	0	0	1	0	7	0	0	0	0	2	0	2	1	0	0	4	9	2	0	1	0	6	0	0	7	1	0	0	14	0	1
afa5f7eb68aba8450e700c1a22caf348_rep;size=236;	k__Bacteria	p__Proteobacteria	c__Alphaproteobacteria	o__Acetobacterales	f__Acetobacteraceae	g__Acetobacter	g__Acetobacter	0	0	0	0	0	0	0	0	0	0	0	0	0	0	0	0	0	0	0	0	0	0	0	0	0	0	0	0	0	0	0	0	0	0	0	0	0	0	0	0	0	0
005216c84eabda9db40c58c55a494f73_rep;size=235;	k__Bacteria	p__Cyanobacteria	c__Oxyphotobacteria	o__Nostocales	f__uncultured	g__uncultured bacterium	s__uncultured bacterium	2	0	0	0	0	0	0	0	0	0	0	1	0	9	0	0	0	0	0	0	0	0	0	0	3	0	0	2	2	0	0	0	18	0	1	1	0	0	0	0	0	0
9259f165d09a6f5000ffa9729a7a0198_rep;size=235;	k__Bacteria	p__Proteobacteria	c__Alphaproteobacteria	o__Caulobacterales	f__Caulobacteraceae	g__Brevundimonas	g__Brevundimonas	0	0	0	0	0	0	3	0	0	0	0	0	0	0	0	3	2	3	0	0	0	0	0	0	0	0	0	0	125	0	2	0	0	0	0	3	0	0	0	2	0	0
763be8cdd71e20a7288e78f12da48150_rep;size=235;	Unassigned	Unassigned	Unassigned	Unassigned	Unassigned	Unassigned	Unassigned	0	0	0	0	0	0	0	0	0	0	0	0	0	0	0	0	0	0	0	0	0	0	0	0	0	0	0	0	0	0	0	0	0	0	0	0	0	0	0	0	0	0
3bf37d2db9ed7cedef08f606ca3722f8_rep;size=235;	k__Bacteria	p__Proteobacteria	c__Alphaproteobacteria	o__Caulobacterales	f__Caulobacteraceae	g__Brevundimonas	g__Brevundimonas	0	12	0	5	0	0	0	0	2	0	0	2	0	0	0	0	5	0	0	0	0	2	6	1	0	0	0	0	0	0	2	0	1	0	0	0	0	0	23	0	0	1
10ed2f6786c4c49bb779621f545a0a1c_rep;size=235;	Unassigned	Unassigned	Unassigned	Unassigned	Unassigned	Unassigned	Unassigned	4	0	0	0	0	0	7	0	0	0	0	0	0	0	1	1	1	1	1	1	0	0	0	0	2	0	3	2	5	0	0	0	0	0	0	44	1	0	0	0	0	0
4c35c667df2d49fb64ac15d6f9aa4795_rep;size=235;	Unassigned	Unassigned	Unassigned	Unassigned	Unassigned	Unassigned	Unassigned	66	0	0	0	0	0	0	1	0	0	0	0	0	4	0	1	1	1	0	0	0	0	1	0	2	0	0	1	3	0	0	1	2	0	1	2	3	0	0	3	3	0
6e09f89ab07c149980339db52f4d8367_rep;size=235;	Unassigned	Unassigned	Unassigned	Unassigned	Unassigned	Unassigned	Unassigned	7	0	0	0	0	0	1	3	0	0	0	0	3	0	0	4	0	0	0	0	0	0	6	0	4	0	0	0	0	0	4	0	7	0	1	3	0	0	0	13	3	0
b87dca9772642393b00e9a67390cd2d9_rep;size=234;	k__Bacteria	p__Proteobacteria	c__Gammaproteobacteria	o__Pseudomonadales	f__Pseudomonadaceae	g__Pseudomonas	g__Pseudomonas	0	0	1	0	0	0	0	3	0	0	0	1	0	2	0	0	15	1	0	6	0	41	0	0	0	0	0	0	2	28	1	0	0	13	1	1	0	1	0	0	0	0
5ae30f63e3cb466bd866b2fa4ad0ac99_rep;size=234;	k__Bacteria	p__Firmicutes	c__Bacilli	o__Lactobacillales	f__Carnobacteriaceae	g__Alkalibacterium	s__Alkalibacterium indicireducens	0	5	1	0	0	0	168	2	0	0	0	0	0	0	0	0	0	2	0	0	0	3	0	0	0	0	11	0	0	0	0	0	0	1	0	0	0	0	0	0	1	0
5428101d0159df6c07f969c1051872ec_rep;size=234;	k__Bacteria	p__Actinobacteria	c__Actinobacteria	o__Micrococcales	f__Microbacteriaceae	g__Microbacterium	g__Microbacterium	4	0	0	18	0	0	0	1	0	0	0	2	0	1	0	0	0	0	0	0	0	0	17	4	0	1	0	0	2	0	1	0	0	1	1	2	0	0	1	1	2	2
02cbbe13891cad0129b302a493d124ec_rep;size=233;	k__Bacteria	p__Proteobacteria	c__Alphaproteobacteria	o__Rhodobacterales	f__Rhodobacteraceae	f__Rhodobacteraceae	f__Rhodobacteraceae	1	0	5	0	0	0	1	11	0	0	0	0	0	0	0	5	0	0	0	0	0	3	0	0	1	0	6	8	3	0	0	0	0	0	1	10	1	0	0	2	0	7
551fff5b9185835a67c6fff95ddcc58c_rep;size=233;	Unassigned	Unassigned	Unassigned	Unassigned	Unassigned	Unassigned	Unassigned	2	3	0	3	0	0	0	0	7	0	1	0	0	0	1	0	4	0	1	0	10	0	5	0	1	0	0	1	1	0	0	1	2	1	0	13	2	0	2	2	0	0
6a5264349291a5792d1b685b3190c267_rep;size=232;	k__Bacteria	p__Bacteroidetes	c__Bacteroidia	o__Sphingobacteriales	f__NS11-12 marine group	f__NS11-12 marine group	f__NS11-12 marine group	0	56	1	3	0	0	0	0	0	0	0	0	0	0	0	0	0	0	0	9	0	19	0	0	0	0	0	0	0	0	0	0	0	0	0	0	0	0	0	0	0	4
8d5eb1d330d9ea89f1704bfb99799edc_rep;size=232;	Unassigned	Unassigned	Unassigned	Unassigned	Unassigned	Unassigned	Unassigned	0	0	0	0	0	0	0	0	0	0	0	3	0	0	0	0	0	0	0	0	0	0	0	0	0	0	0	0	0	0	0	0	0	0	0	3	1	0	0	0	0	3
cd675073c2f19f67c6d99b8f21e6c631_rep;size=232;	k__Bacteria	p__Actinobacteria	c__Actinobacteria	o__Corynebacteriales	f__Mycobacteriaceae	g__Mycobacterium	g__Mycobacterium	0	0	0	0	1	0	1	0	0	0	0	0	0	0	0	1	0	1	0	0	0	0	0	0	0	0	0	0	0	16	2	0	1	7	0	0	0	0	161	0	1	0
6c1e212d34132a86f7553be91873da4f_rep;size=232;	Unassigned	Unassigned	Unassigned	Unassigned	Unassigned	Unassigned	Unassigned	12	0	0	1	0	0	0	1	0	0	1	0	0	0	0	0	3	0	1	0	1	1	0	0	0	0	0	4	2	0	0	0	0	1	1	4	10	0	0	4	1	1
48a5c5145d5ec2cdb808de8589d6c8ab_rep;size=231;	k__Bacteria	p__Proteobacteria	c__Alphaproteobacteria	o__Sphingomonadales	f__Sphingomonadaceae	g__Sphingopyxis	g__Sphingopyxis	0	0	0	0	0	0	0	0	0	0	0	0	0	0	0	0	0	0	0	0	0	0	0	0	0	0	0	0	0	0	0	0	0	0	0	0	0	0	0	0	0	0
76e6d35d189cf7cf9061a8afd99846ef_rep;size=231;	k__Bacteria	p__Actinobacteria	c__Actinobacteria	o__Micrococcales	f__Microbacteriaceae	g__Gulosibacter	g__Gulosibacter	0	0	2	1	0	0	1	2	0	0	0	3	0	1	0	1	0	6	0	0	0	1	3	0	0	10	2	0	5	0	3	0	1	4	6	3	1	0	0	1	1	4
6ae6dd511b82fb493fc5df21fc66fc46_rep;size=230;	k__Bacteria	p__Proteobacteria	c__Alphaproteobacteria	o__Sphingomonadales	f__Sphingomonadaceae	g__Sphingobium	Ambiguous_taxa	0	13	0	0	0	0	0	1	0	0	0	0	0	0	0	0	0	0	0	1	0	1	0	0	0	0	0	1	0	1	0	0	0	1	0	0	0	0	1	0	0	0
b440cde13cf37472ee2147aabf318985_rep;size=230;	k__Bacteria	p__Cyanobacteria	c__Oxyphotobacteria	o__Nostocales	f__uncultured	g__uncultured bacterium	s__uncultured bacterium	0	0	0	0	1	0	0	0	0	0	0	0	0	0	0	0	0	10	0	0	0	0	0	0	7	0	0	5	0	0	0	0	1	0	0	1	1	0	0	0	0	9
760b2068534c56801d8132ea1a196811_rep;size=230;	k__Bacteria	p__Proteobacteria	c__Gammaproteobacteria	o__Betaproteobacteriales	f__Burkholderiaceae	g__Acidovorax	s__uncultured Acidovorax sp.	0	0	0	0	0	0	0	0	0	0	0	0	0	0	0	0	0	0	0	5	0	0	0	0	0	0	0	0	0	0	0	0	0	0	1	0	0	0	0	0	0	0
b35d9b467a3b193fc839d2da9f28f30e_rep;size=230;	Unassigned	Unassigned	Unassigned	Unassigned	Unassigned	Unassigned	Unassigned	11	0	0	3	0	1	1	0	0	0	0	5	12	0	0	1	2	6	0	0	2	0	12	4	3	0	1	1	3	0	5	0	0	1	2	7	0	1	1	3	0	0
f29cbb601f13cacaceff913f014a9f97_rep;size=230;	k__Bacteria	p__Actinobacteria	c__Actinobacteria	o__Micrococcales	f__Intrasporangiaceae	f__Intrasporangiaceae	f__Intrasporangiaceae	4	0	0	0	0	0	1	0	0	0	0	0	0	3	0	21	0	3	0	0	0	0	7	1	0	7	0	3	3	0	0	0	0	0	5	1	9	0	0	5	3	1
e601d5f1adda50d701948a775b513a54_rep;size=229;	k__Bacteria	p__Actinobacteria	c__Actinobacteria	o__Micrococcales	f__Dermabacteraceae	g__Brachybacterium	Ambiguous_taxa	0	0	0	0	5	0	5	3	0	0	0	5	0	11	0	11	0	2	0	0	0	2	2	0	0	1	0	2	1	1	0	0	1	0	3	0	0	4	0	4	3	1
186da1dea65dd6a657ed5f28668081c6_rep;size=229;	k__Bacteria	p__Actinobacteria	c__Actinobacteria	o__Micrococcales	f__Micrococcaceae	g__Kocuria	g__Kocuria	18	0	0	0	0	0	2	0	0	0	0	0	0	13	0	41	1	3	0	0	0	0	0	0	2	3	0	3	0	0	11	0	1	0	3	2	0	0	0	7	2	2
3d17d6fa7dd98790c080080085b39458_rep;size=229;	Unassigned	Unassigned	Unassigned	Unassigned	Unassigned	Unassigned	Unassigned	0	0	0	0	0	1	0	0	0	0	0	0	0	0	0	0	0	0	0	0	1	0	0	0	0	0	0	0	0	7	0	2	1	6	0	0	0	0	0	0	0	0
7c675265f4cc41e2d70226896b8fd4da_rep;size=229;	Unassigned	Unassigned	Unassigned	Unassigned	Unassigned	Unassigned	Unassigned	0	0	39	0	0	0	0	11	0	0	0	1	0	0	0	0	0	0	0	0	0	37	0	0	0	0	118	0	0	0	0	0	0	0	0	0	0	0	0	0	0	4
d3ae2eabcd2290cfa11388f3d9305882_rep;size=228;	k__Bacteria	p__Firmicutes	c__Clostridia	o__Clostridiales	f__Ruminococcaceae	g__uncultured	s__uncultured bacterium	0	0	0	0	0	0	0	0	0	0	0	0	0	0	0	0	0	0	0	1	0	0	0	0	2	0	0	0	0	80	0	0	0	36	0	0	0	0	0	0	0	0
0237e3c45ccc967c8112fb05c117ac23_rep;size=228;	k__Bacteria	p__Proteobacteria	c__Alphaproteobacteria	o__Sphingomonadales	f__Sphingomonadaceae	g__Novosphingobium	Ambiguous_taxa	2	0	0	0	0	8	0	0	0	0	9	0	0	0	0	3	1	0	0	0	107	0	0	2	0	0	0	0	0	0	0	0	0	0	0	0	1	0	0	2	0	0
2776889a0a9c26c4ccff6cc46e352128_rep;size=228;	k__Bacteria	p__Proteobacteria	c__Alphaproteobacteria	o__Rhizobiales	f__Beijerinckiaceae	g__Methylobacterium	Ambiguous_taxa	0	0	0	0	0	31	0	0	2	0	0	0	0	0	17	0	0	0	9	1	2	0	0	0	3	0	0	0	0	1	0	0	0	1	0	0	0	0	0	0	0	0
00ff7d11498b7363f2ddaa78fb96fba8_rep;size=228;	k__Bacteria	p__Proteobacteria	c__Alphaproteobacteria	o__Rhizobiales	f__Xanthobacteraceae	f__Xanthobacteraceae	f__Xanthobacteraceae	0	154	0	0	0	0	0	0	0	0	0	0	0	0	0	0	0	0	0	1	0	0	0	0	0	0	0	0	5	0	0	2	1	1	0	0	0	0	0	0	0	0
efa98c673cef7e11e51b27d01167c2af_rep;size=227;	k__Bacteria	p__Firmicutes	c__Clostridia	o__Clostridiales	f__Peptostreptococcaceae	f__Peptostreptococcaceae	f__Peptostreptococcaceae	7	0	0	1	4	0	0	2	1	0	2	0	0	0	0	0	0	0	4	4	3	1	0	0	0	0	6	2	4	1	0	0	1	11	0	1	0	0	0	0	2	0
6429fa07d6f79f5596e289d99445a41c_rep;size=227;	k__Bacteria	p__Proteobacteria	c__Alphaproteobacteria	o__Rhodobacterales	f__Rhodobacteraceae	g__Paracoccus	Ambiguous_taxa	2	0	2	0	0	0	0	1	0	0	1	0	0	0	0	0	0	0	1	0	0	2	0	0	0	3	0	7	7	0	0	0	1	0	3	3	15	0	0	0	0	3
4777fdb54350caff2859a9489aecc7a2_rep;size=227;	k__Bacteria	p__Proteobacteria	c__Alphaproteobacteria	o__Rhizobiales	f__Beijerinckiaceae	g__Beijerinckia	Ambiguous_taxa	0	0	0	0	0	0	0	0	0	0	1	0	0	0	0	0	0	0	0	0	0	0	0	1	0	0	0	0	68	0	0	0	1	1	0	0	0	0	0	0	0	0
3172079579160c0a06b6f3dab911bd4f_rep;size=227;	k__Bacteria	p__Proteobacteria	c__Alphaproteobacteria	o__Rhizobiales	f__Beijerinckiaceae	g__Methylobacterium	Ambiguous_taxa	0	0	0	0	0	73	0	0	0	3	3	0	0	0	2	0	0	0	19	0	1	0	0	0	0	0	0	0	0	0	0	0	0	5	0	0	0	0	0	0	0	0
aa57b868b5bb27db0bbfa2c70651c1a6_rep;size=227;	Unassigned	Unassigned	Unassigned	Unassigned	Unassigned	Unassigned	Unassigned	0	1	0	1	0	4	0	0	1	0	52	0	0	0	2	0	0	0	3	0	25	0	0	1	0	0	0	0	0	0	0	0	3	0	0	0	0	0	0	0	0	0
73f3360b5fc0c7c24ed5deb81fa10d3f_rep;size=226;	Unassigned	Unassigned	Unassigned	Unassigned	Unassigned	Unassigned	Unassigned	0	1	0	4	0	6	0	0	3	0	4	0	0	0	0	0	8	0	15	6	7	0	0	0	0	0	0	0	0	0	0	1	1	0	1	3	1	0	0	0	0	0
82f52b17bdbf163e28c74dd7e86d9cf3_rep;size=226;	Unassigned	Unassigned	Unassigned	Unassigned	Unassigned	Unassigned	Unassigned	0	0	0	7	0	78	0	0	0	5	35	0	0	0	1	0	0	0	0	0	0	0	5	0	0	0	0	0	0	0	0	0	0	0	0	0	0	0	0	0	0	0
16a5e0bb9d49402620370cf84aa3fc1a_rep;size=225;	k__Bacteria	p__Firmicutes	c__Clostridia	o__Clostridiales	f__Clostridiaceae 1	g__Clostridium sensu stricto 10	g__Clostridium sensu stricto 10	0	0	0	0	0	0	0	0	0	1	0	1	0	0	0	0	0	0	0	52	0	0	0	0	0	1	0	0	0	57	0	0	0	98	1	0	0	0	0	0	0	0
82153135acbe7f98b1c13df7ec1ab027_rep;size=225;	Unassigned	Unassigned	Unassigned	Unassigned	Unassigned	Unassigned	Unassigned	0	0	0	2	0	0	0	0	0	0	0	0	0	0	0	3	0	0	72	0	0	0	0	0	0	0	0	0	0	0	0	0	0	0	0	0	0	0	0	0	0	0
855268c08209d32b4258a451b2c893f9_rep;size=225;	k__Bacteria	p__Actinobacteria	c__Actinobacteria	o__Micrococcales	f__Microbacteriaceae	g__Microbacterium	Ambiguous_taxa	4	0	0	0	0	0	0	2	0	0	0	8	0	0	0	0	0	10	0	0	0	1	6	0	1	9	2	7	5	1	4	0	1	0	9	1	4	7	0	1	2	1
46335d8d99fa7a7017f51cb6d65a2b08_rep;size=225;	k__Bacteria	p__Proteobacteria	c__Alphaproteobacteria	o__Sphingomonadales	f__Sphingomonadaceae	g__Sphingomonas	Ambiguous_taxa	5	0	0	0	0	5	0	0	1	0	42	0	0	0	0	2	0	0	7	0	34	0	0	0	0	0	0	1	0	0	0	0	2	0	0	0	0	0	0	1	0	0
e2e14995de4a2a7a662fbed8042b23b2_rep;size=224;	k__Bacteria	p__Cyanobacteria	c__Oxyphotobacteria	o__Chloroplast	f__Watanabea reniformis	g__Watanabea reniformis	s__Watanabea reniformis	0	0	0	0	0	0	0	0	0	1	0	0	0	0	0	0	0	0	0	0	0	0	0	0	0	0	0	0	0	0	0	0	0	0	0	0	33	0	0	0	0	0
7f9a5219f0eeb15535e0ab35b9f82313_rep;size=224;	Unassigned	Unassigned	Unassigned	Unassigned	Unassigned	Unassigned	Unassigned	0	0	15	0	0	0	1	27	0	0	0	8	0	0	0	0	0	1	0	0	0	67	0	0	1	0	52	0	0	0	2	0	0	0	0	2	0	0	0	0	0	25
cd1bbf05cfbe336b567d3dda1910da48_rep;size=224;	k__Bacteria	p__Actinobacteria	c__Actinobacteria	o__Micrococcales	f__Microbacteriaceae	g__Microbacterium	g__Microbacterium	3	2	1	3	0	0	0	0	0	0	0	10	3	2	0	0	0	5	0	0	0	2	4	1	4	3	0	0	8	0	5	5	2	1	1	7	0	0	3	3	1	0
cba7499336ad2519a9dd2ce7d219f162_rep;size=223;	k__Bacteria	p__Proteobacteria	c__Alphaproteobacteria	o__Rhizobiales	f__Beijerinckiaceae	g__alphaI cluster	Ambiguous_taxa	0	0	0	0	0	0	0	0	0	0	0	0	0	0	0	0	0	0	0	0	0	0	0	0	0	0	0	0	2	0	0	0	0	0	0	0	0	0	0	0	0	0
87755bb3b45ed73fd7b8858c06bd6908_rep;size=223;	Unassigned	Unassigned	Unassigned	Unassigned	Unassigned	Unassigned	Unassigned	4	0	0	0	1	0	0	0	0	0	1	0	0	0	0	2	1	0	1	0	1	0	2	0	1	0	0	5	4	0	0	0	5	0	1	3	3	0	0	0	1	0
82b0d6e35ef125aabf5df3a66eb0b4ae_rep;size=223;	k__Bacteria	p__Proteobacteria	c__Alphaproteobacteria	o__Sphingomonadales	f__Sphingomonadaceae	g__Sphingomonas	Ambiguous_taxa	2	0	0	6	0	26	0	0	1	0	3	0	0	0	108	0	1	0	0	0	0	0	0	0	0	0	0	0	0	0	0	0	0	0	0	0	0	0	0	0	0	0
3582da62d51374120a4d8b756769d496_rep;size=223;	Unassigned	Unassigned	Unassigned	Unassigned	Unassigned	Unassigned	Unassigned	0	5	7	0	0	0	0	1	0	0	0	4	0	0	0	0	1	2	0	0	0	1	1	1	0	0	9	0	1	0	3	0	0	0	0	2	0	1	0	0	2	3
8083b27ce94123288aa9cff7c3679db0_rep;size=222;	Unassigned	Unassigned	Unassigned	Unassigned	Unassigned	Unassigned	Unassigned	2	0	0	2	0	0	0	0	0	1	0	0	0	0	0	2	0	0	68	0	0	0	0	0	1	0	0	1	0	0	0	0	0	1	0	3	1	0	0	5	0	0
8c71a1aa20c31cf9f4f05f38c29a6c19_rep;size=221;	k__Bacteria	p__Actinobacteria	c__Actinobacteria	o__Micrococcales	f__Intrasporangiaceae	f__Intrasporangiaceae	f__Intrasporangiaceae	2	0	0	0	0	0	7	1	0	0	0	0	0	8	0	5	0	3	0	0	0	0	1	0	0	3	5	0	0	0	12	0	0	0	7	5	3	0	0	6	1	1
fc2c72eedc4db19f5b675b79f0ec56db_rep;size=221;	Unassigned	Unassigned	Unassigned	Unassigned	Unassigned	Unassigned	Unassigned	2	0	10	0	0	0	2	9	0	0	0	0	0	1	0	3	2	6	0	0	0	26	0	1	1	0	43	2	0	0	2	0	1	0	0	5	0	0	0	5	1	3
ea7301875b1c2162a05bcfdf88bfcf97_rep;size=221;	k__Bacteria	p__Proteobacteria	c__Alphaproteobacteria	o__Acetobacterales	f__Acetobacteraceae	g__Roseococcus	g__Roseococcus	0	39	0	2	0	3	0	0	1	0	0	0	0	1	0	0	0	0	0	8	0	0	0	0	6	0	0	0	14	0	0	1	2	3	0	6	0	0	0	1	0	0
63319b91ea4acf3ca7079337dd9a4861_rep;size=221;	k__Bacteria	p__Firmicutes	c__Bacilli	o__Lactobacillales	f__Enterococcaceae	g__Enterococcus	g__Enterococcus	0	0	0	0	0	0	0	0	0	0	0	0	0	0	0	0	0	0	0	0	0	0	0	0	0	0	0	0	0	0	0	0	0	0	0	0	0	0	0	0	0	0
56d01617fa53e1f67b89f86564c3ba4c_rep;size=221;	Unassigned	Unassigned	Unassigned	Unassigned	Unassigned	Unassigned	Unassigned	4	0	0	5	0	0	0	1	0	0	0	0	0	0	0	0	12	0	0	1	0	8	0	0	1	1	0	1	6	0	1	0	3	0	0	2	11	0	0	0	0	2
67ec272218df56ae2a0d09f2f7cfc665_rep;size=221;	Unassigned	Unassigned	Unassigned	Unassigned	Unassigned	Unassigned	Unassigned	0	0	0	2	1	0	0	0	0	0	4	0	0	2	0	2	2	1	0	0	0	0	3	0	0	1	0	5	0	0	0	0	1	0	0	2	5	0	0	10	1	1
bdc958e9493582f28e619cdd6a327628_rep;size=220;	Unassigned	Unassigned	Unassigned	Unassigned	Unassigned	Unassigned	Unassigned	7	0	0	2	0	0	0	1	0	0	3	0	13	0	0	1	0	0	0	0	0	0	5	43	1	0	0	0	1	0	8	0	0	0	0	0	0	0	0	1	4	0
dea4117f381cdfa9ce29c3cc9c3c295a_rep;size=220;	Unassigned	Unassigned	Unassigned	Unassigned	Unassigned	Unassigned	Unassigned	26	0	4	0	0	0	0	0	0	0	0	0	0	0	0	1	0	0	0	0	0	0	0	2	1	0	0	2	0	0	0	0	0	0	0	2	0	0	0	0	0	0
a192ee10a95e4a4907845fbe81cf15b2_rep;size=220;	k__Bacteria	p__Proteobacteria	c__Gammaproteobacteria	o__Pseudomonadales	f__Moraxellaceae	g__Acinetobacter	Ambiguous_taxa	0	0	0	0	0	0	0	0	0	0	0	0	0	0	0	0	0	0	0	0	0	0	0	0	0	0	0	0	0	0	0	0	0	0	0	0	0	0	0	0	0	0
43f80b26424d4bff3f7a06da6b0ce064_rep;size=220;	Unassigned	Unassigned	Unassigned	Unassigned	Unassigned	Unassigned	Unassigned	13	0	0	0	0	0	0	0	0	0	0	0	0	0	0	6	0	0	0	0	0	0	0	0	0	1	3	0	0	0	7	0	2	0	2	3	3	1	1	2	5	2
1b93270bef9e284bd4e27fa020cd0870_rep;size=219;	Unassigned	Unassigned	Unassigned	Unassigned	Unassigned	Unassigned	Unassigned	14	1	0	0	0	1	0	0	0	0	0	0	0	0	0	0	1	0	4	0	2	0	0	0	1	0	0	7	1	0	1	0	3	0	1	3	4	0	0	1	1	0
5b148875866c5809e2400687803cc8d2_rep;size=219;	k__Bacteria	p__Actinobacteria	c__Actinobacteria	o__Micrococcales	f__Micrococcaceae	f__Micrococcaceae	f__Micrococcaceae	5	0	4	0	0	1	0	0	0	2	5	0	0	0	0	1	3	0	0	0	4	1	0	1	6	0	0	2	0	0	2	3	15	0	0	0	4	0	0	2	0	0
1eb31bddf34c9f5e08910343582ea24b_rep;size=219;	Unassigned	Unassigned	Unassigned	Unassigned	Unassigned	Unassigned	Unassigned	1	4	0	0	0	9	0	0	0	0	0	0	0	0	0	0	0	0	1	0	4	0	0	0	0	0	0	1	1	2	0	0	1	0	0	4	3	0	0	0	0	0
2ac6e834e692e22a79e30dd639f055e8_rep;size=218;	k__Bacteria	p__Firmicutes	c__Bacilli	o__Bacillales	f__Family XII	g__Exiguobacterium	g__Exiguobacterium	0	2	8	3	0	0	0	5	0	0	1	2	0	3	0	2	1	1	0	0	0	6	3	0	1	0	13	0	0	2	0	0	0	0	0	2	0	0	1	0	0	6
49b6f857951c66ffc245707b5d9bde7c_rep;size=218;	Unassigned	Unassigned	Unassigned	Unassigned	Unassigned	Unassigned	Unassigned	0	0	0	0	0	0	0	0	0	0	0	0	0	0	0	0	0	0	0	0	0	0	0	0	0	0	0	0	0	0	0	0	0	0	0	0	0	0	0	0	0	0
7d70934d55a6915e9532e3ee4629ca68_rep;size=218;	Unassigned	Unassigned	Unassigned	Unassigned	Unassigned	Unassigned	Unassigned	0	0	0	6	0	28	0	1	0	0	51	0	0	0	2	1	0	0	18	0	0	0	0	0	0	0	0	0	0	0	0	0	1	0	0	0	0	0	0	0	0	0
a8de9cdcc0916f89632550e63ee3ac4f_rep;size=218;	Unassigned	Unassigned	Unassigned	Unassigned	Unassigned	Unassigned	Unassigned	0	0	0	0	0	0	0	3	0	0	0	2	0	0	0	1	0	4	0	0	0	5	0	0	2	9	6	5	0	0	8	0	1	0	7	3	2	2	0	2	0	10
b86cb6668146907866c66d9aa0f43bf9_rep;size=217;	Unassigned	Unassigned	Unassigned	Unassigned	Unassigned	Unassigned	Unassigned	5	0	1	0	0	0	0	10	0	0	0	0	0	3	0	0	0	2	0	0	0	4	0	1	1	1	1	8	4	0	6	0	0	1	8	2	1	0	0	0	0	4
b2c7f041de049bf2616f5efb52db4ca2_rep;size=217;	k__Bacteria	p__Firmicutes	c__Clostridia	o__Clostridiales	f__Eubacteriaceae	g__Alkalibacter	s__uncultured bacterium	0	0	0	2	8	0	0	0	0	0	0	1	0	1	0	0	0	1	4	24	2	0	0	0	0	2	1	1	0	3	1	1	7	30	1	0	4	0	1	0	0	1
4fda16cb355eb9d96339bd7f800897e7_rep;size=217;	Unassigned	Unassigned	Unassigned	Unassigned	Unassigned	Unassigned	Unassigned	19	0	0	0	0	0	1	0	0	0	0	0	0	0	0	0	1	0	0	0	0	0	0	1	1	0	0	1	7	0	5	0	2	0	1	0	2	0	1	0	0	0
94f8e8c07dd7affc4dc4d19faae0e574_rep;size=217;	k__Bacteria	p__Proteobacteria	c__Alphaproteobacteria	o__Sphingomonadales	f__Sphingomonadaceae	g__Sphingomonas	g__Sphingomonas	3	0	0	0	0	4	0	0	6	8	8	0	0	0	2	1	4	0	24	0	8	0	0	0	0	0	0	0	0	0	0	0	2	0	0	0	0	0	0	0	0	0
be09a6ce3a8e166eb3a1eeaeda49979c_rep;size=217;	Unassigned	Unassigned	Unassigned	Unassigned	Unassigned	Unassigned	Unassigned	3	0	0	0	1	0	0	1	0	0	0	0	0	1	1	0	1	1	0	0	0	0	1	0	3	0	0	4	3	0	1	0	4	1	0	7	5	0	0	0	0	1
4f9a8870e5930b18bd243fce3ea96ba5_rep;size=217;	Unassigned	Unassigned	Unassigned	Unassigned	Unassigned	Unassigned	Unassigned	2	0	0	0	0	0	0	0	0	0	1	0	0	0	0	2	1	1	0	0	0	0	1	2	2	0	2	2	2	0	1	0	2	1	0	6	2	0	0	0	2	1
b039b0734ce23b913882f5bf094bede2_rep;size=216;	k__Bacteria	p__Actinobacteria	c__Actinobacteria	o__Micrococcales	Ambiguous_taxa	Ambiguous_taxa	Ambiguous_taxa	0	0	1	0	1	0	0	1	0	0	0	4	0	12	0	6	0	7	0	0	0	22	0	0	0	3	3	2	1	0	1	0	0	0	1	4	2	0	0	32	0	2
2b702e399243eada4b18b2320953c5d2_rep;size=216;	k__Bacteria	p__Proteobacteria	c__Alphaproteobacteria	o__Rhodobacterales	f__Rhodobacteraceae	g__Paracoccus	g__Paracoccus	45	0	0	0	0	0	0	2	0	1	0	0	0	2	0	0	0	0	0	0	0	2	0	0	1	0	0	9	1	0	7	0	0	0	2	1	4	0	0	1	0	0
9104c4b42757f253f35768d341c2a32b_rep;size=215;	k__Bacteria	p__Proteobacteria	c__Gammaproteobacteria	o__Enterobacteriales	f__Enterobacteriaceae	g__Serratia	g__Serratia	1	0	0	0	0	0	0	0	77	0	0	0	0	0	0	0	0	0	0	0	0	0	0	0	0	0	0	0	0	0	0	0	2	0	0	0	1	0	0	0	0	0
66ad0293a320e88a2483c172b38ef7ac_rep;size=215;	k__Bacteria	p__Proteobacteria	c__Gammaproteobacteria	o__Enterobacteriales	f__Enterobacteriaceae	g__Klebsiella	g__Klebsiella	0	0	0	0	0	1	0	0	6	1	1	0	0	0	0	0	0	1	2	0	10	0	0	0	0	0	0	2	0	16	0	0	3	0	0	0	1	0	0	0	0	0
a235842fb1e1fe8393bcc8dec6073df7_rep;size=214;	k__Bacteria	p__Proteobacteria	c__Alphaproteobacteria	o__Rhodobacterales	f__Rhodobacteraceae	g__uncultured	g__uncultured	0	0	0	0	1	0	2	0	0	0	0	0	0	0	0	0	0	0	0	0	0	0	0	0	0	0	0	0	0	1	0	0	0	0	0	128	0	0	0	0	0	0
f489fbe53febd1324e39973a0a81e2b2_rep;size=214;	k__Bacteria	p__Actinobacteria	c__Actinobacteria	o__Micrococcales	f__Micrococcaceae	f__Micrococcaceae	f__Micrococcaceae	4	0	0	3	1	0	0	3	0	0	0	1	2	0	0	0	0	0	0	0	0	4	2	0	0	2	1	10	0	0	0	0	1	0	4	0	6	2	0	0	1	3
1dbeef594ac42eb02c2d5abed5915ba8_rep;size=214;	Unassigned	Unassigned	Unassigned	Unassigned	Unassigned	Unassigned	Unassigned	0	0	0	0	0	5	0	0	1	0	64	0	0	0	0	0	0	0	40	2	5	0	0	0	1	0	0	0	0	1	0	0	2	0	0	0	0	0	0	0	0	0
54c02f4450694e1a1ce3b44b8e5c456a_rep;size=214;	k__Bacteria	p__Proteobacteria	c__Alphaproteobacteria	o__Sphingomonadales	f__Sphingomonadaceae	g__Sphingomonas	Ambiguous_taxa	4	0	0	0	8	0	0	2	0	3	1	0	0	3	0	5	0	0	0	0	1	0	0	0	6	0	0	7	0	1	0	0	1	0	0	0	6	0	1	4	0	0
63566652af02af70e1a50c6daa3d90c7_rep;size=213;	k__Bacteria	p__Proteobacteria	c__Alphaproteobacteria	o__Acetobacterales	f__Acetobacteraceae	f__Acetobacteraceae	f__Acetobacteraceae	0	0	0	0	0	0	0	0	0	0	0	0	0	0	0	0	0	0	0	0	0	0	0	0	0	0	0	0	0	0	0	0	0	0	0	0	0	9	0	0	0	0
8859fe7a1ae95d1d57d5b07d801ca9d9_rep;size=213;	k__Bacteria	p__Actinobacteria	c__Actinobacteria	o__Micrococcales	f__Microbacteriaceae	f__Microbacteriaceae	f__Microbacteriaceae	4	0	0	0	1	0	0	0	0	0	0	0	0	0	0	2	0	4	0	0	0	1	0	0	0	0	0	2	0	0	0	3	0	0	2	1	0	4	1	3	2	0
474383dd87a23a6ff3d656cbe124d48b_rep;size=213;	k__Bacteria	p__Actinobacteria	c__Actinobacteria	o__Micrococcales	f__Microbacteriaceae	f__Microbacteriaceae	f__Microbacteriaceae	1	0	0	0	0	0	2	0	0	0	1	9	0	3	0	0	0	6	0	0	0	0	0	0	0	1	0	0	3	9	2	0	0	53	4	0	0	0	6	0	7	0
146cfcc24b0c0436d3d750fd18343213_rep;size=213;	Unassigned	Unassigned	Unassigned	Unassigned	Unassigned	Unassigned	Unassigned	0	0	0	1	0	2	0	0	2	0	31	0	0	0	0	1	3	0	38	1	6	0	0	0	0	0	0	1	0	0	0	1	4	0	0	2	0	0	0	1	0	0
fc672ff88dc475b143532167712d4329_rep;size=212;	k__Bacteria	p__Proteobacteria	c__Alphaproteobacteria	o__Caulobacterales	f__Caulobacteraceae	g__Caulobacter	g__Caulobacter	0	0	0	0	0	0	25	2	0	0	0	0	0	0	0	3	3	0	0	10	0	0	2	0	2	0	0	2	10	1	0	1	0	0	0	5	4	2	1	7	0	0
c516351f4621ef0d57a6c0dfebec0686_rep;size=212;	k__Bacteria	p__Proteobacteria	c__Alphaproteobacteria	o__Rhizobiales	f__Xanthobacteraceae	g__Xanthobacter	Ambiguous_taxa	0	99	0	0	0	0	0	0	0	0	0	0	0	0	0	0	0	0	0	0	0	0	0	0	0	0	0	0	2	0	0	0	0	0	0	0	0	0	0	0	0	0
393fba756c6919d2fa16879f3f0e97a6_rep;size=212;	k__Bacteria	p__Proteobacteria	c__Gammaproteobacteria	o__Alteromonadales	f__Alteromonadaceae	g__Rheinheimera	g__Rheinheimera	0	0	1	0	0	0	1	0	0	0	0	3	0	3	0	0	0	0	0	0	0	2	0	0	1	0	9	66	1	0	7	0	1	0	0	1	2	0	0	0	19	5
a8be5c37787c4bf29fcfc34ea3a47739_rep;size=212;	k__Bacteria	p__Actinobacteria	c__Actinobacteria	o__Micrococcales	f__Micrococcaceae	g__Kocuria	g__Kocuria	2	0	0	0	0	0	1	0	0	0	0	0	0	2	0	2	0	1	0	0	0	0	7	0	3	16	0	6	2	0	0	0	9	0	2	1	6	0	0	2	4	0
f45be9fc619c4278f058364583c87715_rep;size=212;	Unassigned	Unassigned	Unassigned	Unassigned	Unassigned	Unassigned	Unassigned	8	0	0	1	0	0	2	1	0	0	0	1	0	3	0	16	1	0	0	0	1	0	0	2	1	0	2	2	9	0	6	0	1	0	0	2	0	0	0	2	2	5
e535d8dc0a417d6c4005e1eacb790cfa_rep;size=212;	k__Bacteria	p__Proteobacteria	c__Gammaproteobacteria	o__Betaproteobacteriales	f__Burkholderiaceae	g__Massilia	g__Massilia	0	0	0	20	0	2	2	1	1	0	0	0	0	0	0	7	7	0	9	0	0	3	3	0	1	0	0	0	0	1	0	3	8	0	0	0	0	0	0	0	0	1
42d177a6609b1318237b362ece6a4285_rep;size=211;	k__Bacteria	p__Actinobacteria	c__Actinobacteria	o__Propionibacteriales	f__Propionibacteriaceae	g__Propioniciclava	s__Propioniciclava sp. SCSIO 13291	0	0	0	0	1	0	0	5	1	0	0	24	0	10	0	3	0	12	0	0	0	1	12	0	0	3	0	0	2	0	1	0	0	1	10	0	0	3	0	7	5	2
253c92c394ef4ff64b9d1bb820c88dec_rep;size=211;	k__Bacteria	p__Proteobacteria	c__Alphaproteobacteria	o__Acetobacterales	f__Acetobacteraceae	g__Roseomonas	g__Roseomonas	2	0	0	0	0	0	0	0	0	0	0	0	0	0	0	6	0	0	0	0	1	0	0	0	0	0	0	1	2	0	2	0	2	2	0	0	0	0	0	6	2	0
df98d112ece63ffcd82c2d9e8cc0c287_rep;size=211;	Unassigned	Unassigned	Unassigned	Unassigned	Unassigned	Unassigned	Unassigned	2	0	1	0	1	0	1	0	0	0	0	0	0	5	0	0	0	2	0	0	1	0	1	0	14	1	2	11	0	0	0	1	9	0	0	1	2	0	1	3	0	4
b02a8d33d018119dedb2db15db887bfd_rep;size=210;	k__Bacteria	p__Actinobacteria	c__Actinobacteria	o__Propionibacteriales	f__Propionibacteriaceae	g__Cutibacterium	s__uncultured bacterium	0	0	0	0	0	0	1	0	0	0	0	4	0	3	0	0	0	2	0	0	0	0	1	0	0	1	0	1	0	0	0	0	1	0	1	0	0	0	0	0	0	0
e63160cc5645e573194a9053ca43aaca_rep;size=210;	k__Bacteria	p__Patescibacteria	c__Saccharimonadia	o__Saccharimonadales	o__Saccharimonadales	o__Saccharimonadales	o__Saccharimonadales	0	24	0	0	0	0	0	0	1	0	0	1	0	0	0	0	0	0	0	2	0	1	0	0	0	0	0	0	8	4	0	0	0	1	0	0	0	0	8	0	0	0
3af8db9706916eb090334509699bf255_rep;size=210;	k__Bacteria	p__Actinobacteria	c__Actinobacteria	o__Micrococcales	f__Micrococcaceae	g__Kocuria	Ambiguous_taxa	0	1	19	0	0	0	0	12	0	0	0	22	0	0	0	0	4	3	0	0	0	28	0	0	0	0	63	0	1	0	2	0	0	1	0	2	0	0	0	0	2	9
bb5ca6b770e894401017fe0d31ee8e3f_rep;size=210;	Unassigned	Unassigned	Unassigned	Unassigned	Unassigned	Unassigned	Unassigned	0	0	2	0	0	0	1	9	0	0	0	1	0	0	0	4	0	3	0	0	0	7	3	1	3	8	3	7	0	1	1	0	1	0	4	1	1	3	0	0	0	11
09a3cc1847ed3b4986b487db2ea86885_rep;size=210;	Unassigned	Unassigned	Unassigned	Unassigned	Unassigned	Unassigned	Unassigned	0	0	0	0	0	0	0	0	0	0	0	0	0	0	0	0	0	0	0	0	0	0	0	0	0	0	0	1	0	0	0	0	0	0	0	0	0	0	0	0	0	0
7be06bdee5cdf03ca8a45cac23880bfb_rep;size=210;	k__Bacteria	p__Firmicutes	c__Bacilli	o__Bacillales	f__Family XII	g__Exiguobacterium	g__Exiguobacterium	0	0	16	0	0	0	0	15	0	0	0	3	0	0	0	0	0	0	0	0	0	38	0	0	0	0	85	0	0	1	3	1	0	0	0	1	0	0	0	0	0	25
eb1260f49befa40d5b83f2c73d0f37cb_rep;size=210;	Unassigned	Unassigned	Unassigned	Unassigned	Unassigned	Unassigned	Unassigned	0	0	0	0	0	0	6	0	0	0	0	0	0	0	0	2	0	0	0	0	0	0	0	0	1	0	0	1	2	0	0	0	0	0	0	0	1	0	0	2	0	1
af70e8d1d161e47b578507c1d224a8d6_rep;size=210;	Unassigned	Unassigned	Unassigned	Unassigned	Unassigned	Unassigned	Unassigned	1	0	0	0	0	0	3	0	0	2	0	0	0	0	0	6	0	0	1	0	0	0	0	0	3	0	0	2	0	0	0	0	1	0	0	13	0	0	0	0	1	0
4c53f7386beee109b3ed37b9a9cabb64_rep;size=209;	k__Bacteria	p__Proteobacteria	c__Alphaproteobacteria	o__Rhizobiales	f__Rhizobiaceae	g__Phyllobacterium	s__uncultured Mesorhizobium sp.	0	1	0	0	0	0	3	0	0	0	0	0	0	0	11	23	0	0	0	0	0	0	0	0	0	0	0	0	0	0	0	0	0	0	0	4	0	0	0	0	0	0
82a589eaeb834373afdb50b4153a8cd0_rep;size=209;	k__Bacteria	p__Proteobacteria	c__Alphaproteobacteria	o__Sphingomonadales	f__Sphingomonadaceae	g__Sphingomonas	Ambiguous_taxa	0	6	0	0	0	0	0	0	0	0	1	0	0	0	0	0	5	1	0	12	0	1	0	2	0	0	0	1	10	0	0	1	0	1	0	0	1	0	2	0	0	0
159fae4afe8e6673458db7540ce50bde_rep;size=209;	Unassigned	Unassigned	Unassigned	Unassigned	Unassigned	Unassigned	Unassigned	2	0	2	0	1	0	1	2	0	0	0	0	0	1	0	6	0	9	0	0	0	2	0	0	0	2	3	1	3	0	1	0	1	1	4	28	3	2	0	3	0	1
f594dee934779dc3fdc7a9955eefe8ec_rep;size=208;	k__Bacteria	p__Actinobacteria	c__Actinobacteria	o__Micrococcales	f__Micrococcaceae	g__Paenarthrobacter	g__Paenarthrobacter	11	0	2	1	0	0	0	1	0	0	0	1	0	0	0	1	3	0	0	0	4	2	0	0	2	2	5	4	1	0	4	0	6	0	1	3	3	1	0	3	1	1
15751db9cc09037cec4973ad7b091471_rep;size=208;	Unassigned	Unassigned	Unassigned	Unassigned	Unassigned	Unassigned	Unassigned	1	0	1	4	0	13	0	0	0	0	2	0	0	0	0	1	2	0	1	0	2	0	1	1	0	0	0	1	1	0	0	2	0	0	0	1	0	0	0	0	0	0
549be2d7e575ed5024c181db9fd50722_rep;size=208;	k__Bacteria	p__Actinobacteria	c__Actinobacteria	o__Micrococcales	o__Micrococcales	o__Micrococcales	o__Micrococcales	1	0	0	0	0	0	5	2	0	0	0	2	0	2	0	3	1	6	0	0	0	3	1	0	1	7	2	0	3	0	6	0	0	9	8	5	0	1	1	1	4	5
99f84a57c6e9bf81270cbae70daddf12_rep;size=208;	Unassigned	Unassigned	Unassigned	Unassigned	Unassigned	Unassigned	Unassigned	3	0	0	1	0	0	0	2	0	0	0	0	1	4	0	1	0	6	0	0	0	0	1	0	0	0	0	5	1	0	2	0	2	0	1	2	2	1	0	2	1	1
9256ee486b5dabd50e9be3795a83ed2a_rep;size=207;	k__Bacteria	p__Actinobacteria	c__Actinobacteria	o__Micrococcales	f__Micrococcaceae	f__Micrococcaceae	f__Micrococcaceae	0	0	15	0	0	0	10	5	0	0	0	5	3	1	0	0	2	5	0	0	0	12	0	0	0	0	37	0	0	0	5	2	0	2	0	0	0	0	0	0	30	1
8b5af42e30fb434e1b9c05013c261439_rep;size=207;	k__Bacteria	p__Proteobacteria	c__Gammaproteobacteria	o__Enterobacteriales	f__Enterobacteriaceae	f__Enterobacteriaceae	f__Enterobacteriaceae	0	0	0	0	1	0	0	0	0	0	0	0	0	0	0	0	0	0	0	0	0	0	0	0	0	0	0	2	1	1	2	0	0	0	0	0	1	0	2	0	0	0
25727375e4d6d1754b28d646db77f977_rep;size=207;	Unassigned	Unassigned	Unassigned	Unassigned	Unassigned	Unassigned	Unassigned	9	0	0	3	0	0	0	2	2	0	0	0	0	0	0	7	0	0	4	0	0	0	0	0	0	0	1	8	0	0	0	0	0	1	0	9	1	0	0	16	0	2
e8e41ead593229ac9f186a6f81ebc1b8_rep;size=207;	Unassigned	Unassigned	Unassigned	Unassigned	Unassigned	Unassigned	Unassigned	15	0	4	0	0	0	0	5	0	0	0	4	0	0	0	0	1	6	0	0	1	16	0	2	1	1	17	5	0	0	3	0	0	0	0	0	6	0	0	2	1	8
c8a200ad3eacfe466e76ea33691f0e72_rep;size=206;	Unassigned	Unassigned	Unassigned	Unassigned	Unassigned	Unassigned	Unassigned	0	0	0	2	0	4	0	0	3	25	12	0	0	0	4	0	0	0	18	1	1	0	0	0	2	0	0	0	0	0	0	0	0	0	0	0	0	1	0	0	0	0
0fe8eaa9c9168886afd6026873235a48_rep;size=206;	k__Bacteria	p__Cyanobacteria	c__Oxyphotobacteria	o__Nostocales	f__Chroococcidiopsaceae	g__Chroococcidiopsis SAG 2023	Ambiguous_taxa	0	0	0	0	0	0	0	0	0	0	0	1	0	6	0	0	0	0	0	0	0	0	0	0	5	0	0	0	1	0	0	0	8	0	0	0	0	0	0	0	0	2
8028e105f842d81c059b540fe5724d56_rep;size=206;	k__Bacteria	p__Proteobacteria	c__Gammaproteobacteria	o__Pseudomonadales	f__Pseudomonadaceae	g__Pseudomonas	g__Pseudomonas	0	0	1	8	0	0	1	0	0	0	0	0	0	5	0	2	7	0	0	0	0	0	0	0	0	0	0	0	0	0	0	0	0	0	0	0	0	0	0	0	0	3
193904459a1bf723bde9c3ca9954bee4_rep;size=206;	Unassigned	Unassigned	Unassigned	Unassigned	Unassigned	Unassigned	Unassigned	1	0	0	0	0	0	0	0	0	0	0	0	0	1	0	5	0	1	0	0	0	0	2	0	0	0	0	5	0	0	0	0	2	0	0	5	8	0	0	4	0	1
52b3ad43d2e32e2413c5edc214447b99_rep;size=206;	Unassigned	Unassigned	Unassigned	Unassigned	Unassigned	Unassigned	Unassigned	0	0	0	2	0	0	0	0	0	0	0	0	0	0	0	4	5	0	1	0	0	1	0	2	0	0	3	2	11	0	2	1	0	0	1	13	0	0	0	4	1	0
6e6b08e56f142c8b64211e84f3448a8b_rep;size=205;	k__Bacteria	p__Actinobacteria	c__Actinobacteria	o__Micrococcales	f__Micrococcaceae	f__Micrococcaceae	f__Micrococcaceae	1	2	9	0	0	1	3	6	0	0	0	5	0	1	0	1	0	4	0	0	0	20	0	1	1	1	16	1	0	5	2	0	0	1	0	1	1	0	0	0	6	7
f58d2aaf9c0cc1b7f80539d6c3f9e511_rep;size=205;	Unassigned	Unassigned	Unassigned	Unassigned	Unassigned	Unassigned	Unassigned	2	0	0	1	0	0	0	0	2	0	0	0	5	0	6	0	29	0	0	0	0	0	0	2	0	0	0	0	11	0	1	2	0	1	0	1	0	0	0	0	0	0
5f41587ba477992437c0958634ae21a6_rep;size=205;	Unassigned	Unassigned	Unassigned	Unassigned	Unassigned	Unassigned	Unassigned	5	1	1	4	0	0	0	1	3	0	0	0	0	0	0	1	0	3	2	0	6	0	1	0	1	0	1	2	1	0	3	0	1	0	2	5	4	0	0	0	1	1
c8cf511b1dee0d8d10e922fe5128be9c_rep;size=204;	k__Bacteria	p__Proteobacteria	c__Alphaproteobacteria	o__Rhizobiales	f__Devosiaceae	f__Devosiaceae	f__Devosiaceae	0	35	0	0	0	0	0	0	6	0	0	0	0	0	0	0	0	0	0	20	0	0	0	0	0	2	0	0	10	6	0	0	0	0	0	0	0	0	0	0	0	0
b03509817cf38d5623b1fd42ba958b81_rep;size=204;	Unassigned	Unassigned	Unassigned	Unassigned	Unassigned	Unassigned	Unassigned	0	0	0	4	0	0	0	0	2	0	0	0	0	0	0	0	0	0	88	0	0	0	0	0	0	0	0	0	0	0	0	0	0	0	0	1	0	0	0	2	0	0
8f58519a247c546d35c16e6ad7eb8057_rep;size=203;	k__Bacteria	p__Proteobacteria	c__Alphaproteobacteria	o__Acetobacterales	f__Acetobacteraceae	g__uncultured	g__uncultured	0	0	0	0	18	0	0	0	0	0	0	7	0	1	0	2	0	2	0	0	0	0	2	0	5	0	0	1	2	0	0	0	4	0	0	0	0	0	0	0	1	0
b874807867944cf775b080f7bb5c07c1_rep;size=203;	Unassigned	Unassigned	Unassigned	Unassigned	Unassigned	Unassigned	Unassigned	0	1	0	0	0	0	0	0	0	0	0	0	0	0	0	0	0	0	0	0	0	0	0	0	0	0	0	0	0	0	0	0	0	0	0	0	0	0	0	0	0	0
8a6f0227f67e9d7be6d53ab71941c6f5_rep;size=203;	k__Bacteria	p__Proteobacteria	c__Alphaproteobacteria	o__Rhodobacterales	f__Rhodobacteraceae	g__Paracoccus	g__Paracoccus	0	4	0	1	0	0	1	0	0	0	0	0	0	0	0	3	0	2	0	0	0	1	0	0	1	0	0	1	20	0	0	1	2	1	1	31	0	0	0	1	0	0
94791a480845a7dfacc4e4472331ed25_rep;size=202;	k__Bacteria	p__Proteobacteria	c__Gammaproteobacteria	o__Pseudomonadales	f__Moraxellaceae	g__Acinetobacter	s__uncultured bacterium	0	0	0	0	0	0	0	0	0	0	0	0	0	0	0	5	0	0	0	0	0	0	0	0	0	0	0	0	0	0	0	0	0	0	0	0	0	0	0	0	0	0
854750bea11f66578db88e55c0aaa97c_rep;size=202;	k__Bacteria	p__Proteobacteria	c__Gammaproteobacteria	o__Enterobacteriales	f__Enterobacteriaceae	f__Enterobacteriaceae	f__Enterobacteriaceae	1	0	5	13	0	0	0	0	0	0	0	0	0	1	0	0	1	0	0	0	0	0	0	0	2	0	0	0	0	0	0	0	0	0	0	0	0	0	0	0	2	0
4f8ac117082ce04fae772e967043c156_rep;size=202;	k__Bacteria	p__Proteobacteria	c__Gammaproteobacteria	o__Betaproteobacteriales	f__Burkholderiaceae	f__Burkholderiaceae	f__Burkholderiaceae	0	0	0	0	0	0	0	0	0	0	0	0	0	0	0	0	0	1	0	1	0	1	0	0	0	0	0	0	1	0	0	0	0	0	0	0	0	0	0	0	0	1
c59695345b5602de0e9f5ea2a86a886f_rep;size=202;	k__Bacteria	p__Actinobacteria	c__Actinobacteria	o__Micrococcales	f__Micrococcaceae	g__Nesterenkonia	Ambiguous_taxa	5	0	0	1	0	0	0	0	0	0	0	0	0	1	0	1	0	2	0	0	2	0	4	0	2	1	0	5	0	0	0	0	2	0	2	2	0	2	1	2	3	0
ebdf2137e3b2d930485e4043dc1ea211_rep;size=202;	Unassigned	Unassigned	Unassigned	Unassigned	Unassigned	Unassigned	Unassigned	9	0	2	0	0	0	3	5	0	0	0	0	0	0	0	3	1	3	0	0	0	7	0	0	0	2	14	3	0	0	5	0	0	0	4	5	4	0	1	2	0	7
afe49aa105747fa98317a2d29aa05c47_rep;size=201;	Unassigned	Unassigned	Unassigned	Unassigned	Unassigned	Unassigned	Unassigned	1	0	0	2	0	0	2	0	0	0	0	0	4	0	0	4	7	0	0	0	0	5	2	1	1	0	3	1	7	0	1	0	1	0	0	14	4	0	1	8	2	0
4549150a015a55a670372fc97a9a892e_rep;size=201;	k__Bacteria	p__Proteobacteria	c__Alphaproteobacteria	o__Sphingomonadales	f__Sphingomonadaceae	g__Altererythrobacter	Ambiguous_taxa	0	0	0	0	0	0	0	2	0	0	0	0	0	0	0	0	0	0	0	0	0	1	0	0	0	0	0	7	1	0	0	1	1	0	3	11	17	0	0	0	0	1
e6d87d951604c78f469bae9e5fea506f_rep;size=201;	k__Bacteria	p__Proteobacteria	c__Alphaproteobacteria	o__Sphingomonadales	f__Sphingomonadaceae	g__Sphingomonas	Ambiguous_taxa	0	0	0	1	0	7	0	0	0	0	1	0	0	0	144	0	0	0	3	0	1	0	0	0	0	0	0	0	0	1	0	0	0	1	0	0	0	0	0	0	0	0
8fca324632d9e6bbad5d669d74ddaf99_rep;size=201;	k__Bacteria	p__Firmicutes	c__Bacilli	o__Bacillales	f__Bacillaceae	g__Bacillus	Ambiguous_taxa	1	0	0	0	0	0	5	0	0	0	0	12	0	0	0	0	0	1	0	0	0	2	0	0	0	0	0	48	0	0	8	1	0	4	0	1	1	0	0	0	14	0
4a41b9210e0508a6eefe894e9f4e5d45_rep;size=201;	Unassigned	Unassigned	Unassigned	Unassigned	Unassigned	Unassigned	Unassigned	0	0	0	0	1	1	0	0	1	0	0	0	0	0	0	0	0	0	6	0	12	0	0	0	0	0	0	0	1	0	0	0	0	3	0	0	0	0	0	0	0	0
c3a394d736400f979fbbe27978f05f2f_rep;size=201;	k__Bacteria	p__Proteobacteria	c__Alphaproteobacteria	o__Sphingomonadales	f__Sphingomonadaceae	g__Sphingomonas	g__Sphingomonas	3	0	0	4	0	0	0	0	1	5	1	0	0	0	1	2	1	1	1	0	0	0	6	2	1	0	1	4	3	0	0	1	2	0	0	11	0	0	0	3	0	1
75bf05bc456598840445c24d67be6c8f_rep;size=201;	k__Bacteria	p__Proteobacteria	c__Alphaproteobacteria	o__Sphingomonadales	f__Sphingomonadaceae	g__Sphingomonas	g__Sphingomonas	1	0	0	1	0	2	0	0	1	0	4	0	0	0	0	0	0	0	0	0	116	0	0	0	1	0	0	0	0	0	0	0	3	0	0	0	6	0	0	0	0	0
6d58c2e2237b48c9abe1f9849e7dd45e_rep;size=200;	Unassigned	Unassigned	Unassigned	Unassigned	Unassigned	Unassigned	Unassigned	0	3	0	1	0	7	0	0	0	0	0	0	6	0	1	0	2	0	0	0	0	0	0	5	0	0	0	1	7	0	0	8	1	0	0	0	0	0	0	0	0	0
b4184e1afb6fe1e1de9e4ec5a9ad6c95_rep;size=200;	Unassigned	Unassigned	Unassigned	Unassigned	Unassigned	Unassigned	Unassigned	5	0	0	6	0	9	0	0	0	0	2	0	9	0	4	0	3	0	0	2	0	0	3	8	0	0	0	0	0	0	1	0	1	0	0	0	1	0	0	0	0	0
0ead4ca3374c061b21908d6d972a0b88_rep;size=200;	k__Bacteria	p__Proteobacteria	c__Alphaproteobacteria	o__Acetobacterales	f__Acetobacteraceae	f__Acetobacteraceae	f__Acetobacteraceae	0	0	0	0	0	0	6	0	0	0	0	1	0	1	0	8	0	23	0	0	0	0	0	0	4	0	4	2	47	0	0	0	1	0	2	1	0	0	2	0	0	5
fd199201ba9bb0bda4194be1eca6c347_rep;size=200;	Unassigned	Unassigned	Unassigned	Unassigned	Unassigned	Unassigned	Unassigned	0	0	1	0	0	0	0	6	0	0	0	6	0	0	0	0	0	0	0	0	0	1	1	1	0	29	1	0	29	0	1	0	0	2	10	1	0	3	0	0	0	4
24c5641f49523ab12c922ebd295dfcbe_rep;size=200;	k__Bacteria	p__Proteobacteria	c__Alphaproteobacteria	o__Rhodobacterales	f__Rhodobacteraceae	g__Paracoccus	g__Paracoccus	10	0	0	2	0	0	0	2	0	0	1	0	0	0	0	3	0	1	0	0	0	0	0	0	2	4	0	1	5	0	0	0	0	0	1	0	0	0	1	3	0	0
0c4161e662cca6a738a5f2a2de1ec0e4_rep;size=200;	k__Bacteria	p__Proteobacteria	c__Alphaproteobacteria	o__Rhizobiales	f__Beijerinckiaceae	g__Methylobacterium	Ambiguous_taxa	0	0	0	0	0	2	0	0	0	2	0	0	0	0	1	0	0	0	0	0	0	0	0	0	0	0	0	0	0	0	0	0	0	0	0	0	0	0	0	0	0	0
7b6f796abdb7d84ba41b725213ff701b_rep;size=199;	k__Bacteria	p__Proteobacteria	c__Alphaproteobacteria	o__Caulobacterales	f__Caulobacteraceae	g__Brevundimonas	g__Brevundimonas	0	6	0	0	0	0	0	0	0	0	0	0	0	0	0	0	0	0	0	0	0	2	0	0	0	0	0	0	6	0	0	0	0	0	0	0	0	0	0	0	0	0
4cdf8f7702b4667ef847dc85fb5c07af_rep;size=199;	k__Bacteria	p__Proteobacteria	c__Gammaproteobacteria	o__Betaproteobacteriales	f__Burkholderiaceae	g__Comamonas	g__Comamonas	0	2	0	0	0	0	1	0	0	0	0	0	0	0	0	0	40	0	0	17	0	0	13	46	0	0	0	0	0	0	4	0	0	0	0	0	0	1	0	0	0	0
e10cc996f37f25bebf0c2a4a8fcc7019_rep;size=199;	Unassigned	Unassigned	Unassigned	Unassigned	Unassigned	Unassigned	Unassigned	0	25	0	1	0	2	0	0	0	0	0	0	0	0	0	0	0	0	0	3	1	0	0	0	0	0	0	0	1	0	0	0	0	0	0	1	0	0	0	0	0	0
3344cee2dc4cb7c5cdad16010e3e8e65_rep;size=199;	k__Bacteria	p__Proteobacteria	c__Alphaproteobacteria	o__Rhizobiales	f__Devosiaceae	g__Devosia	g__Devosia	0	0	1	0	0	0	3	2	0	0	0	0	0	3	0	0	0	6	0	1	0	39	0	1	0	0	3	0	17	1	22	3	0	1	0	10	0	0	0	0	1	10
4d3b0ade2b27b6763cefdd4c640b784b_rep;size=199;	k__Bacteria	p__Proteobacteria	c__Alphaproteobacteria	o__Rhodobacterales	f__Rhodobacteraceae	g__Cereibacter	Ambiguous_taxa	0	0	0	0	0	5	0	0	0	0	0	0	0	0	0	0	0	10	0	0	0	0	0	0	0	0	0	0	0	0	0	0	3	0	0	7	1	0	0	0	0	12
10b250f7f6826cd56d348bc75d7ecc15_rep;size=199;	Unassigned	Unassigned	Unassigned	Unassigned	Unassigned	Unassigned	Unassigned	4	0	0	1	0	0	0	1	0	0	4	1	1	1	0	4	0	1	3	0	2	0	0	0	3	0	0	1	1	0	1	0	0	0	0	3	1	0	0	2	0	0
918e0d9d63bbbfec85f4cf122d48411f_rep;size=199;	Unassigned	Unassigned	Unassigned	Unassigned	Unassigned	Unassigned	Unassigned	1	3	0	0	0	0	3	0	0	0	0	0	0	0	0	0	2	0	0	1	0	0	0	0	0	0	0	1	3	0	2	2	0	0	0	8	0	0	1	0	0	0
2d003abc72f9e53816a27df394034ea8_rep;size=199;	k__Bacteria	p__Proteobacteria	c__Alphaproteobacteria	o__Rhizobiales	f__Beijerinckiaceae	g__Methylobacterium	Ambiguous_taxa	0	0	0	0	0	14	0	0	1	47	2	0	0	0	11	0	0	0	1	0	0	0	0	0	0	0	0	0	0	0	0	0	0	0	0	0	0	0	0	0	0	0
73a1c4189f874e7de6277b09f77812ad_rep;size=198;	k__Bacteria	p__Planctomycetes	c__Planctomycetacia	o__Gemmatales	f__Gemmataceae	g__Gemmata	s__uncultured bacterium	0	0	0	0	0	2	0	0	0	0	0	0	0	0	0	0	0	0	1	0	0	0	0	0	0	0	0	0	0	0	0	0	0	0	0	0	0	0	0	0	0	0
df1ceea7eb0df70078cd52fc99c86c7c_rep;size=198;	k__Bacteria	p__Proteobacteria	c__Alphaproteobacteria	o__Acetobacterales	f__Acetobacteraceae	f__Acetobacteraceae	f__Acetobacteraceae	0	0	0	0	0	0	151	0	0	0	0	0	0	0	0	0	0	0	0	0	0	0	0	0	0	0	0	0	0	0	0	0	1	0	0	0	0	0	0	0	0	0
3b482158f41d6a7f2df1dc4388b8e29f_rep;size=198;	k__Bacteria	p__Firmicutes	c__Clostridia	o__Clostridiales	f__Clostridiaceae 1	g__Clostridium sensu stricto 13	g__Clostridium sensu stricto 13	0	0	0	0	0	0	0	0	0	0	0	0	0	0	79	0	0	0	0	3	0	0	1	0	0	0	0	0	0	6	0	0	2	19	50	3	0	0	0	0	0	0
ec71a38f82d88f3a2adacb67b367ea4b_rep;size=198;	Unassigned	Unassigned	Unassigned	Unassigned	Unassigned	Unassigned	Unassigned	0	0	0	1	0	0	0	0	0	0	1	0	0	0	0	3	0	0	0	0	1	0	0	0	0	1	0	10	0	0	1	0	3	1	2	1	3	0	0	0	0	0
b2593213f8ef37b9d49ee652c13f98ac_rep;size=198;	Unassigned	Unassigned	Unassigned	Unassigned	Unassigned	Unassigned	Unassigned	0	2	0	2	0	0	0	0	2	0	2	0	0	0	1	1	1	0	0	0	0	0	0	0	2	0	0	2	7	0	2	0	2	0	0	0	1	0	0	0	4	0
01f51b0e2ab128f259ed0b04b4a22c49_rep;size=198;	k__Bacteria	p__Proteobacteria	c__Alphaproteobacteria	o__Rhodobacterales	f__Rhodobacteraceae	g__Paracoccus	Ambiguous_taxa	54	0	0	1	0	0	2	0	0	0	0	0	0	0	0	0	1	0	0	0	0	0	0	0	0	0	0	5	0	0	1	0	1	0	0	0	1	0	1	0	0	0
59d4c9759a35ac3031952b92c4fcb424_rep;size=198;	k__Bacteria	p__Proteobacteria	c__Alphaproteobacteria	o__Rhodobacterales	f__Rhodobacteraceae	f__Rhodobacteraceae	f__Rhodobacteraceae	2	0	0	1	0	0	0	2	1	0	0	0	1	0	0	2	0	0	0	0	0	0	0	0	2	0	0	12	0	0	0	0	3	0	0	0	7	0	0	0	0	1
e0884357b8951e32418c9391e1f936e4_rep;size=198;	Unassigned	Unassigned	Unassigned	Unassigned	Unassigned	Unassigned	Unassigned	8	0	0	0	0	0	0	2	0	1	0	0	0	1	1	10	0	0	0	0	0	0	1	0	1	1	0	12	0	0	0	0	1	0	4	2	2	0	0	13	0	1
d3517d5450240c0489104ccc22dcd0b9_rep;size=198;	Unassigned	Unassigned	Unassigned	Unassigned	Unassigned	Unassigned	Unassigned	1	3	0	0	0	4	1	0	6	0	0	0	0	0	0	0	11	0	2	0	22	0	0	0	3	0	0	4	2	3	0	0	2	0	0	4	1	0	0	0	2	0
4b5f59dd15d2a8ff6d5b7807ad2ff994_rep;size=198;	Unassigned	Unassigned	Unassigned	Unassigned	Unassigned	Unassigned	Unassigned	0	0	0	0	0	0	0	0	2	0	20	0	0	0	6	0	0	0	4	0	3	0	0	0	1	0	0	0	3	0	0	0	0	0	0	0	0	0	0	0	0	0
7e36c0d99c5acb80b33bb9ceb4321321_rep;size=197;	Unassigned	Unassigned	Unassigned	Unassigned	Unassigned	Unassigned	Unassigned	0	0	0	0	0	0	0	0	0	0	0	0	0	0	0	0	0	0	0	0	0	0	0	1	0	0	0	0	0	0	0	0	0	0	0	0	0	2	0	0	0	0
c3bc8551a66a24c0dbf9473bdd7038c2_rep;size=197;	Unassigned	Unassigned	Unassigned	Unassigned	Unassigned	Unassigned	Unassigned	0	0	0	5	0	0	0	2	0	0	0	0	7	1	0	1	0	0	0	0	0	0	6	17	0	0	0	2	1	0	8	2	4	0	0	1	2	0	0	8	0	0
00bf2966b9bded03dbc546166fc44dcc_rep;size=197;	Unassigned	Unassigned	Unassigned	Unassigned	Unassigned	Unassigned	Unassigned	8	0	0	0	0	0	2	0	0	0	0	0	0	0	0	2	1	0	2	0	1	0	0	1	1	2	0	6	6	0	1	1	1	0	1	2	6	0	0	4	1	2
00235b48d268a7d383254cf5a6c99ca7_rep;size=197;	Unassigned	Unassigned	Unassigned	Unassigned	Unassigned	Unassigned	Unassigned	3	0	3	0	0	0	2	13	0	0	0	0	0	0	0	1	0	2	0	0	0	0	0	0	0	2	2	2	2	0	3	0	0	0	2	4	0	0	0	2	1	9
1e9475620ba0da897de4b6cb7ae3a692_rep;size=197;	Unassigned	Unassigned	Unassigned	Unassigned	Unassigned	Unassigned	Unassigned	4	1	0	5	0	4	0	0	2	0	0	0	0	0	0	0	15	0	0	4	52	0	1	4	2	0	0	0	1	0	0	4	0	0	0	1	0	0	0	0	0	0
4e4697893f4eae2f9135bb143a1dd6ce_rep;size=197;	Unassigned	Unassigned	Unassigned	Unassigned	Unassigned	Unassigned	Unassigned	2	0	0	2	0	0	0	0	0	0	1	0	0	0	0	0	0	0	0	0	0	0	1	0	0	0	0	5	0	0	0	0	3	0	3	2	4	0	0	0	0	0
19454c104c392f2bd7f27dd0db5200c8_rep;size=197;	k__Bacteria	p__Proteobacteria	c__Alphaproteobacteria	o__Rhizobiales	f__Beijerinckiaceae	g__Methylobacterium	g__Methylobacterium	1	0	0	1	0	3	0	0	3	4	0	0	0	0	7	1	0	0	8	0	0	0	0	0	0	0	0	1	15	0	0	0	0	2	0	0	0	0	0	0	0	0
da40298cffd38dcf90a5a06dfe0c1216_rep;size=197;	Unassigned	Unassigned	Unassigned	Unassigned	Unassigned	Unassigned	Unassigned	7	2	0	0	0	7	0	0	0	0	0	0	1	0	7	4	8	0	0	0	0	0	0	0	3	0	0	8	0	0	0	1	0	1	0	0	5	0	0	0	0	0
7cc545513b577876408499db237e39cb_rep;size=196;	k__Bacteria	p__Proteobacteria	c__Alphaproteobacteria	o__Rhodobacterales	f__Rhodobacteraceae	f__Rhodobacteraceae	f__Rhodobacteraceae	1	0	0	0	0	0	0	0	0	0	0	0	0	0	0	0	0	0	0	0	0	0	0	0	0	0	0	0	0	0	0	2	0	0	0	0	0	0	0	0	0	0
fe65298506dbdc63b2328bb234dd0324_rep;size=196;	Unassigned	Unassigned	Unassigned	Unassigned	Unassigned	Unassigned	Unassigned	0	0	0	1	0	0	0	0	0	0	10	0	0	0	0	0	0	0	0	0	0	0	0	9	0	0	0	0	0	0	0	0	0	0	0	1	0	0	0	0	0	0
72137a1816f3a54a8f61d6eea560ace0_rep;size=195;	k__Bacteria	p__Proteobacteria	c__Alphaproteobacteria	o__Rhodobacterales	f__Rhodobacteraceae	f__Rhodobacteraceae	f__Rhodobacteraceae	0	0	0	0	0	0	0	0	0	0	0	0	0	0	0	0	0	0	0	50	0	0	0	1	0	0	0	0	14	0	0	2	7	0	0	0	0	0	0	0	0	0
d74a2ae17082b38701e54e0d48414b71_rep;size=195;	k__Bacteria	p__Deinococcus-Thermus	c__Deinococci	o__Deinococcales	f__Deinococcaceae	g__Deinococcus	Ambiguous_taxa	1	0	0	0	0	0	0	2	0	0	0	2	0	1	0	6	0	0	0	0	0	0	0	0	4	0	0	12	2	0	0	0	5	3	0	0	3	0	1	20	0	1
92c43301083460b6ca6615c7af08ac54_rep;size=195;	k__Bacteria	p__Bacteroidetes	c__Bacteroidia	o__Cytophagales	f__Microscillaceae	g__Flexibacter	s__uncultured bacterium	0	0	0	0	0	0	0	0	0	0	7	0	0	0	0	0	0	0	0	0	0	0	0	1	2	0	0	2	14	0	0	0	0	0	0	0	0	0	0	0	0	0
023cbd6f306cefc8b6162714198f8092_rep;size=195;	k__Bacteria	p__Proteobacteria	c__Alphaproteobacteria	o__Sphingomonadales	f__Sphingomonadaceae	g__Sphingomonas	Ambiguous_taxa	1	1	0	0	1	0	0	0	0	0	70	0	0	0	0	0	0	0	0	2	5	0	0	0	2	0	0	0	0	0	0	0	0	0	0	0	1	0	0	0	0	0
a32d6ce685381e57f9cc1500fa8e6a4c_rep;size=194;	k__Bacteria	p__Actinobacteria	c__Actinobacteria	o__Micrococcales	f__Micrococcaceae	f__Micrococcaceae	f__Micrococcaceae	0	0	0	0	1	0	0	0	0	0	0	50	0	58	0	0	0	0	0	0	0	0	2	0	1	0	0	0	0	0	0	0	0	0	0	1	0	11	0	0	0	0
1b43275cefce137278a991ae1049f842_rep;size=194;	k__Bacteria	p__Proteobacteria	c__Alphaproteobacteria	o__Rhizobiales	f__Beijerinckiaceae	g__1174-901-12	s__uncultured bacterium	2	0	0	7	0	0	0	2	28	0	0	0	0	0	0	2	0	7	2	0	0	0	1	0	0	0	0	0	1	0	0	0	1	0	0	0	1	0	0	1	0	0
3eb41e6c5cf43fd958d60fe7a15fa64d_rep;size=194;	k__Bacteria	p__Actinobacteria	c__Actinobacteria	o__Micrococcales	o__Micrococcales	o__Micrococcales	o__Micrococcales	0	0	0	0	0	0	0	0	0	0	0	2	0	0	0	0	0	0	0	0	0	0	0	0	0	0	0	0	0	0	0	0	0	0	0	0	0	0	0	0	0	0
71dc328c87e39524d98e1caf68e4ce28_rep;size=194;	k__Bacteria	p__Proteobacteria	c__Gammaproteobacteria	o__Betaproteobacteriales	f__Burkholderiaceae	f__Burkholderiaceae	f__Burkholderiaceae	0	0	0	0	0	4	0	0	0	0	0	0	19	0	0	6	0	0	2	0	0	0	0	0	4	0	0	5	0	0	5	0	0	0	0	3	1	0	0	0	0	1
c3e6adf451569e10f6b6847a13013f1f_rep;size=194;	Unassigned	Unassigned	Unassigned	Unassigned	Unassigned	Unassigned	Unassigned	2	0	0	0	0	0	0	0	0	1	1	0	0	1	0	24	0	0	0	0	7	0	0	0	0	0	0	3	0	0	1	0	1	0	0	3	3	0	0	13	0	0
5d350f50937a5b9d71141221f5b87351_rep;size=193;	k__Bacteria	p__Cyanobacteria	c__Oxyphotobacteria	o__Nostocales	f__Chroococcidiopsaceae	g__uncultured	s__uncultured bacterium	7	0	0	0	1	0	0	0	2	0	0	0	0	0	0	0	0	6	0	0	1	0	0	0	6	0	0	3	0	2	0	0	38	0	0	0	0	0	1	0	0	10
4f750b6e52624769941e01cf8662bc6d_rep;size=193;	Unassigned	Unassigned	Unassigned	Unassigned	Unassigned	Unassigned	Unassigned	0	0	0	0	0	0	0	0	0	0	0	0	0	0	0	0	0	0	0	0	0	0	0	0	0	0	0	0	0	0	0	0	0	0	0	0	0	0	0	0	0	0
b1060b33777f6fe9f817dcda61fcb10f_rep;size=193;	k__Bacteria	p__Actinobacteria	c__Actinobacteria	o__Micrococcales	f__Micrococcaceae	g__Kocuria	g__Kocuria	6	0	0	1	0	0	1	2	0	0	0	0	0	1	0	3	0	0	0	0	0	1	5	0	1	10	0	6	1	0	0	0	2	3	6	1	1	0	1	1	6	2
1b7a61e3803648e5ce2883cebc49f0d6_rep;size=193;	Unassigned	Unassigned	Unassigned	Unassigned	Unassigned	Unassigned	Unassigned	3	1	2	0	0	0	0	2	0	0	0	4	0	1	0	0	0	2	0	0	0	2	0	0	1	0	1	4	0	0	1	0	1	0	4	1	3	0	0	0	1	3
f32db3be66fbd632b3de632843693bf3_rep;size=193;	Unassigned	Unassigned	Unassigned	Unassigned	Unassigned	Unassigned	Unassigned	0	0	0	0	0	0	0	0	0	0	81	0	0	0	0	0	0	0	0	0	2	0	0	0	0	0	0	0	0	0	0	0	0	0	0	0	0	0	0	1	0	0
55b34b323722fc47fb334795e6d50454_rep;size=192;	Unassigned	Unassigned	Unassigned	Unassigned	Unassigned	Unassigned	Unassigned	1	0	1	0	0	0	33	0	0	0	0	0	0	0	0	5	0	1	0	0	0	0	0	0	2	0	0	1	2	0	3	0	0	0	0	66	0	0	0	3	0	0
78c9a7e4838b0e8250c44d1a52b7c004_rep;size=192;	k__Bacteria	p__Proteobacteria	c__Gammaproteobacteria	o__Betaproteobacteriales	f__Burkholderiaceae	g__Massilia	s__uncultured bacterium	0	0	0	24	0	0	0	0	0	0	0	0	0	0	0	1	6	0	7	1	0	0	0	1	0	0	0	4	0	0	0	2	3	0	0	1	0	0	0	2	0	0
aaa815491f037b768f6f166b12823ba8_rep;size=192;	k__Bacteria	p__Proteobacteria	c__Alphaproteobacteria	o__Sphingomonadales	f__Sphingomonadaceae	g__Sphingomonas	g__Sphingomonas	0	0	0	0	0	0	0	0	18	0	49	0	0	0	0	0	0	0	0	2	7	0	0	0	2	0	0	0	1	0	0	0	1	0	0	3	1	0	0	0	0	0
1ee2a2e257f4fc78b9c835456bb8da0f_rep;size=192;	Unassigned	Unassigned	Unassigned	Unassigned	Unassigned	Unassigned	Unassigned	12	0	0	0	0	0	0	0	0	0	0	0	0	2	0	0	0	0	1	0	0	0	0	0	3	0	0	13	3	0	6	4	3	0	0	6	5	0	0	10	0	1
31a35894cf5f474f926d39fe0bf0975a_rep;size=192;	k__Bacteria	p__Proteobacteria	c__Alphaproteobacteria	o__Sphingomonadales	f__Sphingomonadaceae	g__Sphingomonas	g__Sphingomonas	3	0	0	0	0	0	0	0	0	0	0	0	0	3	0	11	1	1	0	0	2	0	1	0	0	1	0	2	0	0	0	0	0	0	0	2	0	0	0	6	3	0
26cad7f89d2557a70eba2dd9a2fdd07c_rep;size=191;	Unassigned	Unassigned	Unassigned	Unassigned	Unassigned	Unassigned	Unassigned	6	0	0	0	1	0	1	4	0	0	0	0	0	4	0	32	0	2	0	0	0	0	1	0	0	1	0	3	1	0	7	0	1	0	1	0	0	0	0	5	5	3
d3af0ec3fb563be1730fa6a075f0c7f4_rep;size=191;	k__Bacteria	p__Proteobacteria	c__Gammaproteobacteria	o__Betaproteobacteriales	f__Burkholderiaceae	g__Variovorax	Ambiguous_taxa	0	7	1	6	0	0	0	2	0	0	0	1	0	0	0	1	5	0	0	13	3	14	0	0	1	1	0	0	1	0	1	1	0	1	1	2	0	0	7	1	0	0
a64e39b78086747c85008146bd6f8860_rep;size=191;	k__Bacteria	p__Actinobacteria	c__Actinobacteria	o__Corynebacteriales	f__Mycobacteriaceae	g__Mycobacterium	g__Mycobacterium	0	0	0	0	0	0	0	0	0	0	0	0	0	0	0	0	0	0	0	0	0	0	0	0	0	0	0	0	0	128	0	0	0	58	0	0	0	0	0	0	0	0
e4671976b3d14ea00f8991862a5bcd38_rep;size=191;	k__Bacteria	p__Firmicutes	c__Bacilli	o__Lactobacillales	f__Carnobacteriaceae	f__Carnobacteriaceae	f__Carnobacteriaceae	0	2	21	0	0	0	1	9	0	0	0	23	0	6	0	0	1	4	0	0	0	9	2	2	0	0	38	1	1	1	7	0	0	0	0	1	0	0	0	1	15	7
6446416cc0b932fe4a88da538ea530d2_rep;size=191;	Unassigned	Unassigned	Unassigned	Unassigned	Unassigned	Unassigned	Unassigned	0	0	0	1	0	8	0	1	4	0	0	0	0	0	0	0	2	0	2	3	2	0	7	0	0	0	0	0	8	0	0	0	0	0	0	0	0	0	0	0	0	0
87134e9153383acdca28ef686530f8c9_rep;size=191;	Unassigned	Unassigned	Unassigned	Unassigned	Unassigned	Unassigned	Unassigned	26	0	0	0	0	0	0	1	0	0	0	0	0	4	0	34	0	1	0	0	0	0	0	0	2	2	0	0	0	0	7	0	0	0	2	0	1	0	0	1	8	0
29c021c012df5c966cf430123fa6b0ec_rep;size=191;	Unassigned	Unassigned	Unassigned	Unassigned	Unassigned	Unassigned	Unassigned	0	0	0	0	1	0	0	0	5	0	0	0	0	0	0	0	0	0	0	70	0	0	0	0	0	0	0	0	0	7	0	0	3	9	0	0	0	0	1	0	0	0
a6b10b419c583b7ca502c9b9f0ce8b27_rep;size=191;	k__Bacteria	p__Proteobacteria	c__Alphaproteobacteria	o__Sphingomonadales	f__Sphingomonadaceae	g__Sphingomonas	Ambiguous_taxa	0	0	0	0	1	20	0	0	0	2	23	0	0	0	28	0	0	0	15	0	0	0	0	0	0	0	0	0	1	0	0	0	1	0	1	1	0	2	0	0	0	0
71036f555a8d209fceed359d670f5e68_rep;size=190;	k__Bacteria	p__Proteobacteria	c__Alphaproteobacteria	o__Acetobacterales	f__Acetobacteraceae	g__uncultured	s__uncultured bacterium	0	0	0	0	0	0	0	0	70	0	0	0	0	4	0	0	0	0	0	0	0	0	0	0	0	0	0	0	0	0	0	0	0	0	0	0	0	0	0	0	0	0
c38ec27cf9f204c497d1f2a0620adb21_rep;size=190;	k__Bacteria	p__Proteobacteria	c__Alphaproteobacteria	o__Sphingomonadales	f__Sphingomonadaceae	g__Sphingomonas	Ambiguous_taxa	2	0	0	0	0	1	0	0	0	0	49	0	0	0	0	0	0	0	0	0	3	0	0	0	0	0	0	4	0	0	0	0	2	0	0	0	0	0	0	0	0	0
03d2df22b96ce9401f87ae6f7bef5f8f_rep;size=190;	Unassigned	Unassigned	Unassigned	Unassigned	Unassigned	Unassigned	Unassigned	3	0	0	0	0	0	0	3	0	0	0	2	0	1	0	2	0	7	0	0	0	2	1	1	3	4	4	6	2	0	1	0	0	0	4	2	5	2	0	1	0	20
0e8e240a922d6c85d818bd823fed4751_rep;size=190;	k__Bacteria	p__Proteobacteria	c__Gammaproteobacteria	o__Betaproteobacteriales	f__Burkholderiaceae	g__Limnobacter	s__uncultured bacterium	0	0	0	0	0	0	0	0	0	0	0	0	0	0	0	0	0	0	0	0	0	0	0	0	0	0	0	0	0	0	0	0	0	0	0	0	0	0	0	0	0	0
ec768a90a1bd570f50a10609178ecf98_rep;size=190;	Unassigned	Unassigned	Unassigned	Unassigned	Unassigned	Unassigned	Unassigned	0	0	0	3	0	4	0	0	0	0	54	0	0	0	10	0	0	0	18	0	2	0	0	0	1	0	0	0	0	1	0	0	0	0	1	0	0	1	0	0	0	0
493eef1fcdbe7d4de0d4253ea31a6b82_rep;size=190;	Unassigned	Unassigned	Unassigned	Unassigned	Unassigned	Unassigned	Unassigned	4	0	0	1	0	0	0	1	0	0	0	0	0	2	0	0	0	0	1	0	0	0	0	0	2	0	0	2	2	0	0	0	2	0	0	0	0	0	0	9	0	0
905101afe6a987f895da576d843421f4_rep;size=189;	k__Bacteria	p__Proteobacteria	c__Alphaproteobacteria	o__Rhizobiales	f__Devosiaceae	g__Devosia	g__Devosia	2	3	0	0	0	0	2	0	1	0	0	0	0	2	1	0	19	0	0	0	0	1	0	0	0	1	0	3	0	0	3	4	0	1	0	0	0	1	17	0	0	0
6763bfa3942b84313506051264073f66_rep;size=189;	k__Bacteria	p__Cyanobacteria	c__Oxyphotobacteria	o__Chloroplast	o__Chloroplast	o__Chloroplast	o__Chloroplast	0	0	0	0	8	0	0	0	0	0	0	0	0	0	4	0	0	22	0	0	0	0	6	0	0	0	0	0	9	0	0	0	8	0	3	0	0	0	0	0	0	0
afbab7bbf3bfa198a36088fe89fdba5b_rep;size=189;	k__Bacteria	p__Actinobacteria	c__Actinobacteria	o__Micrococcales	f__Bogoriellaceae	Ambiguous_taxa	Ambiguous_taxa	0	0	0	0	0	0	0	0	0	1	0	0	0	0	0	0	0	0	0	0	0	0	0	1	0	0	0	0	0	0	3	0	0	0	0	13	0	0	24	0	2	0
2c6d68b0f2c51c62364ead672ac5d3f7_rep;size=189;	Unassigned	Unassigned	Unassigned	Unassigned	Unassigned	Unassigned	Unassigned	0	0	0	1	0	0	22	0	0	0	0	0	0	0	0	0	0	0	0	0	0	0	0	0	0	0	0	0	0	0	0	0	1	12	0	28	0	0	1	1	0	0
91983a3aff72c615ace3cd56ca72e2bc_rep;size=189;	k__Bacteria	p__Proteobacteria	c__Alphaproteobacteria	o__Rhodospirillales	f__Magnetospirillaceae	f__Magnetospirillaceae	f__Magnetospirillaceae	0	0	0	0	0	0	0	0	0	0	0	0	0	0	0	0	0	0	0	1	0	0	0	0	0	0	0	0	0	0	0	0	0	0	0	0	0	0	0	0	0	0
699daa673907fc9b0a58528cc648cb5d_rep;size=189;	Unassigned	Unassigned	Unassigned	Unassigned	Unassigned	Unassigned	Unassigned	0	0	0	0	0	3	0	0	0	0	1	0	0	0	1	0	0	0	1	1	3	1	0	0	1	0	0	0	0	1	0	1	0	0	0	1	1	0	0	0	0	0
417e7b769bb890c9ee000d464c56a005_rep;size=189;	Unassigned	Unassigned	Unassigned	Unassigned	Unassigned	Unassigned	Unassigned	10	0	2	0	0	0	0	0	0	0	0	1	0	0	0	1	0	0	0	0	0	1	0	0	2	1	1	4	1	0	0	0	0	0	3	1	10	0	0	1	4	4
97c3ce28aa7575b8d7c95788ea495800_rep;size=188;	Unassigned	Unassigned	Unassigned	Unassigned	Unassigned	Unassigned	Unassigned	0	19	0	0	0	0	0	0	0	0	0	0	0	0	0	0	0	0	0	20	0	0	0	0	0	0	0	0	0	1	0	0	0	1	0	0	0	0	0	0	0	0
e64afb2ca7d2f51d117d7f8cb6fe5e7c_rep;size=188;	k__Bacteria	p__Proteobacteria	c__Alphaproteobacteria	o__Rhizobiales	f__Rhizobiaceae	g__Allorhizobium-Neorhizobium-Pararhizobium-Rhizobium	g__Allorhizobium-Neorhizobium-Pararhizobium-Rhizobium	2	2	0	3	0	0	0	0	0	0	0	0	0	0	0	0	10	4	0	0	0	4	2	2	3	1	0	0	2	0	1	0	0	0	1	0	0	0	13	0	0	0
35dc52cb3ae2f5749ba64e8caad461cd_rep;size=188;	Unassigned	Unassigned	Unassigned	Unassigned	Unassigned	Unassigned	Unassigned	0	1	1	0	0	0	2	0	0	0	0	0	3	0	0	2	8	2	0	0	0	5	0	2	3	0	5	2	6	0	1	3	0	0	1	9	3	0	1	4	2	0
a2c5c9bbc878318ea62d456ec59c72fd_rep;size=188;	k__Bacteria	p__Bacteroidetes	c__Bacteroidia	o__Sphingobacteriales	f__Sphingobacteriaceae	g__Pedobacter	g__Pedobacter	0	27	1	0	1	0	0	4	0	0	1	3	0	0	0	0	0	5	0	3	2	7	2	3	0	0	2	0	0	0	0	0	1	0	0	5	0	0	2	0	0	2
33e64e539e30417b4454c58219fb86fe_rep;size=188;	k__Bacteria	p__Proteobacteria	c__Alphaproteobacteria	o__Sphingomonadales	f__Sphingomonadaceae	g__Sphingomonas	g__Sphingomonas	8	0	0	0	0	2	0	0	0	0	0	0	0	0	0	0	0	0	2	0	1	0	0	0	1	0	0	4	0	0	2	0	4	0	0	2	5	0	0	0	0	1
77105c21cbd41fa5104d2a2cccf7c402_rep;size=188;	Unassigned	Unassigned	Unassigned	Unassigned	Unassigned	Unassigned	Unassigned	0	0	0	0	0	0	0	0	0	0	0	0	0	0	0	0	0	0	0	0	0	0	0	0	0	0	0	0	0	0	0	0	0	0	0	0	0	0	0	0	0	0
7cbfeeacd162d8aa49de9134a0034759_rep;size=188;	k__Bacteria	p__Actinobacteria	c__Actinobacteria	o__Corynebacteriales	f__Nocardiaceae	g__Rhodococcus	g__Rhodococcus	2	0	0	0	0	0	0	0	0	0	0	1	0	0	0	0	1	0	0	0	0	0	2	0	0	1	0	0	1	12	11	0	2	17	0	2	0	0	115	0	1	0
b034dd180c0536b3e7f930632bb1dc1b_rep;size=187;	k__Bacteria	p__Proteobacteria	c__Alphaproteobacteria	o__Rhizobiales	f__Rhizobiaceae	g__Allorhizobium-Neorhizobium-Pararhizobium-Rhizobium	Ambiguous_taxa	0	0	0	0	0	0	0	0	0	0	0	0	0	0	3	0	0	0	0	17	0	0	2	1	1	0	0	0	0	0	0	2	0	1	0	0	0	0	0	0	0	0
71dc77ddbbc4dad5e41e6cf3dfbdd1fd_rep;size=187;	k__Bacteria	p__Proteobacteria	c__Deltaproteobacteria	o__Myxococcales	f__P3OB-42	g__uncultured bacterium	s__uncultured bacterium	1	0	0	3	0	0	0	0	2	1	3	0	0	0	0	0	1	0	0	0	0	0	5	0	0	0	0	0	0	3	0	0	3	0	0	1	0	0	1	0	1	0
11205a6ea222e22b70bfc7590cc750ef_rep;size=187;	k__Bacteria	p__Proteobacteria	c__Alphaproteobacteria	o__Caulobacterales	f__Caulobacteraceae	g__Brevundimonas	g__Brevundimonas	0	14	0	0	0	0	0	0	3	0	2	0	0	0	0	0	1	0	0	1	0	0	0	2	1	0	0	0	6	0	0	1	0	0	0	2	0	0	1	0	0	0
962e8fbaeb83df28abfc138d0423925e_rep;size=187;	k__Bacteria	p__Proteobacteria	c__Alphaproteobacteria	o__Sphingomonadales	f__Sphingomonadaceae	g__Sphingomonas	g__Sphingomonas	1	0	0	1	0	7	0	0	4	3	15	0	0	0	0	1	0	0	22	0	19	0	0	0	3	0	0	1	0	0	0	0	4	0	0	2	0	0	0	1	0	0
631cd17863ca707c2bdb932da90b18d6_rep;size=186;	k__Bacteria	p__Proteobacteria	c__Alphaproteobacteria	o__Rhodobacterales	f__Rhodobacteraceae	g__Paracoccus	g__Paracoccus	0	0	0	0	0	0	5	0	0	0	0	0	0	3	2	35	0	0	0	1	0	0	0	0	0	0	0	0	0	0	0	0	0	3	0	1	0	0	0	0	0	0
f4aaaef7cceb4c4dcd8e3c6c6551442a_rep;size=186;	Unassigned	Unassigned	Unassigned	Unassigned	Unassigned	Unassigned	Unassigned	2	0	0	0	0	0	0	0	3	5	0	0	0	18	0	1	0	2	0	0	0	0	0	0	0	0	0	3	0	0	0	0	26	0	0	0	2	0	0	1	0	3
74baac537f530c27ca9add72f80c3bd2_rep;size=186;	Unassigned	Unassigned	Unassigned	Unassigned	Unassigned	Unassigned	Unassigned	0	0	0	1	0	45	0	0	0	0	15	0	0	0	8	0	1	0	5	1	5	0	0	0	0	0	0	0	0	0	0	0	1	1	0	0	0	0	0	0	0	0
759cd22656f92b00364ffdafef01b5c6_rep;size=186;	k__Bacteria	p__Actinobacteria	c__Actinobacteria	o__Propionibacteriales	f__Propionibacteriaceae	g__Friedmanniella	g__Friedmanniella	0	0	1	1	4	0	1	2	0	0	0	3	0	14	0	4	0	11	0	0	0	0	3	0	0	0	0	1	2	0	0	0	0	0	1	6	0	2	0	1	0	1
1222611d8e49ad62ee74923d82f9ea83_rep;size=186;	Unassigned	Unassigned	Unassigned	Unassigned	Unassigned	Unassigned	Unassigned	0	0	6	3	0	0	1	15	0	0	0	4	0	0	0	0	0	0	0	0	0	8	1	1	1	1	16	4	1	0	0	1	0	0	2	1	1	0	0	0	5	14
bb848aca0a4ed7dcabcfcbd0c1d59e79_rep;size=186;	k__Bacteria	p__Actinobacteria	c__Actinobacteria	o__Micrococcales	f__Microbacteriaceae	f__Microbacteriaceae	f__Microbacteriaceae	0	0	0	0	0	2	5	2	0	0	0	1	0	3	1	0	0	7	0	0	0	0	3	0	0	2	1	1	5	0	0	0	0	3	3	1	0	5	0	2	0	0
eaf321922855f1d242562186b1d9ef6a_rep;size=186;	Unassigned	Unassigned	Unassigned	Unassigned	Unassigned	Unassigned	Unassigned	0	1	0	0	0	9	0	0	0	0	0	0	0	0	0	1	4	0	2	0	17	0	0	0	0	0	0	3	0	1	1	0	1	0	0	5	1	0	0	0	0	0
79a30e9a49bb6d40a71d9fc2302cdd35_rep;size=185;	Unassigned	Unassigned	Unassigned	Unassigned	Unassigned	Unassigned	Unassigned	3	0	0	0	0	0	0	0	0	2	0	0	0	0	0	0	0	0	0	0	0	0	0	0	10	0	0	1	0	0	0	51	2	0	0	0	3	0	0	0	0	0
40cb61e14cde8861fdbf180e5448bedd_rep;size=185;	k__Bacteria	p__Actinobacteria	c__Actinobacteria	o__Micrococcales	f__Micrococcaceae	g__Kocuria	g__Kocuria	6	0	0	0	1	0	0	1	0	0	0	1	0	7	0	2	0	5	0	0	2	0	1	0	4	2	0	0	0	0	1	0	4	0	1	0	1	5	2	2	0	0
59ae115605f8b3733f76a9f3e3242858_rep;size=185;	Unassigned	Unassigned	Unassigned	Unassigned	Unassigned	Unassigned	Unassigned	4	0	0	0	0	0	0	2	0	0	0	0	0	1	0	11	0	1	0	0	0	0	0	0	1	0	0	2	6	0	8	0	1	0	1	1	0	0	0	1	3	2
d411a7fdde424cc7bd8cc3f13362fcd2_rep;size=185;	k__Bacteria	p__Actinobacteria	c__Actinobacteria	o__Micrococcales	f__Microbacteriaceae	g__Rathayibacter	g__Rathayibacter	0	1	0	9	0	0	0	1	0	0	0	1	0	2	0	5	0	1	0	0	0	0	6	0	0	2	1	0	1	0	0	0	0	0	4	8	0	1	0	1	6	0
f3c811ac7d12078a0237be4201e7a775_rep;size=184;	k__Bacteria	p__Actinobacteria	c__Actinobacteria	o__Corynebacteriales	f__Mycobacteriaceae	g__Mycobacterium	g__Mycobacterium	0	0	0	0	0	0	3	0	0	0	0	0	0	0	0	0	0	2	0	0	0	0	0	0	0	0	0	0	1	39	0	1	0	11	0	0	1	0	98	0	2	0
84765d98cd4076383d9940fcd7ba9c8a_rep;size=184;	Unassigned	Unassigned	Unassigned	Unassigned	Unassigned	Unassigned	Unassigned	10	0	0	1	0	1	1	1	0	0	0	0	6	0	0	2	9	0	0	0	1	2	0	3	1	0	0	1	9	0	0	2	1	0	2	5	2	0	1	0	1	0
d1317fc1b5d1c290cd93c5f188a6ba89_rep;size=184;	Unassigned	Unassigned	Unassigned	Unassigned	Unassigned	Unassigned	Unassigned	3	1	1	2	0	1	1	0	0	0	1	0	3	1	0	0	4	1	0	0	1	1	2	2	0	0	0	0	10	0	3	1	0	0	0	1	0	0	0	0	1	0
514b5f92961caab5ad93eb0a77ec2194_rep;size=184;	k__Bacteria	p__Actinobacteria	c__Actinobacteria	o__Micrococcales	f__Micrococcaceae	g__Kocuria	Ambiguous_taxa	4	0	0	1	0	0	0	4	0	1	0	0	0	0	0	3	0	0	0	0	0	0	1	0	2	1	0	5	0	0	0	0	2	0	1	1	2	0	0	2	2	1
8b3fac1171e243ea57601530d14447ea_rep;size=183;	k__Bacteria	p__Proteobacteria	c__Alphaproteobacteria	o__Sphingomonadales	f__Sphingomonadaceae	g__Sphingomonas	g__Sphingomonas	0	0	0	0	0	0	0	0	71	0	0	0	0	0	0	0	0	0	0	28	0	0	0	0	0	0	0	0	0	6	0	0	0	0	0	0	0	0	0	0	0	0
577f630c339ebc0ad5f12749b4055905_rep;size=183;	k__Bacteria	p__Firmicutes	c__Negativicutes	o__Selenomonadales	f__Veillonellaceae	g__Anaerospora	Ambiguous_taxa	0	0	0	0	0	0	0	0	1	0	0	0	0	0	0	0	0	0	0	127	0	0	0	0	0	0	0	0	0	10	0	0	0	16	0	0	0	0	0	0	0	0
028b46c6d437f7c146b2390cebd0f849_rep;size=183;	Unassigned	Unassigned	Unassigned	Unassigned	Unassigned	Unassigned	Unassigned	0	1	7	7	3	0	0	1	4	0	0	3	0	0	0	3	95	1	0	0	0	3	0	0	0	0	3	1	0	0	0	0	0	0	0	0	0	0	0	1	1	1
b5df5f4d6782c2bed9b8286350737db2_rep;size=183;	k__Bacteria	p__Proteobacteria	c__Gammaproteobacteria	o__Betaproteobacteriales	f__Burkholderiaceae	g__Massilia	s__uncultured bacterium	0	0	0	0	0	0	0	0	0	0	0	0	0	0	0	0	0	0	0	0	0	0	0	0	0	0	0	0	1	0	0	0	0	0	0	0	0	0	0	0	0	1
a7fb18282bd7e23ede23877c0a4c7ef9_rep;size=183;	k__Bacteria	p__Proteobacteria	c__Alphaproteobacteria	o__Rhizobiales	f__Rhizobiaceae	f__Rhizobiaceae	f__Rhizobiaceae	0	1	0	0	0	1	1	0	0	0	3	0	0	0	0	0	0	0	0	4	0	0	0	0	0	0	0	0	10	3	0	0	1	20	0	7	0	0	0	0	0	0
74657458426ef187c0acba4c70990a50_rep;size=183;	Unassigned	Unassigned	Unassigned	Unassigned	Unassigned	Unassigned	Unassigned	0	44	0	0	0	0	0	0	0	0	0	0	0	0	0	0	2	0	0	3	2	0	0	0	0	0	0	0	6	0	0	2	0	0	0	1	0	0	1	0	0	0
a76db4b7265d004474e6de24f2353958_rep;size=183;	k__Bacteria	p__Proteobacteria	c__Alphaproteobacteria	o__Rhodobacterales	f__Rhodobacteraceae	g__Paracoccus	g__Paracoccus	2	0	0	2	0	0	0	0	0	0	0	0	0	0	0	1	0	0	0	0	0	0	0	0	0	0	1	1	19	0	0	0	0	0	0	16	2	0	0	1	0	0
554a327b7c97d8a1d642d47ab4dc861a_rep;size=182;	Unassigned	Unassigned	Unassigned	Unassigned	Unassigned	Unassigned	Unassigned	5	0	1	0	0	0	0	0	23	2	0	0	0	0	0	0	0	0	2	0	0	0	0	0	25	0	0	0	0	24	0	19	0	0	0	0	0	0	2	0	0	0
764195cf1288452668370e0335de5ceb_rep;size=182;	k__Bacteria	p__Proteobacteria	c__Alphaproteobacteria	o__Caulobacterales	f__Caulobacteraceae	g__Brevundimonas	g__Brevundimonas	1	0	0	4	0	5	1	0	2	0	3	0	0	0	7	0	0	0	13	0	1	0	0	0	0	0	0	0	6	0	0	0	3	0	0	1	0	0	0	0	0	0
bb64ca0eb3451053ac7b62176a6dbbb3_rep;size=182;	k__Bacteria	p__Actinobacteria	c__Actinobacteria	o__Micrococcales	f__Beutenbergiaceae	g__Miniimonas	Ambiguous_taxa	3	0	2	0	0	2	1	2	0	0	0	11	32	0	0	0	0	0	0	0	0	0	0	0	0	1	1	1	3	10	16	0	3	4	1	0	1	0	2	0	8	2
06f8a608cf738c672db00bbd94d4c3e8_rep;size=182;	Unassigned	Unassigned	Unassigned	Unassigned	Unassigned	Unassigned	Unassigned	2	0	0	2	0	4	0	3	0	5	9	0	0	0	0	2	0	0	1	0	0	1	6	0	3	1	0	0	1	0	0	0	1	0	0	4	0	2	0	2	2	1
5de4aceaef461d3956ac69bdaf049ebb_rep;size=182;	Unassigned	Unassigned	Unassigned	Unassigned	Unassigned	Unassigned	Unassigned	0	0	0	0	0	0	0	1	0	0	0	1	0	0	0	2	0	2	0	0	0	3	0	0	1	7	3	7	1	0	0	0	1	0	9	0	7	1	1	1	0	10
c699bb36aa2088f821e631eabd5d5f6d_rep;size=182;	Unassigned	Unassigned	Unassigned	Unassigned	Unassigned	Unassigned	Unassigned	2	0	0	2	0	0	0	0	0	0	1	0	0	0	0	2	0	1	0	0	3	0	0	0	1	0	1	1	0	0	0	0	5	0	4	1	3	0	0	2	0	1
cb259b1a4a1e7f137fcd1b574fa48e27_rep;size=182;	k__Bacteria	p__Proteobacteria	c__Alphaproteobacteria	o__Caulobacterales	f__Caulobacteraceae	g__Brevundimonas	Ambiguous_taxa	1	2	0	1	0	3	0	0	1	0	0	0	2	0	2	1	23	0	0	1	1	0	0	1	0	1	0	0	4	0	5	3	0	1	0	2	0	0	0	0	0	1
06d6cadcaf57dd0dcc7839b99a16cdbd_rep;size=182;	Unassigned	Unassigned	Unassigned	Unassigned	Unassigned	Unassigned	Unassigned	0	0	21	0	0	0	0	12	0	0	0	1	0	0	0	0	0	0	0	0	0	37	0	0	0	0	71	0	0	0	0	0	0	0	0	2	0	0	0	0	0	25
ef24532fbc1b16fb316e684096472595_rep;size=182;	k__Bacteria	p__Proteobacteria	c__Alphaproteobacteria	o__Sphingomonadales	f__Sphingomonadaceae	g__Sphingomonas	g__Sphingomonas	0	0	0	0	0	0	0	0	0	0	26	0	0	0	0	0	0	0	4	0	7	0	0	0	0	0	0	3	0	0	0	0	3	0	0	0	1	0	0	0	0	0
652a4045e40998baa35c74cf2885d827_rep;size=182;	Unassigned	Unassigned	Unassigned	Unassigned	Unassigned	Unassigned	Unassigned	1	0	1	0	0	2	1	2	0	0	0	0	0	0	0	0	1	3	0	0	0	1	1	1	3	0	3	4	2	0	2	0	1	0	0	6	3	0	0	3	1	7
364f42224be6183e4b416b9dd7b7113f_rep;size=181;	k__Bacteria	p__Proteobacteria	c__Alphaproteobacteria	o__Sphingomonadales	f__Sphingomonadaceae	g__Sphingomonas	Ambiguous_taxa	0	0	0	0	0	12	0	0	82	0	0	0	0	0	0	0	1	0	2	2	2	0	0	0	0	0	0	0	0	0	0	0	0	0	0	0	0	0	0	0	0	0
648d96c691a2c500d44802ee7f003519_rep;size=181;	k__Bacteria	p__Proteobacteria	c__Alphaproteobacteria	o__Sphingomonadales	f__Sphingomonadaceae	g__Sphingomonas	g__Sphingomonas	13	0	0	1	9	0	0	1	0	0	0	0	0	2	0	0	1	1	0	0	0	1	0	0	0	3	4	0	0	4	3	0	5	0	1	3	3	0	2	5	0	3
1a296024ab12d67c596bac7cf012c1da_rep;size=181;	Unassigned	Unassigned	Unassigned	Unassigned	Unassigned	Unassigned	Unassigned	4	0	0	0	0	0	1	1	0	0	0	3	0	3	1	0	0	12	1	0	0	1	4	2	0	7	2	0	0	0	5	0	0	0	8	0	0	4	0	2	5	2
c872d7a938b716e32a376903bbfaeb89_rep;size=181;	Unassigned	Unassigned	Unassigned	Unassigned	Unassigned	Unassigned	Unassigned	0	0	0	0	0	4	0	0	8	98	1	0	0	0	0	0	0	0	4	3	9	0	2	0	0	0	0	0	0	0	0	2	0	0	0	0	0	0	0	0	0	0
67a9220ef6dd848d4556f0cb24f164be_rep;size=180;	k__Bacteria	p__Proteobacteria	c__Alphaproteobacteria	o__Rhizobiales	f__Beijerinckiaceae	g__Methylobacterium	Ambiguous_taxa	0	0	0	0	0	0	0	0	0	68	1	0	0	0	0	0	0	0	0	0	0	0	0	0	0	0	0	0	0	0	0	0	0	0	0	0	0	0	0	0	0	0
c5cfb75b056fd724df929473bbcf0052_rep;size=180;	Unassigned	Unassigned	Unassigned	Unassigned	Unassigned	Unassigned	Unassigned	1	0	23	2	0	0	0	11	0	0	0	13	1	0	0	0	0	0	0	0	0	9	0	0	0	0	29	0	1	0	1	0	0	0	1	4	0	4	0	0	2	15
a833dcb05731ec09264f6886cf246e39_rep;size=180;	k__Bacteria	p__Actinobacteria	c__Actinobacteria	o__Micrococcales	f__Micrococcaceae	g__Micrococcus	g__Micrococcus	0	0	0	0	0	0	0	0	0	0	0	1	0	0	0	0	0	2	0	0	0	1	0	0	0	0	2	1	0	1	0	0	0	1	0	1	0	0	0	0	0	0
5df89c50d0a0bf1e43adc156ad4170c9_rep;size=180;	Unassigned	Unassigned	Unassigned	Unassigned	Unassigned	Unassigned	Unassigned	10	0	0	2	0	0	0	0	0	0	0	0	3	0	0	3	4	0	0	0	1	0	0	1	0	1	0	2	7	0	1	0	1	1	0	0	1	0	0	1	0	0
4726c4ccfc1d24b7dd946b8f6d1064b9_rep;size=180;	Unassigned	Unassigned	Unassigned	Unassigned	Unassigned	Unassigned	Unassigned	0	51	0	0	0	0	0	0	0	0	0	0	0	0	0	0	0	0	0	0	0	0	0	0	0	0	0	0	9	0	0	0	0	0	0	0	0	0	1	0	0	0
df39133eb4210fa456e52ad1d8b58dca_rep;size=180;	Unassigned	Unassigned	Unassigned	Unassigned	Unassigned	Unassigned	Unassigned	0	0	0	3	0	4	0	0	0	0	0	0	12	0	0	0	0	0	0	0	0	0	10	23	0	0	0	2	0	0	11	0	2	0	0	0	0	0	0	0	4	0
d018282c04b374c030096a2d966b0807_rep;size=179;	Unassigned	Unassigned	Unassigned	Unassigned	Unassigned	Unassigned	Unassigned	0	1	0	2	0	0	0	0	0	0	0	0	0	0	0	0	0	2	0	0	0	0	1	0	0	0	0	0	12	0	2	0	0	1	0	17	3	0	0	1	0	0
9a44988f7e1f07e3424a8015f0d94292_rep;size=179;	Unassigned	Unassigned	Unassigned	Unassigned	Unassigned	Unassigned	Unassigned	0	0	3	0	1	0	0	5	0	0	0	0	0	0	0	0	0	3	0	0	0	8	0	0	0	1	2	3	1	0	3	0	0	0	12	1	2	0	0	0	0	13
d7f2ece4cebabe7c12888617343e4a23_rep;size=179;	k__Bacteria	p__Actinobacteria	c__Actinobacteria	o__Micrococcales	f__uncultured	g__uncultured bacterium	s__uncultured bacterium	19	0	0	0	0	0	0	0	0	0	0	0	0	3	0	10	0	2	0	0	0	0	7	0	1	7	0	1	0	0	6	0	1	1	3	2	1	0	0	1	4	1
9b7219cbd51fb4e07e139bcd258b07b3_rep;size=178;	k__Bacteria	p__Proteobacteria	c__Gammaproteobacteria	o__Betaproteobacteriales	f__Burkholderiaceae	f__Burkholderiaceae	f__Burkholderiaceae	0	0	0	0	0	0	0	0	0	0	0	0	0	0	0	0	0	0	0	0	0	1	0	0	0	0	0	0	0	0	0	0	0	0	0	0	0	0	0	0	0	0
ed600dcd9c3d028a421a49706847966e_rep;size=178;	Unassigned	Unassigned	Unassigned	Unassigned	Unassigned	Unassigned	Unassigned	0	3	0	0	0	0	0	0	1	0	10	0	0	0	0	1	0	0	0	0	2	0	0	0	2	0	0	0	5	0	0	1	0	0	0	0	1	0	0	0	1	0
558ffd44ebc4bf0b374848e32a4ff406_rep;size=178;	k__Bacteria	p__Proteobacteria	c__Alphaproteobacteria	o__Acetobacterales	f__Acetobacteraceae	g__Roseomonas	Ambiguous_taxa	0	0	1	0	2	0	12	0	0	0	0	0	0	2	0	6	0	3	0	0	0	0	2	0	0	0	0	8	0	0	0	0	0	0	0	0	1	0	6	4	0	0
0be0d4b3504c22eb801c6b1c89144679_rep;size=178;	k__Bacteria	p__Bacteroidetes	c__Bacteroidia	o__Cytophagales	f__Hymenobacteraceae	g__Hymenobacter	s__uncultured bacterium	0	0	0	0	0	0	0	0	10	0	1	0	0	0	0	0	0	0	0	0	0	0	0	0	0	0	1	0	0	0	0	0	1	0	0	0	0	2	1	3	0	0
102d29a4439bd6fa89f8628622f78467_rep;size=178;	k__Bacteria	p__Firmicutes	c__Negativicutes	o__Selenomonadales	f__Veillonellaceae	g__Pelosinus	s__uncultured bacterium	1	0	0	2	1	0	0	0	0	0	0	2	0	0	0	0	0	0	1	138	0	0	0	0	0	1	0	1	0	0	0	0	1	10	0	0	0	0	0	0	0	0
a15f17c81d94035949461088484dadb8_rep;size=178;	k__Bacteria	p__Proteobacteria	c__Alphaproteobacteria	o__Rhodobacterales	f__Rhodobacteraceae	g__Paracoccus	Ambiguous_taxa	22	0	0	2	0	0	0	1	0	0	0	0	0	0	0	1	0	1	0	0	0	0	0	0	1	0	0	2	3	0	4	0	1	0	2	2	4	0	0	1	0	0
e486ba26fa39a86ce5e9ab2ddbf3674a_rep;size=178;	Unassigned	Unassigned	Unassigned	Unassigned	Unassigned	Unassigned	Unassigned	0	0	0	3	0	2	0	0	3	2	59	0	0	0	5	0	0	0	7	0	3	0	0	0	2	0	0	0	1	1	0	0	1	0	0	0	0	0	0	0	0	0
fd84507e61cfdf356d35e7cc78cc6ed1_rep;size=178;	k__Bacteria	p__Actinobacteria	c__Actinobacteria	o__Micrococcales	o__Micrococcales	o__Micrococcales	o__Micrococcales	19	0	0	0	0	0	0	3	0	0	0	0	13	1	0	0	1	2	0	0	0	5	0	0	1	0	3	2	0	0	3	0	1	0	1	0	2	0	1	0	1	12
13d1c58081f5d3c2601b1615598d7799_rep;size=178;	Unassigned	Unassigned	Unassigned	Unassigned	Unassigned	Unassigned	Unassigned	0	0	0	0	1	1	0	2	0	0	1	0	0	1	0	2	1	0	0	0	2	3	3	0	0	0	1	2	6	0	5	0	0	0	0	1	1	1	0	2	0	0
f883cd933b540b4c1dd9f37d1617bf6f_rep;size=177;	k__Bacteria	p__Bacteroidetes	c__Bacteroidia	o__Cytophagales	f__Cyclobacteriaceae	g__Mongoliicoccus	Ambiguous_taxa	0	0	0	0	0	0	177	0	0	0	0	0	0	0	0	0	0	0	0	0	0	0	0	0	0	0	0	0	0	0	0	0	0	0	0	0	0	0	0	0	0	0
01d150922a292e6337ac81d037a5820d_rep;size=177;	Unassigned	Unassigned	Unassigned	Unassigned	Unassigned	Unassigned	Unassigned	6	0	0	0	0	0	0	0	0	0	0	0	0	3	0	5	0	1	3	0	0	0	0	0	0	0	1	4	0	0	0	0	1	0	0	4	4	0	0	12	0	3
223b97ae91345f6e017e13e1dee4ae81_rep;size=177;	k__Bacteria	p__Actinobacteria	c__Actinobacteria	o__Micrococcales	f__Micrococcaceae	g__Kocuria	s__Kocuria sp. HL94	10	0	0	0	0	0	0	1	0	0	0	2	1	5	0	8	3	5	0	0	1	0	5	1	4	3	0	5	2	0	1	0	2	2	0	0	3	1	1	5	4	0
b9724e30264bec686c2eda17d575c497_rep;size=177;	k__Bacteria	p__Proteobacteria	c__Alphaproteobacteria	o__Rhizobiales	f__Beijerinckiaceae	g__uncultured	g__uncultured	0	0	0	0	0	0	0	0	0	0	0	0	0	0	0	0	0	0	0	0	0	0	0	0	0	0	0	0	0	0	0	0	0	0	0	0	0	0	0	0	0	0
9e52805c6e8517cc32409f4281e50044_rep;size=177;	Unassigned	Unassigned	Unassigned	Unassigned	Unassigned	Unassigned	Unassigned	11	0	0	0	1	0	0	2	0	0	0	6	0	4	0	0	0	6	0	0	0	4	0	0	0	3	2	0	2	0	3	0	1	2	5	0	1	2	2	2	0	1
742ec2ea1728d23ba79318043799aa1b_rep;size=177;	Unassigned	Unassigned	Unassigned	Unassigned	Unassigned	Unassigned	Unassigned	47	0	0	0	0	0	2	0	0	0	0	0	0	2	0	0	0	0	0	0	0	1	0	3	2	1	1	6	1	0	1	0	0	0	1	2	1	0	1	0	5	2
c69df45c10d60a248ecad636294aa51c_rep;size=177;	Unassigned	Unassigned	Unassigned	Unassigned	Unassigned	Unassigned	Unassigned	8	0	0	0	0	0	0	0	0	0	0	0	0	0	0	0	0	0	0	0	2	0	20	0	0	0	0	1	0	0	0	0	89	0	0	1	2	0	0	0	1	0
0636e75e226404cf8007c2d39f3d0722_rep;size=176;	Unassigned	Unassigned	Unassigned	Unassigned	Unassigned	Unassigned	Unassigned	3	0	0	1	0	5	0	0	4	0	0	0	0	0	0	0	7	0	11	0	16	0	0	0	0	0	0	2	0	1	0	0	3	0	0	2	3	0	0	2	0	0
b22daf28e6740c38f2449a2b3859914e_rep;size=176;	k__Bacteria	p__Actinobacteria	c__Actinobacteria	o__Micrococcales	f__Cellulomonadaceae	Ambiguous_taxa	Ambiguous_taxa	8	0	0	1	0	0	0	0	0	0	0	0	0	1	0	0	1	0	0	0	0	0	5	0	1	0	0	0	2	0	0	0	3	0	2	2	3	0	0	1	0	0
446f8c61878d7845fb7c32f84323765f_rep;size=176;	Unassigned	Unassigned	Unassigned	Unassigned	Unassigned	Unassigned	Unassigned	15	0	0	0	0	0	0	1	0	0	0	0	3	1	0	1	1	0	0	0	0	0	4	3	0	1	0	1	0	0	5	0	2	0	4	4	0	1	0	3	1	3
ab5debc717d6887cc6e6254d8d5b859c_rep;size=176;	Unassigned	Unassigned	Unassigned	Unassigned	Unassigned	Unassigned	Unassigned	3	0	1	0	0	1	1	5	0	0	0	0	0	0	0	1	0	1	0	0	0	1	1	0	1	1	0	1	5	0	22	0	0	0	1	7	2	0	1	5	2	2
5e37bc937e93932df2fc004907a946d5_rep;size=175;	k__Bacteria	p__Proteobacteria	c__Gammaproteobacteria	o__Pseudomonadales	f__Pseudomonadaceae	g__Pseudomonas	s__Pseudomonas pseudoalcaligenes	0	0	2	57	0	0	0	0	0	0	0	3	0	0	0	0	40	2	0	0	0	0	1	0	1	1	0	0	0	0	0	0	0	2	0	0	1	0	15	0	0	0
314abce18360075dbdd08eef956c00bf_rep;size=175;	k__Bacteria	p__Proteobacteria	c__Alphaproteobacteria	o__Sphingomonadales	f__Sphingomonadaceae	g__Sphingomonas	g__Sphingomonas	0	0	0	1	0	4	0	1	0	45	0	0	0	0	28	0	0	0	1	0	0	0	0	0	0	0	0	0	0	0	0	0	0	0	0	0	0	0	0	0	0	0
5fb2dd143e89854f40622470dbbe8745_rep;size=175;	Unassigned	Unassigned	Unassigned	Unassigned	Unassigned	Unassigned	Unassigned	0	0	0	0	0	0	3	1	1	1	0	0	0	1	0	1	0	1	0	0	0	0	0	0	10	0	2	1	0	0	0	0	3	0	0	0	0	0	0	1	0	0
ddb3bc7c91c8c1b6bc633838b3184a0f_rep;size=175;	k__Bacteria	p__Proteobacteria	c__Alphaproteobacteria	o__Sphingomonadales	f__Sphingomonadaceae	g__Novosphingobium	g__Novosphingobium	0	0	1	0	1	0	3	0	0	1	0	0	0	1	0	4	0	2	1	2	1	0	0	0	0	0	0	5	0	1	5	1	6	0	0	7	0	0	2	0	6	7
75a5fbc8c99f1e481ea89a0ade3f781c_rep;size=174;	k__Bacteria	p__Bacteroidetes	c__Bacteroidia	o__Cytophagales	f__Hymenobacteraceae	g__Hymenobacter	Ambiguous_taxa	0	0	1	0	5	0	2	0	0	0	1	1	0	1	0	11	0	3	0	0	0	0	1	0	0	0	0	2	0	0	0	0	1	0	0	1	0	6	0	16	0	1
a2f5b9f480ecb17bb3303cc470f4be19_rep;size=174;	k__Bacteria	p__Actinobacteria	c__Actinobacteria	o__Micrococcales	f__Micrococcaceae	g__Nesterenkonia	Ambiguous_taxa	0	0	0	0	0	0	111	0	0	0	0	1	0	0	5	0	0	0	0	0	0	0	0	0	0	0	0	0	0	4	0	0	0	19	0	0	0	0	0	0	3	0
780c053fccd95a812072eb6f59e52026_rep;size=174;	k__Bacteria	p__Proteobacteria	c__Gammaproteobacteria	o__Betaproteobacteriales	f__Burkholderiaceae	g__Duganella	g__Duganella	0	0	62	9	0	2	0	0	0	0	0	2	0	0	0	0	10	5	4	4	0	1	0	2	0	0	0	0	4	0	0	3	0	0	0	0	0	0	4	2	0	0
4686824eacf6b766b59e205b31e29b6b_rep;size=174;	k__Bacteria	p__Deinococcus-Thermus	c__Deinococci	o__Deinococcales	f__Deinococcaceae	g__Deinococcus	g__Deinococcus	1	0	0	0	0	0	0	0	0	0	0	0	0	0	0	1	0	0	0	0	0	0	0	0	2	0	0	1	0	0	0	0	0	0	0	0	2	0	0	0	0	0
ebed34c4304d25a7f59c6c911984cef8_rep;size=174;	k__Bacteria	p__Proteobacteria	c__Gammaproteobacteria	o__Xanthomonadales	f__Xanthomonadaceae	g__Stenotrophomonas	g__Stenotrophomonas	0	4	4	0	0	0	0	0	0	0	0	0	4	0	0	0	1	0	0	0	1	0	2	1	7	0	0	2	1	0	0	16	35	0	0	1	0	0	0	0	0	0
2e802a3b800e4df2b0e4f2cc446c918b_rep;size=174;	k__Bacteria	p__Proteobacteria	c__Gammaproteobacteria	o__Pseudomonadales	f__Pseudomonadaceae	g__Pseudomonas	Ambiguous_taxa	0	0	2	1	1	0	0	0	0	0	0	8	0	5	0	0	4	9	0	0	0	0	4	0	0	0	2	0	0	0	1	0	0	0	0	1	0	0	1	0	0	5
124c77d0ba686bd0f363c510015a07be_rep;size=174;	Unassigned	Unassigned	Unassigned	Unassigned	Unassigned	Unassigned	Unassigned	0	0	0	0	1	0	0	0	0	0	0	0	0	0	0	15	0	0	0	0	0	0	0	0	0	0	0	4	0	0	0	0	0	0	0	0	3	0	1	0	0	1
d5b2a089f2496356af0a1be86057de53_rep;size=174;	Unassigned	Unassigned	Unassigned	Unassigned	Unassigned	Unassigned	Unassigned	22	0	2	2	0	0	0	1	1	0	0	0	0	0	0	0	0	1	0	0	0	0	0	16	1	2	0	0	0	1	0	0	0	0	0	0	0	0	1	0	0	1
43d4efecbfa55c585333d8c9eb02ed8e_rep;size=173;	k__Bacteria	p__Proteobacteria	c__Alphaproteobacteria	o__Rhizobiales	f__Rhizobiaceae	f__Rhizobiaceae	f__Rhizobiaceae	0	0	0	0	0	0	0	0	0	0	0	0	0	0	0	0	0	0	0	0	0	2	0	0	5	0	0	0	0	0	0	0	0	0	0	0	0	0	0	0	0	0
9b4d0f98f99b3e9fc32b0a61232dfd35_rep;size=173;	k__Bacteria	p__Actinobacteria	c__Actinobacteria	o__Micrococcales	f__Micrococcaceae	f__Micrococcaceae	f__Micrococcaceae	18	0	1	0	0	0	0	1	0	0	0	1	4	1	0	1	2	1	0	0	0	1	1	4	1	2	7	4	0	0	1	1	1	0	2	1	1	1	0	0	2	2
7b93e933654f2305bf369685fd4e8c87_rep;size=173;	k__Bacteria	p__Proteobacteria	c__Gammaproteobacteria	o__Betaproteobacteriales	f__Burkholderiaceae	g__Noviherbaspirillum	g__Noviherbaspirillum	1	0	1	0	1	0	2	1	0	0	1	0	0	0	0	2	0	0	0	0	0	0	0	0	1	0	1	3	0	0	0	0	1	0	0	19	1	1	0	15	0	2
dd7122fdf6088bfbcd74eb39aa9553f8_rep;size=173;	k__Bacteria	p__Actinobacteria	c__Actinobacteria	o__Micrococcales	f__Micrococcaceae	f__Micrococcaceae	f__Micrococcaceae	0	0	0	0	0	0	18	1	0	0	0	1	0	5	0	11	0	0	0	0	0	0	0	0	4	1	0	2	1	0	0	0	0	0	3	3	0	0	0	1	1	0
47a756fa4cb8299a3dd1661a96faf134_rep;size=173;	k__Bacteria	p__Actinobacteria	c__Actinobacteria	o__Micrococcales	f__Micrococcaceae	f__Micrococcaceae	f__Micrococcaceae	0	0	0	0	0	1	2	2	0	0	0	34	0	3	0	2	0	5	0	0	0	0	1	0	0	0	0	2	0	0	35	0	0	0	4	1	3	1	0	0	3	1
fcb98b97ca7d9895392ddc0829db1f39_rep;size=173;	Unassigned	Unassigned	Unassigned	Unassigned	Unassigned	Unassigned	Unassigned	0	0	2	2	0	2	0	0	0	0	0	1	15	0	0	0	10	0	0	0	0	6	0	1	1	0	1	2	8	0	1	1	1	0	0	6	1	0	3	0	0	2
c960199b979d63ad5445c22ab7b20ed7_rep;size=173;	k__Bacteria	p__Proteobacteria	c__Alphaproteobacteria	o__Sphingomonadales	f__Sphingomonadaceae	g__Sphingomonas	g__Sphingomonas	0	1	0	6	0	7	0	0	4	0	0	0	0	0	0	0	6	1	11	0	16	0	0	0	2	0	0	1	1	0	0	0	6	0	0	0	2	0	0	0	0	0
6d3e5d85b2aa35d58347bb4b9b203e43_rep;size=172;	k__Bacteria	p__Proteobacteria	c__Gammaproteobacteria	o__Enterobacteriales	f__Enterobacteriaceae	g__Escherichia-Shigella	g__Escherichia-Shigella	0	0	0	0	0	0	0	0	0	0	0	0	0	0	0	0	0	0	0	0	0	0	0	0	0	0	0	0	0	0	0	0	0	0	0	0	0	0	0	0	0	0
ac6807c03dc6ed5ec1b3a134a9e08cc9_rep;size=172;	k__Bacteria	p__Proteobacteria	c__Gammaproteobacteria	o__Betaproteobacteriales	f__Burkholderiaceae	g__Massilia	g__Massilia	0	0	0	0	0	0	0	0	1	0	0	0	0	0	0	0	0	0	1	142	0	0	0	0	0	0	0	0	0	25	0	0	0	0	0	0	0	0	0	1	0	0
2e55e65a86c6141dbedcfb8653508fe8_rep;size=172;	k__Bacteria	p__Proteobacteria	c__Alphaproteobacteria	o__Sphingomonadales	f__Sphingomonadaceae	g__Sphingomonas	g__Sphingomonas	2	0	0	19	0	10	0	0	1	3	11	0	0	0	0	0	0	0	0	0	0	0	3	0	0	0	0	2	0	0	2	0	13	0	1	0	2	0	0	0	1	0
5e3fe7f482bda35200ee0ecadc911643_rep;size=172;	k__Bacteria	p__Proteobacteria	c__Alphaproteobacteria	o__Sphingomonadales	f__Sphingomonadaceae	g__Sphingomonas	g__Sphingomonas	0	0	0	0	0	0	0	0	0	58	0	0	0	0	11	0	0	0	4	0	0	0	0	0	0	0	0	0	0	0	0	0	0	0	0	0	0	0	0	0	0	0
1960e8acb0ba80f2783a12309282b596_rep;size=172;	k__Bacteria	p__Proteobacteria	c__Gammaproteobacteria	o__Betaproteobacteriales	f__Burkholderiaceae	g__Massilia	s__uncultured bacterium	0	0	0	1	0	1	0	0	0	0	0	0	0	0	0	2	0	0	0	0	0	0	1	0	0	0	0	3	0	0	0	2	3	0	0	0	5	0	0	3	0	0
8e6a273395c4de795e498053439f1d60_rep;size=171;	k__Bacteria	p__Proteobacteria	c__Alphaproteobacteria	o__Rhizobiales	f__Rhizobiaceae	f__Rhizobiaceae	f__Rhizobiaceae	1	0	0	0	0	0	0	0	0	0	0	0	0	0	0	0	0	0	0	0	0	0	0	0	2	0	0	0	56	0	20	7	7	3	0	0	0	0	0	0	1	0
52dbfa4384c7980b1bc5d5a3cdca4a29_rep;size=171;	Unassigned	Unassigned	Unassigned	Unassigned	Unassigned	Unassigned	Unassigned	2	0	0	8	0	11	0	0	0	0	0	0	12	0	0	0	5	0	0	0	0	0	0	13	0	0	0	0	0	0	0	0	1	1	0	0	0	0	0	0	0	0
900195974afdc1b684db4a0fe4479225_rep;size=171;	k__Bacteria	p__Proteobacteria	c__Gammaproteobacteria	o__Betaproteobacteriales	f__Burkholderiaceae	g__Massilia	s__uncultured bacterium	1	0	0	2	0	1	0	1	0	0	0	0	0	0	0	7	0	0	0	0	0	0	0	0	2	0	0	1	0	0	0	2	3	0	0	2	1	0	3	5	0	0
941e2d0e466eaae82f6eb29e655f3e60_rep;size=171;	Unassigned	Unassigned	Unassigned	Unassigned	Unassigned	Unassigned	Unassigned	1	0	0	0	0	0	0	0	1	0	0	0	0	0	0	0	0	0	4	0	1	0	8	0	0	0	0	0	0	0	0	0	87	0	0	0	1	0	0	0	1	0
f7a7ba641bd4cb737661f5ee18a3a89e_rep;size=170;	k__Bacteria	p__Firmicutes	c__Clostridia	o__Clostridiales	f__Gracilibacteraceae	g__Lutispora	s__uncultured bacterium	0	0	0	0	0	0	0	0	0	0	0	0	0	0	0	0	0	0	0	0	0	0	0	0	0	0	0	2	0	2	0	0	0	2	0	0	0	0	0	0	0	0
4c34ec5b7fb94a0b047c9503155535a8_rep;size=170;	Unassigned	Unassigned	Unassigned	Unassigned	Unassigned	Unassigned	Unassigned	7	0	0	0	0	1	0	0	0	0	0	0	8	0	0	0	4	0	0	0	1	0	0	3	1	1	0	0	11	0	3	2	0	0	0	3	0	0	1	0	0	0
aaaf5230d4dd5561e61eaa80dbf0a018_rep;size=170;	k__Bacteria	p__Proteobacteria	c__Gammaproteobacteria	o__Betaproteobacteriales	f__Burkholderiaceae	g__Acidovorax	g__Acidovorax	1	0	0	3	0	0	0	0	0	0	0	0	0	1	0	0	0	0	0	17	0	6	0	0	0	0	0	0	0	0	6	3	0	3	0	1	0	0	0	0	1	1
c3cbc6cb4aa81fbfb931168fb5ef6551_rep;size=170;	k__Bacteria	p__Proteobacteria	c__Alphaproteobacteria	o__Caulobacterales	f__Caulobacteraceae	g__Brevundimonas	g__Brevundimonas	1	0	0	0	0	0	0	0	0	0	0	0	0	0	2	0	15	0	0	0	2	0	1	0	0	0	0	0	5	0	1	0	0	0	0	0	0	0	0	0	0	0
e8b7bd70c50f4e6f9bc742d6d7e53ebe_rep;size=169;	k__Bacteria	p__Proteobacteria	c__Alphaproteobacteria	o__Rhizobiales	f__Beijerinckiaceae	g__1174-901-12	s__uncultured bacterium	0	0	0	0	0	0	0	0	47	0	0	0	0	0	19	0	0	0	1	0	0	0	0	0	0	0	0	1	0	3	0	0	0	4	0	0	0	0	0	0	0	0
7e3be9dbe775049c00d384445cdfe713_rep;size=169;	Unassigned	Unassigned	Unassigned	Unassigned	Unassigned	Unassigned	Unassigned	5	0	0	0	0	1	0	1	0	0	0	0	3	0	0	0	1	0	0	0	0	0	0	3	2	0	0	0	9	0	0	2	1	0	0	1	2	0	2	1	0	1
bc8cdd66aa7d8a997cdf6e8c0d3eb95c_rep;size=169;	k__Bacteria	p__Proteobacteria	c__Alphaproteobacteria	o__Rhizobiales	f__Xanthobacteraceae	g__Ancylobacter	Ambiguous_taxa	0	53	0	0	0	0	0	0	0	0	0	0	0	0	0	0	0	0	0	0	0	0	0	0	0	0	0	0	0	0	0	0	0	0	0	0	0	0	0	0	0	0
1dc0d795b07acefb675b542fad15b4ed_rep;size=169;	k__Bacteria	p__Proteobacteria	c__Alphaproteobacteria	o__Caulobacterales	f__Caulobacteraceae	g__Brevundimonas	g__Brevundimonas	0	9	0	0	0	3	0	0	0	0	0	0	0	0	0	0	43	0	0	0	5	1	1	0	0	0	0	0	3	0	1	0	0	0	0	0	0	0	0	0	0	1
71272f884df2b750a4ed31a0bdab3bf7_rep;size=169;	Unassigned	Unassigned	Unassigned	Unassigned	Unassigned	Unassigned	Unassigned	0	0	0	0	0	0	0	0	0	0	0	0	0	0	0	0	0	0	0	0	0	0	0	0	0	0	0	0	0	0	0	0	2	0	0	0	0	1	0	0	0	0
929b49f1734c594366612a9134621780_rep;size=169;	Unassigned	Unassigned	Unassigned	Unassigned	Unassigned	Unassigned	Unassigned	0	0	0	0	0	0	0	0	0	94	0	0	0	0	0	0	0	0	4	0	0	0	0	0	0	0	0	0	0	0	0	0	0	0	0	0	0	0	0	0	0	0
96b740b7e42c7372f4eabf8d863f080a_rep;size=169;	Unassigned	Unassigned	Unassigned	Unassigned	Unassigned	Unassigned	Unassigned	0	6	0	1	0	3	0	0	0	0	0	0	0	0	0	0	5	0	0	3	22	0	0	0	0	0	0	1	0	0	0	0	0	0	0	1	1	0	0	0	0	0
0fccd09c04cf65d1ea0c3b98bc269eb3_rep;size=169;	Unassigned	Unassigned	Unassigned	Unassigned	Unassigned	Unassigned	Unassigned	0	0	0	6	0	7	0	0	0	0	2	0	1	0	1	0	1	0	0	0	0	0	0	0	0	0	0	0	4	0	0	1	0	0	0	1	0	0	0	0	0	0
ac1fafb5f7ec2c460af7d3f85ab1cded_rep;size=168;	Unassigned	Unassigned	Unassigned	Unassigned	Unassigned	Unassigned	Unassigned	0	0	0	0	0	0	0	0	0	0	0	0	0	0	0	0	0	0	0	0	0	0	0	0	0	0	0	0	0	130	0	0	0	3	0	0	0	0	0	0	0	0
ed2fa8be462f9c21521ffde9f3ba4b76_rep;size=168;	k__Bacteria	p__Proteobacteria	c__Gammaproteobacteria	o__Betaproteobacteriales	f__Burkholderiaceae	g__Mitsuaria	g__Mitsuaria	0	0	0	0	0	0	0	0	0	0	0	0	0	0	2	0	2	0	0	8	0	0	0	0	0	0	0	0	9	2	0	0	1	0	0	0	0	0	0	0	0	0
d4e740bc5c2587cbbb188e8e30026611_rep;size=168;	k__Bacteria	p__Actinobacteria	c__Actinobacteria	o__Corynebacteriales	f__Corynebacteriaceae	g__Corynebacterium 1	s__uncultured bacterium	0	0	0	0	1	0	1	0	0	0	0	3	0	3	1	0	0	19	0	0	0	0	4	0	0	5	0	0	2	0	0	0	2	1	1	1	0	0	0	0	0	0
77fb9a7c3ffb60010dcb08d8c4978fc1_rep;size=168;	Unassigned	Unassigned	Unassigned	Unassigned	Unassigned	Unassigned	Unassigned	0	24	0	1	0	0	0	0	0	3	0	0	0	0	0	0	4	0	0	0	29	0	0	2	0	0	0	0	0	0	0	0	0	1	0	0	0	0	0	0	0	0
53f871443c744b4a4fbc15d839b8fcde_rep;size=168;	k__Bacteria	p__Proteobacteria	c__Alphaproteobacteria	o__Rhodobacterales	f__Rhodobacteraceae	g__Falsirhodobacter	s__Falsirhodobacter halotolerans	0	0	1	0	0	0	0	2	1	0	0	0	0	0	0	1	1	0	0	0	1	0	0	1	0	2	0	5	3	0	1	0	0	1	3	4	4	0	0	0	1	2
c20cfbb8dbea71faa82b3746d96a8b25_rep;size=168;	Unassigned	Unassigned	Unassigned	Unassigned	Unassigned	Unassigned	Unassigned	1	0	3	0	0	0	0	2	0	0	0	4	0	4	2	3	0	1	0	0	0	3	1	1	0	3	6	3	1	0	1	0	1	2	4	0	2	2	2	0	1	6
fec7dd223ec6e04fa6e39f55658f2d4d_rep;size=168;	Unassigned	Unassigned	Unassigned	Unassigned	Unassigned	Unassigned	Unassigned	5	0	4	0	0	0	1	6	0	0	0	0	0	0	0	4	0	1	0	0	0	2	1	2	0	0	15	4	3	0	3	1	0	0	2	12	3	0	0	1	3	4
[truncated: 15,891 more rows]
[truncated: 78 more columns]

## Sheet: Table S2
Table S2. Abundance for fungal OTUs							Date	01_Dec2019	03_Jun2020	03_Jun2020	03_Jun2020	02_Mar2020	02_Mar2020	03_Jun2020	01_Dec2019	01_Dec2019	02_Mar2020	02_Mar2020	01_Dec2019	03_Jun2020	02_Mar2020	02_Mar2020	03_Jun2020	02_Mar2020	03_Jun2020	01_Dec2019	03_Jun2020	02_Mar2020	02_Mar2020	02_Mar2020	03_Jun2020	01_Dec2019	03_Jun2020	01_Dec2019	03_Jun2020	01_Dec2019	01_Dec2019	03_Jun2020	01_Dec2019	02_Mar2020	03_Jun2020	02_Mar2020	01_Dec2019	03_Jun2020	03_Jun2020	01_Dec2019	03_Jun2020	02_Mar2020	03_Jun2020
[truncated: 3,261 more rows]
[truncated: 78 more columns]

[truncated: 4 more sheets: Table S3, Table S4, Table S5, Table S6]
